# Supplementary material for: Exploring the Characteristics of an Aroma-Blending Mixture by Investigating the Network of Shared Odors and the Molecular Features of Their Related Odorants
Source: MDPI journal article supplement (doi:10.3390/molecules25133032), 2020-07-02
Supplement: s1 [file s1]

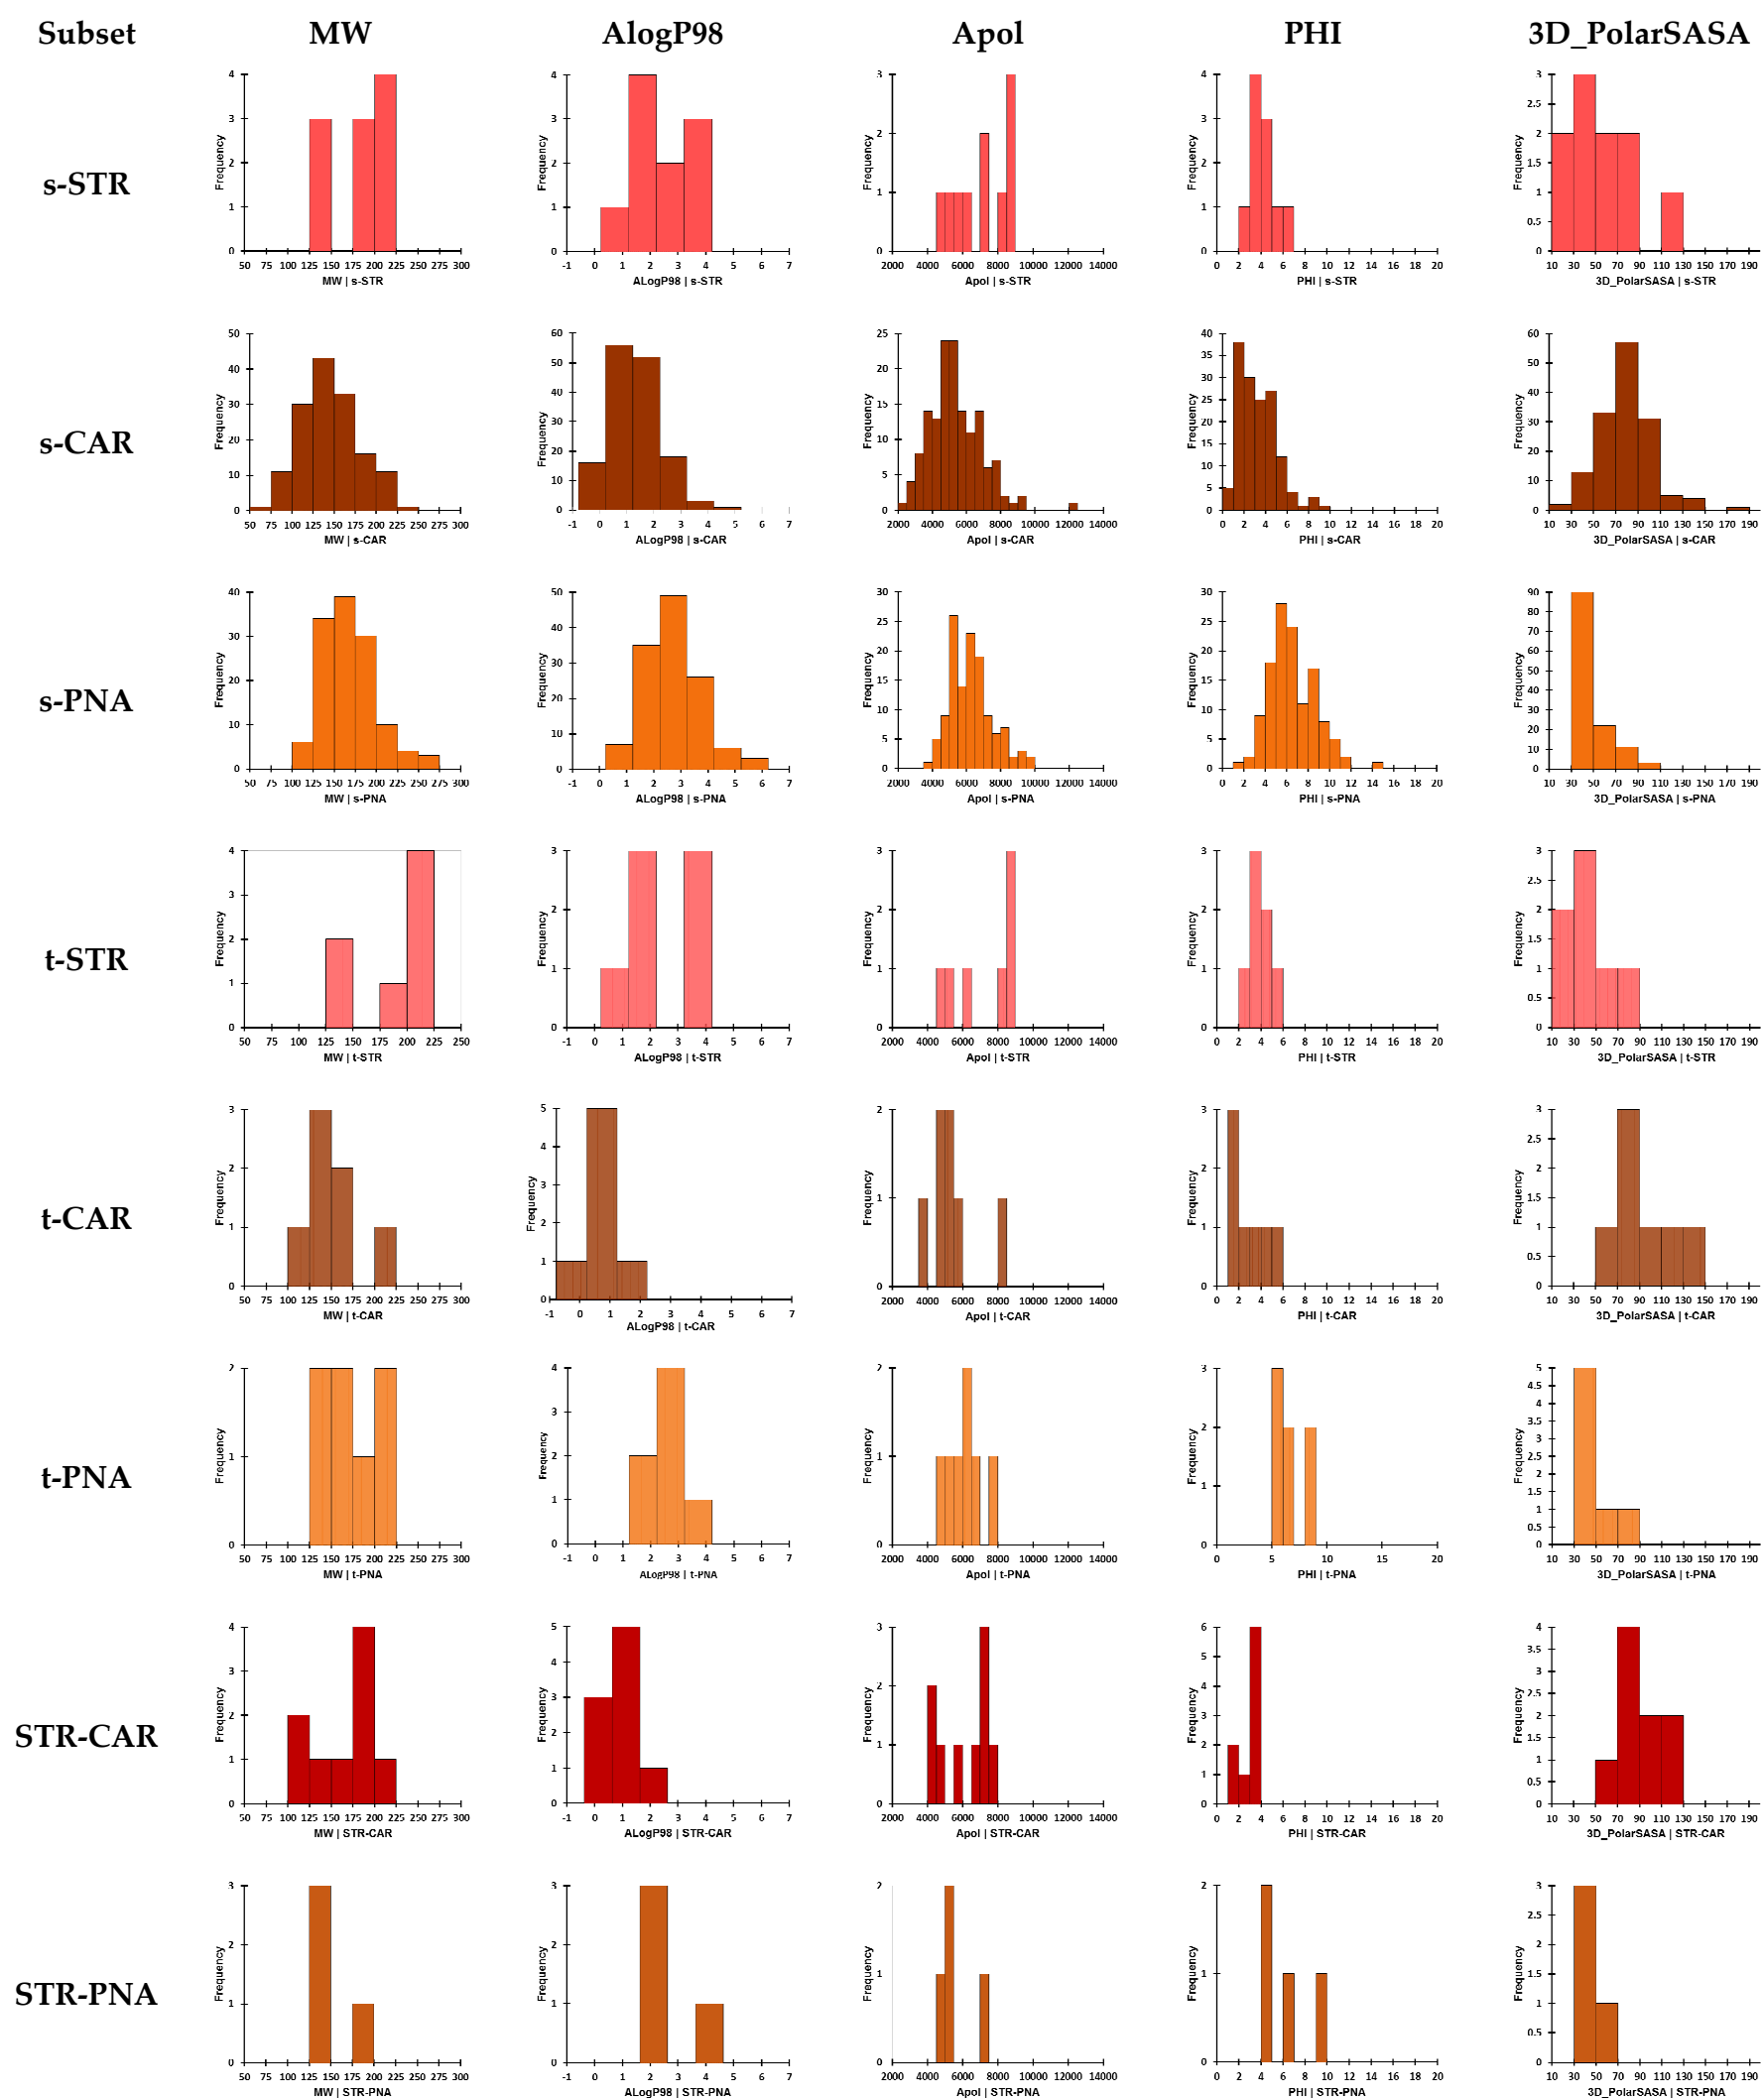

**Figure S1.** Distributions of the molecular property values for the eight subsets (s-STR, s-CAR, s-PNA, t-STR, t-CAR, t-PNA, STR-CAR, and STR-PNA).
