# Supplementary material for: Exploring the Characteristics of an Aroma-Blending Mixture by Investigating the Network of Shared Odors and the Molecular Features of Their Related Odorants
Source: MDPI journal article supplement (doi:10.3390/molecules25133032), 2020-07-02
Supplement: s1 [file s1]

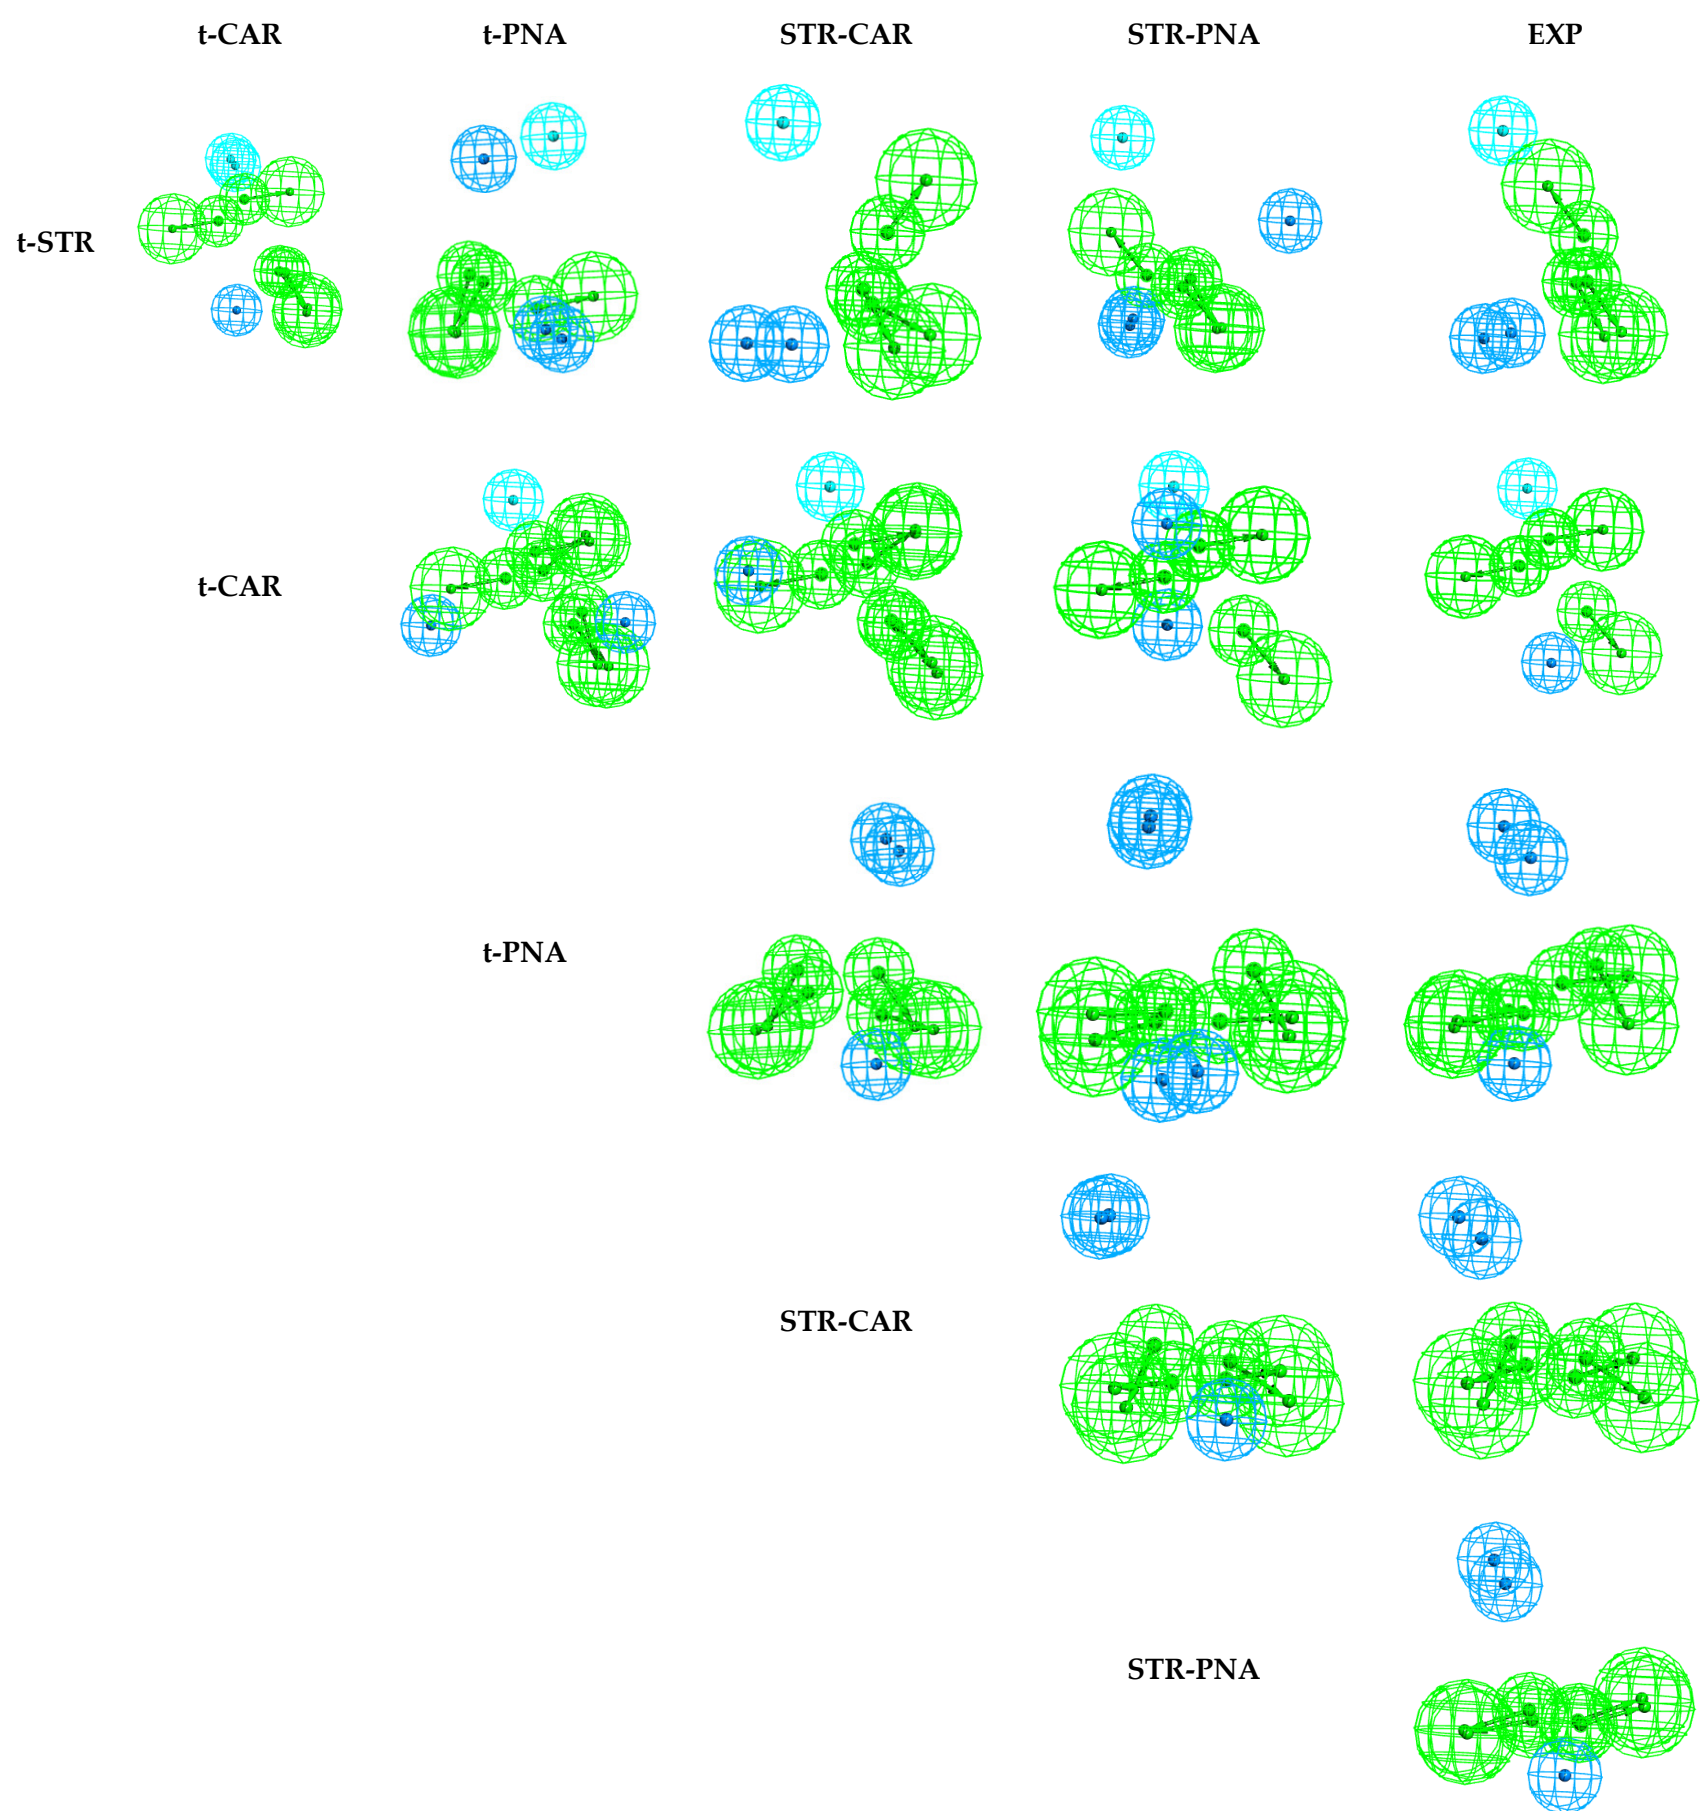

**Figure S2.** Mapping obtained by the Pharmacophore Comparison protocol: visualization of Hypo1 pharmacophores mapped by pairs.
