# Supplementary material for: Exploring the Characteristics of an Aroma-Blending Mixture by Investigating the Network of Shared Odors and the Molecular Features of Their Related Odorants
Source: Molecules. 2020 Jul 2;25(13):3032. doi: 10.3390/molecules25133032 (PMC7411594; doi:10.3390/molecules25133032)
Supplement: Supplementary file 1 [file molecules-25-03032-s001.zip]

Archive with 5 entries (5 files):
- FigureS1.pdf
- FigureS2.pdf
- FigureS3.pdf
- FigureS4.pdf
- Supplementary-Tables.xlsx
