# Supplementary material for: Exploring the Characteristics of an Aroma-Blending Mixture by Investigating the Network of Shared Odors and the Molecular Features of Their Related Odorants
Source: Molecules. 2020 Jul 2;25(13):3032. doi: 10.3390/molecules25133032 (PMC7411594; doi:10.3390/molecules25133032)
Supplement: Supplementary file 1 [file molecules-25-03032-s001.zip › Supplementary-Tables.xlsx]

## Sheet: memo listes Burt et StCaPi-set 
n° FB9-3508	n° FB9	Current Name	name	test liste 293						test liste 294	n° FB9-3508	n° FB9-3808 par Part(-1 -2)	n° FB9	pseudo Current name	Previous Current name	name
56	58	Acetol	Acetol; 1-Hydroxypropan-2-one	1						1	56	56	58	Acetol		Acetol; 1-Hydroxypropan-2-one
59	62	Acetonyl acetate	Acetonyl acetate; 2-Oxopropyl acetate	1						1	59	60	62	Acetonyl acetate		Acetonyl acetate; 2-Oxopropyl acetate
75	80	Acetylcyclopentanone	Acetylcyclopentanone; 2-Acetylcyclopentan-1-one	1						1	75	76	80	Acetylcyclopentanone		Acetylcyclopentanone; 2-Acetylcyclopentan-1-one
77	82	2-Acetyl-3,5-dimethylfuran	Acetyldimethylfuran; 2-Acetyl-3,5-dimethylfuran	1						1	77	78	82	2-Acetyl-3,5-dimethylfuran		Acetyldimethylfuran; 2-Acetyl-3,5-dimethylfuran
90	98	Acetylmethylfuran	Acetylmethylfuran; 2-Acetyl-5-methylfuran;	1						1	90	91	98	Acetylmethylfuran		Acetylmethylfuran; 2-Acetyl-5-methylfuran;
94	102	Acetylmethylpyrimidine	Acetylmethylpyrimidine; 4-Acetyl-2-methylpyrimidine;	1						1	94	95	102	Acetylmethylpyrimidine		Acetylmethylpyrimidine; 4-Acetyl-2-methylpyrimidine;
103	117	2-Acetyl-3,4,5,6-tetrahydropyridine	Acetyltetrahydropyridine; 2-Acetyl-3,4,5,6-tetrahydropyridine	1						1	103	104	117	2-Acetyl-3,4,5,6-tetrahydropyridine		Acetyltetrahydropyridine; 2-Acetyl-3,4,5,6-tetrahydropyridine
111	134	Allyl Thiohexanoate	Allyl Thiohexanoate; S-Allyl hexanethioate	1						1	111	112	134	Allyl Thiohexanoate		Allyl Thiohexanoate; S-Allyl hexanethioate
117	140	Allyl butanoate	Allyl butanoate; Allyl butyrate;	1						1	117	118	140	Allyl butanoate		Allyl butanoate; Allyl butyrate;
121	145	Allyl cyclohexanebutyrate	Allyl cyclohexanebutyrate; Allyl cyclohexanebutanoate;	1						1	121	122	145	Allyl cyclohexanebutyrate		Allyl cyclohexanebutyrate; Allyl cyclohexanebutanoate;
123	147	Allyl cyclohexanepropionate	Allyl cyclohexanepropionate; Allyl cyclohexanepropanoate;	1						1	123	124	147	Allyl cyclohexanepropionate		Allyl cyclohexanepropionate; Allyl cyclohexanepropanoate;
125	149	Allyl cyclohexyloxyacetate	Allyl cyclohexyloxyacetate; Cyclogalbaniff (IFF)	1						1	125	126	149	Allyl cyclohexyloxyacetate		Allyl cyclohexyloxyacetate; Cyclogalbaniff (IFF)
126	150	Allyl cyclohexyloxypropionate	Allyl cyclohexyloxypropionate; allyl 3-(cyclohexyloxy)propanoate	1						1	126	127	150	Allyl cyclohexyloxypropionate		Allyl cyclohexyloxypropionate; allyl 3-(cyclohexyloxy)propanoate
130	156	Allyl furoate	Allyl furoate; Allyl 2-furoate;	1						1	130	131	156	Allyl furoate		Allyl furoate; Allyl 2-furoate;
131	157	Allyl heptanoate	Allyl heptanoate;	1						1	131	132	157	Allyl heptanoate		Allyl heptanoate;
132	158	Allyl hexanoate	Allyl hexanoate; Allyl caproate;	1						1	132	133	158	Allyl hexanoate		Allyl hexanoate; Allyl caproate;
133	159	Allyl ionone	Allyl ionone; Allyl alpha-Ionone; alpha-Allylionone;	1						1	133	134	159	Allyl ionone		Allyl ionone; Allyl alpha-Ionone; alpha-Allylionone;
134	160	Allyl isoamyloxyacetate	Allyl isoamyloxyacetate; Allyl amyl glycolate (so-called)	1						1	134	135	160	Allyl isoamyloxyacetate		Allyl isoamyloxyacetate; Allyl amyl glycolate (so-called)
136	162	Allyl isohexanoate	Allyl isohexanoate; allyl 4-methylpentanoate	1						1	136	137	162	Allyl isohexanoate		Allyl isohexanoate; allyl 4-methylpentanoate
146	172	Allyl methylbutyrate	Allyl methylbutyrate; allyl 2-methylbutyrate	1						1	146	147	172	Allyl methylbutyrate		Allyl methylbutyrate; allyl 2-methylbutyrate
147	173	Allyl methylthiopropionate	Allyl methylthiopropionate; Allyl 3-(methylthio)propionate	1						1	147	148	173	Allyl methylthiopropionate		Allyl methylthiopropionate; Allyl 3-(methylthio)propionate
148	174	Allyl nonanoate	Allyl nonanoate; Allyl pelargonate;	1						1	148	149	174	Allyl nonanoate		Allyl nonanoate; Allyl pelargonate;
149	175	Allyl octanoate	Allyl octanoate; Allyl caprylate;	1						1	149	150	175	Allyl octanoate		Allyl octanoate; Allyl caprylate;
150	176	Allyl pentanoate	Allyl pentanoate; Allyl valerate	1						1	150	151	176	Allyl pentanoate		Allyl pentanoate; Allyl valerate
151	177	Allyl phenoxyacetate	Allyl phenoxyacetate; 2-Propenyl phenoxyacetate;	1						1	151	152	177	Allyl phenoxyacetate		Allyl phenoxyacetate; 2-Propenyl phenoxyacetate;
152	178	2-Propenyl phenylacetate	Allyl phenylacetate; 2-Propenyl phenylacetate;	1						1	152	153	178	Allyl phenylacetate	2-Propenyl phenylacetate	Allyl phenylacetate; 2-Propenyl phenylacetate;
160	187	Allyl sorbate	Allyl sorbate; Allyl 2,4-hexadienoate;	1						1	160	161	187	Allyl sorbate		Allyl sorbate; Allyl 2,4-hexadienoate;
164	191	Allyl undecenoate	Allyl undecenoate; Allyl 10-undecenoate;	1						1	164	165	191	Allyl undecenoate		Allyl undecenoate; Allyl 10-undecenoate;
186	221	Amyl furoate	Amyl furoate; Amyl 2-furoate; Pentyl 2-furoate;	1						1	186	187	221	Amyl furoate		Amyl furoate; Amyl 2-furoate; Pentyl 2-furoate;
188	223	Amyl hexanoate	Amyl hexanoate; Amyl caproate; Pentyl hexanoate;	1						1	188	189	223	Amyl hexanoate		Amyl hexanoate; Amyl caproate; Pentyl hexanoate;
193	228	Amyl keto dioxane	Amyl keto dioxane; 2-Amyl-5-(or 6-)keto-1,4-dioxane;	1						1	193	194	228	5(or 6)-pentyl-dioxan-2-one	Amyl keto dioxane	Amyl keto dioxane; 2-Amyl-5-(or 6-)keto-1,4-dioxane;
194	229	Amyl lactate	Amyl lactate; Pentyl lactate;	1						1	194	196	229	Amyl lactate		Amyl lactate; Pentyl lactate;
195	230	Amyl levulinate	Amyl levulinate; pentyl 4-oxopentanoate	1						1	195	197	230	Amyl levulinate		Amyl levulinate; pentyl 4-oxopentanoate
200	237	Amyl propionate	Amyl propionate; Pentyl propionate	1						1	200	202	237	Amyl propionate		Amyl propionate; Pentyl propionate
213	251	Angelic acid	Angelic acid; cis-2-Methylbut-2-enoic acid	1						1	213	215	251	Angelic acid		Angelic acid; cis-2-Methylbut-2-enoic acid
265	313	Benzyl disulfide	Benzyl disulfide; Dibenzyl disulfide; 1,2-dibenzyldisulfane	1						1	265	268	313	Benzyl disulfide		Benzyl disulfide; Dibenzyl disulfide; 1,2-dibenzyldisulfane
270	318	Benzyl hexanoate	Benzyl hexanoate; Benzyl caproate	1						1	270	273	318	Benzyl hexanoate		Benzyl hexanoate; Benzyl caproate
273	322	Benzyl lactate	Benzyl lactate; Benzyl 2-hydroxypropanoate	1						1	273	276	322	Benzyl lactate		Benzyl lactate; Benzyl 2-hydroxypropanoate
274	323	Benzyl levulinate	Benzyl levulinate; benzyl 4-oxopentanoate	1						1	274	277	323	Benzyl levulinate		Benzyl levulinate; benzyl 4-oxopentanoate
326	385	Butenoic acid	Butenoic acid; But-2-enoic acid (cis or trans)	1						1	326	329	385	Butenoic acid		Butenoic acid; But-2-enoic acid (cis or trans)
336	397	n-Butyl acetate	Butyl acetate; n-Butyl acetate;	1						1	336	339	397	n-Butyl acetate		Butyl acetate; n-Butyl acetate;
338	399	tert-Butyl acetoacetate	Butyl acetoacetate; tert-Butyl acetoacetate	1						1	338	341	399	tert-Butyl acetoacetate		Butyl acetoacetate; tert-Butyl acetoacetate
341	403	Butyl angelate	Butyl angelate; Butyl cis-2-Methyl-2-butenoate;	1						1	341	344	403	Butyl angelate		Butyl angelate; Butyl cis-2-Methyl-2-butenoate;
344	406	sec-Butyl butyrate	Butyl butanoate; sec-Butyl butyrate; 1-Methylpropyl butanoate;	1						1	344	347	406	sec-Butyl butyrate		Butyl butanoate; sec-Butyl butyrate; 1-Methylpropyl butanoate;
345	408	Butyl butenoate	Butyl butenoate; Butyl 2-butenoate; Butyl crotonate	1						1	345	348	408	Butyl crotonate	Butyl butenoate	Butyl butenoate; Butyl 2-butenoate; Butyl crotonate
346	410	Butyl butyrate	Butyl butyrate; Butyl butanoate;	1						1	346	349	410	Butyl butyrate		Butyl butyrate; Butyl butanoate;
347	411	Butyl butyrylglycolate	Butyl butyrylglycolate; Butyl O-butyrylglycollate	1						1	347	350	411	Butyl butyrylglycolate		Butyl butyrylglycolate; Butyl O-butyrylglycollate
359	427	Butyl caproate	Butyl hexanoate; Butyl caproate;	1						1	359	362	427	Butyl caproate		Butyl hexanoate; Butyl caproate;
365	437	n-Butyl 2-hydroxypropanoate	Butyl lactate; n-Butyl 2-hydroxypropanoate;	1						1	365	368	437	n-Butyl 2-hydroxypropanoate		Butyl lactate; n-Butyl 2-hydroxypropanoate;
366	438	sec-Butyl lactate	Butyl lactate; sec-Butyl lactate; 2-Butyl 2-hydroxypropionate	1						1	366	369	438	sec-Butyl lactate		Butyl lactate; sec-Butyl lactate; 2-Butyl 2-hydroxypropionate
368	440	Butyl levulinate	Butyl levulinate;	1						1	368	371	440	Butyl levulinate		Butyl levulinate;
374	446	Butyl methylbutyrate	Butyl methylbutyrate; n-Butyl 2-methylbutyrate	1						1	374	377	446	Butyl methylbutyrate		Butyl methylbutyrate; n-Butyl 2-methylbutyrate
375	447	Butyl methylcrotonate	Butyl methylcrotonate; sec-Butyl 2-methylcrotonate	1						1	375	378	447	Butyl methylcrotonate		Butyl methylcrotonate; sec-Butyl 2-methylcrotonate
417	495	Butylketodioxane	Butylketodioxane; 2-Butyl-5-(or 6)keto-1,4-dioxane;	1						1	417	420	495	5(or 6)-butyl-dioxan-2-one	Butylketodioxane	Butylketodioxane; 2-Butyl-5-(or 6)keto-1,4-dioxane;
500	600	Cinnamyl isobutyrate	Cinnamyl isobutyrate; Cinnamyl 2-methylpropanoate;	1						1	500	504	600	Cinnamyl isobutyrate		Cinnamyl isobutyrate; Cinnamyl 2-methylpropanoate;
522	629	Citronellyl hexanoate	Citronellyl hexanoate; Citronellyl caproate	1						1	522	527	629	Citronellyl hexanoate		Citronellyl hexanoate; Citronellyl caproate
544	653	Crotonic acid	Crotonic acid; 2-Butenoic acid; (E)-2-Butenoic acid;	1						1	544	549	653	Crotonic acid		Crotonic acid; 2-Butenoic acid; (E)-2-Butenoic acid;
560	672	Cyclohexaneacetic acid	Cyclohexaneacetic acid;	1						1	560	565	672	Cyclohexaneacetic acid		Cyclohexaneacetic acid;
569	681	Cyclohexyl acetoacetate	Cyclohexyl acetoacetate; Cyclohexyl 3-oxobutanoate	1						1	569	574	681	Cyclohexyl acetoacetate		Cyclohexyl acetoacetate; Cyclohexyl 3-oxobutanoate
573	685	Cyclohexyl caproate	Cyclohexyl caproate; Cyclohexyl hexanoate;	1						1	573	578	685	Cyclohexyl caproate		Cyclohexyl caproate; Cyclohexyl hexanoate;
579	691	Cyclohexyl propionate	Cyclohexyl propionate; Cyclohexyl propanoate;	1						1	579	584	691	Cyclohexyl propionate		Cyclohexyl propionate; Cyclohexyl propanoate;
598	714	Cyclotene acetate	Cyclotene acetate; Methylcyclopentenolone acetate	1						1	598	603	714	Cyclotene acetate		Cyclotene acetate; Methylcyclopentenolone acetate
599	715	Cyclotene isobutyrate	Cyclotene isobutyrate; Methylcyclopentenolone isobutyrate	1						1	599	604	715	Cyclotene isobutyrate		Cyclotene isobutyrate; Methylcyclopentenolone isobutyrate
600	716	Cyclotene propionate	Cyclotene propionate ; Methylcyclopentenolone propionate	1						1	600	605	716	Cyclotene propionate		Cyclotene propionate ; Methylcyclopentenolone propionate
616	741	epsilon-Decalactone	Decalactone; epsilon-Decalactone; 6-Decanolide;	1						1	616	621	741	epsilon-Decalactone		Decalactone; epsilon-Decalactone; 6-Decanolide;
653	785	9-Decen-2-one	Decenone; 9-Decen-2-one; Dec-9-en-2-one	1						1	653	658	785	9-Decen-2-one		Decenone; 9-Decen-2-one; Dec-9-en-2-one
657	790	Decyl acetate	Decyl acetate; n-Decyl acetate;	1						1	657	662	790	Decyl acetate		Decyl acetate; n-Decyl acetate;
660	793	Decyl hexanoate	Decyl hexanoate; decyl caproate	1						1	660	665	793	Decyl hexanoate		Decyl hexanoate; decyl caproate
748	896	Dihydrodihydroxymethylpyranone	Dihydrodihydroxymethylpyranone; DDMP	1						1	748	755	896	Dihydrodihydroxymethylpyranone		Dihydrodihydroxymethylpyranone; DDMP
842	1006	3,4-Dimethyl-1,2-cyclopentadione	Dimethylcyclopentadione; 3,4-Dimethyl-1,2-cyclopentadione	1						1	842	850	1006	3,4-Dimethyl-1,2-cyclopentadione		Dimethylcyclopentadione; 3,4-Dimethyl-1,2-cyclopentadione
843	1007	3,5-Dimethyl-1,2-cyclopentadione	Dimethylcyclopentadione; 3,5-Dimethyl-1,2-cyclopentadione;	1						1	843	851	1007	3,5-Dimethyl-1,2-cyclopentadione		Dimethylcyclopentadione; 3,5-Dimethyl-1,2-cyclopentadione;
844	1008	Dimethylcyclopentenone	Dimethylcyclopentenone; 3,4-Dimethylcyclopent-2-en-1-one	1						1	844	852	1008	Dimethylcyclopentenone		Dimethylcyclopentenone; 3,4-Dimethylcyclopent-2-en-1-one
849	1014	Dimethylethoxyfuranone	Dimethylethoxyfuranone; 2,5-Dimethyl-4-ethoxyfuran-3(2H)-one	1						1	849	857	1014	Dimethylethoxyfuranone		Dimethylethoxyfuranone; 2,5-Dimethyl-4-ethoxyfuran-3(2H)-one
856	1021	Dimethylfuranone	Dimethylfuranone; 2,5-Dimethyl-3(2H)-furanone	1						1	856	864	1021	Dimethylfuranone		Dimethylfuranone; 2,5-Dimethyl-3(2H)-furanone
871	1041	Dimethylmethoxyfuranone	Dimethylmethoxyfuranone; 2,5-Dimethyl-4-methoxy-3(2H)-furanone	1						1	871	880	1041	Dimethylmethoxyfuranone		Dimethylmethoxyfuranone; 2,5-Dimethyl-4-methoxy-3(2H)-furanone
898	1074	2,3-Dimethylpyrazine	Dimethylpyrazine; 2,3-Dimethylpyrazine;	1						1	898	907	1074	2,3-Dimethylpyrazine		Dimethylpyrazine; 2,3-Dimethylpyrazine;
1017	1213	2-Ethoxy-6-methylpyrazine	Ethoxymethylpyrazine; 2-Ethoxy-6-methylpyrazine	1						1	1017	1026	1213	2-Ethoxy-6-methylpyrazine		Ethoxymethylpyrazine; 2-Ethoxy-6-methylpyrazine
1032	1229	Ethyl acetoxymethylbutyrate	Ethyl acetoxymethylbutyrate; Ethyl 3-acetoxy-2-methylbutyrate	1						1	1032	1041	1229	Ethyl acetoxymethylbutyrate		Ethyl acetoxymethylbutyrate; Ethyl 3-acetoxy-2-methylbutyrate
1035	1233	Ethyl acetoxypropionate	Ethyl acetoxypropionate; Ethyl 2-acetoxypropionate	1						1	1035	1044	1233	Ethyl acetoxypropionate		Ethyl acetoxypropionate; Ethyl 2-acetoxypropionate
1037	1235	Ethyl acetylbutyrate	Ethyl acetylbutyrate; Ethyl 2-acetylbutyrate;	1						1	1037	1046	1235	Ethyl acetylbutyrate		Ethyl acetylbutyrate; Ethyl 2-acetylbutyrate;
1038	1236	Ethyl acetylcinnamate	Ethyl acetylcinnamate; Ethyl 2-acetylcinnamate	1						1	1038	1047	1236	Ethyl acetylcinnamate		Ethyl acetylcinnamate; Ethyl 2-acetylcinnamate
1046	1245	Ethyl aconitate (mixed esters)	Ethyl aconitate (mixed esters);	1						1	1046	1055	1245	Ethyl aconitate (mixed esters)		Ethyl aconitate (mixed esters);
1056	1259	Ethyl butenoate	Ethyl butenoate; Ethyl 2-Butenoate; Ethyl crotonate;	1						1	1056	1065	1259	Ethyl crotonate	Ethyl butenoate	Ethyl butenoate; Ethyl 2-Butenoate; Ethyl crotonate;
1059	1262	Ethyl butyrate	Ethyl butyrate; Ethyl butanoate;	1						1	1059	1068	1262	Ethyl butyrate		Ethyl butyrate; Ethyl butanoate;
1063	1266	Ethyl cyclohexanepropionate	Ethyl cyclohexanepropionate; Ethyl 3-cyclohexylpropionate	1						1	1063	1072	1266	Ethyl cyclohexanepropionate		Ethyl cyclohexanepropionate; Ethyl 3-cyclohexylpropionate
1069	1273	Ethyl cis-4-decenoate	Ethyl decenoate; Ethyl cis-4-decenoate; Ethyl (Z)-4-decenoate	1						1	1069	1078	1273	Ethyl cis-4-decenoate		Ethyl decenoate; Ethyl cis-4-decenoate; Ethyl (Z)-4-decenoate
1072	1276	Ethyl trans-4-decenoate	Ethyl decenoate; Ethyl trans-4-decenoate;	1						1	1072	1081	1276	Ethyl trans-4-decenoate		Ethyl decenoate; Ethyl trans-4-decenoate;
1073	1278	Ethyl dioxohexanoate	Ethyl dioxohexanoate; Ethyl 2,4-dioxohexanoate;	1						1	1073	1082	1278	Ethyl dioxohexanoate		Ethyl dioxohexanoate; Ethyl 2,4-dioxohexanoate;
1076	1282	Ethyl ethoxycrotonate	Ethyl ethoxycrotonate; Ethyl trans-3-ethoxycrotonate	1						1	1076	1085	1282	Ethyl ethoxycrotonate		Ethyl ethoxycrotonate; Ethyl trans-3-ethoxycrotonate
1090	1300	Ethyl furylpropanoate	Ethyl furylpropanoate; Ethyl 3-(2-furyl)propanoate;	1						1	1090	1099	1300	Ethyl furylpropanoate		Ethyl furylpropanoate; Ethyl 3-(2-furyl)propanoate;
1097	1310	Ethyl hexanoate	Ethyl hexanoate; Ethyl caproate;	1						1	1097	1106	1310	Ethyl hexanoate		Ethyl hexanoate; Ethyl caproate;
1099	1314	Ethyl 5-hexenoate	Ethyl hexenoate; Ethyl 5-hexenoate;	1						1	1099	1108	1314	Ethyl 5-hexenoate		Ethyl hexenoate; Ethyl 5-hexenoate;
1100	1315	Ethyl cis-3-hexenoate	Ethyl hexenoate; Ethyl cis-3-hexenoate	1						1	1100	1109	1315	Ethyl cis-3-hexenoate		Ethyl hexenoate; Ethyl cis-3-hexenoate
1107	1325	Ethyl 2-hydroxy-2-methylbutyrate	Ethyl hydroxymethylbutyrate; Ethyl 2-hydroxy-2-methylbutyrate	1						1	1107	1116	1325	Ethyl 2-hydroxy-2-methylbutyrate		Ethyl hydroxymethylbutyrate; Ethyl 2-hydroxy-2-methylbutyrate
1112	1332	Ethyl 5-hydroxyoctanoate	Ethyl hydroxyoctanoate; Ethyl 5-hydroxyoctanoate	1						1	1112	1121	1332	Ethyl 5-hydroxyoctanoate		Ethyl hydroxyoctanoate; Ethyl 5-hydroxyoctanoate
1113	1335	Ethyl isobutyrate	Ethyl isobutyrate; Ethyl 2-methylpropanoate;	1						1	1113	1122	1335	Ethyl isobutyrate		Ethyl isobutyrate; Ethyl 2-methylpropanoate;
1114	1336	Ethyl isohexanoate	Ethyl isohexanoate; ethyl 4-methylpentanoate	1						1	1114	1123	1336	Ethyl isohexanoate		Ethyl isohexanoate; ethyl 4-methylpentanoate
1119	1343	Ethyl levulinate propylene glycol ketal	Ethyl levulinate propylene glycol ketal	1						1	1119	1128	1343	Ethyl levulinate propylene glycol ketal		Ethyl levulinate propylene glycol ketal
1120	1344	Ethyl levulinate	Ethyl levulinate; Ethyl 4-oxopentanoate;	1						1	1120	1129	1344	Ethyl levulinate		Ethyl levulinate; Ethyl 4-oxopentanoate;
1125	1349	Ethyl maltol butyrate	Ethyl maltol butyrate; 2-ethyl-4-oxo-4H-pyran-3-yl butyrate	1						1	1125	1134	1349	Ethyl maltol butyrate		Ethyl maltol butyrate; 2-ethyl-4-oxo-4H-pyran-3-yl butyrate
1126	1350	Ethyl maltol isobutyrate	Ethyl maltol isobutyrate;	1						1	1126	1135	1350	Ethyl maltol isobutyrate		Ethyl maltol isobutyrate;
1127	1351	Ethyl maltol propionate	Ethyl maltol propionate; 2-ethyl-4-oxo-4H-pyran-3-yl propionate	1						1	1127	1136	1351	Ethyl maltol propionate		Ethyl maltol propionate; 2-ethyl-4-oxo-4H-pyran-3-yl propionate
1128	1352	Ethyl maltol	Ethyl maltol; Veltol Plus*	1						1	1128	1137	1352	Ethyl maltol		Ethyl maltol; Veltol Plus*
1144	1368	Ethyl methylbutyrate	Ethyl methylbutyrate; Ethyl 2-methylbutyrate;	1						1	1144	1153	1368	Ethyl methylbutyrate		Ethyl methylbutyrate; Ethyl 2-methylbutyrate;
1145	1369	Ethyl methyldithiopropionate	Ethyl methyldithiopropionate; Ethyl 2-(methyldithio)propionate	1						1	1145	1154	1369	Ethyl methyldithiopropionate		Ethyl methyldithiopropionate; Ethyl 2-(methyldithio)propionate
1148	1372	Ethyl 2-methylpentanoate	Ethyl methylpentanoate; Ethyl 2-methylpentanoate;	1						1	1148	1157	1372	Ethyl 2-methylpentanoate		Ethyl methylpentanoate; Ethyl 2-methylpentanoate;
1149	1373	Ethyl 3-methylpentanoate	Ethyl methylpentanoate; Ethyl 3-methylpentanoate;	1						1	1149	1158	1373	Ethyl 3-methylpentanoate		Ethyl methylpentanoate; Ethyl 3-methylpentanoate;
1151	1377	Ethyl 2-methyl-4-pentenoate	Ethyl methylpentenoate; Ethyl 2-methyl-4-pentenoate;	1						1	1151	1160	1377	Ethyl 2-methyl-4-pentenoate		Ethyl methylpentenoate; Ethyl 2-methyl-4-pentenoate;
1152	1378	Ethyl 4-methylpent-3-enoate	Ethyl methylpentenoate; Ethyl 4-methylpent-3-enoate	1						1	1152	1161	1378	Ethyl 4-methylpent-3-enoate		Ethyl methylpentenoate; Ethyl 4-methylpent-3-enoate
1153	1379	Ethyl methylphenylglycidate	Ethyl methylphenylglycidate; Aldehyde C-16 (so-called);	1						1	1153	1162	1379	Ethyl methylphenylglycidate		Ethyl methylphenylglycidate; Aldehyde C-16 (so-called);
1165	1396	Ethyl 2-nonenoate	Ethyl nonenoate; Ethyl 2-nonenoate	1						1	1165	1174	1396	Ethyl 2-nonenoate		Ethyl nonenoate; Ethyl 2-nonenoate
1168	1399	Ethyl octadienoate	Ethyl octadienoate; Ethyl cis-4,7-octadienoate;	1						1	1168	1177	1399	Ethyl octadienoate		Ethyl octadienoate; Ethyl cis-4,7-octadienoate;
1170	1401	Ethyl cis-4-octenoate	Ethyl octenoate; Ethyl cis-4-octenoate;	1						1	1170	1179	1401	Ethyl cis-4-octenoate		Ethyl octenoate; Ethyl cis-4-octenoate;
1171	1403	Ethyl trans-2-octenoate	Ethyl octenoate; Ethyl trans-2-octenoate	1						1	1171	1180	1403	Ethyl trans-2-octenoate		Ethyl octenoate; Ethyl trans-2-octenoate
1172	1404	Ethyl trans-3-octenoate	Ethyl octenoate; Ethyl trans-3-octenoate; Ethyl (E)-3-octenoate;	1						1	1172	1181	1404	Ethyl trans-3-octenoate		Ethyl octenoate; Ethyl trans-3-octenoate; Ethyl (E)-3-octenoate;
1175	1408	Ethyl oxohexanoate	Ethyl oxohexanoate; Ethyl 3-oxohexanoate;	1						1	1175	1184	1408	Ethyl oxohexanoate		Ethyl oxohexanoate; Ethyl 3-oxohexanoate;
1185	1421	Ethyl phenylglycidate	Ethyl phenylglycidate; Ethyl 3-phenylglycidate;	1						1	1185	1194	1421	Ethyl phenylglycidate		Ethyl phenylglycidate; Ethyl 3-phenylglycidate;
1196	1433	Ethyl pyruvate	Ethyl pyruvate; Ethyl 2-oxopropionate;	1						1	1196	1205	1433	Ethyl pyruvate		Ethyl pyruvate; Ethyl 2-oxopropionate;
1200	1437	Ethyl senecioate	Ethyl senecioate; Ethyl methylcrotonate; Ethyl 3-methylcrotonate	1						1	1200	1211	1437	Ethyl senecioate		Ethyl senecioate; Ethyl methylcrotonate; Ethyl 3-methylcrotonate
1203	1441	Ethyl tiglate	Ethyl tiglate; Ethyl trans-2-methylbut-2-enoate;	1						1	1203	1214	1441	Ethyl tiglate		Ethyl tiglate; Ethyl trans-2-methylbut-2-enoate;
1208	1447	Ethyl valerate	Ethyl valerate; Ethyl pentanoate;	1						1	1208	1219	1447	Ethyl valerate		Ethyl valerate; Ethyl pentanoate;
1220	1462	Ethylbutyraldehyde	Ethylbutyraldehyde; 2-Ethylbutyraldehyde; 2-Ethylbutanal;	1						1	1220	1231	1462	Ethylbutyraldehyde		Ethylbutyraldehyde; 2-Ethylbutyraldehyde; 2-Ethylbutanal;
1253	1501	Ethylhydroxycyclopentenone	Ethylhydroxycyclopentenone; Ethylcyclopentenolone;	1						1	1253	1264	1501	Ethylhydroxycyclopentenone		Ethylhydroxycyclopentenone; Ethylcyclopentenolone;
1254	1502	3-Ethyl-4-methylcyclotene	Ethylhydroxymethylcyclopentenone; 3-Ethyl-4-methylcyclotene;	1						1	1254	1265	1502	3-Ethyl-4-methylcyclotene		Ethylhydroxymethylcyclopentenone; 3-Ethyl-4-methylcyclotene;
1255	1503	5-Ethyl-3-methylcyclotene	Ethylhydroxymethylcyclopentenone; 5-Ethyl-3-methylcyclotene;	1						1	1255	1266	1503	5-Ethyl-3-methylcyclotene		Ethylhydroxymethylcyclopentenone; 5-Ethyl-3-methylcyclotene;
1256	1504	2-Ethyl-4-hydroxy-5-methyl-3(2H)-furanone	Ethylhydroxymethylfuranone;2-Ethyl-4-hydroxy-5-methyl-3-furanone	1						1	1256	1267	1504	2-Ethyl-4-hydroxy-5-methyl-3(2H)-furanone		Ethylhydroxymethylfuranone;2-Ethyl-4-hydroxy-5-methyl-3-furanone
1289	1543	Ethylthiophenecarbaldehyde	Ethylthiophenecarbaldehyde; 5-Ethylthiophene-2-carbaldehyde	1						1	1289	1301	1543	Ethylthiophenecarbaldehyde		Ethylthiophenecarbaldehyde; 5-Ethylthiophene-2-carbaldehyde
1319	1580	Fraistone	Fraistone; Ethyl acetoacetate propylene glycol ketal	1						1	1319	1331	1580	Fraistone		Fraistone; Ethyl acetoacetate propylene glycol ketal
1321	1583	Furaneyl butyrate	Furaneyl butyrate; Furaneol butyrate	1						1	1321	1333	1583	Furaneyl butyrate		Furaneyl butyrate; Furaneol butyrate
1326	1589	Furfural	Furfural;	1						1	1326	1338	1589	Furfural		Furfural;
1333	1600	Furfuryl mercaptan	Furfuryl mercaptan;	1						1	1333	1345	1600	Furfuryl mercaptan		Furfuryl mercaptan;
1337	1607	alpha-Furfuryl pentanoate	Furfuryl pentanoate; alpha-Furfuryl pentanoate;	1						1	1337	1349	1607	alpha-Furfuryl pentanoate		Furfuryl pentanoate; alpha-Furfuryl pentanoate;
1342	1612	Furfurylidenebutyraldehyde	Furfurylidenebutyraldehyde; 2-Furfurylidene butyraldehyde;	1						1	1342	1354	1612	Furfurylidenebutyraldehyde		Furfurylidenebutyraldehyde; 2-Furfurylidene butyraldehyde;
1349	1621	Furylbutanone	Furylbutanone; 1-(2-Furyl)butan-3-one;	1						1	1349	1361	1621	Furylbutanone		Furylbutanone; 1-(2-Furyl)butan-3-one;
1351	1623	Furylmethylketone	Furylmethylketone; 2-Furyl methyl ketone; 2-Acetylfuran;	1						1	1351	1363	1623	Furylmethylketone		Furylmethylketone; 2-Furyl methyl ketone; 2-Acetylfuran;
1352	1625	Furylpropanone	Furylpropanone; (2-Furyl)-2-propanone;	1						1	1352	1364	1625	Furylpropanone		Furylpropanone; (2-Furyl)-2-propanone;
1366	1641	Geranyl hexanoate	Geranyl hexanoate; Geranyl caproate;	1						1	1366	1378	1641	Geranyl hexanoate		Geranyl hexanoate; Geranyl caproate;
1376	1652	Geranyl valerate	Geranyl valerate; Geranyl pentanoate	1						1	1376	1388	1652	Geranyl valerate		Geranyl valerate; Geranyl pentanoate
1425	1732	trans-2-Heptenoic acid	Heptenoic acid; trans-2-Heptenoic acid	1						1	1425	1437	1732	trans-2-Heptenoic acid		Heptenoic acid; trans-2-Heptenoic acid
1434	1742	trans-2-Heptenyl acetate	Heptenyl acetate (trans isomer); trans-2-Heptenyl acetate;	1						1	1434	1446	1742	trans-2-Heptenyl acetate		Heptenyl acetate (trans isomer); trans-2-Heptenyl acetate;
1476	1791	Hexadienyl acetate	Hexadienyl acetate; 2,4-Hexadienyl acetate; Sorbyl acetate	1						1	1476	1488	1791	Hexadienyl acetate		Hexadienyl acetate; 2,4-Hexadienyl acetate; Sorbyl acetate
1478	1793	Hexadienyl isobutyrate	Hexadienyl isobutyrate; 2,4-Hexadienyl isobutyrate	1						1	1478	1490	1793	Hexadienyl isobutyrate		Hexadienyl isobutyrate; 2,4-Hexadienyl isobutyrate
1479	1794	Hexadienyl propionate	Hexadienyl propionate; 2,4-Hexadienyl propionate	1						1	1479	1491	1794	Hexadienyl propionate		Hexadienyl propionate; 2,4-Hexadienyl propionate
1536	1858	Hexenolactone	Hexenolactone; Hex-2-eno-1,4-lactone; 5-Ethyl-2(5H)-furanone	1						1	1536	1549	1858	Hexenolactone		Hexenolactone; Hex-2-eno-1,4-lactone; 5-Ethyl-2(5H)-furanone
1555	1880	5-Hexenyl butyrate	Hexenyl butyrate; 5-Hexenyl butyrate	1						1	1555	1568	1880	5-Hexenyl butyrate		Hexenyl butyrate; 5-Hexenyl butyrate
1566	1893	Hexenyl furoate	Hexenyl furoate; cis-3-Hexenyl 2-furoate	1						1	1566	1579	1893	Hexenyl furoate		Hexenyl furoate; cis-3-Hexenyl 2-furoate
1575	1904	cis-3-Hexenyl trans-2-hexenoate	Hexenyl hexenoate; cis-3-Hexenyl trans-2-hexenoate	1						1	1575	1588	1904	cis-3-Hexenyl trans-2-hexenoate		Hexenyl hexenoate; cis-3-Hexenyl trans-2-hexenoate
1576	1906	5-Hexenyl isobutyrate	Hexenyl isobutyrate; 5-Hexenyl isobutyrate	1						1	1576	1589	1906	5-Hexenyl isobutyrate		Hexenyl isobutyrate; 5-Hexenyl isobutyrate
1584	1915	Hexenyl levulinate	Hexenyl levulinate; cis-3-Hexenyl levulinate	1						1	1584	1597	1915	Hexenyl levulinate		Hexenyl levulinate; cis-3-Hexenyl levulinate
1586	1919	cis-3-Hexenyl 2-methylbutanoate	Hexenyl methylbutanoate; cis-3-Hexenyl 2-methylbutanoate;	1						1	1586	1599	1919	cis-3-Hexenyl 2-methylbutanoate		Hexenyl methylbutanoate; cis-3-Hexenyl 2-methylbutanoate;
1599	1937	Hexenyl pyruvate	Hexenyl pyruvate; cis-3-Hexenyl 2-oxopropionate	1						1	1599	1612	1937	Hexenyl pyruvate		Hexenyl pyruvate; cis-3-Hexenyl 2-oxopropionate
1603	1941	(E)-2-Hexenyl valerate	Hexenyl valerate; (E)-2-Hexenyl valerate;	1						1	1603	1616	1941	(E)-2-Hexenyl valerate		Hexenyl valerate; (E)-2-Hexenyl valerate;
1609	1948	Hexyl 2-butenoate	Hexyl butenoate; Hexyl 2-butenoate	1						1	1609	1623	1948	Hexyl 2-crotonate	Hexyl 2-butenoate	Hexyl butenoate; Hexyl 2-butenoate
1624	1964	Hexyl levulinate	Hexyl levulinate	1						1	1624	1638	1964	Hexyl levulinate		Hexyl levulinate
1669	2020	Hydroxybutanoic acid lactone	Hydroxybutanoic acid lactone; gamma-Butyrolactone	1						1	1669	1685	2020	Hydroxybutanoic acid lactone		Hydroxybutanoic acid lactone; gamma-Butyrolactone
1670	2021	1-Hydroxy-2-butanone	Hydroxybutanone; 1-Hydroxy-2-butanone;	1						1	1670	1686	2021	1-Hydroxy-2-butanone		Hydroxybutanone; 1-Hydroxy-2-butanone;
1671	2022	4-Hydroxybutan-2-one	Hydroxybutanone; 4-Hydroxybutan-2-one	1						1	1671	1687	2022	4-Hydroxybutan-2-one		Hydroxybutanone; 4-Hydroxybutan-2-one
1681	2036	Hydroxycyclohexenone	Hydroxycyclohexenone; 2-Hydroxy-2-cyclohexen-1-one;	1						1	1681	1697	2036	Hydroxycyclohexenone		Hydroxycyclohexenone; 2-Hydroxy-2-cyclohexen-1-one;
1684	2039	Hydroxydimethyloctanoic acid lactone	Hydroxydimethyloctanoic acid lactone; Menthone lactone;	1						1	1684	1700	2039	Hydroxydimethyloctanoic acid lactone		Hydroxydimethyloctanoic acid lactone; Menthone lactone;
1687	2044	Hydroxyhexanone	Hydroxyhexanone; 4-Hydroxyhexan-3-one; 4-Hydroxy-3-hexanone;	1						1	1687	1703	2044	Hydroxyhexanone		Hydroxyhexanone; 4-Hydroxyhexan-3-one; 4-Hydroxy-3-hexanone;
1689	2047	Hydroxyisophorone	Hydroxyisophorone; 2-Hydroxy-3,5,5-trimethyl-2-cyclohexenone;	1						1	1689	1705	2047	Hydroxyisophorone		Hydroxyisophorone; 2-Hydroxy-3,5,5-trimethyl-2-cyclohexenone;
1695	2055	Hydroxymethylbenzaldehyde	Hydroxymethylbenzaldehyde; 2-Hydroxy-4-methylbenzaldehyde;	1						1	1695	1711	2055	Hydroxymethylbenzaldehyde		Hydroxymethylbenzaldehyde; 2-Hydroxy-4-methylbenzaldehyde;
1696	2056	Hydroxymethylfuranone	Hydroxymethylfuranone; 4-Hydroxy-5-methyl-3(2H)-Furanone;	1						1	1696	1712	2056	Hydroxymethylfuranone		Hydroxymethylfuranone; 4-Hydroxy-5-methyl-3(2H)-Furanone;
1705	2068	Hydroxymethylthienylethanone	Hydroxymethylthienylethanone;	1						1	1705	1722	2068	Hydroxymethylthienylethanone		Hydroxymethylthienylethanone;
1709	2072	3-Hydroxy-2-pentanone	Hydroxypentanone; 3-Hydroxy-2-pentanone;	1						1	1709	1726	2072	3-Hydroxy-2-pentanone		Hydroxypentanone; 3-Hydroxy-2-pentanone;
1711	2075	Hydroxyphenylbutanone	Hydroxyphenylbutanone; 3-Hydroxy-4-phenyl-2-butanone	1						1	1711	1728	2075	Hydroxyphenylbutanone		Hydroxyphenylbutanone; 3-Hydroxy-4-phenyl-2-butanone
1741	2108	Isoamyl furanpropionate	Isoamyl furanpropionate; Isoamyl 3-(2-furan)-propionate;	1						1	1741	1758	2108	Isoamyl furanpropionate		Isoamyl furanpropionate; Isoamyl 3-(2-furan)-propionate;
1744	2111	Isoamyl hexanoate	Isoamyl hexanoate; Isoamyl caproate; Isopentyl hexanoate;	1						1	1744	1761	2111	Isoamyl hexanoate		Isoamyl hexanoate; Isoamyl caproate; Isopentyl hexanoate;
1747	2114	Isoamyl isovalerate	Isoamyl isovalerate; Isoamyl 3-methylbutanoate;	1						1	1747	1764	2114	Isoamyl isovalerate		Isoamyl isovalerate; Isoamyl 3-methylbutanoate;
1748	2115	Isoamyl lactate	Isoamyl lactate; Isopentyl lactate	1						1	1748	1765	2115	Isoamyl lactate		Isoamyl lactate; Isopentyl lactate
1750	2117	Isoamyl levulinate	Isoamyl levulinate; Isoamyl 4-oxopentanoate	1						1	1750	1767	2117	Isoamyl levulinate		Isoamyl levulinate; Isoamyl 4-oxopentanoate
1754	2122	Isoamyl octanoate	Isoamyl octanoate; Isopentyl octanoate; Isoamyl caprylate;	1						1	1754	1771	2122	Isoamyl octanoate		Isoamyl octanoate; Isopentyl octanoate; Isoamyl caprylate;
1759	2127	Isoamyl propionate	Isoamyl propionate; Isopentyl propionate; Isoamyl propanoate;	1						1	1759	1776	2127	Isoamyl propionate		Isoamyl propionate; Isopentyl propionate; Isoamyl propanoate;
1760	2128	Isoamyl pyruvate	Isoamyl pyruvate; Isopentyl pyruvate; 3-Methylbutyl pyruvate;	1						1	1760	1777	2128	Isoamyl pyruvate		Isoamyl pyruvate; Isopentyl pyruvate; 3-Methylbutyl pyruvate;
1785	2153	Isobutyl acetate	Isobutyl acetate;	1						1	1785	1802	2153	Isobutyl acetate		Isobutyl acetate;
1791	2159	Isobutyl butenoate	Isobutyl butenoate; Isobutyl 2-butenoate;	1						1	1791	1808	2159	Isobutyl crotonate	Isobutyl butenoate	Isobutyl butenoate; Isobutyl 2-butenoate;
1792	2160	Isobutyl butyrate	Isobutyl butyrate; 2-Methylpropyl butanoate;	1						1	1792	1809	2160	Isobutyl butyrate		Isobutyl butyrate; 2-Methylpropyl butanoate;
1795	2163	Isobutyl decenoate	Isobutyl decenoate; Isobutyl 4-decenoate	1						1	1795	1812	2163	isobutyl dec-4-enoate	Isobutyl decenoate	Isobutyl decenoate; Isobutyl 4-decenoate
1798	2166	Isobutyl furanpropionate	Isobutyl furanpropionate; Isobutyl 3-(2-furyl)propionate;	1						1	1798	1815	2166	Isobutyl furanpropionate		Isobutyl furanpropionate; Isobutyl 3-(2-furyl)propionate;
1800	2169	Isobutyl hexanoate	Isobutyl hexanoate; Isobutyl caproate;	1						1	1800	1817	2169	Isobutyl hexanoate		Isobutyl hexanoate; Isobutyl caproate;
1803	2172	Isobutyl isobutyrate	Isobutyl isobutyrate; 2-Methylpropyl 2-methylpropanoate;	1						1	1803	1820	2172	Isobutyl isobutyrate		Isobutyl isobutyrate; 2-Methylpropyl 2-methylpropanoate;
1806	2175	Isobutyl lactate	Isobutyl lactate; 2-Methylpropyl 2-hydroxypropionate	1						1	1806	1823	2175	Isobutyl lactate		Isobutyl lactate; 2-Methylpropyl 2-hydroxypropionate
1807	2176	Isobutyl levulinate	Isobutyl levulinate; Isobutyl 4-oxopentanoate	1						1	1807	1824	2176	Isobutyl levulinate		Isobutyl levulinate; Isobutyl 4-oxopentanoate
1812	2182	Isobutyl methylthiobutyrate	Isobutyl methylthiobutyrate; Isobutyl 3-methylthylthiobutyrate	1						1	1812	1829	2182	Isobutyl methylthiobutyrate		Isobutyl methylthiobutyrate; Isobutyl 3-methylthylthiobutyrate
1817	2187	Isobutyl pivalate	Isobutyl pivalate; Isobutyl 2,2-dimethylpropanoate	1						1	1817	1834	2187	Isobutyl pivalate		Isobutyl pivalate; Isobutyl 2,2-dimethylpropanoate
1870	2244	Isopentyl methylthiopropionate	Isopentyl methylthiopropionate; Isoamyl methylthiopropionate;	1						1	1870	1886	2244	Isopentyl methylthiopropionate		Isopentyl methylthiopropionate; Isoamyl methylthiopropionate;
1881	2255	Isoprenyl hexanoate	Isoprenyl hexanoate;	1						1	1881	1897	2255	Isoprenyl hexanoate		Isoprenyl hexanoate;
1890	2266	Isopropyl acetoacetate	Isopropyl acetoacetate; Isopropyl 3-oxobutanoate	1						1	1890	1906	2266	Isopropyl acetoacetate		Isopropyl acetoacetate; Isopropyl 3-oxobutanoate
1892	2269	Isopropyl butyrate	Isopropyl butyrate; Isopropyl butanoate;	1						1	1892	1908	2269	Isopropyl butyrate		Isopropyl butyrate; Isopropyl butanoate;
1898	2276	Isopropyl hexanoate	Isopropyl hexanoate; Isopropyl caproate;	1						1	1898	1914	2276	Isopropyl hexanoate		Isopropyl hexanoate; Isopropyl caproate;
1899	2277	Isopropyl isobutyrate	Isopropyl isobutyrate; Isopropyl 2-methylpropanoate;	1						1	1899	1915	2277	Isopropyl isobutyrate		Isopropyl isobutyrate; Isopropyl 2-methylpropanoate;
1900	2278	Isopropyl isohexanoate	Isopropyl isohexanoate; isopropyl 4-methylpentanoate	1						1	1900	1916	2278	Isopropyl isohexanoate		Isopropyl isohexanoate; isopropyl 4-methylpentanoate
1902	2280	Isopropyl isovalerate	Isopropyl isovalerate; Isopropyl 3-methylbutanoate;	1						1	1902	1918	2280	Isopropyl isovalerate		Isopropyl isovalerate; Isopropyl 3-methylbutanoate;
1903	2281	Isopropyl lactate	Isopropyl lactate; Isopropyl 2-hydroxypropanoate	1						1	1903	1919	2281	Isopropyl lactate		Isopropyl lactate; Isopropyl 2-hydroxypropanoate
1910	2288	Isopropyl methylbutyrate	Isopropyl methylbutyrate; Isopropyl 2-methylbutyrate;	1						1	1910	1926	2288	Isopropyl methylbutyrate		Isopropyl methylbutyrate; Isopropyl 2-methylbutyrate;
1977	2369	Levulinic acid	Levulinic acid; 4-Oxopentanoic acid;	1						1	1977	1996	2369	Levulinic acid		Levulinic acid; 4-Oxopentanoic acid;
2010	2414	Maltol Propionate	Maltol Propionate; Maltyl propionate	1						1	2010	2029	2414	Maltol Propionate		Maltol Propionate; Maltyl propionate
2011	2415	Maltol butyrate	Maltol butyrate; 2-methyl-4-oxo-4H-pyran-3-yl butyrate	1						1	2011	2030	2415	Maltol butyrate		Maltol butyrate; 2-methyl-4-oxo-4H-pyran-3-yl butyrate
2012	2416	2-Methyl-4-pyron-3-yl 2-methylpropanoate	Maltol isobutyrate; Maltyl 2-methylpropanoate;	1						1	2012	2031	2416	Maltyl 2-methylpropanoate		Maltol isobutyrate; Maltyl 2-methylpropanoate;
2013	2417	Maltol	Maltol; Veltol ; Corps praline; Palatone	1						1	2013	2032	2417	Maltol		Maltol; Veltol ; Corps praline; Palatone
2014	2418	Maple furanone	Maple furanone; 5-Ethyl-3-hydroxy-4-methyl-2(5H)-furanone;	1						1	2014	2033	2418	Maple furanone	temporairement "Abhexone" ; annulé	Maple furanone; 5-Ethyl-3-hydroxy-4-methyl-2(5H)-furanone;
2110	2540	Methionyl butyrate	Methionyl butyrate; 3-(Methylthio)propyl butyrate	1						1	2110	2129	2540	Methionyl butyrate		Methionyl butyrate; 3-(Methylthio)propyl butyrate
2139	2581	Methoxyphenylpentenone	Methoxyphenylpentenone; 1-(p-Methoxyphenyl)-1-penten-3-one;	1						1	2139	2158	2581	Methoxyphenylpentenone		Methoxyphenylpentenone; 1-(p-Methoxyphenyl)-1-penten-3-one;
2149	2593	Methoxystyryl isopropyl ketone	Methoxystyryl isopropyl ketone; "Homo-Ethone";	1						1	2149	2168	2593	Methoxystyryl isopropyl ketone		Methoxystyryl isopropyl ketone; "Homo-Ethone";
2156	2601	Methyl acetoxybutyrate	Methyl acetoxybutyrate; Methyl 3-acetoxybutyrate	1						1	2156	2175	2601	Methyl acetoxybutyrate		Methyl acetoxybutyrate; Methyl 3-acetoxybutyrate
2160	2605	(+/-)-Methyl 5-acetoxyhexanoate	Methyl acetoxyhexanoate; (+/-)-Methyl 5-acetoxyhexanoate	1						1	2160	2179	2605	(+/-)-Methyl 5-acetoxyhexanoate		Methyl acetoxyhexanoate; (+/-)-Methyl 5-acetoxyhexanoate
2161	2607	Methyl acetoxymethylbutyrate	Methyl acetoxymethylbutyrate; Methyl 3-acetoxy-2-methylbutyrate	1						1	2161	2180	2607	Methyl acetoxymethylbutyrate		Methyl acetoxymethylbutyrate; Methyl 3-acetoxy-2-methylbutyrate
2206	2660	Methyl furoate	Methyl furoate; Methyl 2-furoate;	1						1	2206	2225	2660	Methyl furoate		Methyl furoate; Methyl 2-furoate;
2208	2662	Methyl 2-hydroxyacetate	Methyl glycolate; Methyl 2-hydroxyacetate	1						1	2208	2227	2662	Methyl 2-hydroxyacetate		Methyl glycolate; Methyl 2-hydroxyacetate
2210	2664	Methyl hexanethioate	Methyl hexanethioate; S-Methyl hexanethioate;	1						1	2210	2229	2664	Methyl hexanethioate		Methyl hexanethioate; S-Methyl hexanethioate;
2211	2665	Methyl hexanoate	Methyl hexanoate; Methyl caproate;	1						1	2211	2230	2665	Methyl hexanoate		Methyl hexanoate; Methyl caproate;
2213	2668	Methyl 3-hexenoate	Methyl hexenoate; Methyl 3-hexenoate;	1						1	2213	2232	2668	Methyl trans-3-hexenoate	Methyl 3-hexenoate	Methyl hexenoate; Methyl 3-hexenoate;
2214	2669	Methyl cis-3-hexenoate	Methyl hexenoate; Methyl cis-3-hexenoate	1						1	2214	2233	2669	Methyl cis-3-hexenoate		Methyl hexenoate; Methyl cis-3-hexenoate
2216	2672	Methyl hydroxydecanoate	Methyl hydroxydecanoate; Methyl 5-hydroxydecanoate	1						1	2216	2235	2672	Methyl hydroxydecanoate		Methyl hydroxydecanoate; Methyl 5-hydroxydecanoate
2219	2677	Methyl isobutyrate	Methyl isobutyrate; Methyl 2-methylpropanoate;	1						1	2219	2238	2677	Methyl isobutyrate		Methyl isobutyrate; Methyl 2-methylpropanoate;
2222	2682	Methyl isovalerate	Methyl isovalerate; Methyl 3-methylbutanoate;	1						1	2222	2241	2682	Methyl isovalerate		Methyl isovalerate; Methyl 3-methylbutanoate;
2224	2684	Methyl lactate	Methyl lactate; Methyl 2-hydroxypropionate	1						1	2224	2243	2684	Methyl lactate		Methyl lactate; Methyl 2-hydroxypropionate
2225	2686	Methyl levulinate	Methyl levulinate; Methyl 4-oxopentanoate	1						1	2225	2244	2686	Methyl levulinate		Methyl levulinate; Methyl 4-oxopentanoate
2242	2707	Methyl methylpentanoate	Methyl methylpentanoate; Methyl 2-methylpentanoate;	1						1	2242	2261	2707	Methyl methylpentanoate		Methyl methylpentanoate; Methyl 2-methylpentanoate;
2263	2733	Methyl octyl sulfide	Methyl octyl sulfide; 1-(methylthio)octane	1						1	2263	2282	2733	Methyl octyl sulfide		Methyl octyl sulfide; 1-(methylthio)octane
2266	2738	Methyl oxohexanoate	Methyl oxohexanoate; Methyl 3-oxohexanoate	1						1	2266	2285	2738	Methyl oxohexanoate		Methyl oxohexanoate; Methyl 3-oxohexanoate
2267	2739	Methyl oxomethylpentanoate	Methyl oxomethylpentanoate; Methyl 2-oxo-3-methylpentanoate;	1						1	2267	2286	2739	Methyl oxomethylpentanoate		Methyl oxomethylpentanoate; Methyl 2-oxo-3-methylpentanoate;
2289	2763	Methyl pyruvate	Methyl pyruvate; Methyl oxopropionate; Methyl 2-oxopropionate	1						1	2289	2308	2763	Methyl pyruvate		Methyl pyruvate; Methyl oxopropionate; Methyl 2-oxopropionate
2306	2781	Methyl valerate	Methyl valerate; Methyl pentanoate;	1						1	2306	2325	2781	Methyl valerate		Methyl valerate; Methyl pentanoate;
2313	2788	Methylallyl hexanoate	Methylallyl hexanoate; 2-Methylallyl hexanoate	1						1	2313	2332	2788	Methylallyl hexanoate		Methylallyl hexanoate; 2-Methylallyl hexanoate
2314	2789	Methylallyl isobutyrate	Methylallyl isobutyrate; 2-Methylallyl isobutyrate	1						1	2314	2333	2789	Methylallyl isobutyrate		Methylallyl isobutyrate; 2-Methylallyl isobutyrate
2353	2831	3-Methyl-2-butyl butyrate	Methylbutyl butyrate; 3-Methyl-2-butyl butyrate	1						1	2353	2372	2831	Methylbutyl butyrate	3-Methyl-2-butyl butyrate	Methylbutyl butyrate; 3-Methyl-2-butyl butyrate
2359	2837	Methylbutyl hexanoate	Methylbutyl hexanoate; 2-Methylbutyl hexanoate	1						1	2359	2378	2837	Methylbutyl hexanoate		Methylbutyl hexanoate; 2-Methylbutyl hexanoate
2361	2839	Methylbutyl lactate	Methylbutyl lactate; 2-Methylbutyl lactate	1						1	2361	2380	2839	Methylbutyl lactate		Methylbutyl lactate; 2-Methylbutyl lactate
2364	2842	Methylbutyl methylbutyrate	Methylbutyl methylbutyrate; 2-Methylbutyl 2-methylbutanoate;	1						1	2364	2383	2842	Methylbutyl methylbutyrate		Methylbutyl methylbutyrate; 2-Methylbutyl 2-methylbutanoate;
2378	2857	Methylcrotonic acid	Methylcrotonic acid; 3-Methylcrotonic acid; Senecioic acid;	1						1	2378	2396	2857	Methylcrotonic acid		Methylcrotonic acid; 3-Methylcrotonic acid; Senecioic acid;
2385	2864	Methylcyclohexenone	Methylcyclohexenone; 3-Methyl-2-cyclohexen-1-one;	1						1	2385	2403	2864	Methylcyclohexenone		Methylcyclohexenone; 3-Methyl-2-cyclohexen-1-one;
2387	2867	Methylcyclopentenolone butyrate	Methylcyclopentenolone butyrate; Cyclotene butyrate	1						1	2387	2405	2867	Methylcyclopentenolone butyrate		Methylcyclopentenolone butyrate; Cyclotene butyrate
2388	2868	Methylcyclopentenolone	Methylcyclopentenolone; Cyclotene; Ketonarome; Corylone; MCP;	1						1	2388	2406	2868	Methylcyclopentenolone		Methylcyclopentenolone; Cyclotene; Ketonarome; Corylone; MCP;
2389	2869	Methylcyclopentenone	Methylcyclopentenone; 1-Methyl-1-cyclopenten-3-one;	1						1	2389	2407	2869	Methylcyclopentenone		Methylcyclopentenone; 1-Methyl-1-cyclopenten-3-one;
2404	2885	2-Methylfuran-3(2H)-one	Methylfuranone; 2-Methylfuran-3(2H)-one	1						1	2404	2422	2885	2-Methylfuran-3(2H)-one		Methylfuranone; 2-Methylfuran-3(2H)-one
2405	2887	5-Methylfuran-3(2H)-one	Methylfuranone; 5-Methylfuran-3(2H)-one	1						1	2405	2423	2887	5-Methylfuran-3(2H)-one		Methylfuranone; 5-Methylfuran-3(2H)-one
2408	2890	Methylfurfural	Methylfurfural; 5-Methylfurfural;	1						1	2408	2426	2890	Methylfurfural		Methylfurfural; 5-Methylfurfural;
2409	2892	Methylfurfuryl alcohol	Methylfurfuryl alcohol; 5-Methylfurfuryl alcohol	1						1	2409	2427	2892	Methylfurfuryl alcohol		Methylfurfuryl alcohol; 5-Methylfurfuryl alcohol
2419	2903	Methylfurylpropanedione	Methylfurylpropanedione; 1-(5-methyl-2-furyl)-1,2-propanedione	1						1	2419	2437	2903	Methylfurylpropanedione		Methylfurylpropanedione; 1-(5-methyl-2-furyl)-1,2-propanedione
2420	2905	Methylfurylpropenal 3-(5-Methyl-2-furyl)prop-2-enal	Methylfurylpropenal 3-(5-Methyl-2-furyl)prop-2-enal	1						1	2420	2438	2905	Methylfurylpropenal 3-(5-Methyl-2-furyl)prop-2-enal		Methylfurylpropenal 3-(5-Methyl-2-furyl)prop-2-enal
2481	2979	Methylnonanedione	Methylnonanedione; 3-Methylnonane-2,4-dione	1						1	2481	2500	2979	Methylnonanedione		Methylnonanedione; 3-Methylnonane-2,4-dione
2509	3010	2-Methyl-2-pentenoic acid	Methylpentenoic acid; 2-Methyl-2-pentenoic acid;	1						1	2509	2528	3010	2-Methyl-2-pentenoic acid		Methylpentenoic acid; 2-Methyl-2-pentenoic acid;
2522	3024	Methylphenylbutenone	Methylphenylbutenone; 3-Methyl-4-phenyl-3-buten-2-one;	1						1	2522	2541	3024	Methylphenylbutenone		Methylphenylbutenone; 3-Methyl-4-phenyl-3-buten-2-one;
2529	3032	4-Methyl-1-phenyl-2-pentanone	Methylphenylpentanone; 4-Methyl-1-phenyl-2-pentanone;	1						1	2529	2548	3032	4-Methyl-1-phenyl-2-pentanone		Methylphenylpentanone; 4-Methyl-1-phenyl-2-pentanone;
2560	3064	2-Methyltetrahydrofuran-3-one	Methyltetrahydrofuranone; 2-Methyltetrahydrofuran-3-one;	1						1	2560	2579	3064	2-Methyltetrahydrofuran-3-one		Methyltetrahydrofuranone; 2-Methyltetrahydrofuran-3-one;
2595	3106	Methylthiomethyl hexanoate	Methylthiomethyl hexanoate;	1						1	2595	2614	3106	Methylthiomethyl hexanoate		Methylthiomethyl hexanoate;
2608	3122	o-Methylthiophenol	Methylthiophenol; o-Methylthiophenol; Thioguaiacol;	1						1	2608	2627	3122	o-Methylthiophenol		Methylthiophenol; o-Methylthiophenol; Thioguaiacol;
2613	3128	Methylthiopropyl hexanoate	Methylthiopropyl hexanoate; 3-(Methylthio)propyl hexanoate	1						1	2613	2632	3128	Methylthiopropyl hexanoate		Methylthiopropyl hexanoate; 3-(Methylthio)propyl hexanoate
2649	3175	Naphthyl butyl ether	Naphthyl butyl ether; beta-Naphthyl butyl ether	1						1	2649	2668	3175	Naphthyl butyl ether		Naphthyl butyl ether; beta-Naphthyl butyl ether
2651	3177	Naphthyl isobutyl ether	Naphthyl isobutyl ether; beta-Naphthyl isobutyl ether;	1						1	2651	2670	3177	Naphthyl isobutyl ether		Naphthyl isobutyl ether; beta-Naphthyl isobutyl ether;
2752	3299	Ocimenyl acetate	Ocimenyl acetate; 8-Ocimenyl acetate	1						1	2752	2772	3299	[2,6-dimethylocta-2,5,7-trienyl] acetate	Ocimenyl acetate	Ocimenyl acetate; 8-Ocimenyl acetate
2776	3328	Octane-4,5-dione	Octanedione; Octane-4,5-dione; 4,5-Octanedione	1						1	2776	2796	3328	Octane-4,5-dione		Octanedione; Octane-4,5-dione; 4,5-Octanedione
2807	3364	2-Octen-4-one	Octenone; 2-Octen-4-one;	1						1	2807	2827	3364	2-Octen-4-one		Octenone; 2-Octen-4-one;
2815	3372	(Z)-5-Octenyl acetate	Octenyl acetate; (Z)-5-Octenyl acetate	1						1	2815	2835	3372	(Z)-5-Octenyl acetate		Octenyl acetate; (Z)-5-Octenyl acetate
2819	3376	(Z)-5-Octenyl propionate	Octenyl propionate; (Z)-5-Octenyl propionate;	1						1	2819	2839	3376	(Z)-5-Octenyl propionate		Octenyl propionate; (Z)-5-Octenyl propionate;
2825	3382	Octyl acetoacetate	Octyl acetoacetate; Octyl 3-oxobutanoate	1						1	2825	2845	3382	Octyl acetoacetate		Octyl acetoacetate; Octyl 3-oxobutanoate
2857	3416	Oxobutyric acid	Oxobutyric acid; 2-Oxobutyric acid;	1						1	2857	2877	3416	Oxobutyric acid		Oxobutyric acid; 2-Oxobutyric acid;
2862	3423	Oxoethylbutanolide	Oxoethylbutanolide; 3-ethyl-2-oxo-4-butanolide	1						1	2862	2882	3423	Oxoethylbutanolide		Oxoethylbutanolide; 3-ethyl-2-oxo-4-butanolide
2867	3430	Oxophenylpropionic acid	Oxophenylpropionic acid; Phenylpyruvic acid	1						1	2867	2887	3430	Oxophenylpropionic acid		Oxophenylpropionic acid; Phenylpyruvic acid
2893	3460	3-Pentanone	Pentanone; 3-Pentanone; Pentan-3-one	1						1	2893	2913	3460	3-Pentanone		Pentanone; 3-Pentanone; Pentan-3-one
2895	3462	Pentanoylthiophene	Pentanoylthiophene; 2-Pentanoylthiophene	1						1	2895	2915	3462	Pentanoylthiophene		Pentanoylthiophene; 2-Pentanoylthiophene
2898	3465	4-Pentenoic acid	Pentenoic acid; 4-Pentenoic acid;	1						1	2898	2918	3465	4-Pentenoic acid		Pentenoic acid; 4-Pentenoic acid;
2899	3466	2-Pentenoic acid	Pentenoic acid; 2-Pentenoic acid; Pent-2-enoic acid	1						1	2899	2919	3466	2-Pentenoic acid		Pentenoic acid; 2-Pentenoic acid; Pent-2-enoic acid
2948	3518	Phenethyl furoate	Phenethyl furoate; Phenethyl 2-furoate; 2-Phenethyl 2-furoate	1						1	2948	2968	3518	Phenethyl furoate		Phenethyl furoate; Phenethyl 2-furoate; 2-Phenethyl 2-furoate
2965	3535	Phenethyl valerate	Phenethyl valerate; 2-Phenethyl valerate; Phenethyl pentanoate	1						1	2965	2985	3535	Phenethyl valerate		Phenethyl valerate; 2-Phenethyl valerate; Phenethyl pentanoate
3034	3610	Phenylpropyl isovalerate	Phenylpropyl isovalerate; 3-Phenylpropyl isovalerate;	1						1	3034	3055	3610	Phenylpropyl isovalerate		Phenylpropyl isovalerate; 3-Phenylpropyl isovalerate;
3041	3617	Phenylpropyltetrahydrofuran	Phenylpropyltetrahydrofuran;	1						1	3041	3063	3617	Phenylpropyltetrahydrofuran		Phenylpropyltetrahydrofuran;
3056	3637	Piperitenone oxide	Piperitenone oxide;	1						1	3056	3078	3637	Piperitenone oxide		Piperitenone oxide;
3104	3696	Propionylmethylfuran	Propionylmethylfuran; 2-Propionyl-3-methylfuran	1						1	3104	3126	3696	Propionylmethylfuran		Propionylmethylfuran; 2-Propionyl-3-methylfuran
3111	3705	Propyl acetoacetate	Propyl acetoacetate; Propyl 3-oxobutanoate	1						1	3111	3133	3705	Propyl acetoacetate		Propyl acetoacetate; Propyl 3-oxobutanoate
3116	3713	Propyl crotonate	Propyl crotonate; Propyl trans-but-2-enoate	1						1	3116	3138	3713	Propyl crotonate		Propyl crotonate; Propyl trans-but-2-enoate
3117	3714	Propyl cyclohexanepropionate	Propyl cyclohexanepropionate; Propyl 3-cyclohexylpropanoate	1						1	3117	3139	3714	Propyl cyclohexanepropionate		Propyl cyclohexanepropionate; Propyl 3-cyclohexylpropanoate
3123	3723	Propyl furanacrylate	Propyl furanacrylate; Propyl 3-(2-furyl)-2-propenate;	1						1	3123	3145	3723	Propyl furanacrylate		Propyl furanacrylate; Propyl 3-(2-furyl)-2-propenate;
3126	3727	Propyl hexanoate	Propyl hexanoate; Propyl caproate;	1						1	3126	3148	3727	Propyl hexanoate		Propyl hexanoate; Propyl caproate;
3128	3731	Propyl isobutyrate	Propyl isobutyrate; Propyl 2-methylpropionate;	1						1	3128	3150	3731	Propyl isobutyrate		Propyl isobutyrate; Propyl 2-methylpropionate;
3129	3732	Propyl isohexanoate	Propyl isohexanoate; Propyl 4-methylpentanoate	1						1	3129	3151	3732	Propyl isohexanoate		Propyl isohexanoate; Propyl 4-methylpentanoate
3131	3734	Propyl lactate	Propyl lactate; Propyl 2-hydroxypropionate	1						1	3131	3153	3734	Propyl lactate		Propyl lactate; Propyl 2-hydroxypropionate
3132	3735	Propyl levulinate	Propyl levulinate; Propyl 4-oxopentanoate	1						1	3132	3154	3735	Propyl levulinate		Propyl levulinate; Propyl 4-oxopentanoate
3133	3736	Propyl mercaptopropionate	Propyl mercaptopropionate; Propyl 2-mercaptopropionate	1						1	3133	3155	3736	Propyl mercaptopropionate		Propyl mercaptopropionate; Propyl 2-mercaptopropionate
3135	3739	Propyl methylbutyrate	Propyl methylbutyrate; Propyl 2-methylbutyrate	1						1	3135	3157	3739	Propyl methylbutyrate		Propyl methylbutyrate; Propyl 2-methylbutyrate
3144	3750	Propyl pyruvate	Propyl pyruvate; Propyl 2-oxopropanoate	1						1	3144	3166	3750	Propyl pyruvate		Propyl pyruvate; Propyl 2-oxopropanoate
3146	3752	Propyl sorbate	Propyl sorbate; Propyl (E,E)-2,4-hexadienoate	1						1	3146	3168	3752	Propyl sorbate		Propyl sorbate; Propyl (E,E)-2,4-hexadienoate
3148	3754	Propyl valerate	Propyl valerate; Propyl valerianate; Propyl pentanoate;	1						1	3148	3170	3754	Propyl valerate		Propyl valerate; Propyl valerianate; Propyl pentanoate;
3170	3787	Propylthiazolidine	Propylthiazolidine; 2-Propylthiazolidine	1						1	3170	3197	3787	Propylthiazolidine		Propylthiazolidine; 2-Propylthiazolidine
3224	3880	Sotolon	Sotolon; Caramel furanone; 4,5-Dimethyl-3-hydroxy-2(5H)-furanone	1						1	3224	3251	3880	Sotolon		Sotolon; Caramel furanone; 4,5-Dimethyl-3-hydroxy-2(5H)-furanone
3227	3885	Strawberry furanone	Strawberry furanone; Furaneol® (Firmenich)	1						1	3227	3255	3885	Strawberry furanone		Strawberry furanone; Furaneol® (Firmenich)
3281	3955	Tetrahydrofurfuryl alcohol	Tetrahydrofurfuryl alcohol;	1						1	3281	3308	3955	Tetrahydrofurfuryl alcohol		Tetrahydrofurfuryl alcohol;
3282	3956	Tetrahydrofurfuryl butyrate	Tetrahydrofurfuryl butyrate;	1						1	3282	3309	3956	Tetrahydrofurfuryl butyrate		Tetrahydrofurfuryl butyrate;
3286	3960	Tetrahydrofurfuryl propionate	Tetrahydrofurfuryl propionate;	1						1	3286	3313	3960	Tetrahydrofurfuryl propionate		Tetrahydrofurfuryl propionate;
3300	3978	Tetramethylethylcyclohexenone	Tetramethylethylcyclohexenone (mixture of isomers);	1						1	3300	3327	3978	5-ethyl-2,3,4,5(and 3,4,5,6)-tetramethylcyclohexone	Tetramethylethylcyclohexenone	Tetramethylethylcyclohexenone (mixture of isomers);
3309	3995	Thienylmercaptan	Thienylmercaptan; 2-Thienyl mercaptan;	1						1	3309	3338	3995	Thienylmercaptan		Thienylmercaptan; 2-Thienyl mercaptan;
10001	1376	Ethyl 2-methyl-3-pentenoate	Ethyl methylpentenoate; Ethyl 2-methyl-3-pentenoate;	1						1	10001	3539	1376	Ethyl 2-methyl-3-pentenoate		Ethyl methylpentenoate; Ethyl 2-methyl-3-pentenoate;
1384	1676	Glycyrrhizin	Glycyrrhizin, ammoniated (Glycyrrhiza spp.);	0

## Sheet: StCaPi 293 cmpds
test liste 298	test FCA 300	test nb ds FB9-3808	SMILES	chirality	File name (.mol)/new	test FB9-3508	n° FB9-3508	n° FB9-3808 par Part(-1 -2)	n° FB9	pseudo Current name	Previous Current name	name	synonym1	descriptio	formula	mol_wt	cas_no	nature	OCCURRENCE	COMMENT	type	erreurs FB9 selon FLB2929-FB2004 et FB9	erreurs FB9 et modifs FB9-3508	infos dans FB10th	A modifier/modifications	new type 2 identif	part1 descript1	part1 descript2	part1 descript3	part1 descript4	part1 descript5	part1 descript6	part1 descript7	part1 descript8	part1 descript9	part1 descript10	part1 descript11	fruity	sweet	green	floral	weak	fatty	herbaceous	strong	waxy	woody	mild	sulfuraceous
1	4	1	CC(=O)OC\C(=C/C\C=C(/C)\C=C)\C	achiral	cis-2-trans-5-2-6-dimethyloctatrienyl-acetate	1	2752	2772	3299	[2,6-dimethylocta-2,5,7-trienyl] acetate	Ocimenyl acetate	Ocimenyl acetate; 8-Ocimenyl acetate	2,6-Dimethyl-2,5,7-octatriene-1-yI acetate; Piperitanate	green, fruity, pineapple	C12 H18 O2	194.27	197098-61-6	Nature Identical*	(Z,Z)-8-ocimenyl acetate & (E,Z)-8-ocimenyl acetate are found in peppermint oil (Mentha piperita L.)	Note* -at the time of this writing, this material has been assigned an EC Flavis number, but not officially been placed on the EC Register List. The Flavis number is 09.931 JECFA indicates -fruity aroma United States Patent 6,034,268 by Surburg, et al. March 7, 2000 assigned to Haarmann & Reimer GmbH indicates the following for the various isomers: (Ia) (Z3,Z6)-8-Ocimenyl acetate: slightly fresh-…	odorant					unspecified odorant		green	fruity	pineapple								1	0	1	0	0	0	0	0	0	0	0	0
1	2	1	CCCCCC1COC(=O)CO1	achiral	5-pentyl-dioxan-2-one	1	193	194	228	5(or 6)-pentyl-dioxan-2-one	Amyl keto dioxane	Amyl keto dioxane; 2-Amyl-5-(or 6-)keto-1,4-dioxane;	5-(or 6-)Pentyl-1,4-dioxan-2-one;	Fruity, buttery, caramel, winey notes, lactonic, peachy	C9 H16 O3	172.222	65504-96-3	Artificial	Not considered Nature Identical by IOFI	Fischetti (1980) describes this material as having a "caramel-like fruity" aroma and "fruity-lactone taste". Seoul Perfumery Co., Ltd. indicates -fruity, winey, somewhat ethereal odor. Boelens indicates -buttery, coconut-like ... as substitute for delta-decalactone in buttery flavourings (FRM 2001). The Good Scents Co. indicates -fruity winey odor Burdock indicates -a fruity-winy, somewhat ethere…	odorant					unspecified odorant	fruity	buttery	caramellic	winey	lactonic	peach						1	0	0	0	0	0	0	0	0	0	0	0
1	2	1	CCCCC1COC(=O)CO1	achiral	5-butyl-dioxan-2-one	1	417	420	495	5(or 6)-butyl-dioxan-2-one	Butylketodioxane	Butylketodioxane; 2-Butyl-5-(or 6)keto-1,4-dioxane;	5-(or 6)Butyl-1,4-dioxan-2-one;	Fruity, winey, peach-caramellic odor	C8 H14 O3	158.195	65504-45-2	Artificial	Not considered Nature Identical by IOFI	Boelens indicates -lactonic, fruity; somewhat reminiscent of peach, apricot, coconut (FRM 2001). The Good Scents Co. indicates -fruity odor Arctander indicates -strong, fruity odor; winey-caramellic undertone. Sweet-fruity and somewhat pungent-ethereal taste, unless diluted below 30 ppm. Used in Dairy flavors (Butter, Cream), Peach, Apricot, Strawberry, Butterscotch, Walnut, Raisin, Prune flavors…	odorant					odor	fruity	winey	peach	caramellic	odor							1	0	0	0	0	0	0	0	0	0	0	0
1	2	1	CCCCC\C=C\CCC(=O)OCC(C)C	achiral	isobutyl-E-decenoate	1	1795	1812	2163	isobutyl dec-4-enoate	Isobutyl decenoate	Isobutyl decenoate; Isobutyl 4-decenoate	Isobutyl 4-decenoate (no isomer specified)	Fruity, green, pear-pineapple connotation	C14 H26 O2	226.355	106450-11-7	Nature Identical	Plum (fresh)	Used in Pear and Peach and tropical fruit formulations and in Brandy and Liqueur flavors (e.g., Apple, Pear, Plum, Peach). 3011 O H3C O CH3 CH3	odorant					unspecified odorant	fruity	green	pear	pineapple								1	0	1	0	0	0	0	0	0	0	0	0
1	2	1	CCC1(C)CC(=O)C(=C(C)C1C)C	achiral	5-ethyl-2-3-4-5-tetramethylcyclohexone	1	3300	3327	3978	5-ethyl-2,3,4,5(and 3,4,5,6)-tetramethylcyclohexone	Tetramethylethylcyclohexenone	Tetramethylethylcyclohexenone (mixture of isomers);	5-Ethyl-2,3,4,5(and 3,4,5,6)-tetramethyl-2-cyclohexen-1-one;	Caramellic-sugary, creamy, fruity, nut-like odor and taste	C12 H20 O	180.287	17369-60-7	Artificial	#N/A	Boelens indicates -fresh herbal, characteristic honey-like odor & flavor (PMP 2001 & FRM 2001) Burdock indicates: "a warm, caramellic, fruity odor with a pleasant, creamy, caramellic, fruity flavor" (Fenaroli’s Handbook of Flavor Ingredients, Fifth Edition, CRC Press, 2004, p. 1784) Arctander indicates -A warm, caramellic, fruity, slightly spicy or nut like odor. A pleasant, creamy, caramellic, f…	odorant + taste					odor idem taste	caramellic	sugar	creamy	fruity	nutty	odor	taste					1	0	0	0	0	0	0	0	0	0	0	0
1	1	1	CC(=O)CO	achiral	Acetol	1	56	56	58	Acetol		Acetol; 1-Hydroxypropan-2-one	Hydroxyacetone; Acetyl carbinol	Slightly green; Weak sweet somewhat caramellic-winey note	C3 H6 O2	74.079	116-09-6	Nature Identical	Onion (roasted), Wheat bread, Cheese, Chicken (heated), Beef (boiled, cooked), Pork (heated), Beer, Rum, Coffee, Honey, Passion fruit juice (hybrid), Shoyu (fermented soya hydrolysate), Sukiyaki, Licorice	Odor detection threshold = 80,000 -100,000 ppb; Ref: Buttery et al. (1994,1999), Buttery & Ling (1998) in L.J. van Gemert, Compilations of odour threshold values in air & water, Publisher: Boelens Aroma Chemical Information Service, Huizen, The Netherlands, 2003 A Firmenich patent (U.S. No. 3,931,246 January 6, 1976) describes the flavor as: slightly green taste at 50 ppm in sugar syrup. Boelens …	odorant					unspecified odorant	weak	green	sweet	caramellic	winey							0	1	1	0	1	0	0	0	0	0	0	0
1	1	1	CC(=O)COC(C)=O	achiral	Acetonyl-acetate	1	59	60	62	Acetonyl acetate		Acetonyl acetate; 2-Oxopropyl acetate	Acetol acetate, 1-acetoxyacetone. 1-acetoxy-2-propanone	Fermented, sour fruity-buttery, caramellic notes	C5 H8 O3	116.115	592-20-1	Nature identical	Pineapple, Wheat bread, Chicken (heated), Beef (fried), Pork (heated), Cocoa, Coffee, Black tea, Filbert (roasted)	Boelens indicates -fruity, caramellic odor & flavour (PMP 2001) & (FRM 2001) Arctander indicates -Peculiar fruity-buttery, somewhat sour odor. The taste is buttery-vinegar like Possible uses include bread, fermented flavors, nut, fruit, caramel and tea flavors. 74 H3C O CH3 O CH3	odorant					unspecified odorant	fermented	sour	fruity	buttery	caramellic							1	0	0	0	0	0	0	0	0	0	0	0
1	1	1	CC(=O)C1CCCC1=O	achiral	acetylcyclopentanone	1	75	76	80	Acetylcyclopentanone		Acetylcyclopentanone; 2-Acetylcyclopentan-1-one	2-Acetylcyclopentanone	Ketonic with burnt fruity caramellic notes	C7 H10 O2	126.153	1670-46-8	Nature identical	Coffee	Previously assigned Flavis No. 07.144 *Note -COMMISSION DECISION of 26 February 2009 amending Decision 1999/217/EC as regards the EC register of flavouring substances: Deleted from list. Boelens indicates -burnt, slightly fruity, caramel connotations (FRM 2001) Possibly finds use in fruit flavors, caramel and roasted flavors. Isolated from coffee by Costa-Freitas, A. M.; Parreira, C. and Vilas-Bo…	odorant					unspecified odorant	ketonic	burned	fruity	caramellic								1	0	0	0	0	0	0	0	0	0	0	0
1	1	1	CC(=O)C1=C(C)C=C(C)O1	achiral	2-Acetyl-3-5-dimethylfuran	1	77	78	82	2-Acetyl-3,5-dimethylfuran		Acetyldimethylfuran; 2-Acetyl-3,5-dimethylfuran		Balsamic, Nutty, caramellic, somewhat roasted	C8 H10 O2	138.164	22940-86-9	Nature identical	Rum	Boelens indicates -aromatic, somewhat caramellic fruity (FRM 2001) JECFA indicates -Sweet balsamic aroma The Good Scents Co. indicates -sweet balsam Possible uses include nut, caramel, fruit, bread, etc. Useful in Walnut, Roasted Nut (Almond, Pecan, Hazelnut), Chocolate, Bread and Tobacco flavors. May also find use in Coffee and Smoke flavors. Summary of Evaluations Performed by the Joint FAO/WHO…	odorant					unspecified odorant	balsamic	nutty	caramellic	roasted								0	0	0	0	0	0	0	0	0	0	0	0
1	1	1	CC(=O)C1=CC=C(C)O1	achiral	2-Acetyl-5-methylfuran	1	90	91	98	Acetylmethylfuran		Acetylmethylfuran; 2-Acetyl-5-methylfuran;	1-(5-Methyl-2-furyl)-ethanone; Methyl 5-methyl-2-furyl ketone;	Nutty, hay, caramel, coumarin odor	C7 H8 O2	124.137	1193-79-9	Nature Identical	Beer, Burley Tobacco, Cocoa, Coffee, Cooked Beef, Popcorn, Roasted Filbert, Virginia Tobacco, Whiskey.	United States Patent 3,952,024 by Winter, et al. April 20, 1976 assigned to Firmenich describes the flavor as: light burnt taste at 40 ppm in sugar syrup and nutty, starchy taste at 40 ppm in a soluble coffee base. Also a caramel like flavor -Sakaguchi and Shibamoto as quoted in Flament & Yvonne Bessière-Thomas, Coffee flavor chemistry. Wiley and Sons, 2001, p. 238) Bedoukian indicates: A strong,…	odorant					odor	nutty	hay	caramellic	coumarinic	odor							0	0	0	0	0	0	0	0	0	0	0	0
1	1	1	CC(=O)C1=NC(=NC=C1)C	achiral	4-Acetyl-2-methylpyrimidine	1	94	95	102	Acetylmethylpyrimidine		Acetylmethylpyrimidine; 4-Acetyl-2-methylpyrimidine;	Methyl 2-methylpyrimidinyl ketone;	"Grilled" note; roasted, animal, meat-like, sweetish, caramel	C7 H8 N2 O	136.151	67860-38-2	Nature Identical	Cooked Beef	The description provided is that of Ohloff, et.al., as included in Fors review (1983). A Firmenich patent (U.S. No. 4,232,156 November 4, 1980 ) describes it as: roasted, animal, meat-like, sweetish, caramel, nut at 0.5 ppm and as enhancing a meat broth flavoring at 0.15 ppm. A panel of experts declared that the taste of the test cigarettes containing this material possessed more body and more de…	odorant					unspecified odorant	grilled	roasted	animalic	meaty	sweetish	caramellic						0	0	0	0	0	0	0	0	0	0	0	0
1	1	1	CC(=O)C1=NCCCC1	achiral	2-acetyl-3-4-5-6-tetrahydropyridine	1	103	104	117	2-Acetyl-3,4,5,6-tetrahydropyridine		Acetyltetrahydropyridine; 2-Acetyl-3,4,5,6-tetrahydropyridine	1-(3,4,5,6-tetrahydropyridin-2-yl)ethanone	Caramel, bready, popcorn like odor	C7 H11 N O	125.168	27300-27-2	Nature Identical	Popcorn,	Odor threshold = 2 ppb in water. Normally considered as popcorn-like (See Thomas Hofmann and Peter Schieberle, Flavor Contribution and Formation of the Intense Roast-Smelling Odorants 2-Propionyl-1-pyrroline and 2-Propionyltetrahydropyridine in Maillard-Type Reactions, J. Agric. Food Chem. 1998, 46, 2721-2726) and (Ron G. Buttery, Louisa C. Ling, and Don J. Stern, Studies on Popcorn Aroma and Fla…	odorant				IUPAC 1-(2,3,4,5-tetrahydropyridin-6-yl)ethanone	odor	caramellic	bread	popcorn	odor								0	0	0	0	0	0	0	0	0	0	0	0
1	1	1	CCCCCC(=O)SCC=C	achiral	allyl-thiohexanoate	1	111	112	134	Allyl Thiohexanoate		Allyl Thiohexanoate; S-Allyl hexanethioate	Hexanethioic acid, S-2-propenyl ester; S-2-Propenyl hexanethioate	Tropical fruity in dilution; pineapple	C9 H16 O S	172.289	156420-69-8	Artificial	Not considered Nature Identical by IOFI	Note* -at the time of this writing, this material has been assigned an EC Flavis number, but not officially been placed on the EC Register List. The Flavis number is 12.275 JECFA indicates -Fruity, sulphureous aroma Useful in pineapple, passionfruit, tropical fruit, guava, grapefruit in dilution. Primary use is probably vegetable, savory, tropical fruit, pineapple and cheese flavors. Norma use le…	odorant					unspecified odorant	tropical fruit	pineapple										0	0	0	0	0	0	0	0	0	0	0	0
1	1	1	CCCC(=O)OCC=C	achiral	Allyl-butyrate	1	117	118	140	Allyl butanoate		Allyl butanoate; Allyl butyrate;	2-Propen-1-yl butanoate; 2-Propenyl butanoate; 2-Propen-1-yl butyrate; 2-Propenyl butyrate;	Fruity, green, pineapple-apricot-apple like odor; tropical, apple in taste	C7 H12 O2	128.169	2051-78-7	Artificial*	Boursin Cheese; Not considered Nature Identical by IOFI	Mosciano, et. al. report that this material has a "sweet pungent fruity green pineapple, with waxy tropical nuances" odor and a "fruity green tropical with sweet fermented waxy nuances" taste at 10 ppm. Useful in Apple, Apricot, Pineapple, Butter, Peach and Tropical fruit flavors. Oxford (now Frutarom) indicates: Odour Description -Fruity, Green, Pineapple, Sweet, W axy Suggested Uses -Apple, Apr…	odorant + taste					odor diff taste	fruity	green	pineapple	apricot	apple	odor						1	0	1	0	0	0	0	0	0	0	0	0
1	1	1	C=CCOC(=O)CCCC1CCCCC1	achiral	Allyl-cyclohexanebutyrate	1	121	122	145	Allyl cyclohexanebutyrate		Allyl cyclohexanebutyrate; Allyl cyclohexanebutanoate;	2-Propen-1-yl cyclohexanebutyrate; Allyl hexahydrophenylbutyrate; Allyl cyclohexyl-n-butyrate; Allyl 4-cyclohexylbutyrate;	Sweet-fruity, pineapple odor with a pineapple-like taste	C13 H22 O2	210.313	7493-65-4	Artificial	Not considered Nature Identical by IOFI	Seoul Perfumery Co., Ltd. indicates -pineapple-like aroma. Boelens indicates -fruity, slightly fatty; somewhat reminiscent of pineapple odor (PMP 2001); fruity, somewhat fatty; somewhat reminiscent of pineapple flavor (FRM 2001) The Good Scents Co. indicates -fatty fruity pineapple Arctander indicates -Mixed-fruity odor; somewhat fatty; quite tenacious. Fatty pineapple-like taste. This material w…	odorant + taste					odor diff taste	sweet	fruity	pineapple	odor								1	1	0	0	0	0	0	0	0	0	0	0
1	1	1	C=CCOC(=O)CCC1CCCCC1	achiral	Allyl-cyclohexanepropionate	1	123	124	147	Allyl cyclohexanepropionate		Allyl cyclohexanepropionate; Allyl cyclohexanepropanoate;	Allyl cyclohexylpropionate; Allyl beta-Cyclohexylpropionate; 2-Propen-1-yl cyclohexanepropionate; Allyl hexahydrophenylpropionate; Allyl 3-cyclohexylpropionate	Sweet-fruity pineapple-like odor and taste	C12 H20 O2	196.286	2705-87-5	Artificial	Not considered Nature Identical by IOFI	Mosciano, et. al. report that this material has a "sweet, fruity, pineapple, waxy, apple and green" odor and a "fruity, pineapple, waxy, with green sweet apple nuances" taste at 30 ppm. (Perfumer & Flavorist, Vol. 15, May/Jume 1990, p. 51) Symrise indicates -Odor: strong, fruity like pineapple, floral-herbaceous like camomile blossoms Flavor: estery, green, fruity, pineapple Useful in: fruity yel…	odorant + taste					odor idem taste	sweet	fruity	pineapple	odor	taste							1	1	0	0	0	0	0	0	0	0	0	0
1	1	1	C=CCOC(=O)COC1CCCCC1	achiral	allyl-cyclohexyloxyacetate	1	125	126	149	Allyl cyclohexyloxyacetate		Allyl cyclohexyloxyacetate; Cyclogalbaniff (IFF)	Cyclogalbanat® (Symrise); allyl (cyclohexyloxy)acetate; allyl 2-(cyclohexyloxy)acetate	Green, Galbanum, Fruity, Pineapple	C11 H18 O3	198.259	68901-15-5	Artificial	#N/A	IFF indicates: Odor Profile -Green, Galbanum, Fruity, Pineapple Olfactory Description -A bright galbanum, pineapple odored material with green and berry nuances. In United States Patent Application 20030109415 by Kuhn, W alter; et al. (June 12, 2003) this material is described as having "a fruity, pineapple-like odour" Organica Aromatics indicates: Odour Profile -A powerful fruity green note, rem…	odorant	n'existe pas dans FB2004	même CAS pour 149 et 150 dans FB9 ; structure OK pour 149 ; la structure du 150 serait fausse (pas "oxy")	même CAS pour 149 et 150 dans FB10 ; existence douteuse pour n°150 Allyl cyclohexyloxypropionate pas dans les autres bases, confusion avec n° 147 CAS 2705-87-5(?) ; ne pas prendre en compte 150 pour l'analyse structurale; autres bases Allyl cyclohexylpropionate (pas "oxy")		unspecified odorant	green	galbanum	fruity	pineapple								1	0	1	0	0	0	0	0	0	0	0	0
1	1	1	C=CCOC(=O)CCOC1CCCCC1	achiral	allyl-cyclohexyloxypropionate	1	126	127	150	Allyl cyclohexyloxypropionate		Allyl cyclohexyloxypropionate; allyl 3-(cyclohexyloxy)propanoate		Fruity, pineapple, green-herbal	C12 H20 O3	212.285	68901-15-5	Artificial	#N/A	Used in various pineapple, tropical, berry and other fruit flavors, 196 NH2 OH S CH2 O	odorant	n'existe pas dans FB2004	même CAS pour 149 et 150 dans FB9 ; structure OK pour 149 ; la structure du 150 serait fausse (pas "oxy")	même CAS pour 149 et 150 dans FB10 ; existence douteuse pour n°150 Allyl cyclohexyloxypropionate pas dans les autres bases, confusion avec n° 147 CAS 2705-87-5(?) ; ne pas prendre en compte 150 pour l'analyse structurale; autres bases Allyl cyclohexylpropionate (pas "oxy")		unspecified odorant	fruity	pineapple	green	herbal								1	0	1	0	0	0	0	0	0	0	0	0
1	1	1	C=CCOC(=O)C1=CC=CO1	achiral	Allyl-2-furoate	1	130	131	156	Allyl furoate		Allyl furoate; Allyl 2-furoate;	Allyl furan-2-carboxylate; Allyl pyromucate; 2-Propenyl 2-furoate; 2-Propenyl furan-2-carboxylate;	Caramellic, fruity, coffee odor; pineapple, strawberry taste	C8 H8 O3	152.147	4208-49-5	Nature Identical	Cooked Beef, Soy Sauce (fermented).	Interchim describes the odor/flavor properties as Fruity, pineapple odor, garlic taste, used in pineapple, caramel, coffee. Seoul Perfumery Co., Ltd. indicates -caramellic fruity odor and caramel, fruity, jam flavor notes. Fischetti (1980) describes this material as having a "fruity, pineapple, coffee odor" and a "garlic" taste. Boelens indicates -fruity, aromatic, burnt caramellic (FRM 2001) The…	odorant + taste					odor diff taste	caramellic	fruity	coffee	odor								1	0	0	0	0	0	0	0	0	0	0	0
1	1	1	CCCCCCC(=O)OCC=C	achiral	Allyl-heptanoate	1	131	132	157	Allyl heptanoate		Allyl heptanoate;	Allyl heptylate; Allyl heptoate; Allyl oenanthate;	Sweet, fruity, banana-pineapple-apple odor; Brandy-peach-pineapple taste	C10 H18 O2	170.249	142-19-8	Artificial*	Mushroom; Not considered Nature Identical by IOFI	Boelens indicates -green, sweet fruity, pineapple-, pear-, banana-like; vinous waxy tropical nuance; (10 ppm) (FRM 2001) Interchim describes the odor/flavor properties as "fruity". Bedoukian has indicated: A fruity, sweet, banana with a heavy vinous quality. The Good Scents Co. indicates -sweet pineapple fruity waxy banana fusel cognac Seoul Perfumery Co., Ltd. indicates -characteristic wine-like…	odorant + taste					odor diff taste	sweet	fruity	banana	pineapple	apple	odor						1	1	0	0	0	0	0	0	0	0	0	0
1	1	1	CCCCCC(=O)OCC=C	achiral	Allyl-hexanoate	1	132	133	158	Allyl hexanoate		Allyl hexanoate; Allyl caproate;	2-Propenyl hexanoate; 2-Propenyl caproate; 2-Propen-1-yl hexanoate; 2-Propen-1-yl caproate;	Fatty, fruity, winey-pineapple like odor and taste	C9 H16 O2	156.222	123-68-2	Nature Identical	Baked Potato, Boursin Cheese	Mosciano, et. al. (1993), have described the organoleptic properties of a natural sample as follows: Odor as "Sweet, fruity,estry, juicy, caproate-like, pineapple" and taste as "Sweet, fresh, juicy pineapple and fruity" at 10 ppm. (Perfumer & Flavorist, vol. 18, March/April 1993, p. 38) Boelens indicates -fatty-fruity, characteristic of fresh pineapple, rum & arak (FRM 2001) Klaus Herbrand, Franz…	odorant + taste					odor idem taste	fatty	fruity	winey	pineapple	odor	taste						1	0	0	0	0	1	0	0	0	0	0	0
1	1	1	CC1=CCCC(C)(C)C1\\C=C\\C(=O)CCC=C	achiral	allyl-alpha-Ionone	1	133	134	159	Allyl ionone		Allyl ionone; Allyl alpha-Ionone; alpha-Allylionone;	1-(2,6,6-Trimethyl-2-cyclohexene-1-yl)-1,6-heptadien-3-one; Butenyl alpha-Cyclocitrylidenemethyl ketone; Cetone V (GIV); Allyl cyclocitrylidenemethyl butenyl ketone; Hexalon (IFF);	Sweet, woody-fruity; berry and pineapple-like	C16 H24 O	232.361	79-78-7	Artificial	Not considered Nature Identical by IOFI	Allured's Perfumer's Compendium (1996) & The IFF Perfumers Compendium describes this material as "an ionone product having exceptional rich pineapple quality with natural oily, waxy undertones". Givaudan describes this as: Fruity, Floral-Green, Woody, Powerful; Cetone V has many facets to its character and thus has many uses. It blends very well with ionones, citrus notes, lavender, fruity, woody…	odorant					unspecified odorant	sweet	woody	fruity	berry	pineapple							1	1	0	0	0	0	0	0	0	1	0	0
1	1	1	CC(C)CCOCC(=O)OCC=C	achiral	allyl-isoamyloxyacetate	1	134	135	160	Allyl isoamyloxyacetate		Allyl isoamyloxyacetate; Allyl amyl glycolate (so-called)	allyl 2-(isopentyloxy)acetate; allyl (3-methylbutoxy)acetate;	Herbaceous, strong green note, galbanum fruity (apple, pineapple)	C10 H18 O3	186.248	67634-00-8	Nature Identical?	Moellhausen indicates this is found in Galbanum	This is the primary isomer (~76%) in commercial Allyl amyl glycolate (so-called). Moellhausen indicates: Organoleptic note -herbaceous, strong green note, galbanum fruty (apple, ananas) IFF indicates: Odor Profile -Fruity, Green, Galbanum, Pineapple Olfactory Description -Strong, Fruity, galbanum with a pineapple modification. Adds a modern sparkle to any fragrance Quest has indicated: Fruity pin…	odorant					unspecified odorant	herbaceous	strong	green	galbanum	fruity	apple	pineapple					1	0	1	0	0	0	1	1	0	0	0	0
1	1	1	CC(C)CCC(=O)OCC=C	achiral	allyl-isohexanoate	1	136	137	162	Allyl isohexanoate		Allyl isohexanoate; allyl 4-methylpentanoate		Fatty-fruity, pineapple with some apple notes	C9 H16 O2	156.222		Artificial	#N/A	Useful in fruit flavors: Apple, Apricot, Pineapple etc. 214 N H2C C S	odorant					unspecified odorant	fatty	fruity	pineapple	apple								1	0	0	0	0	1	0	0	0	0	0	0
1	1	1	CCC(C)C(=O)OCC=C	achiral	allyl-methylbutyrate	1	146	147	172	Allyl methylbutyrate		Allyl methylbutyrate; allyl 2-methylbutyrate	allyl 2-methylbutanoate	Fruity, pineapple, green tropical , sweet fermented oily-waxy	C8 H14 O2	142.196	93963-13-4	Artificial	#N/A	Fruity pineapple green tropical with sweet fermented oily-waxy nuances, Useful in Apple, Apricot, Pineapple, Butter, Peach and Tropical fruit flavors. 230 O CH2 S H3C O	odorant					unspecified odorant	fruity	pineapple	green tropical fruit	sweet	fermented	oily	waxy					1	1	0	0	0	0	0	0	1	0	0	0
1	1	1	CSCCC(=O)OCC=C	achiral	allyl-methylthiopropionate	1	147	148	173	Allyl methylthiopropionate		Allyl methylthiopropionate; Allyl 3-(methylthio)propionate	Allyl 3-(methylthio)propanoate	Powerful tropical fruity, pineapple in dilution	C7 H12 O2 S	160.235		Artificial	#N/A	Powerful tropical fruity, pineapple in dilution. Used in pineapple & orther fruity flavors 231 O O CH3CH2	odorant					unspecified odorant	strong	tropical fruit	pineapple									0	0	0	0	0	0	0	1	0	0	0	0
1	1	1	CCCCCCCCC(=O)OCC=C	achiral	Allyl-nonanoate	1	148	149	174	Allyl nonanoate		Allyl nonanoate; Allyl pelargonate;	2-Propenyl nonanoate; 2-Propenyl pelargonate; 2-Propenyl nonylate; Allyl nonylate;	Fatty, fruity, winey, cognac-like with pineapple-nutty notes	C12 H22 O2	198.302	7493-72-3	Artificial	Not considered Nature Identical by IOFI	Boelens indicates -sweet, waxy fruity; winey, cognac; with a creamy, berry nuance (FRM 2001) Seoul Perfumery Co., Ltd. indicates -fruity, cognac, pineapple aroma with sweet, waxy, fruity, wine-like flavor notes. The Good Scents Co. indicates -sweet waxy fruity wine creamy vinous pineapple Arctander indicates -Fruity -winey, somewhat fatty-oily odor, resembling twine residue, cognac residue; trace…	odorant					unspecified odorant	fatty	fruity	winey	cognac	pineapple	nutty						1	0	0	0	0	1	0	0	0	0	0	0
1	1	1	CCCCCCCC(=O)OCC=C	achiral	Allyl-octanoate	1	149	150	175	Allyl octanoate		Allyl octanoate; Allyl caprylate;	Allyl octylate; 2-Propenyl octanoate; 2-Propenyl octylate;	Fatty, fruity, pineapple, winey with apple-banana notes	C11 H20 O2	184.275	4230-97-1	Artificial*	Boursin Cheese; Not considered Nature Identical by IOFI	Klaus Herbrand, Franz J. Hammerschmidt, Stefan Brennecke, Margit Liebig, Gerd Lösing, Claus Oliver Schmidt, Ian Gatfield, Gerhard Krammer, and Heinz-Jürgen Bertram, Identification of Allyl Esters in Garlic Cheese, J. Agric. Food Chem., 55 (19), 7874–7878 (2007) describe the odor as "heavy fruity, soapy, slightly pineapple, wine character, fatty, waxy, over-ripe" Oxford (now Frutarom) indicates: O…	odorant					unspecified odorant	fatty	fruity	pineapple	winey	apple	banana						1	0	0	0	0	1	0	0	0	0	0	0
1	1	1	CCCCC(=O)OCC=C	achiral	allyl-pentanoate	1	150	151	176	Allyl pentanoate		Allyl pentanoate; Allyl valerate	2-Propenyl pentanoate	Fruity, apple, fermented winey, pineapple	C8 H14 O2	142.196	6321-45-5	Artificial	Not considered Nature Identical by IOFI; Darrow cultivar of Highbush blueberry fruit	Boelens indicates -fruity, slightly fatty, pineapple connotation, rum note odor (PMP 2001) Used in Pineapple, Peach, Apricot, Apple, Tropical Fruit Punch, Rum and Liqueur flavors. 236 O O CH2O	odorant					unspecified odorant	fruity	apple	fermented	winey	pineapple							1	0	0	0	0	0	0	0	0	0	0	0
1	1	1	C=CCOC(=O)COC1=CC=CC=C1	achiral	Allyl-Phenoxyacetate	1	151	152	177	Allyl phenoxyacetate		Allyl phenoxyacetate; 2-Propenyl phenoxyacetate;	Phenoxyacetic acid, allyl ester; Acetate PA;	Sweet, fruity, honey-pineapple like odor and taste	C11 H12 O3	192.211	7493-74-5	Artificial	Not considered Nature Identical by IOFI	Givaudan describes this as: Fruity, Pineapple-Like, Fresh, Green; Acetate PA has a fruity, pineapple and floral-green, galbanum character. It is exceptionally diffusive and long lasting. Boelens indicates -sweet, pineapple, honey (FRM 2001) Symrise indicates: Odor: green, sweet, herbal-fruity, reminiscent of camomile with nuances of honey, galbanum and pineapple, very strong Flavor Description: s…	odorant + taste					odor idem taste	sweet	fruity	honey	pineapple	odor	taste						1	1	0	0	0	0	0	0	0	0	0	0
1	1	1	C=CCOC(=O)CC1=CC=CC=C1	achiral	Allyl-Phenylacetate	1	152	153	178	Allyl phenylacetate	2-Propenyl phenylacetate	Allyl phenylacetate; 2-Propenyl phenylacetate;	Allyl alpha-Toluate; Phenylacetic acid, allyl ester;	Sweet, honey-pineapple like odor and taste	C11 H12 O2	176.212	1797-74-6	Artificial	Not considered Nature Identical by IOFI	Boelens indicates -honey, fruity, pineapple-like (FRM 2001) Interchim describes the odor/flavor properties as Fruity, honey, pineapple odor, pineapple taste. The Good Scents Co. indicates -honey fruity rum Burdock indicates -sweet honey-like, but faint odor and sweet fruity undertones (Fenaroli’s Handbook of Flavor Ingredients, Fifth Edition, Wiley, 2004, p. 79) Arctander indicates -Sweet honey l…	odorant + taste					odor idem taste	sweet	honey	pineapple	odor	taste							0	1	0	0	0	0	0	0	0	0	0	0
1	1	1	C\\C=C\\C=C\\C(=O)OCC=C	achiral	Allyl-2-4-hexadienoate	1	160	161	187	Allyl sorbate		Allyl sorbate; Allyl 2,4-hexadienoate;	2,4-Hexadienoic acid, allyl ester; 2-Propenyl 2,4-hexadienoate; Sorbic acid, allyl ester;	Sweet, sharp, pineapple-melon, fruity odor & taste	C9 H12 O2	152.19	7493-75-6	Artificial	Not considered Nature Identical by IOFI	Boelens indicates -strongly fruity, somewhat burnt, herbal (PMP 2001); fresh fruity, somewhat green flavor (FRM 2001) Seoul Perfumery Co., Ltd. indicates -fruity, pineapple like odor. The Good Scents Co. indicates -fruity pineapple Burdock indicates -a fruital pineapple like odor (Fenaroli’s Handbook of Flavor Ingredients, Fifth Edition, CRC Press, 2004, p. 61) Arctander indicates -Pungent-fruity…	odorant + taste					odor idem taste	sweet	sharp	pineapple	melon	fruity	odor	taste					1	1	0	0	0	0	0	0	0	0	0	0
1	1	1	C=CCCCCCCCCC(=O)OCC=C	achiral	Allyl-10-undecenoate	1	164	165	191	Allyl undecenoate		Allyl undecenoate; Allyl 10-undecenoate;	2-Propenyl 10-undecenoate; Allyl undecylenate;	Sweet, fatty, coconut-pineapple like, nutty note	C14 H24 O2	224.339	7493-76-7	Artificial	Not considered Nature Identical by IOFI	Seoul Perfumery Co., Ltd. indicates -fruity aroma suggestive of pineapple. Mosciano indicates -Odor: @ 1.0 percent. Powdery, fatty coconut, waxy and dairy-like with a slight fruity pineapple nuance. Taste: @ from 2.5-10 PPM. Powdery, dry waxy with a slight floral finish. Possible applications: Milk, cheese and dairy nuances, pineapple, coconut and lamb. (Perfumer & Flavorist, Vol. 30, No. 6, p. 3…	odorant					unspecified odorant	sweet	fatty	coconut	pineapple	nutty							0	1	0	0	0	1	0	0	0	0	0	0
1	1	1	CCCCCOC(=O)C1=CC=CO1	achiral	Amyl-furoate	1	186	187	221	Amyl furoate		Amyl furoate; Amyl 2-furoate; Pentyl 2-furoate;	Pentyl furan-2-carboxylate; Amyl furan-2-carboxylate;	Sweet, fruity, caramellic, herbaceous, winey, fermented odor & flavor	C10 H14 O3	182.216	1334-82-3	Artificial	#N/A	Bedoukian has described the odor as "fruity, somewhat herbaceous odor" and "A fruity, herbaceous odor with a hint of anise". Boelens indicates -fruity, burnt caramellic, somewhat herbaceous odor (PMP 2001); fruity, burnt caramellic flavor (FRM 2001) Interchim describes the odor/flavor properties as Fruity, caramel odor, fermented taste, used in apricot, peach, rum. Seoul Perfumery Co., Ltd. indic…	odorant					odor idem flavor	sweet	fruity	caramellic	herbaceous	winey	fermented	odor	flavor				1	1	0	0	0	0	1	0	0	0	0	0
1	1	1	CCCCCOC(=O)CCCCC	achiral	Amyl-hexanoate	1	188	189	223	Amyl hexanoate		Amyl hexanoate; Amyl caproate; Pentyl hexanoate;	n-Pentyl hexanoate; n-Pentyl caproate;	Green fruity waxy odor with apple, pineapple and pear notes	C11 H22 O2	186.291	540-07-8	Nature Identical	Apple, Grape, Grape Brandy, Pineapple, Plum, Rum, Wine.	Interchim describes the odor/flavor properties as Green, fruity, apple-like odor. Pineapple taste. Boelens indicates -green, waxy, fruity, slightly fatty, fermented; pineapple and apple notes odor & flavor (PMP 2001) & (FRM 2001) Seoul Perfumery Co., Ltd. indicates -pineapple, Green, fruity, apple-like odor. Pineapple taste. The Good Scents Co. indicates -sweet green fruity estry pineapple apple …	odorant					odor	green	fruity	waxy	odor	apple	pineapple	pear					1	0	1	0	0	0	0	0	1	0	0	0
1	1	1	CCCCCOC(=O)C(C)O	achiral	amyl-lactate	1	194	196	229	Amyl lactate		Amyl lactate; Pentyl lactate;	Pentyl 2-hydroxypropanoate	Fruity, slightly caramellic, milky	C8 H16 O3	160.211	6382-06-5	Nature Identical	Malt whisky, White wine	Boelens indicates -fruity, slightly caramallic, burnt (FRM 2001) Possibly used in Milk, Butter, Butterscotch, Caramel, Chocolate, Coconut, Toffee, Yogurt, Cheese and as a modifier in Fruit flavors. 311 O CH3 O H3C O	odorant					unspecified odorant	fruity	weak	caramellic	milky								1	0	0	0	1	0	0	0	0	0	0	0
1	1	1	CCCCCOC(=O)CCC(C)=O	achiral	amyl-levulinate	1	195	197	230	Amyl levulinate		Amyl levulinate; pentyl 4-oxopentanoate		Oily-caramellic, winey-fruity	C10 H18 O3	186.248	20279-49-6	Nature Identical	Chenopodium ambrosioides	Possible uses include various fruit flavors. 312 S S H3C CH3	odorant					unspecified odorant	oily	caramellic	winey	fruity								1	0	0	0	0	0	0	0	0	0	0	0
1	1	1	CCCCCOC(=O)CC	achiral	Amyl-propionate	1	200	202	237	Amyl propionate		Amyl propionate; Pentyl propionate		Sweet, fruity, banana, apple and pineapple; mixed fruit tropical note	C8 H16 O2	144.211	624-54-4	Nature identical	Apple, Banana, Muscat grape, Gruyere de comte cheese, Cocoa, Rose apple, Sesame seed (roasted)	Boelens indicates -mild fruity, somewhat ethereal; apple-& banana-like odor (PMP 2001); mild fruity flavor (FRM 2001) Vigon indicates -fruity, apricot-pineapple The Good Scents Co. indicates -pineapple apricot sweet fruity odor Cameo chemicals indicates -an apple-like odor Used in Apricot, Apple, Banana, Cherry, Grape, Peach, Pineapple, Raspberry, Plum, Rum, Strawberry and Liqueur flavors. 320 O …	odorant					unspecified odorant	sweet	fruity	banana	apple	pineapple	mixed fruit	tropical fruit					1	1	0	0	0	0	0	0	0	0	0	0
1	1	1	C\\C=C(\\C)C(O)=O	achiral	Angelic-acid	1	213	215	251	Angelic acid		Angelic acid; cis-2-Methylbut-2-enoic acid	2-Methylbut-2(cis)-enoic acid	Spicy, caramellic odor; herbaceous somewhat celery like taste	C5 H8 O2	100.116	565-63-9	Nature identical	Celery, Roman Chamomille oil	Previously assigned Flavis No. 08.128 *Note -COMMISSION DECISION of 26 February 2009 amending Decision 1999/217/EC as regards the EC register of flavouring substances: Deleted from list. The CAS number is from Volatile Compounds in Food Database, (VCF 2000), BACIS Holland Boelens indicates -sour, herbaceous on dilution, celery, chamomile flavor (FRM 2001) The Good Scents Co. indicates -spicy odor…	odorant + taste					odor diff taste	spicy	caramellic	odor									0	0	0	0	0	0	0	0	0	0	0	0
1	1	1	C(SSCC1=CC=CC=C1)C2=CC=CC=C2	achiral	Benzyl-disulfide	1	265	268	313	Benzyl disulfide		Benzyl disulfide; Dibenzyl disulfide; 1,2-dibenzyldisulfane	Diphenylmethyl disulfide; [(benzyldithio)methyl]benzene	Harsh, burnt-caramellic, earthy, green sulfurous odor	C14 H14 S2	246.393	150-60-7	Nature Identical	Cocoa, Onion	Boelens indicates -aromatic, sulphurous; somewhat alliaceous flavor (FRM 2001) The Aldrich catalog describes the odor of this material as smoky, burnt, earthy, green; (also as green; smoky; earthy) The Good Scents Co. indicates -smoky burnt earthy green caramel odor Fischetti (1980) describes the material as having a "burnt-sugar odor and taste". Also indicated as: "burnt caramellic" odour (FAO d…	odorant					odor	harsh	burned	caramellic	earthy	green	sulfuraceous	odor					0	0	1	0	0	0	0	0	0	0	0	1
1	1	1	CCCCCC(=O)OCC1=CC=CC=C1	achiral	Benzyl-hexanoate	1	270	273	318	Benzyl hexanoate		Benzyl hexanoate; Benzyl caproate		Sweet fruity, with pineapple, tropical, green, floral, apricot, peach note	C13 H18 O2	206.281	6938-45-0	Nature Identical	Yellow passion fruit & juice	Mosciano indicates -Odor: @ 1.0 percent. Sweet, chemical fruity and slightly lactonic, pineapple and slightly tropical. Taste: @ 5.0 PPM. Sweet, tropical, ripe fruity pineapple with a candy nuance. Possible applications: Tropical nuances, pineapple and passion fruit. (Perfumer & Flavorist, Vol. 29, No. 8, p. 65 ff, 2004) Boelens indicates -sweet aromatic, fatty, slightly fruity flavor (FRM 2001) …	odorant					unspecified odorant	sweet	fruity	pineapple	tropical fruit	green	floral	apricot	peach				1	1	1	1	0	0	0	0	0	0	0	0
1	1	1	OCCC(=O)OCC1=CC=CC=C1	achiral	Benzyl-lactate	1	273	276	322	Benzyl lactate		Benzyl lactate; Benzyl 2-hydroxypropanoate		Bland weak sweet, caramellic, dairy fruity note	C10 H12 O3	180.2	2051-96-9	Artificial	Not considered Nature Identical by IOFI	Boelens indicates -aromatic fruity, somewhat caramellic odor (PMP 2001); aromatic, burnt fruity, caramellic note flavor (FRM 2001) The Good Scents Co. indicates -floral fatty butter fruity odor M. Gomberg, C. C. Buchler, J. Am. Chem. Soc., 1920, 42 (10), p. 2065, indicate that benzyl lactate is practically devoid of odor. Used in dairy, caramel, chocolate and fruit flavors. Also, because of its m…	odorant					unspecified odorant	bland	weak	sweet	caramellic	dairy	fruity						1	1	0	0	1	0	0	0	0	0	0	0
1	1	1	CC(=O)CCC(=O)OCC1=CC=CC=C1	achiral	benzyl-levulinate	1	274	277	323	Benzyl levulinate		Benzyl levulinate; benzyl 4-oxopentanoate		Sweet caramellic-fruity odor	C12 H14 O3	206.238	6939-75-9	Artificial	#N/A	Boelens indicates: aromatic, somewhat burnt caramellic, slightly fruity (FRM2001). JECFA indicates -Strong fruity aroma Useful in fruit flavors and as a modifier. Normal use levels in finished products: Baked goods (3/50 ppm); non-alcoholic beverages (0.3/5 ppm); alcoholic beverages (0.1/1 ppm); Chewing gum (15/250 ppm); Fats/Oils, Hard & soft candy, Snack foods (0.1/5 ppm); Frozen dairy (1/10 pp…	odorant					odor	sweet	caramellic	fruity	odor								1	1	0	0	0	0	0	0	0	0	0	0
1	1	1	C\\C=C/C(O)=O	achiral	isoCrotonic-acid	1	326	329	385	Butenoic acid		Butenoic acid; But-2-enoic acid (cis or trans)	Crotonic acid (trans) or isoCrotonic acid (cis)	Acidic, sharp sour with spicy caramellic notes; weal milky flavor	C4 H6 O2	86.089	3724-65-0	Nature Identical	Banana, Cocoa, Coffee, Beer, Bread, Papaya, Black tea, Cherimoya, Yellow passion fruit, Shoyu, HVP	Crotonic acid appears on the Japanese Flavor List. Oxford (now Frutarom) indicates: Odour Description -Roast, Burnt Suggested Uses -Bread, Coffee, Tropical Fruits The Good Scents Co. indicates -roasted burnt odor Ivon Flament, Yvonne Bessière-Thomas indicate -very weak mild milky flavor (Coffee flavor chemistry, Wiley and Sons, 2001, p. 158) Possible used include caramel, maple, dairy, fruit, roa…	odorant					unspecified diff flavor	acidic	sharp	sour	spicy	caramellic							0	0	0	0	0	0	0	0	0	0	0	0
1	1	1	CCCCOC(C)=O	achiral	n-Butyl-acetate	1	336	339	397	n-Butyl acetate		Butyl acetate; n-Butyl acetate;	Butyl ethanoate;	Strong, sweet, fruity; banana, pear, pineapple notes	C6 H12 O2	116.158	123-86-4	Nature Identical	Apple, Banana, Cherry, Cocoa, Coffee, Grape, Grape Brandy, Honey, Peach, Pear, Raspberry, Strawberry, Wine.	Odor threshold in water: 66 ppb. Mosciano (1999) describes the odor characteristics as "sharp, etherial, diffusive, fruity banana" and the taste @ 30 ppm as "sweet, ripe banana, tutti-fruiti, tropical and candy-like with green nuances". Suggested Applications -Tutti frutti, banana, apple, juicy fruit, strawberry and berry nuances. (Perfumer & Flavorist, March/April 1999, p. 49) Burdock indicates …	odorant					unspecified odorant	strong	sweet	fruity	banana	pear	pineapple						1	1	0	0	0	0	0	1	0	0	0	0
1	1	1	CC(=O)CC(=O)OC(C)(C)C	achiral	tert-butyl-acetoacetate	1	338	341	399	tert-Butyl acetoacetate		Butyl acetoacetate; tert-Butyl acetoacetate	tert-Butyl 3-oxobutanoate	Fermented, caramellic, brandy, heavy fruit-notes	C8 H14 O3	158.195	1694-31-1	Artificial	#N/A	Used in fruity & caramellic flavors. 560 O H3C O CH3 O	odorant					unspecified odorant	fermented	caramellic	brandy	heavy fruit								0	0	0	0	0	0	0	0	0	0	0	0
1	1	1	CCCCOC(=O)\\C(C)=C/C	achiral	Butyl-angelate	1	341	344	403	Butyl angelate		Butyl angelate; Butyl cis-2-Methyl-2-butenoate;	Butyl 2-methylisocrotonate; Butyl 2-methylbut-2(cis)-enoate	Sweet, herbal, fruity, floral with winey, caramelic, chamomille notes	C9 H16 O2	156.222	7785-64-0	Nature Identical	Roman chamomille	Odor threshold in water = 13 ppb; Ref: Takeoka et al. (1998) in L.J. van Gemert, Compilations of odour threshold values in air & water, Publisher: Boelens Aroma Chemical Information Service, Huizen, The Netherlands, 2003 In a sample of Roman chamomille analyzed by Klimes and D. Lamparsky (1984), butyl angelate comprised 0.14% of the oil. Boelens indicates -fruity, herbal; fruity note is more pron…	odorant					unspecified odorant	sweet	herbal	fruity	floral	winey	caramellic	chamomile					1	1	0	1	0	0	0	0	0	0	0	0
1	1	1	CCCC(=O)OC(C)CC	achiral	sec-Butyl-butanoate	1	344	347	406	sec-Butyl butyrate		Butyl butanoate; sec-Butyl butyrate; 1-Methylpropyl butanoate;	But-2-yl butyrate; 2-Butyl butanoate	Sweet, fruity, banana-apple-pear-apricot-pineapple-rum notes	C8 H16 O2	144.211	819-97-6	Nature Identical	Tomato, Cheddar cheese, Gruyere de comte cheese, Custard apple	Boelens indicates -fresh fruity, slightly buttery, fatty; apple-& banana-like odor (PMP 2001); fresh fruity, slightly buttery, fatty flavor (FRM 2001) The enantiomers are decribed as: (2S)-(+)-2-Butyl butanoate -intensely fruity, sweet ester note (2R)-(-)-2-Butyl butanoate -flowery, musty, weaker than its enantiomer See http://www.leffingwell.com/chirality/2-butylbutyrate.htm Used in Apple, Pear,…	odorant					unspecified odorant	sweet	fruity	banana	apple	pear	apricot	pineapple	rum				1	1	0	0	0	0	0	0	0	0	0	0
1	1	1	CCCCOC(=O)\\C=C\\C	achiral	Butyl-but-2-enoate	1	345	348	408	Butyl crotonate	Butyl butenoate	Butyl butenoate; Butyl 2-butenoate; Butyl crotonate		Fruity, green, herbal, pineapple, rum, cognac, apple in dilution	C8 H14 O2	142.196	591-63-9	Nature Identical	Cherimoya, Mountain papaya	The CAS 7299-91-4 is listed as Butyl but-2-enoate in the EINECS register and in the Japanese flavor list. The CAS 591-63-9 is listed as Butyl trans-but-2-enoate in the EC Register list and in the Japanese flavor list. Boelens indicates -fresh, fruity, ethereal, somewhat gassy odor (PMP 2001); fruity, somewhat gassy and herbaceous flavor (FRM 2001) Used in fruit flavors and chamomille types. 571 O…	odorant					unspecified odorant	fruity	green	herbal	pineapple	rum	cognac	apple					1	0	1	0	0	0	0	0	0	0	0	0
1	1	1	CCCCOC(=O)CCC	achiral	n-Butyl-butanoate	1	346	349	410	Butyl butyrate		Butyl butyrate; Butyl butanoate;	Butyric acid, ester of n-butanol; Butanoic acid, ester of 1-butanol;	Strong, sweet, fruity, banana-pear-pineapple-apple notes	C8 H16 O2	144.211	109-21-7	Nature Identical	Apple, Banana, Grape, Grape Brandy, Honey, Mango, Melon, Papaya, Pear, Plum, Strawberry.	Odor threshold in water: 100 ppb. Mosciano, et. al. (1992), have described the organoleptic properties as follows: Odor as "Sweet, fruity, fresh, diffusive and ripe" and taste as"Sweet, fresh, fruity, slighty fatty" at 40 ppm. Suggested Applications -Apple, juicy-fruit, banana, pineapple, strawberry and orange. (Perfumer & Flavorist, Vol. 17, July/August 1992, p. 34) Oxford (now Frutarom) indicat…	odorant					unspecified odorant	strong	sweet	fruity	banana	pear	pineapple	apple					1	1	0	0	0	0	0	1	0	0	0	0
1	1	1	CCCCOC(=O)COC(=O)CCC	achiral	Butyl-O-butyrylglycollate	1	347	350	411	Butyl butyrylglycolate		Butyl butyrylglycolate; Butyl O-butyrylglycollate	2-hydroxyacetic acid, butyl ester, butyric acid ester; 2-butoxy-2-oxoethyl butyrate; (butoxycarbonyl)methyl butyrate	Fruity, caramellic, somehat creamy, fatty and dairy-like	C10 H18 O4	202.248	94022-04-5	Artificial	Not considered Nature Identical by IOFI	Previously assigned Flavis No. 09.497 *Note -COMMISSION DECISION of 7 April 2004 amending Decision 1999/217/EC as regards the EC register of flavouring substances: Deleted from list. This material was removed from the 4th Edition of the Council of Europe List (1992); it formerly had COE # 2188. Boelens indicates -fruity, slightly herbal, caramellic note odor (PMP 2001); mild, fruity, somewhat oil…	odorant					unspecified odorant	fruity	caramellic	creamy	fatty	dairy							1	0	0	0	0	1	0	0	0	0	0	0
1	1	1	CCCCCC(=O)OCCCC	achiral	Butyl-hexanoate	1	359	362	427	Butyl caproate		Butyl hexanoate; Butyl caproate;	Hexanoic acid, n-Butyl ester;	Fruity, pineapple, green, waxy, tutti-fruitti, berry, juicy, fermented	C10 H20 O2	172.265	626-82-4	Nature Identical	Apple, Banana, Grape, Mango, Pear, W hiskey, Wine.	Odor threshold in water: 700 ppb. Mosciano, et al. indicate -"Odor: @ 1.0%. Estry, sweet fruity, slightly juicy with green waxy nuances reminiscent of pineapple, apple, pear and tropical notes. Taste: @ 10 ppm. Estry fruity, juicy with green waxy notes, reminiscent of pear, banana and strawberry. Possible applications: Pineapple, pear, tutti-frutti, banana, strawberry, tallow." (Perfumer & Flavor…	odorant					unspecified odorant	fruity	pineapple	green	waxy	tutti frutti	berry	juicy	fermented				1	0	1	0	0	0	0	0	1	0	0	0
1	1	1	CCCCOC(=O)C(C)O	achiral	n-Butyl-2-hydroxypropanoate	1	365	368	437	n-Butyl 2-hydroxypropanoate		Butyl lactate; n-Butyl 2-hydroxypropanoate;	Lactic acid, n-butyl ester; 2-Hydroxypropanoic acid, n-butyl ester;	Light, sweet, buttery, caramellic odor; creamy, milky, nutty flavor	C7 H14 O3	146.184	138-22-7	Nature Identical	Cider, Grape Brandy.	Mosciano, et. al. report that this material has a "sweet, diffusive and fruity with a fermented nuance" odor and a "harsh and sulfuraceous with fruit notes" taste at 100 ppm. (Perfumer & Flavorist, Vol. 14, November/December 1989, p. 48) Mosciano, et. al. (1998) describe the Odor Characteristics of a natural sample as Creamy, dairy, milky, earthy, ketonic, waxy, Iactonic, vanilla and cheesy and t…	odorant					odor diff flavor	weak	sweet	buttery	caramellic	odor							0	1	0	0	1	0	0	0	0	0	0	0
1	1	1	CCC(C)OC(=O)C(C)O	achiral	sec-Butyl-lactate	1	366	369	438	sec-Butyl lactate		Butyl lactate; sec-Butyl lactate; 2-Butyl 2-hydroxypropionate	1-Methylpropyl 2-hydroxypropanoate	Weak, sweet, dairy-buttery caramellic with fruity undernote	C7 H14 O3	146.184	18449-60-0	Nature Identical	Cheddar cheese	Boelens indicates -fruity, somewhat burnt, cheesy note flavor (FRM 2001) Used in butter, dairy, caramel, butterscotch & rum, fruit flavors. 614 O O CH3CH3	odorant					unspecified odorant	weak	sweet	dairy	buttery	caramellic	fruity						1	1	0	0	1	0	0	0	0	0	0	0
1	1	1	CCCCOC(=O)CCC(C)=O	achiral	Butyl-levulinate	1	368	371	440	Butyl levulinate		Butyl levulinate;	n-Butyl 4-oxopentanoate; Levulinic acid, n-butyl ester; Butyl 4-ketovalerate; 4-Oxopentanoc acid, n-butyl ester; Butyl acetylpropionate; Butyl 4-oxovalerate	Weak, sweet, fruity, waxy-fatty, caramellic, savory, slight astringency	C9 H16 O3	172.222	2052-15-5	Artificial	Not considered Nature Identical by IOFI	Bedoukian indicates: Odor Description: An herbaceous, waxy, fatty odor with savory applications. Fragrance Use: For a smoky savory note in heavier fragrances. Flavor Use: Used in herb, butter, bacon, chocolate, smoke flavors. Fruit applications include banana, melon, honeydew and cherry flavors. Boelens indicates -fruity, waxy odor & flavor (FRM 2001) & (PMP 2001) The Good Scents Co. indicates -f…	odorant + taste					unspecified diff taste	weak	sweet	fruity	waxy	fatty	caramellic	savory					1	1	0	0	1	1	0	0	1	0	0	0
1	1	1	CCCCOC(=O)C(C)CC	achiral	n-Butyl-2-methylbutyrate	1	374	377	446	Butyl methylbutyrate		Butyl methylbutyrate; n-Butyl 2-methylbutyrate	Butyl 2-methylbutanoate; 2-Methylbutanoic acid, n-butyl ester	Fruity, apple-pineapple, tropical odor; pineapple, apple, tropical taste	C9 H18 O2	158.238	15706-73-7	Nature Identical	Apple, Banana, Melon, Strawberry.	Odor threshold in water: 17 ppb. Oxford (now Frutarom) indicates: Odour Description -Cocoa, Fruity, Green, Sweet Suggested Uses -Banana, Hard Fruits, Melon, Papaya, Peach, Soft Fruits, Strawberry Interchim describes the odor/flavor properties as Tropical, fruity, pineapple odor, apple and grape taste. Citrus & Allied describe the odor as: diffusive fruity, almost peach-like odor. Mosciano et al. …	odorant + taste					odor diff taste	fruity	apple	pineapple	tropical fruit	odor							1	0	0	0	0	0	0	0	0	0	0	0
1	1	1	CCC(C)OC(=O)\\C(C)=C\\C	achiral	sec-butyl-2-methylcrotonate	1	375	378	447	Butyl methylcrotonate		Butyl methylcrotonate; sec-Butyl 2-methylcrotonate	sec-Butyl tiglate; 2-Butyl 2-methyl-2-butenoate; 2-Butyl tiglate	Sweet herbaceous, fruity caramellic, chamomille notes	C9 H16 O2	156.222		Nature identical	Roman Chamomille	Previously assigned Flavis No. 09.868 *Note -COMMISSION DECISION of 7 April 2004 amending Decision 1999/217/EC as regards the EC register of flavouring substances: Deleted from list. In a sample of Roman chamomille analyzed by Klimes and D. Lamparsky (1984), sec-butyl angelate comprised a trace of the oil. Used in chamomille substitutes, herbal and fruit flavors. 626 O O CH3 OCH3	odorant					unspecified odorant	sweet	herbaceous	fruity	caramellic	chamomile							1	1	0	0	0	0	1	0	0	0	0	0
1	1	1	CC(C)C(=O)OC\\C=C\\C1=CC=CC=C1	achiral	Cinnamyl-isobutyrate	1	500	504	600	Cinnamyl isobutyrate		Cinnamyl isobutyrate; Cinnamyl 2-methylpropanoate;	3-Phenyl-2-propen-1-yl isobutyrate; 3-Phenyl-2-propen-1-yl 2-methylpropanoate; Cinnamyl isobutanoate;	Fruity, balsamic-spicy, sweet taste; plum, pineapple, apple, banana notes	C13 H16 O2	204.265	103-59-3	Nature Identical	Cinnamon	Mosciano, et. al. report that this material has a "sweet, fruity, pineapple, spicy, slightly floral" odor and a "fruity, sweet, pineapple, with waxy and spicy nuances" taste at 25 ppm. Oxford (now Frutarom) indicates: Odour Description -Balsamic, Floral, Spicy, Sweet Suggested Uses -Apple, Apricot, Dairy Products, Hard Fruits, Pineapple, Plum, Soft Fruits, Strawberry, Tobacco Boelens indicates -s…	odorant + taste					unspecified odorant diff taste	plum	pineapple	apple	banana								0	0	0	0	0	0	0	0	0	0	0	0
1	1	1	CCCCCC(=O)OCCC(C)CCC=C(C)C	achiral	Citronellyl-hexanoate	1	522	527	629	Citronellyl hexanoate		Citronellyl hexanoate; Citronellyl caproate	3,7-Dimethyloct-6-enyl hexanoate	Floral, apple-pear-pineapple fruity notes with rose connotations	C16 H30 O2	254.408	10580-25-3	Nature Identical	Purple & Yellow passion fruit & juices, Geranium, Rose	The Good Scents Company indicates -fine rose fruity floral Arctander indicates -Delicately floral fruity, somewhat rose odor with apple-pear-pineapple notes. Boelens indicates -mild floral-fruity, fatty, somewhat rose like flavor (FRM 2001) Useful in Berry, Honey, Apple, Apricot, Pear, Strawberry and Fruit Punch type flavors as well as Tobacco flavors. 873 CH3CH3 O CH3 CH3	odorant					unspecified odorant	floral	apple	pear	pineapple	fruity	rose						1	0	0	1	0	0	0	0	0	0	0	0
1	1	1	C\\C=C\\C(O)=O	achiral	Crotonic-acid	1	544	549	653	Crotonic acid		Crotonic acid; 2-Butenoic acid; (E)-2-Butenoic acid;	trans-2-Butenoic acid	Acidic, sharp sour milky with spicy burnt caramellic notes	C4 H6 O2	86.089	107-93-7	Nature identical	Mango, Chinese quince, Chempedak, Coffee	Oxford (now Frutarom) indicates: Odour Description -Roast, Burnt Suggested Uses -Bread, Coffee, Tropical Fruits The Good Scents Co. indicates -roasted burnt odor Also desribed as a very weak mild milky flavor (Ivon Flament, Yvonne Bessière-Thomas, Coffee flavor chemistry, W iley and Sons, 2001, p. 158) Burdock indicates -a pungent odor (Fenaroli’s Handbook of Flavor Ingredients, Fifth Edition, CR…	odorant					unspecified odorant	acidic	sharp	sour milk	spicy	burned	caramellic						0	0	0	0	0	0	0	0	0	0	0	0
1	1	1	OC(=O)CC1CCCCC1	achiral	Cyclohexaneacetic-acid	1	560	565	672	Cyclohexaneacetic acid		Cyclohexaneacetic acid;	Hexahydrophenylacetic acid; Cyclohexylacetic acid;	Waxy, phenylacetic acid-like, cheese butter honey caramellic notes	C8 H14 O2	142.196	5292-21-7	Artificial	Not considered Nature Identical by IOFI	Odor threshold in water = 19100 ppb in L.J. van Gemert, Compilations of odour threshold values in air & water, Publisher: Boelens Aroma Chemical Information Service, Huizen, The Netherlands, 2003 Mosciano, et. al. report that this material has a "sharp acidic, fatty cheesy, musty, powdery, honey and caramellic" odor and a "honey, caramellic, maple and cocoa" taste at 100 ppm. The Good Scents Co. …	odorant					unspecified odorant	waxy	phenylacetic acid	cheese	buttery	honey	caramellic						0	0	0	0	0	0	0	0	1	0	0	0
1	1	1	CC(=O)CC(=O)OC1CCCCC1	achiral	cyclohexyl-acetoacetate	1	569	574	681	Cyclohexyl acetoacetate		Cyclohexyl acetoacetate; Cyclohexyl 3-oxobutanoate		Fruity, sweet, slightly caramellic	C10 H16 O3	184.232	6947-02-0	Artificial	#N/A	Used in various berry and fruit flavors, particularly for hard candy, etc. 947 O O NH2	odorant					unspecified odorant	fruity	sweet	weak	caramellic								1	1	0	0	1	0	0	0	0	0	0	0
1	1	1	CCCCCC(=O)OC1CCCCC1	achiral	Cyclohexyl-hexanoate	1	573	578	685	Cyclohexyl caproate		Cyclohexyl caproate; Cyclohexyl hexanoate;	Hexanoic acid, cyclohexyl ester	Fruity, winey, pineapple, somewhat metallic odor	C12 H22 O2	198.302	6243-10-3	Artificial	Not considered Nature Identical by IOFI	Previously assigned Flavis No. 09.172 *Note -COMMISSION DECISION of 7 April 2004 amending Decision 1999/217/EC as regards the EC register of flavouring substances: Deleted from list. The Good Scents Company indicates -fruity pineapple odor Boelens indicates -fruity, somewhat caprylic, slightly fatty odor/flavor (FRM 2001) & PMP 2001) Arctander indicates -Fruity-winey; somewhat "metallic" odor. A …	odorant					odor	fruity	winey	pineapple	metallic	odor							1	0	0	0	0	0	0	0	0	0	0	0
1	1	1	CCC(=O)OC1CCCCC1	achiral	Cyclohexyl-propionate	1	579	584	691	Cyclohexyl propionate		Cyclohexyl propionate; Cyclohexyl propanoate;		Sweet, fruity odor; banana, green-waxy pineapple notes	C9 H16 O2	156.222	6222-35-1	Artificial	Not considered Nature Identical by IOFI	Mosciano, et. al. report that this material has a "sweet, fruity, banana with green waxy nuances" odor and a "sweet, fruity, banana, with green waxy nuances" taste at 30 ppm. Interchim describes the odor/flavor properties as Banana, apple odor, banana, rum taste. The Good Scents Company indicates -sweet fruity banana green waxy Boelens indicates -sweet, fruity, banana, with green waxy nuances odo…	odorant					odor	sweet	fruity	odor	banana	green	waxy	pineapple					1	1	1	0	0	0	0	0	1	0	0	0
1	1	1	CC(=O)OC1=C(C)CCC1=O	achiral	cyclotene-acetate	1	598	603	714	Cyclotene acetate		Cyclotene acetate; Methylcyclopentenolone acetate	2-methyl-5-oxocyclopent-1-en-1-yl acetate; ; 2-oxo-5-methyl-5-cyclopentenyl acetate	Caramellic, somewhat fruity	C8 H10 O3	154.163	1196-22-1	Artificial	#N/A	Used in caramellic & fruity flavors. 990 O CH3 O O CH3 CH3	odorant					unspecified odorant	caramellic	fruity										1	0	0	0	0	0	0	0	0	0	0	0
1	1	1	CC(C)C(=O)OC1=C(C)CCC1=O	achiral	cyclotene-isobutyrate	1	599	604	715	Cyclotene isobutyrate		Cyclotene isobutyrate; Methylcyclopentenolone isobutyrate	2-methyl-5-oxocyclopent-1-en-1-yl 2-methylpropanoate	Caramelic, somewhat fruity, buttery, nutty	C10 H14 O3	182.216	68084-07-?	Artificial	#N/A	Possible uses include caramel, nut, fruit, sugary and roasted flavors. 991 CH3 O CH3 O O	odorant					unspecified odorant	caramellic	fruity	buttery	nutty								1	0	0	0	0	0	0	0	0	0	0	0
1	1	1	CCC(=O)OC1=C(C)CCC1=O	achiral	cyclotene-propionate	1	600	605	716	Cyclotene propionate		Cyclotene propionate ; Methylcyclopentenolone propionate	2-methyl-5-oxocyclopent-1-en-1-yl propionate	Caramelic, somewhat buttery, nut-like odor	C9 H12 O3	168.19	87-55-8	Artificial	#N/A	Arctander describes this as a "powerful caramelic, somewhat sharp, walnut-like odor..." and the taste as sweet caramelic, walnut-like taste of considerable power." Similar to cyclotene. JECFA indicates -Creamy carmellic buttery aroma Possible uses include caramel, nut, fruit, sugary and roasted flavors. Use levels in finished products range from 0.1 to 20 ppm. See FEMA GRAS list No. 24 for specif…	odorant					odor	caramellic	buttery	nutty	odor								0	0	0	0	0	0	0	0	0	0	0	0
1	1	1	CCCCC1CCCCC(=O)O1	achiral	epsilon-Decalactone	1	616	621	741	epsilon-Decalactone		Decalactone; epsilon-Decalactone; 6-Decanolide;	7-Butyl-2-oxepanone; Decan-1,6-olide; 6-Butylhexanolide; Decanolide-1,6; 6-Hydroxydecanoic acid, epsilon lactone;	Caramellic, fruity, coconut, nutty, milky odor and taste	C10 H18 O2	170.249	5579-78-2	Artificial	Not considered Nature Identical by IOFI	Mosciano, et. al. indicate -"Odor: @ 1.0%. Sweet, coconut creamy, milky with a phthalate celery like note, and a fatty melted butter and dry lactonic cheese like nuance. Taste: @ 10 ppm. Waxy, sweetened coconut, dairy creamy with a melted butter, slightly brown butter and toffee-like nuance. Possible applications: Coumarin, vanilla, dairy cheese, cream and butter, coconut and peach." (Perfumer & …	odorant + taste					odor idem taste	caramellic	fruity	coconut	nutty	milky	odor	taste					1	0	0	0	0	0	0	0	0	0	0	0
1	1	1	CC(=O)CCCCCCC=C	achiral	9-decen-2-one	1	653	658	785	9-Decen-2-one		Decenone; 9-Decen-2-one; Dec-9-en-2-one	Methyl oct-7-enyl ketone	Pineapple, with fruity notes of pear, apple, green & fatty	C10 H18 O	154.249	35194-30-0	Nature Identical	Pineapple	Note* -at the time of this writing, this material has been assigned an EC Flavis number, but not officially been placed on the EC Register List. The Flavis number is 07.262 This material is described by Joseph Zucca & Christine Schippa, Identification of 9-Decen-2-one in Pineapple, Perfumer & Flavorist, Vol 34, No. 7, 42-47 (2009). Aroma: Pure 9-Decen-2-one (99%) has been evaluated in 5% ethanol …	odorant					unspecified odorant	pineapple	fruity	pear	apple	green	fatty						1	0	1	0	0	1	0	0	0	0	0	0
1	1	1	CCCCCCCCCCOC(C)=O	achiral	n-Decyl-acetate	1	657	662	790	Decyl acetate		Decyl acetate; n-Decyl acetate;	Decyl ethanoate; Decanyl acetate; Acetate C-10;	Fatty, fruity, orange-rose aroma; in dilution, pineapple note	C12 H24 O2	200.318	112-17-4	Nature Identical	Apple, Grape Brandy, Grapefruit, Lemon, Mandarin, Melon, Orange, Strawberry, Galerita lecontei (carabid beetle)	Mosciano, et. al. report that this material has a "waxy, sweet, fatty, creamy and slightly soapy" odor and a "waxy, soapy, and fatty" taste at 20 ppm. Suggested Applications -Honey, orange, grapefruit, peach, cream, pineapple, fat notes. (Perfumer & Flavorist, Vol. 15, September/October 1993, p. 48) Interchim describes the odor/flavor properties as Floral, orange-rose odor, used in orange, tropic…	odorant					aroma	fatty	fruity	orange	rose	aroma	pineapple						1	0	0	0	0	1	0	0	0	0	0	0
1	1	1	CCCCCCCCCCOC(=O)CCCCC	achiral	decyl-hexanoate	1	660	665	793	Decyl hexanoate		Decyl hexanoate; decyl caproate		Oily-fruity, fatty with some pineapple notes	C16 H32 O2	256.424	52363-43-6	Nature Identical	Strawberry, Babaco fruit	Oily-fruity, also reminiscent of the fatty notes in Pineapple. Sweet, oily-fruity flavor. 1109 CH3O O CH3 CH3	odorant					unspecified odorant	oily	fruity	fatty	pineapple								1	0	0	0	0	1	0	0	0	0	0	0
1	1	1	CC1=C(O)C(=O)C(O)CO1	achiral	dihydrodihydroxymethylpyranone	1	748	755	896	Dihydrodihydroxymethylpyranone		Dihydrodihydroxymethylpyranone; DDMP	2,3-dihydro-3,5-dihydroxy-6-methyl-4H-pyran-4-one; 3,5-dihydroxy-6-methyl-2,3-dihydro-4H-pyran-4-one; 2,3-dihydro-3-hydroxymaltol;	Weak caramellic, sugar notes	C6 H8 O4	144.125	28564-83-2	Nature Identical	Beer, Malt whisky, Cocoa, Coffee, Malt, Elderberry juice, Soy hydrolysate, Caramellized sugar, Rambutan fruit, Polybia sericea Olivier	Odor threshold in water = 35000 ppb -(van Gemart, L.J., Compilations of odour threshold values in air & water & other, Publisher: Oliemans Punter & Partners, The Netherlands, 2003 Edition) This material is probably a precursor in the formation of maltol. It is commonly seen as a thermal decomposition product of sugar containing materials (e.g., in GC analyses of fruit juice containing flavors). W…	odorant					unspecified odorant	weak	caramellic	sugar									0	0	0	0	1	0	0	0	0	0	0	0
1	1	1	CC1CC(=O)C(=C1C)O	achiral	3-4-Dimethyl-1-2-cyclopentadione	1	842	850	1006	3,4-Dimethyl-1,2-cyclopentadione		Dimethylcyclopentadione; 3,4-Dimethyl-1,2-cyclopentadione	3,4-Dimethyl-2-hydroxy-2-cyclopenten-1-one; Methyl corylone (GIV.);	Strong maple, burnt-sugar, caramel odor/taste; cyclotene-like	C7 H10 O2	126.153	13494-06-9	Nature Identical	Coffee, Tobacco Smoke, Wood Smoke.	Odor threshold in water: 17-20 ppb. Givaudan indicates: Organoleptic character -Brown, Maple, Sweet Description -This chemical is commonly used to compliment brown notes in sweet and savoury flavours. Recommended flavour usage -Caramel, Coffee, Maple, Raisin Recommended use level -< 10 ppm Mosciano et al. indicate -"Odor: @ 1.0%. Sweet burnt maple, toffee, caramellic, burnt sugary, brown sugar an…	odorant + taste					odor idem taste	strong	maple	burnt sugar	caramellic	odor	taste	cyclotene					0	0	0	0	0	0	0	1	0	0	0	0
1	1	1	CC1CC(=C(O)C1=O)C	achiral	3-5-Dimethyl-1-2-cyclopentadione	1	843	851	1007	3,5-Dimethyl-1,2-cyclopentadione		Dimethylcyclopentadione; 3,5-Dimethyl-1,2-cyclopentadione;	3,5-Dimethyl-2-hydroxy-2-cyclopenten-1-one; Coronol (GIV.);	Strong, maple-caramel, nutty odor/taste; similar to cyclotene	C7 H10 O2	126.153	13494-07-0	Nature Identical	Coffee, Tobacco Smoke.	Odor perception threshold in water: 1000 ppb. Givaudan indicates: Organoleptic character -Burnt Sugar, Toffee Description -This chemical can be used to introduce caramelized notes in the flavour. Recommended flavour usage -Coffee, Toffee, Brown Sugar, Caramel, Tonka, Roast Pork, Roast Chicken, Roast Beef, Licorice Recommended use level -< 5 ppm Boelens indicates -maple, burnt sugar (FRM 2001) Mos…	odorant + taste					odor idem taste	strong	maple	caramellic	nutty	odor	taste	cyclotene					0	0	0	0	0	0	0	1	0	0	0	0
1	1	1	CC1CC(=O)C=C1C	achiral	3-4-Dimethylcyclopent-2-en-1-one	1	844	852	1008	Dimethylcyclopentenone		Dimethylcyclopentenone; 3,4-Dimethylcyclopent-2-en-1-one		Ketonic, caramellic, somewhat burnt	C7 H10 O	110.154	30434-64-1	Nature identical	Dried bonito	Boelens indicates -caramellic, fruity, somewhat burnt flavor (FRM 2001) May find some use in caramel & roasted flavors. Previously assigned Flavis No. 07.155 *Note -COMMISSION DECISION of 7 April 2004 amending Decision 1999/217/EC as regards the EC register of flavouring substances: Deleted from list. 1405 O H3C H3C CH3 CIS & TRANS	odorant					unspecified odorant	ketonic	caramellic	burned									0	0	0	0	0	0	0	0	0	0	0	0
1	1	1	CCOC1=C(C)OC(C)C1=O	achiral	2-5-Dimethylethoxyfuranone	1	849	857	1014	Dimethylethoxyfuranone		Dimethylethoxyfuranone; 2,5-Dimethyl-4-ethoxyfuran-3(2H)-one	Fraision Ethyl Ether; 4-Ethoxy-2,5-dimethylfuran-3(2H)-one; 2,5-Dimethyl-4-ethoxy-3(2H)-furanone	Sweet, fruity, caramellic-roasted with berry (strawberry) notes	C8 H12 O3	156.179	65330-49-6	Nature identical	Coffee	Odor threshold in water = 2900 ppb -(van Gemart, L.J., Compilations of odour threshold values in air & water & other, Publisher: Oliemans Punter & Partners, The Netherlands, 2003 Edition) Jiaxing WinTrust Flavours indicates: Odor: Fruity, brandy like, soft caramel. Boelens indicates: fresh, sweet, fruity and caramellic, cooked strawberry note flavor (FRM 2001) The Good Scents Co. indicates -caram…	odorant					unspecified odorant	sweet	fruity	caramellic	roasted	berry	strawberry						1	1	0	0	0	0	0	0	0	0	0	0
1	1	1	CC1OC(=CC1=O)C	achiral	2-5-Dimethylfuranone	1	856	864	1021	Dimethylfuranone		Dimethylfuranone; 2,5-Dimethyl-3(2H)-furanone	2,5-Dimethylfuran-3(2H)-one	Sweet, roasted, caramel, bread-like, buttery, coffee bean, burnt sugar	C6 H8 O2	112.127	14400-67-0	Nature Identical	Coffee, Yellow passion fruit, Wild Rice, Wheat bread	Oxford (now Frutarom) indicates: Odour Description -Caramel, Fruity, Sweet Suggested Uses -Bakery, Coffee, Savoury Previously described as -Buttery, sweet, candy floss (cotton candy) Mosciano, et. al. (2007) describe the odor of a natural sample @ 5.0% as -Sweet, brown, caramel, toasted and roasted, slightly buttery and maplelike with hazelnut and cocoa nuances. Taste @ 25 ppm -Sweet fruity straw…	odorant					unspecified odorant	sweet	roasted	caramellic	bread	buttery	coffee	burnt sugar					0	1	0	0	0	0	0	0	0	0	0	0
1	1	1	COC1=C(C)OC(C)C1=O	achiral	mesifurane	1	871	880	1041	Dimethylmethoxyfuranone		Dimethylmethoxyfuranone; 2,5-Dimethyl-4-methoxy-3(2H)-furanone	Mesifuran; Furaneol® methyl ether, 4-Methoxy-2,5-dimethyl-3(2H)-furanone; 2,5-Dimethyl-4-methoxy-2,3-dihydrofuran-3-one;	Sweet, fruity caramellic "sherry" like odor; Xeres wine note	C7 H10 O3	142.152	4077-47-8	Nature Identical	Grape, Mango, Pineapple, Raspberry, Strawberry, Blackberry, Arctic bramble, Gooseberry, Kiwi	Odor threshold in water: 0.03 ppb. Flavor threshold = 0.4 ppb (for the racemate) Firmenich indicates: Nice sweet, caramelic, musty, cocoa and coffee notes. FURANEOL® METHYLETHER brings along with its typical caramelic character, slight meaty and green nuances which work perfectly in strawberry, crab, orange, forest fruits and banana flavors. Recommended dosage in final application up to 5 ppm Mos…	odorant					odor	sweet	fruity	caramellic	sherry	odor	xeres	winey					1	1	0	0	0	0	0	0	0	0	0	0
1	1	1	CC1=C(C)N=CC=N1	achiral	2-3-Dimethylpyrazine	1	898	907	1074	2,3-Dimethylpyrazine		Dimethylpyrazine; 2,3-Dimethylpyrazine;	2,3-Dimethyl-1,4-diazine;	Green, nutty, potato, cocoa, coffee, caramel, meaty notes	C6 H8 N2	108.141	5910-89-4	Nature Identical	Burley Tobacco, Cocoa, Coffee, Cooked Chicken, Cooked Rice, Dried Bonito, Krill, Malt, Mushroom, Roasted Barley, Whiskey, W heat Bread.	Odor threshold in water: 2,500 ppb. Mosciano, et. al. (1996) describe the odor as "Musty, nut skins, cocoa powdery and roasted with potato and coffee nuances" and the taste (at 7.5 ppm) as "Musty, nut skins, cocoa powdery, roasted coffee and bready". Suggested App/icationa-Cocoa, nut, popcorn, potato, bread, peanut, hazelnut, grain and yeast notes. (Perfumer & Flavorist, Vol. 21, November/Decembe…	odorant					unspecified odorant	green	nutty	potato	cocoa	coffee	caramellic	meaty					0	0	1	0	0	0	0	0	0	0	0	0
1	1	1	CCOC1=NC(=CN=C1)C	achiral	2-ethoxy-6-methylpyrazine	1	1017	1026	1213	2-Ethoxy-6-methylpyrazine		Ethoxymethylpyrazine; 2-Ethoxy-6-methylpyrazine		Strong odor and flavor of fresh pineapple	C7 H10 N2 O	138.167	53163-97-6	Artificial	#N/A	Kung, J.-F.; Epstein, M. F., Use of 2-Methyl-6-ethoxypyrazine for Pineapple Flavor, US. Patent 3803331, April, 9, 1974 indicates -It has been found that 2-methyl-6-ethoxypyrazine exhibits a strong odor and flavor of fresh pineapple. If incorporated into foodstuffs, it will impart a very refreshing taste of pineapple,. 1681 CH3 O H3C O	odorant					odor idem flavor	strong	odor	flavor	fresh	pineapple							0	0	0	0	0	0	0	1	0	0	0	0
1	1	1	CCOC(=O)C(C)C(C)OC(C)=O	achiral	Ethyl-3-acetoxy-2-methylbutyrate	1	1032	1041	1229	Ethyl acetoxymethylbutyrate		Ethyl acetoxymethylbutyrate; Ethyl 3-acetoxy-2-methylbutyrate	Ethyl 3-acetoxy-2-methylbutanoate; Ethyl 3-(acetyloxy)-2-methylbutanoate	Fruity with apple, pineapple & tropical fruit notes	C9 H16 O4	188.221	139564-43-5	Nature Identical	Pineapple	This material is the subject of PCT Patent application No. WO0113740 by Dewis et.al. entitled ETHYL 3-ACETOXY-2-METHYLBUTYRATE AS A FLAVORING AGENT AND METHODS FOR PREPARING AND USING SAME (March 1, 2001) which indicates: This material possesses unexpected flavor properties and imparts a unique note to flavors, especially for conferring in foodstuffs a ripe, apple, pineapple and fruity flavor or …	odorant					unspecified odorant	fruity	apple	pineapple	tropical fruit								1	0	0	0	0	0	0	0	0	0	0	0
1	1	1	CCOC(=O)C(C)OC(C)=O	achiral	Ethyl-2-acetoxypropionate	1	1035	1044	1233	Ethyl acetoxypropionate		Ethyl acetoxypropionate; Ethyl 2-acetoxypropionate	Ethyl acetyl lactate	Fruity, dairy with caramel-rum notes	C7 H12 O4	160.168	2985-28-6	Nature Identical	Red wine	Boelens indicates: fruity, somewhat caramellic (FRM 2001). Used in milk, dairy, caramel, chocolate and fruit flavors. 1705 H3C O NH O CH3 O	odorant					unspecified odorant	fruity	dairy	caramellic	rum								1	0	0	0	0	0	0	0	0	0	0	0
1	1	1	CCOC(=O)C(CC)C(C)=O	achiral	Ethyl-2-acetylbutyrate	1	1037	1046	1235	Ethyl acetylbutyrate		Ethyl acetylbutyrate; Ethyl 2-acetylbutyrate;	Ethyl 2-ethylacetoacetate	Fruity, sweet, heavy, caramellic; somewhat cooked apple	C8 H14 O3	158.195	607-97-6	Artificial	#N/A	Boelens indicates -fruity, somewhat burnt, caramellic odor (PMP 2001); fresh, fruity; somewhat burnt-roasted flavor (FRM 2001) Treatt indicates -Fresh, fruity; burnt-roasted; sweet, heavy, caramellic. Used in apple and other fruit flavors. 1707 O O CH3 H3C O	odorant					unspecified odorant	fruity	sweet	heavy	caramellic	cooked apple							1	1	0	0	0	0	0	0	0	0	0	0
1	1	1	CCOC(=O)C(=CC1=CC=CC=C1)C(C)=O	achiral	ethyl-acetylcinnamate	1	1038	1047	1236	Ethyl acetylcinnamate		Ethyl acetylcinnamate; Ethyl 2-acetylcinnamate	Ethyl-2-benzylideneacetoacetate; Ethyl 2-benzylidene-3-oxobutanoate; Ethyl 2-acetyl-3-phenylacrylate; Ethyl alpha-acetylcinnamate	Spicy, with caramelic fruity notes	C13 H14 O3	218.248	620-80-4	Artificial	#N/A	This material commonly forms in situ to a degree in flavors containg benzaldehyde and ethyl acetoacetate Used in various berry and fruit flavors. Normal use levels in finished products: non-alcoholic beverages (0.1/0.5 ppm); Chewing gum (0.8/2 ppm); Confectionery frostings (0.03/0.1 ppm). (Average/Maximum) See FEMA GRAS list No. 24. This material is the unsaturated analog of FEMA No, 2416 1708 O …	odorant					unspecified odorant	spicy	caramellic	fruity									1	0	0	0	0	0	0	0	0	0	0	0
1	1	1	CCOC(=O)\\C=C(\\CC(O)=O)C(O)=O	achiral	Ethyl-aconitate-mixed-esters	1	1046	1055	1245	Ethyl aconitate (mixed esters)		Ethyl aconitate (mixed esters);	Ethyl 1-propene-1,2,3-tricarboxylate; Ethyl 2-carboxyglutaconate;	Sweet, caramel, fruity, winey-rum odor; weak sweet fruity winey taste	C8 H10 O6	202.161	1321-30-8	Artificial	Not considered Nature Identical by IOFI	Burdock indicates -a sweet, fruity, winy odor & flavor. (Fenaroli’s Handbook of Flavor Ingredients, Fifth Edition, CRC Press, 2004, p. 542) Arctander indicates -Sweet, slightly caramellic-fmity odor; a diffusive. winey note. Finds some use in flavor compositions, mainly for Rum, Liqueur and various fruit flavors. Boelens indicates -virtually odourless, mild oily odor (PMP 2001); mild fruity flavo…	odorant + taste					odor diff taste	sweet	caramellic	fruity	winey	rum	odor						1	1	0	0	0	0	0	0	0	0	0	0
1	1	1	CCOC(=O)\\C=C\\C	achiral	Ethyl-crotonate	1	1056	1065	1259	Ethyl crotonate	Ethyl butenoate	Ethyl butenoate; Ethyl 2-Butenoate; Ethyl crotonate;	Ethyl trans-2-Butenoate; Ethyl but-2-enoate; Crotonic acid, ethyl ester;	Pungent, caramellic-fruity, rum, cognac odor and taste	C6 H10 O2	114.142	623-70-1	Nature Identical	Apple, Grape, Passion fruit, Plum, Plum Brandy, Quince, Rum, Strawberry, Wine.	Oxford (now Frutarom) indicates: Odour Description -Caramel, Rum, Sweet Suggested Uses -Alcoholic Beverages, Apple, Caramel, Chocolate, Hard Fruits, Passion Fruit, Pineapple, Strawberry Mosciano, et. al. report that this material has a "pungent, chemical and diffusive, with sweet allicious and caramellic rum-like nuances" odor and a "musty, onion and garlic, caramellic and brown notes" taste at 1…	odorant + taste					odor idem taste	pungent	caramellic	fruity	rum	cognac	odor	taste					1	0	0	0	0	0	0	0	0	0	0	0
1	1	1	CCCC(=O)OCC	achiral	Ethyl-butanoate	1	1059	1068	1262	Ethyl butyrate		Ethyl butyrate; Ethyl butanoate;	Butanoic acid, Ethyl ester;	Ethereal, fruity odor; buttery-pineapple-banana, ripe fruit & juicy notes	C6 H12 O2	116.158	105-54-4	Nature Identical	Apple, Banana, Blue Cheese, Cheddar Cheese, Cherry, Grape, Grape Brandy, Olive Oil, Orange Juice, Peach, Pineapple, Raspberry, Strawberry, Wine.	Odor threshold in water: 1 ppb. Boelens indicates -ethereal, fruity, estery, slightly buttery with pineapple note odor/flavor (PMP 2001 & FRM 2001) Allured's Perfumer's Compendium & The IFF Perfumers Compendium describes this material as "diffusive, fruity-ethereal odor reminscent of banana and pineapple". Frutarom describes the odor/flavor properties as Strawberry, Banana, Pineapple. Wide applic…	odorant					odor	ethereal	fruity	odor	buttery	pineapple	banana	ripe fruit	juicy				1	0	0	0	0	0	0	0	0	0	0	0
1	1	1	CCOC(=O)CCC1CCCCC1	achiral	Ethyl-cyclohexanepropionate	1	1063	1072	1266	Ethyl cyclohexanepropionate		Ethyl cyclohexanepropionate; Ethyl 3-cyclohexylpropionate	Ethyl 3-cyclohexylpropanoate; Ethyl cyclohexylpropionate; Ethyl hexahydrophenylpropionate;	Strong, sweet, fruity, pineapple odor & taste	C11 H20 O2	184.275	10094-36-7	Artificial	Not considered Nature Identical by IOFI	This material was removed from the 4th Edition of the Council of Europe List (1992); it formerly had COE # 2095. Burdock indicates -a powerful, fruity, sweet odor resembling pineapple & sweet, pineapple like taste in dilution (Fenaroli’s Handbook of Flavor Ingredients, Fifth Edition, CRC Press, 2004, p. 557) Boelens indicates -soft fruity, somewhat fatty; pineapple note odor/flavor (PMP 2001 & FR…	odorant + taste					odor idem taste	strong	sweet	fruity	pineapple	odor	taste						1	1	0	0	0	0	0	1	0	0	0	0
1	1	1	CCCCC\\C=C/CCC(=O)OCC	achiral	ethyl-Z-4-decenoate	1	1069	1078	1273	Ethyl cis-4-decenoate		Ethyl decenoate; Ethyl cis-4-decenoate; Ethyl (Z)-4-decenoate	ethyl (4Z)-dec-4-enoate	Fruity, slightl foral, pienapple-pear, peach & strawberry notes	C12 H22 O2	198.302	7367-84-2	Nature Identical	Apple, Grape, Mango, Durian, Pineapple, Pear, Quince, Nectarine, Pear brandy	This material is the subject of United States Patent No. 3,928,402 by Ferdinand Naf (December 23, 1975). The material is described as Fruity, pineapple, pear. In a Tutti-fruity flavor it imparted a heavier and fattier note than the control and possessed a fruity, slightly floral character with a note reminiscent of pear, peach and strawberry fruits. 1761 CH3O O CH3	odorant		faute d'orthographe pour "pineapple" (Fruity, slightl foral, pienapple-pear, peach & strawberry notes) ; corrigé dans la description		faute d'orthographe pour "pineapple" (Fruity, slightl foral, pienapple-pear, peach & strawberry notes) ; corrigé dans la description	unspecified odorant	fruity	weak	floral	pineapple	pear	peach	strawberry					1	0	0	1	1	0	0	0	0	0	0	0
1	1	1	CCCCC\\C=C\\CCC(=O)OCC	achiral	Ethyl-trans-4-decenoate	1	1072	1081	1276	Ethyl trans-4-decenoate		Ethyl decenoate; Ethyl trans-4-decenoate;	Ethyl (E)-4-decenoate; Ethyl trans-dec-4-enoate; trans-4-Decenoic acid, ethyl ester;	Fatty, waxy, green, pineapple and pear-apple notes	C12 H22 O2	198.302	76649-16-6	Nature Identical	Apple, Pear, Pear Brandy, Pineapple, Plum, Quince peel & fruit	Bedoukian indicates: Odor Description: A waxy, leathery, fruity, pear note. Fragrance Use: Used in fruity fragrance compositions. Adds a musty note. Flavor Use: Used to add depth to fruit flavors such as pear, apple, pineapple and peach. Mosciano et. al. (1995) describes the odor as "green, fruity and oily with a pineapple, apple waxy nuance" and the taste (at 10 ppm) as "fatty, waxy, green, pine…	odorant					unspecified odorant	fatty	waxy	green	pineapple	pear	apple						0	0	1	0	0	1	0	0	1	0	0	0
1	1	1	CCOC(=O)\\C(O)=C\\C(=O)CC	achiral	Ethyl-2-4-dioxohexanoate	1	1073	1082	1278	Ethyl dioxohexanoate		Ethyl dioxohexanoate; Ethyl 2,4-dioxohexanoate;	Ethyl 2,4-diketocaproate; Ethyl propionyl pyruvate;	Burnt sugar-caramel aroma with fruity-floral-lactonic notes	C8 H12 O4	172.178	13246-52-1	Artificial	Not considered Nature Identical by IOFI	Boelens indicates -burnt, somewhat caramellic-fruity odor (PMP 2001); fruity, burnt sugar flavor (FRM 2001) In United States Patent 3860727 (January 14, 1975) by Hajos & Parrish entitled "Perfume and flavored compositions containing ethyl 2,4-dioxohexanoate" it is disclosed that ethyl 2,4-dioxohexanoate is reminscent of the odors of burnt caramel, opopanax, Cassia absolute, Genet absolute, Tubero…	odorant					aroma	burnt sugar	caramellic	aroma	fruity	floral	lactonic						1	0	0	1	0	0	0	0	0	0	0	0
1	1	1	CCO\\C(C)=C\\C(=O)OCC	achiral	ethyl-ethoxycrotonate	1	1076	1085	1282	Ethyl ethoxycrotonate		Ethyl ethoxycrotonate; Ethyl trans-3-ethoxycrotonate	ethyl (2E)-3-ethoxybut-2-enoate	Slight chamomille, caramellic fruity apple type note	C8 H14 O3	158.195	57592-45-7	Artificial	#N/A	This is the ethyl enol ether of ethyl acetoacetate. 1772 O NH O	odorant		l'image ne correspond pas au synonym et name ethyl (E)-3-ethoxybut-2-enoate ; la structure gardée est celle de name et synonym IUPAC ethyl (E)-3-ethoxybut-2-enoate			unspecified odorant	weak	chamomile	caramellic	fruity	apple							1	0	0	0	1	0	0	0	0	0	0	0
1	1	1	CCOC(=O)CCC1=CC=CO1	achiral	Ethyl-furylpropanoate	1	1090	1099	1300	Ethyl furylpropanoate		Ethyl furylpropanoate; Ethyl 3-(2-furyl)propanoate;	Ethyl 2-furanpropionate; Ethyl furfurylacetate; Ethyl furylpropionate;	Fruity, green, woody, unripe fruit; pineapple, chamomile-like	C9 H12 O3	168.19	10031-90-0	Nature Identical	Rum.	This material was removed from the 4th Edition of the Council of Europe List (1992); it formerly had COE # 2091. Bedoukian indicates: A fruity pineapple flavor. Used in pineapple and apple flavors. Mosciano, et. al. (Perfumer & Flavorist, Vol. 18, November-December, 1993, p. 34) describe the odor as "Sweet, fruity, pineapple, ripe, acrylate rummy note, horseradish and slightly cooked jammy nuance…	odorant					unspecified odorant	fruity	green	woody	unripe fruit	pineapple	chamomile						1	0	1	0	0	0	0	0	0	1	0	0
1	1	1	CCCCCC(=O)OCC	achiral	Ethyl-hexanoate	1	1097	1106	1310	Ethyl hexanoate		Ethyl hexanoate; Ethyl caproate;	Hexanoic acid, ethyl ester; Capronic ether absolute;	Strong, fruity, pineapple, banana with strawberry, pear & tropical notes	C8 H16 O2	144.211	123-66-0	Nature Identical	Apple, Cherry, Grape Brandy, Kiwi, Mango, Peach, Pineapple, Plum, Raspberry, Wine, Green (immature) beans	Odor threshold in water: 1 ppb in water Horst Surburg, Johannes Panten indicate -a strong fruity odor reminscent of pineapple (Common fragrance and flavor materials, 5th Ed., Wiley-VCF, 2006, p. 22) Frutarom describes the odor/flavor properties as Pineapple, Strawberry, W ine. Interchim describes the odor/flavor properties as Fruity, apple, banana, tomato. Oxford (now Frutarom) indicates: Odour D…	odorant					unspecified odorant	strong	fruity	pineapple	banana	strawberry	pear	tropical fruit					1	0	0	0	0	0	0	1	0	0	0	0
1	1	1	CCOC(=O)CCCC=C	achiral	Ethyl-5-hexenoate	1	1099	1108	1314	Ethyl 5-hexenoate		Ethyl hexenoate; Ethyl 5-hexenoate;	Ethyl hex-5-enoate	Sweet juicy, fruity, pineapple, green; ripe jammy strawberry, apple notes	C8 H14 O2	142.196	54653-25-7	Nature Identical	Pineapple, Chinese Quince peel, Guava	Mosciano (2003) indicates: Odor: @ 1.0 percent. Sweet, sharp estry with ripe fruity pineapple, strawberry and apple, with winey and acidic depth notes. Taste: @ 5 to 10 PPM. Sweet, jamy overripe fruity, pineapple, and strawberry with sweet onenanthic tutti frutti candy nuances. Fontarome indicates -fruity, pineapple odor In WO0113742 (A1), Jan. 3, 2001 by Dewis et al., Ethyl hex-5-enoate was isol…	odorant					unspecified odorant	sweet	juicy	fruity	pineapple	green	ripe jam strawberry	apple					1	1	1	0	0	0	0	0	0	0	0	0
1	1	1	CCOC(=O)C\\C=C/CC	achiral	ethyl-Z-3-hexenoate	1	1100	1109	1315	Ethyl cis-3-hexenoate		Ethyl hexenoate; Ethyl cis-3-hexenoate	Ethyl (Z)-3-hexenoate; Ethyl (3Z)-hexenoate	Sweet, fruity, pear, green, apple, fresh, tropical, pineapple	C8 H14 O2	142.196	64187-83-3	Nature Identical*	Pineapple, Cognac, Grape brandy, Cider, Red wine, Passion fruit (purple & Yellow), Mastic gum leaf oil; The WGMA has been working on the identification of this substance. The status of this substance is still under discussion. Not considered Nature Identical by IOFI	Note* -at the time of this writing, this material has been assigned an EC Flavis number, but not officially been placed on the EC Register List. The Flavis number is 09.939 Bedoukian indicates: Odor Description: Sharp, pear, green, apple, tropical, good for rind notes, pineapple Fragrance Use: Use for rind or green notes in fruity applications. Flavor Use: Use in strawberry or in tropicals such a…	odorant					unspecified odorant	sweet	fruity	pear	green	apple	fresh	tropical fruit	pineapple				1	1	1	0	0	0	0	0	0	0	0	0
1	1	1	CCOC(=O)C(C)(O)CC	achiral	ethyl-2-hydroxy-2-methylbutyrate	1	1107	1116	1325	Ethyl 2-hydroxy-2-methylbutyrate		Ethyl hydroxymethylbutyrate; Ethyl 2-hydroxy-2-methylbutyrate	(+/-)-Ethyl 2-hydroxy-2-methylbutyrate; Ethyl 2-hydroxy-2-methylbutanoate Ethyl 2-ethyllactate	Caramel, fruity, nutty	C7 H14 O3	146.184	77-70-3	Nature Identical	Pineapple	The author is unfamiliar with this material but expects it also to be carameized-fruity. JECFA indicates -Caramelised, nutty aroma Probable use is in caramel & fruit flavors. Summary of Evaluations Performed by the Joint FAO/WHO Expert Committee on Food Additives: 68th meeting of the Joint FAO/WHO Expert Committee on Food Additives (JECFA) held in June 2007 -Conclusions based on current estimated…	odorant					unspecified odorant	caramellic	fruity	nutty									1	0	0	0	0	0	0	0	0	0	0	0
1	1	1	CCCC(O)CCCC(=O)OCC	achiral	ethyl-5-hydroxyoctanoate	1	1112	1121	1332	Ethyl 5-hydroxyoctanoate		Ethyl hydroxyoctanoate; Ethyl 5-hydroxyoctanoate		Pineapple, fatty; Forms delta-octalactone enzymatically or with heat	C10 H20 O3	188.264	75587-05-2	Nature Identical	Pineapple	This material will form delta-octalactone under enzymatic conditions or when heated in cooking oil. Katsumi Umano, Yukio Hagi, Kazuaki Nakahara, Akihiro Shoji, and Takayuki Shibamoto, Volatile Constituents of Green and Ripened Pineapple (Ananas comosus[L.] Merr.), J. Agrlc. Food Chem. 1992, 40, 599-603 have reported this in pineapple. Probable use is in dairy & fruit flavors. JECFA indicates -Swe…	odorant					unspecified odorant	pineapple	fatty										0	0	0	0	0	1	0	0	0	0	0	0
1	1	1	CCOC(=O)C(C)C	achiral	Ethyl-2-methylpropanoate	1	1113	1122	1335	Ethyl isobutyrate		Ethyl isobutyrate; Ethyl 2-methylpropanoate;	Ethyl 2-methylpropionate; Ethyl isobutanoate; 2-Methylpropanoic acid, ethyl ester; Isobutanoic acid, ethyl ester;	Sweet, ethereal, fruity rum like odor and taste; apple notes	C6 H12 O2	116.158	97-62-1	Nature Identical	Apple, Banana, Durian, Fig, Grape, Grape Brandy, Plum, Rum, Sherry, Strawberry.	Odor threshold in water: 0.1 ppb. Boelens indicates -sweet, fruity, ethereal, with a rum like nuance odor/ flavor (PMP 2001 & FRM 2001) Mosciano, et. al. (1993) report that this material has a "sweet, ethereal fruity with a good lift" odor and a "sweet, ethereal fruity with a rum like nuance" taste at 20 ppm. (Perfumer & Flavorist, Vol. 15, Septembar/October 1993, pp. 48-49) In another evaluation…	odorant + taste					odor idem taste	sweet	ethereal	fruity	rum	odor	taste	apple					1	1	0	0	0	0	0	0	0	0	0	0
1	1	1	CCOC(=O)CCC(C)C	achiral	ethyl-isohexanoate	1	1114	1123	1336	Ethyl isohexanoate		Ethyl isohexanoate; ethyl 4-methylpentanoate	Ethyl isocaproate	Fruity, pineapple-apple notes	C8 H16 O2	144.211	25415-67-2	Nature Identical	Cheese (Gruyere), Cocoa, Sake, Bavarian Pilsner-type Beer	Odor threshold in water = 0.01-4.3 ppb -(van Gemart, L.J., Compilations of odour threshold values in air & water & other, Publisher: Oliemans Punter & Partners, The Netherlands, 2003 Edition) Fritsch, H. T.; Schieberle, P., Identification Based on Quantitative Measurements and Aroma Recombination of the Character Impact Odorants in a Bavarian Pilsner-type Beer, J. Agric. Food Chem. 2005, 53, 7544…	odorant					unspecified odorant	fruity	pineapple	apple									1	0	0	0	0	0	0	0	0	0	0	0
1	1	1	CCOC(=O)CCC1(C)OCC(C)O1	achiral	ethyl-levulinate-propylene-glycol-ketal	1	1119	1128	1343	Ethyl levulinate propylene glycol ketal		Ethyl levulinate propylene glycol ketal	ethyl 3-(2,4-dimethyl-1,3-dioxolan-2-yl)propanoate; ethyl levulinate propyleneglycol acetal	Weak, caramellic, fruity, non-discript	C10 H18 O4	202.248	57197-36-1	Artificial	#N/A	Often found in flavors that contain propylene glycol and ethyl levulinate (after aging). JECFA indicates -Oily carmellic aroma Normal use levels in finished products: Baked goods (10/200 ppm); non-alcoholic beverages (1/10 ppm); Chewing gum (100/500 ppm); Fats/Oils, Soft candy (10/50 ppm); Frozen dairy (5/50 ppm); Gelatins/Puddings (2/20 ppm); Hard candy (10/100 ppm). (Average/Maximum) See FEMA G…	odorant					unspecified odorant	weak	caramellic	fruity									1	0	0	0	1	0	0	0	0	0	0	0
1	1	1	CCOC(=O)CCC(C)=O	achiral	Ethyl-4-oxopentanoate	1	1120	1129	1344	Ethyl levulinate		Ethyl levulinate; Ethyl 4-oxopentanoate;	Ethyl 4-ketovalerate; Ethyl acetylpropanoate; Levulinic acid, ethyl ester;	Mild, fruity, caramelic, sweet green, apple-tropical; unripe-apple taste	C7 H12 O3	144.168	539-88-8	Nature Identical	Cocoa, Grape Brandy, Rum, Wheat Bread, Wine.	Mosciano, et. al. report that this material has a "fruity, green, melon-like with waxy notes" odor and a "fruity, green, waxy and melon" taste at 40 ppm. (Perfumer & Flavorist, Vol. 15, Jan./Feb. 1990, p. 20) Interchim describes the odor/flavor properties as Fruity, green, pineapple, rhubarb. Bedoukian indicates: Odor Description: An ethereal fruity odor with savory backnotes. Fragrance Use: Blen…	odorant + taste					unspecified odorant diff taste	mild	fruity	caramellic	sweet	green	apple	tropical fruit					1	1	1	0	0	0	0	0	0	0	1	0
1	1	1	CCCC(=O)OC1=C(CC)OC=CC1=O	achiral	ethyl-maltol-butyrate	1	1125	1134	1349	Ethyl maltol butyrate		Ethyl maltol butyrate; 2-ethyl-4-oxo-4H-pyran-3-yl butyrate	2-ethyl-4-oxo-4H-pyran-3-yl butanoate	Caramellic, fruity, berry	C11 H14 O4	210.226	93805-72-2	Artificial	#N/A	A caramel-like, fruity, berry note. Used in strawberry, blueberry and raspberry flavors. Also can find minor use in roasted flavors. 1856 O CH3 O CH3 O O CH3	odorant					unspecified odorant	caramellic	fruity	berry									1	0	0	0	0	0	0	0	0	0	0	0
1	1	1	CCC1=C(OC(=O)C(C)C)C(=O)C=CO1	achiral	ethyl-maltol-isobutyrate	1	1126	1135	1350	Ethyl maltol isobutyrate		Ethyl maltol isobutyrate;	2-ethyl-4-oxo-4H-pyran-3-yl isobutyrate; 2-ethyl-4-oxo-4H-pyran-3-yl 2-methylpropionate; 2-ethyl-4-oxo-4H-pyran-3-yl 2-methylpropanoate	Sweet, caramellic, strawberry-like, tropical odor and taste	C11 H14 O4	210.226	852997-28-5	Artificial	#N/A	A caramel-like, fruity, strawberry note. Used in strawberry, blueberry and raspberry flavors. Also can find use in roasted & maple flavors. Normal use levels in finished products: Baked goods, Fats/Oils, Hard candy & Snack foods at 5-50 ppm. See FEMA GRAS list No. 24 for specific details. 1857 O O CH3 O O CH3	odorant + taste					odor idem taste	sweet	caramellic	strawberry	tropical fruit	odor	taste						0	1	0	0	0	0	0	0	0	0	0	0
1	1	1	CCC(=O)OC1=C(CC)OC=CC1=O	achiral	ethyl-maltol-propanoate	1	1127	1136	1351	Ethyl maltol propionate		Ethyl maltol propionate; 2-ethyl-4-oxo-4H-pyran-3-yl propionate	2-ethyl-4-oxo-4H-pyran-3-yl propanoate	Caramellic, fruity, strawberry	C10 H12 O4	196.2		Artificial	#N/A	A caramel-like, fruity, strawberry note. Used in strawberry, blueberry and raspberry flavors. Also can find minor use in roasted flavors. 1858 O OH O	odorant					unspecified odorant	caramellic	fruity	strawberry									1	0	0	0	0	0	0	0	0	0	0	0
1	1	1	CCC1=C(O)C(=O)C=CO1	achiral	Ethyl-maltol	1	1128	1137	1352	Ethyl maltol		Ethyl maltol; Veltol Plus*	2-Ethylpyromeconic acid; 3-Hydroxy-2-ethyl-4-pyrone; 3-Ethyl-2-hydroxy-4H-Pyran-4-one; Ethyl Veltol (PFIZ); *Veltol Plus (trademark of Pfizer);	Sweet, fruity-caramellic cotton candy odor; fruity preserve taste	C7 H8 O3	140.137	4940-11-8	Artificial	Not considered Nature Identical by IOFI	This material is similar in its odor and flavor profile as Maltol (FEMA# 2656) except it is about 3 -6 times stronger in effect. Mosciano, et. al. report that this material has a "sweet, sugary, caramellic, jamy, strawberry like" odor and a "sweet, burnt cotton sugar candy like, with jamy, strawberry notes" taste at 70 ppm. (Perfumer & Flavorist, Vol. 16, Jan./Feb. 1991. p. 32) Boelens indicates …	odorant + taste					odor diff taste	sweet	fruity	caramellic	cotton candy	odor							1	1	0	0	0	0	0	0	0	0	0	0
1	1	1	CCOC(=O)C(C)CC	achiral	Ethyl-2-methylbutyrate	1	1144	1153	1368	Ethyl methylbutyrate		Ethyl methylbutyrate; Ethyl 2-methylbutyrate;	Ethyl 2-methylbutanoate; 2-methylbutanoic acid, ethyl ester;	Strong, green, fruity, apple odor and taste; also some strawberry notes	C7 H14 O2	130.185	7452-79-1	Nature Identical	Apple, Cider, Durian, Grape, Grape Brandy, Melon, Strawberry, Wine .	Symrise indicates: Odor Description: estery, very fruity, reminiscent of papaya, apple, quince, apricot and strawberry Flavor Description: estery, very fruity, juicy, sweet, apple-and strawberry-like Useful in: fruity citrus, fruity red, fruity yellow, fruity tropical, fruity others, alcoholics Interchim describes the odor/flavor properties as Green, fruity. Citrus & Allied describe the odor as: …	odorant + taste					odor idem taste	strong	green	fruity	apple	odor	taste	strawberry					1	0	1	0	0	0	0	1	0	0	0	0
1	1	1	CCOC(=O)C(C)SSC	achiral	Ethyl-2-methyldithiopropionate	1	1145	1154	1369	Ethyl methyldithiopropionate		Ethyl methyldithiopropionate; Ethyl 2-(methyldithio)propionate		Sulfurous, green, onion; fruity (tropical-pineapple) in extreme dilution	C6 H12 O2 S2	180.29	23747-43-5	Nature Identical	Cocoa	Great Britain Patent 1246644 (September 15, 1971) assigned to Polak Frutal Works describe this as onion, sulphurous green at 0.04 ppm in water. Boelens indicates -sulphurous, fruity note (FRM 2001) The Good Scents Co. indicates -sulfury fruity odor Used in green onion and other allium flavors, pineapple, tropical fruit, durian. This material appeared in the addendum to the 3d Edition of the Counc…	odorant					unspecified odorant	sulfuraceous	green	onion	fruity	tropical fruit	pineapple						1	0	1	0	0	0	0	0	0	0	0	1
1	1	1	CCCC(C)C(=O)OCC	achiral	Ethyl-2-methylpentanoate	1	1148	1157	1372	Ethyl 2-methylpentanoate		Ethyl methylpentanoate; Ethyl 2-methylpentanoate;	Ethyl 2-methylvalerate; 2-Methylpentanoic acid, ethyl ester; Manzanate	Pineapple, fruity, green, melon, pear and waxy	C8 H16 O2	144.211	39255-32-8	Nature Identical	Mobola plum (Parinari curatellifolia), Madeira wine	Odor threshold = 0.003 ppb Mosciano et. al. (1994) describes the odor as "fruity, green, melon and waxy with a fatty nuance" and taste (at 30 ppm) as "cooling, green, cucumber, tropical and oily". (Perfumer & Flavorist, Vol. 19, May/June 1994. p. 51) Interchim describes the odor/flavor properties as fruity. Givaudan indicates -Olfactive note: Fruity, Apple, Pineapple Description: Manzanate has a …	odorant					unspecified odorant	pineapple	fruity	green	melon	pear	waxy						1	0	1	0	0	0	0	0	1	0	0	0
1	1	1	CCOC(=O)CC(C)CC	achiral	Ethyl-3-methylpentanoate	1	1149	1158	1373	Ethyl 3-methylpentanoate		Ethyl methylpentanoate; Ethyl 3-methylpentanoate;	Ethyl 3-methylvalerate;	Fruity, pineapple odor; fruity flavor	C8 H16 O2	144.211	5870-68-8	Nature Identical	Cheese, Cashew apple juice, Wine	Bedoukian indicates: A natural pineapple, fruity odor. Finds use in apple, pineapple and other fruit flavors. Boelens indicates -fruity, somewhat caprylic, cheese-like odor/flavor (PMP 2001 & FRM 2001) The Good Scents Co. indicates -pineapple fruity odor Also described as fruity, anise by GC-O (Eva Campo, Juan Cacho, and Vicente Ferreira, The Chemical Characterization of the Aroma of Dessert and …	odorant					odor diff flavor	fruity	pineapple	odor									1	0	0	0	0	0	0	0	0	0	0	0
1	1	1	CCOC(=O)C(C)CC=C	achiral	Ethyl-2-methyl-4-pentenoate	1	1151	1160	1377	Ethyl 2-methyl-4-pentenoate		Ethyl methylpentenoate; Ethyl 2-methyl-4-pentenoate;	Ethyl 2-methylpent-4-enoate; 2-Methyl-4-pentenoic acid, ethyl ester;	Fruity-pineapple-like tropical odor, tiglale like	C8 H14 O2	142.196	53399-81-8	Artificial	Not considered Nature Identical by IOFI	Odor threshold in water = 7-13 ppm Bedoukian indicates: Odor Description: A pineapple odor similar to a tiglate. Fragrance Use: Used in specialty compositions. Flavor Use: Used in various fruit flavors particularly pineapple and other tropical flavors. Bedoukian indicates for this material plus Ethyl 2-methyl-3-pentenoate: Odor Description: An ethereal fruity odor. Fragrance Use: Used in fragranc…	odorant					odor	fruity	pineapple	tropical fruit	odor	tiglate							1	0	0	0	0	0	0	0	0	0	0	0
1	1	1	CCOC(=O)CC=C(C)C	achiral	Ethyl-4-methylpent-3-enoate	1	1152	1161	1378	Ethyl 4-methylpent-3-enoate		Ethyl methylpentenoate; Ethyl 4-methylpent-3-enoate		Fruity, green, apple, berry, strawberry, mixed fruit	C8 H14 O2	142.196	6849-18-9	Nature Identical	Cocoa, Wine	Boelens indicates: fruity, berry-like, strawberry connotation odor (PMP 2001); fruity, estery, somewhat green (FRM 2001). Useful in Apple, Banana, Pineapple, Strawberry and other fruit flavors. This material appeared in the addendum to the 3d Edition of the Council of Europe List (1981) with a "10000" series number for Flavoring substances not fully evaluated (assigned numbers 10,001 upwards). Ac…	odorant					unspecified odorant	fruity	green	apple	berry	strawberry	mixed fruit						1	0	1	0	0	0	0	0	0	0	0	0
1	1	1	CCOC(=O)C1OC1(C)C2=CC=CC=C2	achiral	Ethyl-methylphenylglycidate	1	1153	1162	1379	Ethyl methylphenylglycidate		Ethyl methylphenylglycidate; Aldehyde C-16 (so-called);	Ethyl-3-methyl-3-phenylglycidate; Ethyl 2,3-epoxy-3-methyl-3-phenylpropionate; Strawberry aldehyde; Ethyl 2,3-epoxy-3-methyl-3-phenylpropionate; Ethyl beta-methyl-beta-phenylglycidate	Sweet, fruity-strawberry, candy-like odor; strawberry-like taste	C12 H14 O3	206.238	77-83-8	Artificial	Not considered Nature Identical by IOFI	Mosciano indicates: Odor -Sweet, fruity strawberry-like with floral honey undertones. Taste @ 50 ppm. Sweet, berry, strawberry, fruity, tuti frutti and floral nuances. Suggested Applications -Strawberry, raspberry, cherry, grape, apricot, peach. (Perfumer & Flavorist, Vol. 17, Jan./Feb.1992, p. 44) Mosciano (2003) also indicates: "Odor: @ 1.0% -Sweet, fruity strawberry, berry with a slight cooked…	odorant + taste					odor diff taste	sweet	fruity	strawberry	candy	odor							1	1	0	0	0	0	0	0	0	0	0	0
1	1	1	CCCCCC\\C=C\\C(=O)OCC	achiral	ethyl-E-2-nonenoate	1	1165	1174	1396	Ethyl 2-nonenoate		Ethyl nonenoate; Ethyl 2-nonenoate		Green, fruity, pineapple-pear notes & fatty waxy undertone	C11 H20 O2	184.275	17463-01-3	Nature Identical	Beer	Boelens indicates: green, fruity, lightly fatty Probable use is in fruit flavors. 1927 O H3C CH3 O	odorant					unspecified odorant	green	fruity	pineapple	pear	fatty	waxy						1	0	1	0	0	1	0	0	1	0	0	0
1	1	1	CCOC(=O)CC\\C=C/CC=C	achiral	Ethyl-cis-4-7-octadienoate	1	1168	1177	1399	Ethyl octadienoate		Ethyl octadienoate; Ethyl cis-4,7-octadienoate;	Ethyl (Z)-4,7-octadienoate;	Fruity, pineapple pear-like	C10 H16 O2	168.233	69925-33-3	Nature Identical	Passion Fruit, Monstera deliciosa	Boelens indicates -green fruity, slightly fatty odor/flavor (PMP 2001 & FRM 2001) The Good Scents Co. indicates -pineapple odor Burdock indicates -a fresh full-bodied top note & pineapple-like odor. (Fenaroli’s Handbook of Flavor Ingredients, Fifth Edition, CRC Press, 2004, p. 614) United States Patent 4,304,793 by Naf, et al. December 8, 1981 assigned to Firmenich indicates this material develop…	odorant					unspecified odorant	fruity	pineapple	pear									1	0	0	0	0	0	0	0	0	0	0	0
1	1	1	CCC\\C=C/CCC(=O)OCC	achiral	Ethyl-cis-4-octenoate	1	1170	1179	1401	Ethyl cis-4-octenoate		Ethyl octenoate; Ethyl cis-4-octenoate;	Ethyl (Z)-4-octenoate; Ethyl oct-4-enoate	Fruity, fatty, green, pineapple, pear	C10 H18 O2	170.249	34495-71-1	Nature Identical	Passion Fruit, Pineapple.	Listed as Ethyl oct-4-enoate (no isomers specified) on the 2004 EC Register list and on the Japanese Flavor List. Current reccomendation is that only the cis isomer is to be allowed on the EC Register list (as of 2009). This material (cis-isomer) is described in United States Patent No. 3,928,402 by Ferdinand Naf (December 23, 1975) as "fruity, fatty, green, pineapple, pear". Boelens indicates -f…	odorant					unspecified odorant	fruity	fatty	green	pineapple	pear							1	0	1	0	0	1	0	0	0	0	0	0
1	1	1	CCCCC\\C=C\\C(=O)OCC	achiral	Ethyl-trans-2-octenoate	1	1171	1180	1403	Ethyl trans-2-octenoate		Ethyl octenoate; Ethyl trans-2-octenoate	Ethyl (E)-2-octenoate; Ethyl trans-oct-2-enoate; trans-2-Octenoic acid, ethyl ester;	Fruity, green, pineapple-pear, juicy tropical notes	C10 H18 O2	170.249	7367-82-0	Nature Identical	Apple, Grape, Pear, Soursop.	Mosciano, et. al. (1993), have described the organoleptic properties as follows: Odor as "Fruity, pineapple, green with a fatty waxy nuance" and taste as "Fruity, green, pineapple with a juicy tropical note" at 30 ppm. (Perfumer & Flavorist, Vol. 18, Jan./Feb. 1993, pp. 43-44) Interchim describes the odor/flavor properties as Green, cheesy odor. Bedoukian indicates: Odor Description: A fruity, pi…	odorant					unspecified odorant	fruity	green	pineapple	pear	juicy	tropical fruit						1	0	1	0	0	0	0	0	0	0	0	0
1	1	1	CCCC\\C=C\\CC(=O)OCC	achiral	Ethyl-trans-3-octenoate	1	1172	1181	1404	Ethyl trans-3-octenoate		Ethyl octenoate; Ethyl trans-3-octenoate; Ethyl (E)-3-octenoate;	Ethyl trans-oct-3-enoate	Fruity, fatty tropical notes, somewhat pineapple, passion fruit	C10 H18 O2	170.249	26553-47-9	Nature identical	Pineapple, Purple passion fruit juice, Ceratitis capitata (Medfly, pheromone of), Strawberry Guava (Psidium cattleianum Sabine) Fruit	Previously assigned Flavis No. 09.376 *Note -COMMISSION DECISION of 7 April 2004 amending Decision 1999/217/EC as regards the EC register of flavouring substances: Deleted from list as it is covered under 09.377. Givaudan indicates -Fruity, with a bit fatty notes. Recommended application -pineapple, passion fruit Recommended use level -5 ppm Boelens indicates -fruity, slightly fatty, somewhat pin…	odorant					unspecified odorant	fruity	fatty	tropical fruit	pineapple	passion fruit							1	0	0	0	0	1	0	0	0	0	0	0
1	1	1	CCCC(=O)CC(=O)OCC	achiral	Ethyl-3-oxohexanoate	1	1175	1184	1408	Ethyl oxohexanoate		Ethyl oxohexanoate; Ethyl 3-oxohexanoate;	Ethyl butyrylacetate; Ethyl beta-ketohexanoate; Ethyl 3-ketohexanoate; 3-ketohexanoic acid, ethyl ester;	Fruity, green, berry like, pineapple odor	C8 H14 O3	158.195	3249-68-1	Artificial	Not considered Nature Identical by IOFI	Mosciano, et. al. report that this material has a "sweet, green, sweaty with fruity notes" odor and a "fruity, pineapple, green, and sweet licorice and vanilla notes" taste at 50 ppm. (Perfumer & Flavorist, Vol. 15, Jan./Feb. 1990, p. 20) Boelens indicates -fruity, green, musty, berry-like (PMP 2001); green fruity, must, berry-like; pineapple, sweet licorice and vanilla notes flavor (FRM 2001) Th…	odorant					odor	fruity	green	berry	pineapple	odor							1	0	1	0	0	0	0	0	0	0	0	0
1	1	1	CCOC(=O)C1OC1C2=CC=CC=C2	achiral	Ethyl-3-phenylglycidate	1	1185	1194	1421	Ethyl phenylglycidate		Ethyl phenylglycidate; Ethyl 3-phenylglycidate;	Ethyl alpha,beta-Epoxy-beta-phenylpropionate; Ethyl 2,3-epoxy-3-phenylpropionate; EPG;	Fruity, berry, somewhat caramellic odor; sweet cooked strawberry notes	C11 H12 O3	192.211	121-39-1	Artificial	Not considered Nature Identical by IOFI	Allured's Perfumer's Compendium (1996) & The IFF Perfumers Compendium describe this material as "a sweet strawberry note, but sweeter and finer than ethyl methylphenylglycidate". Boelens indicates -fruity, strawberry, fermented, honey odor (PMP 2001); fruity, strawberry, fermented, honey; dried fruit & floral nuance flavor (FRM 2001) IFF indicates: Odor Profile -Fruity, Strawberry, Green Olfactor…	odorant					odor	fruity	berry	caramellic	odor	sweet	cooked strawberry						1	1	0	0	0	0	0	0	0	0	0	0
1	1	1	CCOC(=O)C(C)=O	achiral	Ethyl-pyruvate	1	1196	1205	1433	Ethyl pyruvate		Ethyl pyruvate; Ethyl 2-oxopropionate;	Ethyl 2-oxopropanoate; Ethyl alpha-Ketopropionate; Ethyl acetylformate;	Sweet, fruity-caramellic odor; rum-spicy-caramellic taste	C5 H8 O3	116.115	617-35-6	Nature Identical	Cocoa, Grape Brandy, Wheat Bread, Wine.	Mosciano, et. al. report for a natural sample that this material has a "ethereal, fruity, sweet, with a sharp rum-like top note" odor and a "sweet, rum-like with a fruity ethereal nuance" taste at 60 ppm. (Perfumer & Flavorist, Vol. 16, Jan./Feb. 1991, p. 32) Mosciano (2001) also indicates: Odor: Ethereal, sweet, fruit cake, rum, caramellic, vanilla, casky nuances, fermented, wine with grape nuan…	odorant + taste					odor diff taste	sweet	fruity	caramellic	odor								1	1	0	0	0	0	0	0	0	0	0	0
1	1	1	CCOC(=O)C=C(C)C	achiral	Ethyl-3-methylcrotonate	1	1200	1211	1437	Ethyl senecioate		Ethyl senecioate; Ethyl methylcrotonate; Ethyl 3-methylcrotonate	Ethyl 3-methylbut-2-enoate	Sweet, fruity, apple, chamomille, pineapple	C7 H12 O2	128.169	638-10-8	Nature Identical	Cocoa, Wild blueberries, Cashew apple, Binjai	Odor theshold = 25 ppb in water Boelens indicates -fruity, herbal; camomile note odor/flavor (FRM 2001) The flavor is fruity, pineapple, green, apple skin (see Coffee Flavor Chemistry by Ivon Flament, Yvonne Bessière-Thomas, Wiley, 2001, p. 179) Primarily used in rum, fruit, caramel flavors. This material appeared in the addendum to the 3d Edition of the Council of Europe List (1981) with a "1000…	odorant					unspecified odorant	sweet	fruity	apple	chamomile	pineapple							1	1	0	0	0	0	0	0	0	0	0	0
1	1	1	CCOC(=O)\\C(C)=C\\C	achiral	Ethyl-trans-2-methylbut-2-enoate	1	1203	1214	1441	Ethyl tiglate		Ethyl tiglate; Ethyl trans-2-methylbut-2-enoate;	Ethyl trans-2-Methylcrotonate; Ethyl trans-2-Methyl-2-butenoate;	Fruity, caramellic, mixed fruit odor and taste	C7 H12 O2	128.169	5837-78-5	Nature Identical	Geranium Rose Oil, Mango, Quince.	Interchim describes the odor/flavor properties as Fruity, pear, apple odor and taste. Caramel note. Bedoukian indicates: Odor Description: Initially fruity with an earthy backnote reminiscent of green olives. Fragrance Use: Useful for its warm, nutty, earthy character. Flavor Use: Used in mushroom, olive, corn, mustard and vegetable flavors. Boelens indicates -fruity, herbal; rural aspects, caram…	odorant + taste					odor idem taste	fruity	caramellic	mixed fruit	odor	taste							1	0	0	0	0	0	0	0	0	0	0	0
1	1	1	CCCCC(=O)OCC	achiral	Ethyl-pentanoate	1	1208	1219	1447	Ethyl valerate		Ethyl valerate; Ethyl pentanoate;	Ethyl valerianate; Pentanoic acid, ethyl ester; Valeric acid, ethyl ester;	Strong, fruity, apple-pineapple-tropical like odor and taste	C7 H14 O2	130.185	539-82-2	Nature Identical	Black Currants, Grape, Grape Brandy, Pineapple, Sherry, Strawberry, Whiskey, W ine.	Odor threshold in water: 1.5 ppb. Frutarom describes the odor/flavor properties as Apple, Fermented, Berry. Boelens indicates -fruity, winey, caprylic, fermented, slightly fatty odor/flavor (PMP 2001 & FRM 2001) Mosciano, et. al. (1998) describe the Odor Characteristics as Sweet, fruity, acidic, pineapple, apple, green, berry and tropical and the Taste Characteristics @ 30 ppm as Fruity, strawber…	odorant + taste					odor idem taste	strong	fruity	apple	pineapple	tropical fruit	odor	taste					1	0	0	0	0	0	0	1	0	0	0	0
1	1	1	CCC(CC)C=O	achiral	2-Ethylbutyraldehyde	1	1220	1231	1462	Ethylbutyraldehyde		Ethylbutyraldehyde; 2-Ethylbutyraldehyde; 2-Ethylbutanal;	Diethylacetaldehyde; 2-Ethylbutan-1-al;	Pungent; fresh, cocoa, green-fruity, caramellic odor and taste	C6 H12 O	100.159	97-96-1	Nature Identical	Corn, Orange, Wheat Bread.	Mosciano, et. al. report that this material has a "sweet, green, ethereal lift, fruity with a cocoa nuance" odor and a "green, fruity, cocoa, with sweet fresh nuances" taste at 20 ppm. (Perfumer & Flavorist, Vol. 15, March/April 1990, p. 71) The Good Scents Co. indicates -sweet green ethereal fruity cocoa odor @ 10% dilution Boelens indicates -fresh, aldehydic, caprylic odor (PMP 2001); green, fr…	odorant + taste					odor idem taste	pungent	fresh	cocoa	green fruity	caramellic	odor	taste					0	0	0	0	0	0	0	0	0	0	0	0
1	1	1	CCC1=C(O)C(=O)CC1	achiral	Ethylhydroxycyclopentenone	1	1253	1264	1501	Ethylhydroxycyclopentenone		Ethylhydroxycyclopentenone; Ethylcyclopentenolone;	3-Ethyl-2-hydroxy-2-cyclopenten-1-one; Ethyl cyclotene; 3-Ethyl-2-cyclopenten-2-ol-1-one; 3-Ethyl-1,2-cyclopentanedione;	Sweet caramel-maple like odor and taste	C7 H10 O2	126.153	21835-01-8	Nature Identical	Coffee, Tobacco and Tobacco Smoke, Pork (cured, boiled)	This material is the ethyl analog of Methylcyclopentenolone (FEMA# 2700) and possesses a stronger (about 2X) but similar odor and taste. Firmenich indicates: Powerful caramelic, walnut, coffee and toasted bread notes. It adds caramel, walnut, coffee, toasted bread profile along with interesting warm effects to coffee, vanilla, chocolate, nut, meat and red fruit flavors. Recommended dosage in fina…	odorant + taste					odor idem taste	sweet	caramellic	maple	odor	taste							0	1	0	0	0	0	0	0	0	0	0	0
1	1	1	CCC1=C(O)C(=O)CC1C	achiral	3-Ethyl-4-methylcyclotene	1	1254	1265	1502	3-Ethyl-4-methylcyclotene		Ethylhydroxymethylcyclopentenone; 3-Ethyl-4-methylcyclotene;	3-Ethyl-2-hydroxy-4-methylcyclopent-2-en-1-one; Ethylmethylcyclotene; Ethylmethylcyclopentenolone;	Burnt, caramellic, maple-like odor; burnt sugar, maple-caramel taste	C8 H12 O2	140.18	42348-12-9	Nature Identical	Smoke, Coffee	Boelens indicates -aromatic, roasted, burnt, fried odor (PMP 2001); roasted, somewhat burnt sugar; slightly phenolic flavor (FRM 2001) The Good Scents Co. indicates -sweet maple odor Also described as "sweet, maple-like" (Ivon Flament, Yvonne Bessière-Thomas, Coffee flavor chemistry, Wiley & Sons, 2001, p. 141) This material is an analog of the types of cyclopentanediones found in coffee, tobacco…	odorant + taste					odor diff taste	burned	caramellic	maple	odor								0	0	0	0	0	0	0	0	0	0	0	0
1	1	1	CCC1CC(=C(O)C1=O)C	achiral	5-Ethyl-3-methylcyclotene	1	1255	1266	1503	5-Ethyl-3-methylcyclotene		Ethylhydroxymethylcyclopentenone; 5-Ethyl-3-methylcyclotene;	5-Ethyl-2-hydroxy-3-methylcyclopent-2-en-1-one; 5-Ethyl-3-methylcyclopentenolone;	Burnt, malty, caramellic, maple odor	C8 H12 O2	140.18	53263-58-4	Artificial*	Coffee	Boelens indicates -roasted, burnt, fried; somewhat phenolic (FRM 2001); aromatic, roasted, burnt, fried; somewhat phenolic odor (PMP 2001) Also described as "sweet malty at 1 ppm in water" (Ivon Flament, Yvonne Bessière-Thomas, Coffee flavor chemistry, W iley & Sons, 2001, p. 142) The Good Scents Co. indicates -malty odor This material is an analog of the types of substituted cyclopentanediones f…	odorant					odor	burned	malty	caramellic	maple	odor							0	0	0	0	0	0	0	0	0	0	0	0
1	1	1	CCC1OC(=C(O)C1=O)C	achiral	ethylhydroxymethylfuranone	1	1256	1267	1504	2-Ethyl-4-hydroxy-5-methyl-3(2H)-furanone		Ethylhydroxymethylfuranone;2-Ethyl-4-hydroxy-5-methyl-3-furanone	2-Ethyl-4-hydroxy-5-methyl-3(2H)-furanone; 5-Ethyl-4-hydroxy-2-methyl-3(2H)-furanone; Homofuronol (GIV); Homofuraneol; Ethyl fraison	Sweet, sugary, caramel, bread like; intensely sweet caramel flavor; fruity	C7 H10 O3	142.152	27538-09-6	Nature Identical	Coffee, Fermented Soy Sauce, Tobacco	Odor threshold in water: 43 ppb. Givaudan indicates: Organoleptic character -Sweet, Cane Sugar Description -This chemical gives the impression of sweetness. Recommended flavour usage -Strawberry, Red Fruit, Tropical Recommended use level -2 -10 ppm Mosciano, et. al. report that this material has a "sweet, caramellic, bready, maple, brown sugar with burnt undernotes" odor and a "burnt, caramellic,…	odorant					unspecified diff flavor	sweet	sugar	caramellic	bread								0	1	0	0	0	0	0	0	0	0	0	0
1	1	1	CCC1=CC=C(S1)C=O	achiral	5-Ethylthiophene-2-carbaldehyde	1	1289	1301	1543	Ethylthiophenecarbaldehyde		Ethylthiophenecarbaldehyde; 5-Ethylthiophene-2-carbaldehyde		Caramellic, nutty, somewhat reminiscent of bitter almond	C7 H8 O S	140.204	36880-33-8	Artificial	#N/A	Givaudan indicates -Almond; An almond like aromatic chemical Recommended application -cherry, nut and meat flavours Recommended use level -20 ppm Boelens indicates -mild aromatic, somewhat reminiscent of benzaldehyde (FRM 2001) The Good Scents Co. indicates -like benzaldehyde @ 0.1% dilution Used in caramel, fruit, nut & roasted flavors 2132 OH S CH3	odorant					unspecified odorant	caramellic	nutty	bitter almond									0	0	0	0	0	0	0	0	0	0	0	0
1	1	1	CCOC(=O)CC1(C)OCC(C)O1	achiral	Fraistone	1	1319	1331	1580	Fraistone		Fraistone; Ethyl acetoacetate propylene glycol ketal	Ethyl 2,4-dimethyl-1,3-dioxolane-2-acetate; Methyl Fragolan; ethyl acetoacetate propyleneglycol acetal	Fresh, sweet-fruity notes reminiscent of apple and strawberry	C9 H16 O4	188.221	6290-17-1	Artificial	#N/A	Allured's Perfumer's Compendium (1996) decribes the material as A tart, fresh, fruity note reminiscent of apple and strawberry. IFF indicates: Odor Profile -Fruity, Apple Fruity, Strawberry Olfactory Description -A tart, fresh, anisic, fruity note reminiscent of apple, plum and strawberry. Moellhausen indicates -freshly fruity, reminiscent of apples and strawberries H&R (Symrise) describes the od…	odorant					unspecified odorant	fresh	sweet	fruity	apple	strawberry							1	1	0	0	0	0	0	0	0	0	0	0
1	1	1	CCCC(=O)OC1=C(C)OC(C)C1=O	achiral	furaneol-butyrate	1	1321	1333	1583	Furaneyl butyrate		Furaneyl butyrate; Furaneol butyrate	4-Butylyloxy-2,5-dimethyl-3(2H)-furanone; Butyric acid ester of 2,5-Dimethyl-4-hydroxy-3(2H)-furanone; 4-Butyroxy-2,5-dimethyl-3(2H)-furanone; Fraision Butyrate	Caramel, strawberry, less fruity and more buttery than Furaneol	C10 H14 O4	198.216	114099-96-6	Nature identical	Extract of lyophilized strawberries	U.S. Patent No. 4,889,735 December 26, 1989 to Firmenich indicates that this materials organoleptic properties are: Caramel, strawberry, less fruity and more buttery than Furaneol. Though the flavor properties of 2,5-dimethyl-4-oxo-3(5H)-furyl butanoate are reminiscent of those of Furaneol, namely with respect to its caramel note, they differ from it with regard to its intensity, its enhanced but…	odorant					unspecified odorant	caramellic	strawberry	buttery									0	0	0	0	0	0	0	0	0	0	0	0
1	1	1	O=CC1=CC=CO1	achiral	Furfural	1	1326	1338	1589	Furfural		Furfural;	2-Furylcarboxaldehyde; Fural; 2-Furancarbonal; 2-Formylfuran; alpha-Furfuraldehyde; 2-Furaldehyde; Pyromucic aldehyde; Furfuraldehyde;	Sweet, cereal, bread-like, yeasty, caramellic, spicy almond notes	C5 H4 O2	96.084	98-01-1	Nature Identical	Avocado, Burley Tobacco, Grape Brandy, Licorice, Potato, Raspberry, Roasted Almond, Roasted Barley, Roasted Peanut, Roasted Pecan, Strawberry, Wheat Bread.	Odor threshold in water: 3000-23,000 ppb. Flavor threshold in water: 5000 ppb. Mosciano, et. al. (1993), have described the organoleptic properties of a "natural" sample as follows: Odor as "Sweet, brown, woody, bready, caramellic, with a slight phenolic nuance" and taste as " Brown, sweet, woody, bready, nutty, caramellic with a burnt astringent nuance" at 30 ppm. (Perfumer & Flavorist, Vol. 18,…	odorant					unspecified odorant	sweet	cereal	bread	yeasty	caramellic	spicy	almond					0	1	0	0	0	0	0	0	0	0	0	0
1	1	1	SCC1=CC=CO1	achiral	Furfuryl-mercaptan	1	1333	1345	1600	Furfuryl mercaptan		Furfuryl mercaptan;	2-Furylmethane thiol; 2-Furanmethanethiol; alpha-Furfuryl mercaptan;	Powerful; burnt, coffee-like, somewhat caramellic & alliaceous on dilution	C5 H6 O S	114.167	98-02-2	Nature Identical	Coffee, Cooked Beef.	Odor threshold in water: 0.005 ppb. Flavor threshold in water: 0.04 ppb. Mosciano et al. indicate -"Odor: @ 0.01%. Intense sulfurous onion impact, lacrimator, slightly skunk like with a diary nuance and a hint of savory and coffee like notes. Taste: @ 0.2-1 ppb. Sulfurous, roasted, onion, garlic and coffee. Possible applications: Coffee, savory roasted meats, cooked poultry, seafood, chocolate an…	odorant					unspecified odorant	strong	burned	coffee	caramellic	alliaceous							0	0	0	0	0	0	0	1	0	0	0	0
1	1	1	CCCCC(=O)OCC1=CC=CO1	achiral	alpha-Furfuryl-pentanoate	1	1337	1349	1607	alpha-Furfuryl pentanoate		Furfuryl pentanoate; alpha-Furfuryl pentanoate;	Furfuryl pentanoate; 2-Furfuryl pentanoate; alpha-Furfuryl valerate; Pentanoic acid, furfuryl ester;	Fruity-pineapple-apple, caramellic odor; ripe pineapple-apple fruity taste	C10 H14 O3	182.216	36701-01-6	Nature Identical	Cooked Pork, Milk.	Fischetti (1980) indicates the odor is "woody, fruity, pineapple". Mosciano, et. al. report that this material has a "sweet, overripe fruity, pineapple and apple with caramellic nuances" odor and a "fruity, pineapple and apple with sweet fermented and caramellic nuances" taste at 15 ppm. (Perfumer & Flavorist, Vol. 16, March-April, (1991) Mosciano et al. indicate -"Odor: @ 1.0%. Sweet caramellic,…	odorant + taste					odor diff taste	fruity	pineapple	apple	caramellic	odor							1	0	0	0	0	0	0	0	0	0	0	0
1	1	1	CC\\C(C=O)=C/C1=CC=CO1	achiral	2-Furfurylidene-butyraldehyde	1	1342	1354	1612	Furfurylidenebutyraldehyde		Furfurylidenebutyraldehyde; 2-Furfurylidene butyraldehyde;	3-(2-Furyl)-2-ethylacrolein; 3-(2-Furyl)-2-ethyl-2-propenal; 2-Ethyl-3-(2-furyl)-2-propenal; 2-Ethyl-3-(2-furyl)-acrolein;	Caramellic, spicy, coconut-vanilla with nut & leathery nuances	C9 H10 O2	150.174	770-27-4	Artificial	Not considered Nature Identical by IOFI	Mosciano reports this as: "Odor: @ 1.0 percent. Sweet solvent like, brown, caramel with coconut, chocolate and vanilla nuances. Taste: @ 5 PPM. Sweet brown, coconut, creamy with an astringent nut skin and a vanilla aftertaste. Possible applications -Caramel, brown sugar, molasses, nut, coconut & vanilla." (Perfumer & Flavorist, Vol. 31, No. 4, p. 37, 2006) JECFA indicates -Mild, warm, vegetable-l…	odorant					unspecified odorant	caramellic	spicy	coconut	vanilla	nutty	leather						0	0	0	0	0	0	0	0	0	0	0	0
1	1	1	CC(=O)CCC1=CC=CO1	achiral	Furylbutanone	1	1349	1361	1621	Furylbutanone		Furylbutanone; 1-(2-Furyl)butan-3-one;	4-(2- Furyl)butan-2-one; 4-furyl-2-butanone; Furfuryl acetone	Spicy furanic-caramellic, somewhat spicy, fruity, flavor	C8 H10 O2	138.164	699-17-2	Nature Identical	Beef (grilled, roasted), Coffee	United States Patent 3,952,024 by Winter, et al. April 20, 1976 assigned to Firmenich describes the flavor as: weak furanic note at 50 ppm in sugar surup and fruity, banana oil flavor note at 6.3 ppm in a soluble coffee base. JECFA indicates -Spicy caramel aroma. The Good Scents Co. indicates -spicy caramel odor This material appeared in the addendum to the 3d Edition of the Council of Europe Lis…	odorant					unspecified diff flavor	spicy	furanic	caramellic									0	0	0	0	0	0	0	0	0	0	0	0
1	1	1	CC(=O)C1=CC=CO1	achiral	Furylmethylketone	1	1351	1363	1623	Furylmethylketone		Furylmethylketone; 2-Furyl methyl ketone; 2-Acetylfuran;	Acetylfuran; Methyl 2-furan ketone; 2-Furan methyl ketone;	Sweet, caramellic, balsamic, cereal, slight nut notes	C6 H6 O2	110.111	1192-62-7	Nature Identical	Burley Tobacco, Chestnut, Cocoa, Coffee, Cooked Beef, Cooked Pork, Popcorn, Raisin, Roasted Almond, Roasted Peanut, Tamarind, Tea, Wheat Bread, Yogurt.	Odor threshold in water: 10000 ppb. Odor threshold in beer: 80,000 ppb. Flavor threshold in water: 80,000 ppb. Oxford (now Frutarom) indicates: Odour Description -Balsamic, Caramel, Sweet Suggested Uses -Bakery, Chocolate, Cocoa, Coffee, Nut, Tomato Boelens indicates -sweet aromatic, ethereal, musty, caramellic, somewhat bitter almond-like (FRM 2001) The Good Scents Co. indicates -sweet balsam al…	odorant					unspecified odorant	sweet	caramellic	balsamic	cereal	weak	nutty						0	1	0	0	1	0	0	0	0	0	0	0
1	1	1	CC(=O)CC1=CC=CO1	achiral	Furylpropanone	1	1352	1364	1625	Furylpropanone		Furylpropanone; (2-Furyl)-2-propanone;	Furfuryl methyl ketone; Methyl furfuryl ketone; Furyl acetone;	Sweet, fruity, caramellic, spicy aroma; fruity spicy, slight nutty taste	C7 H8 O2	124.137	6975-60-6	Nature Identical	Coffee, Cooked Beef, Cooked Pork, Licorice, Potato, Wheat Bread.	United States Patent 3,952,024 by Winter, et al. April 20, 1976 assigned to Firmenich describes the flavor as: green, burnt taste at 20 ppm in sugar syrup; astringent note at 20 ppm in one soluble coffee base and peach pit, almond taste at 34.6 ppm in a 2d coffee base. Boelens indicates -aromatic, fruity, burnt & roasted (FRM 2001). Arctander indicates -"Mild, sweet, fruity-caramellic, somewhat s…	odorant + taste					aroma diff taste	sweet	fruity	caramellic	spicy	aroma							1	1	0	0	0	0	0	0	0	0	0	0
1	1	1	CCCCCC(=O)OC\\C=C(/C)CCC=C(C)C	achiral	Geranyl-hexanoate	1	1366	1378	1641	Geranyl hexanoate		Geranyl hexanoate; Geranyl caproate;	trans-3,7-Dimethyl-2,6-octadien-1-yl hexanoate;	Fruity, rose-pineapple-tropical odor; sweet tropical fruity taste	C16 H28 O2	252.392	10032-02-7	Nature Identical	Kumquat, Passion Fruit, Andrenid bees.	Judith Michalski (Perfumer & Flavorist, May 2010, p. 46-47) indicates: Odor @ 100%. Floral, waxy green and dry leaf-like. Taste: @ 0.5 ppm. Green, fruity and slightly floral. Taste: @ 3 ppm. slightly floral, green, fruity and pulp like. Possible applications: Another non-characterizing ester, geranyl caproate adds interesting effects, particularly fruity notes, in peach, apple, plum and apricot f…	odorant + taste					odor diff taste	fruity	rose	pineapple	tropical fruit	odor							1	0	0	0	0	0	0	0	0	0	0	0
1	1	1	CCCCC(=O)OC\\C=C(/C)CCC=C(C)C	achiral	Geranyl-valerate	1	1376	1388	1652	Geranyl valerate		Geranyl valerate; Geranyl pentanoate	2,trans-3,7-dimethyl-2,6-Octadien-1-yl pentanoate; (2E)-3,7-dimethyl-2,6-Octadien-1-yl pentanoate	Fruity, with pineapple, apple-peel, rose-tobacco notes	C15 H26 O2	238.36	10402-47-8	Nature identical	Geranium oil	Boelens indicates -mild herbal, slightly floral fruity; somewhat buttery odor/flavor (PMP 2001 & FRM 2001) The Good Scents Co. indicates -rose fruity pineapple JECFA indicates -Fruity pineapple aroma Horst Surburg, Johannes Panten indicate -a strong fruity rose odor (Common fragrance and flavor materials, 5th.Ed., Wiley-VCF, 2006, p. 46) Burdock indicates -a rose odor with an apple-pineapple unde…	odorant					unspecified odorant	fruity	pineapple	apple peel	rose	tobacco							1	0	0	0	0	0	0	0	0	0	0	0
1	1	1	CCCC\\C=C\\C(O)=O	achiral	trans-2-Heptenoic-acid	1	1425	1437	1732	trans-2-Heptenoic acid		Heptenoic acid; trans-2-Heptenoic acid		Green grassy fruity, rancid-fatty-cheese, somewhat sour caramellic	C7 H12 O2	128.169	10352-88-2	Nature Identical	Pork fat, White wine	Boelens indicates: caprylic, fatty flavor (FRM 2001) The Good Scents Co. indicates -rancid odor JECFA indicates -Disagreeable rancid aroma Used in dairy (cheese, cream, butter), fat, caramel and fruit flavors. Summary of Evaluations Performed by the Joint FAO/WHO Expert Committee on Food Additives (E)-2-HEPTENOIC ACID FEMA No.: 3920 JECFA No.: 1373 Chemical names: trans-2-HEPTENOIC ACID Functiona…	odorant					unspecified odorant	green	grassy	fruity	rancid cheese	fatty cheese	sour	caramellic					1	0	1	0	0	0	0	0	0	0	0	0
1	1	1	CCCC/C=C/COC(C)=O	achiral	trans-2-heptenyl-acetate	1	1434	1446	1742	trans-2-Heptenyl acetate		Heptenyl acetate (trans isomer); trans-2-Heptenyl acetate;	(E)-2-Heptenyl acetate	Sweet, waxy tropical note reminiscent of kiwi and pineapple	C9 H16 O2	156.222	16939-73-4	Nature Identical	Banana (isomer not specified), Yellow passionfruit	*May be covered under the EC Register FLAVIS No. 09.385 Bedoukian has previously indicated: Odor Description: A sweet, waxy tropical note reminiscent of kiwi and pineapple. Fragrance Use: For berry notes in fruity complexes. Flavor Use: Can be used as an exotic twist to kiwi, pineapple, apple, peach, berry flavors. JECFA indicates -Fresh leaf aroma Normal use level is 5-50 ppm Present in Yellow p…	odorant					unspecified odorant	sweet	waxy	tropical fruit	kiwi	pineapple							0	1	0	0	0	0	0	0	1	0	0	0
1	1	1	C\\C=C\\C=C\\COC(C)=O	achiral	Hexa-2-4-dienyl-acetate	1	1476	1488	1791	Hexadienyl acetate		Hexadienyl acetate; 2,4-Hexadienyl acetate; Sorbyl acetate	2,4-Hexadienyl acetate Hexa-2,4-dienyl acetate	Sweet fruity, apple, pineapple, pear, wine-like odor	C8 H12 O2	140.18	1516-17-2	Artificial	Not considered Nature Identical by IOFI	Bedoukian indicates: Odor Description: A powerful, sweet, pineapple odor. Flavor Use: The spicy warm quality of this material can add depth to any fruit flavor, particularly pineapple and tropical flavors. Mosciano, et al. indicate -"Odor: @ 1.0%. Green fruity, lea+ green Granny Smith apple and pearlike with slight floral, creamy, fatty and aldehydic nuances. Taste: @ from 5-10 PPM. Fruity pearli…	odorant					odor	sweet	fruity	apple	pineapple	pear	winey	odor					1	1	0	0	0	0	0	0	0	0	0	0
1	1	1	C/C=C/C=C/COC(=O)C(C)C	achiral	hexadienyl-isobutyrate	1	1478	1490	1793	Hexadienyl isobutyrate		Hexadienyl isobutyrate; 2,4-Hexadienyl isobutyrate	Sorbyl isobutyrate; 2,4-Hexadienyl isobutanoate; 2,4-Hexadienyl 2-methylpropanoate	Sweet fruity, tropical, pineapple odor; Green, fruity, apple taste	C10 H16 O2	168.233	16491-24-0	Artificial	Not considered Nature Identical by IOFI	Judith Michalski (Perfumer & Flavorist, March 2010, p. 50-51) indicates: Odor: @ 1%. Sweet, fruity (apple, melon, tropical), slightly floral and green notes. Taste: @ 2 ppm. Fruity, apple, sweet, low tropical notes. Taste: @ 4 ppm. Green, fruity, apple, fresh, waxy. Possible applications: Although it's not a characterizing note on its own, this compound could be helpful in fruits such as apple, m…	odorant + taste					odor diff taste	sweet	fruity	tropical fruit	pineapple	odor							1	1	0	0	0	0	0	0	0	0	0	0
1	1	1	CCC(=O)OC\\C=C\\C=C\\C	achiral	hexadienyl-propionate	1	1479	1491	1794	Hexadienyl propionate		Hexadienyl propionate; 2,4-Hexadienyl propionate	Sorbyl propionate; 2,4-hexadienyl propanoate; (2E,4E)-hexa-2,4-dienyl propionate	Sweet, fruity, pineapple, wine-like odor	C9 H14 O2	154.206	16491-25-1	Artificial	Not considered Nature Identical by IOFI	Judith Michalski (Perfumer & Flavorist, March 2010, p. 50-51) indicates: Odor: @ 1%. Green, fruity, tropical with rancid dairy nuances. Taste: @ 2 ppm. Green, vegetable like, waxy with underlying musty tones. Taste: @ 4 ppm. Green, tropical fruit, waxy with slight cheesy notes. Possible applications: At lower levels 2,4-hexadienyl propionate can reinforce fresh notes in vegetable flavors, pear an…	odorant					odor	sweet	fruity	pineapple	winey	odor							1	1	0	0	0	0	0	0	0	0	0	0
1	1	1	CCC1OC(=O)C=C1	achiral	5-Ethyl-2-furanone	1	1536	1549	1858	Hexenolactone		Hexenolactone; Hex-2-eno-1,4-lactone; 5-Ethyl-2(5H)-furanone		Coconut, coumarinic, caramellic, slight fruity, spicy	C6 H8 O2	112.127	2407-43-4	Nature Identical	Guava, Raisin, Raspberry, Asparagus (raw & cooked), Tomato, W heat bread, Rye bread, Fermented tea, Shimp (cooked), Chicken fat	Previously assigned Flavis No. 10.046 *Note -COMMISSION DECISION of 26 February 2009 amending Decision 1999/217/EC as regards the EC register of flavouring substances: Deleted from list. Boelens indicates -sweet aromatic, slightly fruity, somewhat reminiscent of tonka beans odor/flavor (PMP 2001 & FRM 2001) Easily formed by oxidation of (Z)-3-hexenal (Ron G. Buttery, and Gary R. Takeoka, Some Unu…	odorant					unspecified odorant	coconut	coumarinic	caramellic	weak	fruity	spicy						1	0	0	0	1	0	0	0	0	0	0	0
1	1	1	CCCC(=O)OCCCCC=C	achiral	5-hexenyl-butyrate	1	1555	1568	1880	5-Hexenyl butyrate		Hexenyl butyrate; 5-Hexenyl butyrate		Green, fruity, pineapple; useful in Quince	C10 H18 O2	170.249	108058-75-9	Nature Identical	Chinese quince peel	Mihara, et. al., Volatile Components of Chinese Quince (Pseudocydonia sinensis Schneid), J. Agric. Food Chem. 1987, 35, 532-537 indicate that 5-hexenyl esters are important contributors to the flavor of Chinese Quince. The odor of 5-hexenyl butyrate is described as fruity, pineapple-like. 2613 O O CH3 CH3	odorant + role					odor diff flavor role	green	fruity	pineapple									1	0	1	0	0	0	0	0	0	0	0	0
1	1	1	CC/C=C/CCOC(=O)C1=CC=CO1	achiral	hexenyl-furoate	1	1566	1579	1893	Hexenyl furoate		Hexenyl furoate; cis-3-Hexenyl 2-furoate	(Z)-3-Hexenyl 2-furoate	Green, sweet, tropical fruit, faintly caramellic	C11 H14 O3	194.227		Artificial	#N/A	2629 O CIS OR TRANS CH3 O	odorant					unspecified odorant	green	sweet	tropical fruit	weak	caramellic							0	1	1	0	1	0	0	0	0	0	0	0
1	1	1	CCC\\C=C\\C(=O)OCC\\C=C/CC	achiral	cis-3-Hexenyl-trans-2-hexenoate	1	1575	1588	1904	cis-3-Hexenyl trans-2-hexenoate		Hexenyl hexenoate; cis-3-Hexenyl trans-2-hexenoate	(Z)-3-Hexenyl (E)-2-hexenoate	Green, fruity with pear-melon, apple, pineapple & tropical notes	C12 H20 O2	196.286	53398-87-1	Nature identical	Black, Green & partially fermented teas, Mango	Mosciano, et al. indicate -"Odor: @ 1.0%. Intense green, fresh estry, fruity apple and pear like with ripe pineapple, kiwi, mango and banana nuances. Taste: @ 1 PPM. Fresh green, fruity applelike with ripe pineapple and citrus nuances. Possible applications: Apple, pear, strawberry, kiwi, pineapple, mango and banana." (Perfumer & Flavorist, Vol. 33, August 2008, p. 66-67) Boelens indicates -green…	odorant					unspecified odorant	green	fruity	pear	melon	apple	pineapple	tropical fruit					1	0	1	0	0	0	0	0	0	0	0	0
1	1	1	CC(C)C(=O)OCCCCC=C	achiral	5-hexenyl-isobutyrate	1	1576	1589	1906	5-Hexenyl isobutyrate		Hexenyl isobutyrate; 5-Hexenyl isobutyrate		Fresh, green fruity, pineapple; useful in Quince	C10 H18 O2	170.249	155514-56-0	Artificial	#N/A	Mihara, et. al., Volatile Components of Chinese Quince (Pseudocydonia sinensis Schneid), J. Agric. Food Chem. 1987, 35, 532-537 indicate that 5-hexenyl esters are important contributors to the flavor of Chinese Quince. The odor of the related 5-hexenyl butyrate is described as fruity, pineapple-like. 2645 O CH3 O CH3 H3C	odorant + role					unspecified diff flavor role	fresh	green fruity	pineapple									0	0	0	0	0	0	0	0	0	0	0	0
1	1	1	CC\\C=C/CCOC(=O)CCC(C)=O	achiral	hexenyl-levulinate	1	1584	1597	1915	Hexenyl levulinate		Hexenyl levulinate; cis-3-Hexenyl levulinate	(Z)-3-Hexenyl levulinate; (Z)-3-Hexenyl 4-oxopentanoate; (3Z)-hex-3-enyl 4-oxopentanoate	Green, caramellic; somewhat fruity, green apple-like, earthy	C11 H18 O3	198.259	85554-70-7	Artificial	#N/A	Boelens indicates: green, caramellic; somewhat fruity, green apple-like, earthy (FRM 2001). Used in in fruity & caramellic flavourings. 2658 O CIS OR TRANS O O CH3 H3C	odorant					unspecified odorant	green	caramellic	fruity	green apple	earthy							1	0	1	0	0	0	0	0	0	0	0	0
1	1	1	CC\\C=C/CCOC(=O)C(C)CC	achiral	cis-3-Hexenyl-2-methylbutanoate	1	1586	1599	1919	cis-3-Hexenyl 2-methylbutanoate		Hexenyl methylbutanoate; cis-3-Hexenyl 2-methylbutanoate;	(Z)-3-Hexenyl 2-methylbutanoate;	Fruity green apple-pear-pineapple odor; green apple-pear taste	C11 H20 O2	184.275	53398-85-9	Nature identical	Scotch Spearmint oil, Black & Green teas, Plum, Apricot	Firmenich indicates for a natural sample: Fresh, green and unripe fruit notes. cis-3-HEXENYL 2-METHYLBUTANOATE has a nice apple, pear and berry-like profile, with a waxy skin nuance which is excellent for tea, apple, green apple, citrus and herbal flavors. Recommended dosage in final application 20 – 50 ppm Boelens indicates for the cis isomer -green, fruity; green apple-& banana-like odor (PMP 2…	odorant + taste					odor diff taste	fruity	green apple	pear	pineapple	odor							1	0	0	0	0	0	0	0	0	0	0	0
1	1	1	CC\\C=C/CCOC(=O)C(C)=O	achiral	cis-3-Hexenyl-2-oxopropionate	1	1599	1612	1937	Hexenyl pyruvate		Hexenyl pyruvate; cis-3-Hexenyl 2-oxopropionate	(Z)-3-Hexenyl pyruvate	Green, spicy, caramelic odor; green cucumber-melon vegetative taste	C9 H14 O3	170.206	68133-76-6	Nature identical	Celery leaves	Bedoukian indicates: Odor Description: Green, spicy, caramellic odor. Fragrance Use: Adds a warm, spicy note to heavier fragrances. Flavor Use: Used mostly in imitation celery flavor, but can also be used in caramel, raisin, prune flavors. Mosciano, et. al. (2000) describes the Odor @ 1% as "Green, oily and fatty with a cucumber vegetative and fruity melon rind like nuance and a slight hint of a …	odorant + taste					odor diff taste	green	spicy	caramellic	odor								0	0	1	0	0	0	0	0	0	0	0	0
1	1	1	CCCCC(=O)OC\\C=C\\CCC	achiral	trans-2-Hexenyl-valerate	1	1603	1616	1941	(E)-2-Hexenyl valerate		Hexenyl valerate; (E)-2-Hexenyl valerate;	trans-2-Hexenyl valerate; trans-2-Hexenyl pentanoate	Freen fruity apple, pear, pineapple, winey-cognac, waxy	C11 H20 O2	184.275	56922-74-8	Artificial	Not considered Nature Identical by IOFI	Mosciano, et. al. (2000) describes the Odor @ 1% as "Green, estry, fruity, apple, green banana and pineapple with slight cognac and winey nuances" and the Taste @ 1-10 PPM as "Waxy green fruity apple, pear and pineapple with a slight waxy floral aftertaste." (Perfumer & Flavorist, Vol. 25, September/October 2000, p. 74) Boelens indicates -green-fruity; ripe apple/pear, winey aroma (PMP 2001); rip…	odorant					unspecified odorant	fresh	fruity	apple	pear	pineapple	winey	cognac	waxy				1	0	0	0	0	0	0	0	1	0	0	0
1	1	1	CCCCCCOC(=O)\\C=C\\C	achiral	n-Hexyl-2-butenoate	1	1609	1623	1948	Hexyl 2-crotonate	Hexyl 2-butenoate	Hexyl butenoate; Hexyl 2-butenoate	Hexyl crotonate	Fruity, woody odor; fruity,apple, pear, pineapple-like	C10 H18 O2	170.249	19089-92-0	Artificial	#N/A	Mosciano (2001) indicates for the trans isomer: Odor: @ 10% -Sweet, fruity green with apple and pear characters. It has vegetative nuances of celery and radish. A slight tropical note of pineapple. Taste: @ 10-25 ppm -Green, sweet pear with vegetative nuances of radish, potato and mushroom. Potential Applications: Pear, apple, pineapple, melon, green strawberry and vegetative nuances for mushroom…	odorant					odor	fruity	woody	odor	apple	pear	pineapple						1	0	0	0	0	0	0	0	0	1	0	0
1	1	1	CCCCCCOC(=O)CCC(C)=O	achiral	hexyl-levulinate	1	1624	1638	1964	Hexyl levulinate		Hexyl levulinate	Hexyl 4-oxopentanoate	Warm winey-caramellic, slightly fruity	C11 H20 O3	200.275	24431-34-3	Artificial	#N/A	Used in in fruity & caramellic flavourings. 2726 CH3 SH O OCH3	odorant					unspecified odorant	warm	winey	caramellic	weak	fruity							1	0	0	0	1	0	0	0	0	0	0	0
1	1	1	O=C1CCCO1	achiral	4-Hydroxybutanoic-acid-lactone	1	1669	1685	2020	Hydroxybutanoic acid lactone		Hydroxybutanoic acid lactone; gamma-Butyrolactone	4-Hydroxybutanoic acid lactone; 4-Butanolide; Butan-4-olide; 1,4-Butanolide; Butanolide-1,4;	Weak, slightly caramellic, nutty, buttery odor	C4 H6 O2	86.089	96-48-0	Nature Identical	Apricot, Cocoa, Coffee, Honey, Mango, Passion Fruit, Pineapple, Roasted Peanut, Strawberry W ine, Tea, Wheat Bread.	Mosciano, et. al. report that this material has a "creamy, oily with fatty nuances" odor and a "milky, creamy with fruity peach-like afternotes" taste at 75 ppm. (Perfumer & Flavorist, Vol. 16, March/April 1991, p. 48) Interchim describes the odor/flavor properties as Sweet caramel. Boelens indicates -fresh, somewhat fruity, lactonic, cheesy & buttery note odor (PMP 2001); milky, creamy with frui…	odorant					odor	weak	caramellic	nutty	buttery	odor							0	0	0	0	1	0	0	0	0	0	0	0
1	1	1	CCC(=O)CO	achiral	1-Hydroxy-2-butanone	1	1670	1686	2021	1-Hydroxy-2-butanone		Hydroxybutanone; 1-Hydroxy-2-butanone;	m-Butanol-2-one; 2-Oxobutan-1-ol; Propionyl carbinol;	Brown, caramellic, oily and alcoholic with toasted grain notes	C4 H8 O2	88.105	5077-67-8	Nature Identical	Coffee, Honey, Licorice, Mushroom.	A Firmenich patent (U.S. No. 3,931,246 January 6, 1976) describes the flavor as: burnt, caramel, slightly buttery taste at 30 ppm in sugar syrup. Boelens indicates -fresh ethereal, burnt sugar, slightly fruity (PMP 2001) Mosciano, et. al. (1997) describe the odor as "Sweet, brown, coffee, musty, grain-and pyrazine-like with malt and butterscotch nuances" and the taste (at 30 ppm) as "Brown, oily …	odorant					unspecified odorant	brown	caramellic	oily	alcoholic	toasted grain							0	0	0	0	0	0	0	0	0	0	0	0
1	1	1	CC(=O)CCO	achiral	4-Hydroxybutan-2-one	1	1671	1687	2022	4-Hydroxybutan-2-one		Hydroxybutanone; 4-Hydroxybutan-2-one		Weak, sweet, milky somewhat caramellic	C4 H8 O2	88.105	590-90-9	Nature Identical	Licorice	Possible uses are in dairy, caramel flavors. This material appeared in the addendum to the 3d Edition of the Council of Europe List (1981) with a "10000" series number for Flavoring substances not fully evaluated (assigned numbers 10,001 upwards). Accordingly, we have included this number in the COE field but it should not be considered as approved for use by the COE as it does not appear in late…	odorant					unspecified odorant	weak	sweet	milky	caramellic								0	1	0	0	1	0	0	0	0	0	0	0
1	1	1	O=C1CCCCC1=O	achiral	1-2-cyclohexanedione	1	1681	1697	2036	Hydroxycyclohexenone		Hydroxycyclohexenone; 2-Hydroxy-2-cyclohexen-1-one;	1,2-Cyclohexanedione;	Caramellic, intense foenugreek character; somewhat burnt, harsh chemical	C6 H8 O2	112.127	10316-66-2	Artificial*	This material is considered by IOFI to be Nature Identical in natural products not normally considered as foods.	This material is the subject of United States Patent 3875307 entitled "Flavoring foodstuffs with a mixture containing 1,2 cyclohexanedione" (April 1, 1975) by John Woltet et al. assigned to IFF. -It has now been discovered that novel solid and liquid foodstuff and flavoring compositions having sweet burnt notes reminiscent of licorice and cyclotene and which can be described as sweet caramel, and…	odorant					unspecified odorant	caramellic	strong	fenugreek	burned	harsh	chemical						0	0	0	0	0	0	0	1	0	0	0	0
1	1	1	CC(C)[C@H]1CC[C@H](C)CC(=O)O1	chiral	Menthone-lactone	1	1684	1700	2039	Hydroxydimethyloctanoic acid lactone		Hydroxydimethyloctanoic acid lactone; Menthone lactone;	6-Hydroxy-3,7-dimethyloctanoic acid lactone; 4-Methyl-7-isopropyl-2-oxepanone; 6-Isopropyl-3-methyl-hexan-6-olide;	Caramelic, brown sugar, maple notes	C10 H18 O2	170.249	499-54-7	Nature Identical	Mentha piperita rizomes	Boelens indicates -floral-herbal, spicy, rose absolute character, minty note odor (PMP 2001); lactonic, somewhat fruity, coconut aspects flavor (FRM 2001) The Good Scents Co. indicates -maple syrup brown sugar odor @ 1% dilution Shmuel Yannai idicates -maple syrup-brown sugar odour (Dictionary of Food Compounds with CD-ROM: Additives, Flavors, and Ingredients. CRC Press, 2003, p. 664) JECFA indic…	odorant					unspecified odorant	caramellic	brown sugar	maple									0	0	0	0	0	0	0	0	0	0	0	0
1	1	1	CCC(O)C(=O)CC	achiral	4-Hydroxy-3-hexanone	1	1687	1703	2044	Hydroxyhexanone		Hydroxyhexanone; 4-Hydroxyhexan-3-one; 4-Hydroxy-3-hexanone;	Propioin	Somewhat buttery, caramellic, dairy notes	C6 H12 O2	116.158	4984-85-4	Nature Identical	Black tea, Durian	Boelens indicates -fruity, somewhat burnt and caramellic (FRM 2001) Possible uses include dairy & caramel, chocolate flavors. This material appeared in the addendum to the 3d Edition of the Council of Europe List (1981) with a "10000" series number for Flavoring substances not fully evaluated (assigned numbers 10,001 upwards). Accordingly, we have included this number in the COE field but it shou…	odorant					unspecified odorant	buttery	caramellic	dairy									0	0	0	0	0	0	0	0	0	0	0	0
1	1	1	CC1=C(O)C(=O)CC(C)(C)C1	achiral	2-Hydroxy-3-5-5-trimethyl-2-cyclohexenone	1	1689	1705	2047	Hydroxyisophorone		Hydroxyisophorone; 2-Hydroxy-3,5,5-trimethyl-2-cyclohexenone;	2-Hydroxyisophorone; 3,5,5-Trimethyl-1,2-cyclohexanedione;	Sweet, musty tea, caramellic odor; musty, tea, nutty, tobacco taste	C9 H14 O2	154.206	4883-60-7	Nature Identical	Burley tobacco	Mosciano et al. indicate -"Odor: @ 1.0%. Brown caramellic, sweet, with a metallic nuance. Taste: @ 20 ppm. Sweet, brown, slightly nutty with a phenolic nuance. Possible applications: Brown sugar, caramel, coffee, chocolate, peanut, licorice, maple and honey." (Perfumer & Flavorist, Vol. 34, March 2009, p. 57-59) Frachem Technologies indicates -cool, tobacco-like odor Treatt indicates -phenolic/ca…	odorant + taste					odor diff taste	sweet	musty tea	caramellic	odor								0	1	0	0	0	0	0	0	0	0	0	0
1	1	1	CC1=CC(=C(C=O)C=C1)O	achiral	2-Hydroxy-4-methylbenzaldehyde	1	1695	1711	2055	Hydroxymethylbenzaldehyde		Hydroxymethylbenzaldehyde; 2-Hydroxy-4-methylbenzaldehyde;	4-Methylsalicylic aldehyde; 4-Methylsalicylaldehyde; 2,4-Cresotaldehyde;	Sweet notes of caramel, burnt, coumarinic aspects	C8 H8 O2	136.148	698-27-1	Nature Identical	Blackberry, capers, cranberry, raspberry, sea buckthorn	The Good Scents Co. indicates -bitter almond phenolic odor @ 1% dilution Boelens indicates -aromatic, slightly phenolic & bitter almond-like odor/flavor (PMP 2001 & FRM 2001) JECFA indicates -a strong, bitter-almond, phenolic odour Normal use levels 0.2-2.0 ppm A Firmenich patent (U.S. No. 4,512,352 April 23, 1985) indicates: This material represents a simple higher homolog of prior used salicyli…	odorant					unspecified odorant	sweet	caramellic	burned	coumarinic								0	1	0	0	0	0	0	0	0	0	0	0
1	1	1	CC1=C(O)C(=O)CO1	achiral	4-Hydroxy-5-methyl-3-furanone	1	1696	1712	2056	Hydroxymethylfuranone		Hydroxymethylfuranone; 4-Hydroxy-5-methyl-3(2H)-Furanone;	Norfuraneol; Chicory furanone; 5-Methyl-4-hydroxy-3(2H)-furanone; 4-Hydroxy-5-methyl-2,3-dihydrofuran-3-one;	Sweet, caramel, burnt sugar, roasted chicory, maltol-like	C5 H6 O3	114.099	19322-27-1	Nature Identical	Cooked Beef, Fermented Soy Sauce, Guava, Raspberry, Tomato	Probably useful in Coffee, Licorice, Meat, Poultry, Nut and Fruit flavors. Normal use levels in finished consumer product: up to 35 ppm. Givaudan indicates: Organoleptic character -Caramel, Sugar, Roast Description -This chemical is effective in meat flavours for the sweet effect of the roast note. Recommended flavour usage -Beef, Chicken, Toffee, Caramel, Sugar, Tobacco Recommended use level -0.…	odorant					unspecified odorant	sweet	caramellic	burnt sugar	roasted chicory	maltol	fruity	berry	strawberry	fruit preserves			1	1	0	0	0	0	0	0	0	0	0	0
1	1	1	CC(=O)C1=C(CO)C=CS1	achiral	hydroxymethylthienylethanone	1	1705	1722	2068	Hydroxymethylthienylethanone		Hydroxymethylthienylethanone;	1-(3-Hydroxy-5-methyl-2-thienyl)ethanone; 2-Acetyl-3-hydroxy-5-methylthiophene	Burnt brown, roasted meaty & caramel notes	C7 H8 O2 S	156.203	133860-42-1	Artificial	Not considered Nature Identical by IOFI	Note* -at the time of this writing, this material has been assigned an EC Flavis number, but not officially been placed on the EC Register List. The Flavis number is 15.127 JECFA indicates -Meaty, cooked brown or roasted aroma The Good Scents Co. indicates -meaty cooked roasted odor Possible uses include caramel, fruit and roasted flavors. This is the thiophene analog of isomaltol. Summary of Eva…	odorant					unspecified odorant	burned	brown	roasted meat	caramellic								0	0	0	0	0	0	0	0	0	0	0	0
1	1	1	CCC(O)C(C)=O	achiral	3-Hydroxy-2-pentanone	1	1709	1726	2072	3-Hydroxy-2-pentanone		Hydroxypentanone; 3-Hydroxy-2-pentanone;	Acetyl ethyl carbinol; 3-Hydroxypentan-2-one; 1-acetyl-1-propanol	Buttery-creamy caramel notes	C5 H10 O2	102.132	3142-66-3	Nature Identical	Beer, Butter, Coffee, Cooked Pork, Honey, Yogurt, Tea, Cheese, Durian, W ine, .	Frauke Neuser, Holger Zorn, and Ralf G. Berger (Generation of Odorous Acyloins by Yeast Pyruvate Decarboxylases and Their Occurrence in Sherry and Soy Sauce, J. Agric. Food Chem. 2000, 48, 6191-6195) describe this material as "caramel-sweet, buttery" by sniff GC and estimate the odor threshold as 500-600 ng. Also described as "a buttery, creamy flavor" (Coffee Flavor Chemistry by Ivon Flament, Yv…	odorant					unspecified odorant	buttery	creamy	caramellic									0	0	0	0	0	0	0	0	0	0	0	0
1	1	1	CC(=O)CCC1=CC(=CC=C1)O	achiral	3-Hydroxy-4-phenyl-2-butanone	1	1711	1728	2075	Hydroxyphenylbutanone		Hydroxyphenylbutanone; 3-Hydroxy-4-phenyl-2-butanone	3-Hydroxy-4-phenylbutan-2-one	Floral, creamy, caramel sweet aroma	C10 H12 O2	164.201	5355-63-5	Nature Identical	Mimusops elengi flower headspace, Dendrobium beckleri flower headspace, Sherry wine, Soy sauce, Wisteria flowers, Honey	The Odor Qualities and Threshold Values (in absolute ng of each odor impression, determined by Sniff-GC) for 3-hydroxy-4-phenyl-2-butanone were described as floral-sweet and a threshold of 75-100 ng determined by Frauke Neuser, Holger Zorn, and Ralf G. Berger, Generation of Odorous Acyloins by Yeast Pyruvate Decarboxylases and Their Occurrence in Sherry and Soy Sauce, J. Agric. Food Chem. 2000, 4…	odorant					aroma	floral	creamy	caramellic	sweet	aroma							0	1	0	1	0	0	0	0	0	0	0	0
1	1	1	CC(C)CCOC(=O)CCC1=CC=CO1	achiral	Isoamyl-3-furanpropionate	1	1741	1758	2108	Isoamyl furanpropionate		Isoamyl furanpropionate; Isoamyl 3-(2-furan)-propionate;	3-Methylbutyl 3-(2-furyl)-propionate; Isoamyl 2-furanpropionate "so called"; Isopentyl 2-furanpropionate "so-called";	Sweet, green-floral-fruity. fermented with caramel notes	C12 H18 O3	210.27	7779-67-1	Artificial	Not considered Nature Identical by IOFI	Aldrich indicates -caramel; green; floral odor The Good Scents Co. indicates -sweet green floral fruity sour apple rose raisin caramel odor Burdock indicates -sweet green, slightly floral odor with a distinct fruital note (Fenaroli’s Handbook of Flavor Ingredients, Fifth Edition. CRC Press, 2004, p. 904) Arctander indicates -Sweet-green, somewhat floral odor with fruity notes, sweet-caramellic un…	odorant					unspecified odorant	sweet	green	floral	fruity	fermented	caramellic						1	1	1	1	0	0	0	0	0	0	0	0
1	1	1	CCCCCC(=O)OCCC(C)C	achiral	Isoamyl-hexanoate	1	1744	1761	2111	Isoamyl hexanoate		Isoamyl hexanoate; Isoamyl caproate; Isopentyl hexanoate;	3-Methylbutyl caproate; Isopentyl caproate; 3-Methylbutyl hexanoate; Hexanoic acid, isoamyl ester;	Fruity, apple-banana-pineapple, somewhat waxy aroma & taste	C11 H22 O2	186.291	2198-61-0	Nature Identical	Apple, Beer, Grape, Grape Brandy, Passion Fruit, Rum, Whiskey, Wine.	Seoul Perfumery Co., Ltd. indicates -Fruity, apple, pineapple, banana, fruity green, sweet odor. Oxford (now Frutarom) indicates: Odour Description -Banana, Fruity, Green, W axy Suggested Uses -Apple, Citrus Fruits, Peach, Plum, Soft Fruits Mosciano, et. al. report that this material has a "fruity, sweet, pineapple with a slightly pungent sour cheesey note" odor and a "fruity, green, pineapple wi…	odorant + taste					aroma idem taste	fruity	apple	banana	pineapple	waxy	aroma	taste					1	0	0	0	0	0	0	0	1	0	0	0
1	1	1	CC(C)CCOC(=O)CC(C)C	achiral	Isoamyl-isovalerate	1	1747	1764	2114	Isoamyl isovalerate		Isoamyl isovalerate; Isoamyl 3-methylbutanoate;	Isoamyl isovalerianate; Isopentyl isovalerate; 3-Methylbutyl 3-methylbutyrate; Isopentyl 3-Methylbutanoate;	Fruity odor of green-apple, pineapple, tropical, mango, apricot. cognac	C10 H20 O2	172.265	659-70-1	Nature Identical	Banana, Beer, Grape Brandy, Plum, Rum, Sherry, Whiskey.	Odor threshold in water = 20 ppb -(van Gemart, L.J., Compilations of odour threshold values in air & water & other, Publisher: Oliemans Punter & Partners, The Netherlands, 2003 Edition) Frutarom describes the odor/flavor properties as Apple (cider), Peach, Tropical, Rum, W hiskey. Interchim describes the odor/flavor properties as Fruity, apple, tomato, banana, sherry, apricot, mango. Moellhausen …	odorant					odor	fruity	odor	green	apple	pineapple	tropical fruit	mango	apricot	cognac			1	0	1	0	0	0	0	0	0	0	0	0
1	1	1	CC(C)CCOC(=O)C(C)O	achiral	Isoamyl-lactate	1	1748	1765	2115	Isoamyl lactate		Isoamyl lactate; Isopentyl lactate	3-Methylbutyl 2-hydroxypropanoate	Pleasant weak oily-winey-fruity, somewhat caramellic odor	C8 H16 O3	160.211	19329-89-6	Nature Identical	Cognac, Rum, Bourbon whisky, Scotch whisky, Sherry, W hite & Red wines, Port wine, Brandies (Pear, Plum, Cherry, Apple)	Boelens indicates: mild, fruity, somewhat caramellic, burnt (FRM2001) Arctander indicates -Very mild oily-winey odor. Lluch Essence indicates -Very mild, sweet, oily, somewhat caramel like Possibly used in Milk, Butter, Butterscotch, Caramel, Chocolate, Coconut, Toffee, Yogurt, Cheese and as a modifier in Fruit flavors. This material appeared in the addendum to the 3d Edition of the Council of Eu…	odorant					odor	pleasant	weak	oily	winey	fruity	caramellic	odor					1	0	0	0	1	0	0	0	0	0	0	0
1	1	1	CC(C)CCOC(=O)CCC(C)=O	achiral	isoamyl-levulinate	1	1750	1767	2117	Isoamyl levulinate		Isoamyl levulinate; Isoamyl 4-oxopentanoate	3-methylbutyl 4-oxopentanoate	Mild, winey, oily-caramellic and slightly fruity	C10 H18 O3	186.248	71172-75-3	Artificial	#N/A	Arctander indicates: "Warm, winey-carameliic odor of good tenacity. Mild, oily-caramellic and slightly fruity taste." JECFA indicates -Light ethereal carmellic aroma Possible uses include cognac, brandy, fruit and caramellic flavors. Normal use levels in finished products: Baked goods (0.01/0.1 ppm); non-alcoholic beverages (1/10 ppm); alcoholic beverages (0.1/0.7 ppm); Chewing gum, Fruit ices (0…	odorant					unspecified odorant	mild	winey	oily	caramellic	weak	fruity						1	0	0	0	1	0	0	0	0	0	1	0
1	1	1	CCCCCCCC(=O)OCCC(C)C	achiral	Isoamyl-octanoate	1	1754	1771	2122	Isoamyl octanoate		Isoamyl octanoate; Isopentyl octanoate; Isoamyl caprylate;	Isopentyl octylate; 3-Methylbutyl caprylate; Isoamyl octylate; 3-Methylbutyl octylate; 3-Methylbutyl octanoate;	Oily, fruity, somewhat winey-cognac; waxy-fatty, green pineapple notes	C13 H26 O2	214.338	2035-99-6	Nature Identical	Apple, Banana, Beer, Grape, Grape Brandy, Rum, Strawberry, Whiskey, Wine.	Interchim describes the odor/flavor properties as Sweet fruity odor and taste, useful in banana and fruit flavors. Seoul Perfumery Co., Ltd. indicates -Sweet fruity odor and taste, useful in banana and fruit flavors. Oxford (now Frutarom) indicates: Odour Description -Fruity, Soapy, Sweet, W axy Suggested Uses -Alcoholic Beverages, Apple, Cheese, Chocolate, Hard Fruits, Pineapple Aldrich indicate…	odorant					unspecified odorant	oily	fruity	winey	cognac	waxy	fatty	green	pineapple				1	0	1	0	0	1	0	0	1	0	0	0
1	1	1	CCC(=O)OCCC(C)C	achiral	Isoamyl-propionate	1	1759	1776	2127	Isoamyl propionate		Isoamyl propionate; Isopentyl propionate; Isoamyl propanoate;	3-Methylbutyl propionate; Isopentyl propanoate; 3-Methylbutyl propanoate;	Sweet, fruity, apricot-banana-pineapple-plum tropical notes	C8 H16 O2	144.208	105-68-0	Nature Identical	Apple, Banana, Beer, Grape Brandy, Hop Oil, Rum, Wine.	Frutarom describes the odor/flavor properties as Apricot, Pineapple, Rum. Interchim describes the odor/flavor properties as Sweet fruit odor and taste, used in banana, apricot, pineapple. Oxford (now Frutarom) indicates: Odour Description -Apricot, Fruity, Ripe, Sweet Suggested Uses -Cheese, Cherry, Chocolate, Hard Fruits, Orange, Peach, Soft Fruits, Strawberry, Tropical Fruits Boelens indicates …	odorant					unspecified odorant	sweet	fruity	apricot	banana	pineapple	plum	tropical fruit					1	1	0	0	0	0	0	0	0	0	0	0
1	1	1	CC(C)CCOC(=O)C(C)=O	achiral	Isoamyl-pyruvate	1	1760	1777	2128	Isoamyl pyruvate		Isoamyl pyruvate; Isopentyl pyruvate; 3-Methylbutyl pyruvate;	Isopentyl 2-oxopropionate; Isopentyl 2-ketoproponoate; Isoamyl 2-oxopropionate; Isoamyl 2-ketoproponoate;	Sweet, fruity, caramellic-rum like odor and taste	C8 H14 O3	158.195	7779-72-8	Artificial	Not considered Nature Identical by IOFI	Boelens indicates -fruity, burnt sugar, caramellic flavor (FRM 2001) The Good Scents Co. indicates -caramellic balsamic rummy arrack fruity odor JECFA indicates -a fresh, caramel-rum odour with fruity-floral undertone Burdock indicates -fresh, caramel-rum odor with fruity, floral undertones (Fenaroli’s Handbook of Flavor Ingredients, Fifth Edition. CRC Press, 2004 p. 911) Arctander indicates -Fre…	odorant + taste					odor idem taste	sweet	fruity	caramellic	rum	odor	taste						1	1	0	0	0	0	0	0	0	0	0	0
1	1	1	CC(C)COC(C)=O	achiral	Isobutyl-acetate	1	1785	1802	2153	Isobutyl acetate		Isobutyl acetate;	2-Methyl-1-propyl acetate; Isobutyl ethanoate;	Fruity, banana-apple-pear-pineapple notes	C6 H12 O2	116.158	110-19-0	Nature Identical	Apple, Banana, Cocoa, Fig, Grape, Grape Brandy, Pear, Pineapple, Sherry, Strawberry, Wine.	Odor threshold in water: 66 ppb. Oxford (now Frutarom) indicates: Odour Description -Etheral, Floral, Fruity, Pear Suggested Uses -Alcoholic Beverages, Apple, Cherry, Chocolate, Dairy Products, Hard Fruits, Peach, Raspberry, Soft Fruits Mosciano, et. al. report for a natural sample that this material has a "sweet, fruity, ethereal with an apple banana nuance "odor and a "sweet, fruity with a bana…	odorant					unspecified odorant	fruity	banana	apple	pear	pineapple							1	0	0	0	0	0	0	0	0	0	0	0
1	1	1	C\\C=C\\C(=O)OCC(C)C	achiral	Isobutyl-2-butenoate	1	1791	1808	2159	Isobutyl crotonate	Isobutyl butenoate	Isobutyl butenoate; Isobutyl 2-butenoate;	Isobutyl crotonate; 2-Methylpropyl 2-butenoate; Isobutyl but-2-enoate;	Fruity apple-pineapple, rum like odor; fruity apple-pineapple-rum taste	C8 H14 O2	142.196	589-66-2	Nature Identical	Grape.	Oxford chemicals describes it as: Odour Description -Banana, Fruity, Pineapple, Sweet Suggested Uses -Apple, Banana, Hard Fruits, Liquorice, Pineapple, Plum, Soft Fruits, Tropical Fruits Bedoukian indicates: Odor Description: A fruity, rum-like character. Fragrance Use: Can enhance berry qualities of fragrances. Flavor Use: Very useful in pineapple, apple, blueberry and other berry flavors. Mosci…	odorant + taste					odor diff taste	fruity	apple	pineapple	rum	odor							1	0	0	0	0	0	0	0	0	0	0	0
1	1	1	CCCC(=O)OCC(C)C	achiral	Isobutyl-butyrate	1	1792	1809	2160	Isobutyl butyrate		Isobutyl butyrate; 2-Methylpropyl butanoate;	2-Methyl-1-propyl butyrate; isoButyl butanoate;	Sweet-fruity, reminiscent of pear, pineapple, banana rummy odor/flavor	C8 H16 O2	144.211	539-90-2	Nature Identical	Apple, Banana, Grape Brandy, Honey, Mango, Melon, Rum, Strawberry, W ine.	Fontarome indicates -Fruity odor of apple or pineapple Oxford (now Frutarom) indicates: Odour Description -Fruity, Pineapple, Rum, Sweet Suggested Uses -Alcoholic Beverages, Apple, Caramel, Cherry, Hard Fruits, Peach, Pineapple, Soft Fruits Elan indicates -Sweet, fruity odor with a pineapple-apple note. Vigon indicates -Sweet, fruity, apple-like, pineapple-like odor. Mosciano et al. indicate -Odo…	odorant					odor idem flavor	sweet	fruity	pear	pineapple	banana	rum	odor	flavor				1	1	0	0	0	0	0	0	0	0	0	0
1	1	1	CC(C)COC(=O)CCC1=CC=CO1	achiral	Isobutyl-3-furanpropionate	1	1798	1815	2166	Isobutyl furanpropionate		Isobutyl furanpropionate; Isobutyl 3-(2-furyl)propionate;	Isobutyl Furfurylacetate; Isobutyl 3-(2-furan)-propanoate; Isobutyl 2-furanpropionate; 2-Methylpropyl furanproponoate; Isobutyl furylpropionate;	Fruity, pineapple, winey, brandy-rum odor & taste	C11 H16 O3	196.243	105-01-1	Artificial	Not considered Nature Identical by IOFI	This material was removed from the 4th Edition of the Council of Europe List (1992); it formerly had COE # 2093. IFF indicates: Fruity Pineapple odor. Allured's Perfumer's Compendium (1996) & the IFF Perfumers Compendium describe this material as a "fruity floral note with sweet, woody, pineapple character". Boelens indicates -fresh, somewhat burnt fruity (FRM 2001). Mosciano indicates -Odor: @ 1…	odorant + taste					odor idem taste	fruity	pineapple	winey	brandy	rum	odor	taste					1	0	0	0	0	0	0	0	0	0	0	0
1	1	1	CCCCCC(=O)OCC(C)C	achiral	Isobutyl-hexanoate	1	1800	1817	2169	Isobutyl hexanoate		Isobutyl hexanoate; Isobutyl caproate;	2-Methylpropyl hexanoate; 2-Methylpropyl caproate; Hexanoic acid, Isobutyl ester;	Winey, fruity, pineapple-like odor and taste	C10 H20 O2	172.265	105-79-3	Nature Identical	Apple, Banana, Grape, Grape Brandy, Plum Wine, Quince, Rum, Whiskey, Wine.	Mosciano (1999) describes the odor characteristics @ 2% as "sweet,estry, fruity pineapple, green apple, peach and tropical" and the taste @ 10 ppm as "sweet, fruity, pineapple, green, tropical and estry". (Perfumer & Flavorist, Vol. 24, March/April 1999, p. 50-51) Mosciano, et. al. (1996) describe the odor as "Green, waxy, fresh, fleshy and fruit with tropical and pineapple nuances" and the taste…	odorant + taste					odor idem taste	winey	fruity	pineapple	odor	taste							1	0	0	0	0	0	0	0	0	0	0	0
1	1	1	CC(C)COC(=O)C(C)C	achiral	Isobutyl-isobutyrate	1	1803	1820	2172	Isobutyl isobutyrate		Isobutyl isobutyrate; 2-Methylpropyl 2-methylpropanoate;	Isobutyl 2-Methylpropanoate; Isobutyl isobutanoate; 2-Methyl-1-propyl 2-methylpropanoate; 2-methyl-1-propyl isobutanoate;	Sweet, fruity, winey, pineapple & banana like; non-descrpt tropical	C8 H16 O2	144.211	97-85-8	Nature Identical	Banana, Grape, Hops, Melon, Plum Wine, Sherry, Strawberry, Whiskey, Wine.	Odor threshold in water: 30 ppb. Oxford (now Frutarom) indicates: Odour Description -Fruity, Pineapple, Tropical Suggested Uses -Alcoholic Beverages, Bakery, Banana, Dairy Products, Grape, Pineapple, Soft Fruits, Tropical Fruits Vigon indicates -Fruity odor reminiscent of apple or pineapple. Moellhausen : Odor: strongly fruity, banana-like. Flavor: strongly fruity. Mosciano et al. indicate -"Odor…	odorant					unspecified odorant	sweet	fruity	winey	pineapple	banana							1	1	0	0	0	0	0	0	0	0	0	0
1	1	1	CC(C)COC(=O)C(C)O	achiral	Isobutyl-lactate	1	1806	1823	2175	Isobutyl lactate		Isobutyl lactate; 2-Methylpropyl 2-hydroxypropionate		Weak buttery-fruity-caramellic odor & taste	C7 H14 O3	146.184	585-24-0	Nature Identical	Cognac, White & Red wines, Port wine, Apple brandy, Strawberry wine, Bilberry wine	Boelens indicates -fruity, somewhat caramellic burnt odor/flavor (PMP 2001 & FRM 2001) Possibly used in Milk, Butter, Butterscotch, Caramel, Chocolate, Coconut, Toffee, Yogurt, Cheese and as a modifier in Fruit flavors. This material appeared in the addendum to the 3d Edition of the Council of Europe List (1981) with a "10000" series number for Flavoring substances not fully evaluated (assigned n…	odorant + taste					odor idem taste	weak	buttery	fruity	caramellic	odor	taste						1	0	0	0	1	0	0	0	0	0	0	0
1	1	1	CC(C)COC(=O)CCC(C)=O	achiral	isobutyl-levulinate	1	1807	1824	2176	Isobutyl levulinate		Isobutyl levulinate; Isobutyl 4-oxopentanoate		Mild, oily-caramellic, fruity, herbaceous	C9 H16 O3	172.222	3757-32-2	Artificial	#N/A	Possible uses include cognac, brandy, fruit and caramellic flavors. 3030 CH3 H3C SH	odorant					unspecified odorant	mild	oily	caramellic	fruity	herbaceous							1	0	0	0	0	0	1	0	0	0	1	0
1	1	1	CSC(C)CC(=O)OCC(C)C	achiral	Isobutyl-methylthiobutyrate	1	1812	1829	2182	Isobutyl methylthiobutyrate		Isobutyl methylthiobutyrate; Isobutyl 3-methylthylthiobutyrate	(+/-)-Isobutyl 3-(methylthio)butyrate; 2-Methylpropyl 3-(methylthio)butyrate; 2-Methylpropyl 3-(methylthio)butanoate	Sulfuraceous, tropical-over-ripe fruity, strawberry, cream & cheese notes	C9 H18 O2 S	190.304	127931-21-9	Artificial	Not considered Nature Identical by IOFI	Oxford (now Frutarom) indicates: Odour Description -Dry, Strawberry, Sweet Suggested Uses -Bakery, Dairy Products, Soft Fruits Mosciano, et al. indicate -Odor: @ 1.0%. Sulfurous, cultured dairy creamy and cheese like with fruity nuances of apple, banana and melon. Taste: @ 1.5 PPM. Sweet fruity with cultured creamy and acidic cheesy nuances of butter and cream. Possible applications: Cream, milk,…	odorant					unspecified odorant	sulfuraceous	overripe tropical fruit	strawberry	creamy	cheese							0	0	0	0	0	0	0	0	0	0	0	1
1	1	1	CC(C)COC(=O)C(C)(C)C	achiral	isobutyl-pivalate	1	1817	1834	2187	Isobutyl pivalate		Isobutyl pivalate; Isobutyl 2,2-dimethylpropanoate	Isobutyl trimethylacetate	Strong fruity odor reminiscent of isobutyl isobutyrate	C9 H18 O2	158.238	5129-38-4	Artificial	#N/A	Possible uses include Tropical Fruit, Grape, Pear, Strawberry, Raspberry, Pineapple, W hiskey, W ine, Banana, Butter and Liqueur type flavors. 3045 O CH3 O H3C CH3	odorant					odor	strong	fruity	odor	isobutyl isobutyrate	sweet	winey	pineapple	banana				1	1	0	0	0	0	0	1	0	0	0	0
1	1	1	CCCCCOC(=O)CCSC	achiral	Isoamyl-methylthiopropionate	1	1870	1886	2244	Isopentyl methylthiopropionate		Isopentyl methylthiopropionate; Isoamyl methylthiopropionate;	Isopentyl (3-methylthio)propionate; 3-Methylbutyl (3-methylthio)propanoate	Sulfurous, on dilution tropical fruit, pineapple	C9 H18 O2 S	190.304	93762-35-7	Nature Identical	Passion fruit (yellow)	P. Werkhoff, et. al., Vacuum Headspace Method in Aroma Research: Flavor Chemistry of Yellow Passion Fruits, J. Agric. Food Chem. 1998, 46, 1076-1093 indicate -fruity, estery aroma, pineapple-like. Oxford indicates: Odour Description -Fruity, Pineapple, Sulphurus, Sweet Suggested Uses -Pineapple, Tropical Fruits Boelens indicates -sulfurous fruity, in dilution pineapple-like flavor (FRM 2001) The …	odorant					unspecified odorant	sulfuraceous	tropical fruit	pineapple									0	0	0	0	0	0	0	0	0	0	0	1
1	1	1	CCCCCC(=O)OCCC(C)=C	achiral	isoprenyl-hexanoate	1	1881	1897	2255	Isoprenyl hexanoate		Isoprenyl hexanoate;	3-Methyl-3-buten-1-yl hexanoate; 3-Methylbut-3-en-1-yl hexanoate	Green, fruity, tropical & pineapple note	C11 H20 O2	184.275	53655-22-4	Nature identical	Found in some minor tropical fruits	Used in fruit flavors. Reported in some minor tropical fruits (Franco, M. R. B. and Janzantti, N. S. (2005), Aroma of minor tropical fruits. Flavour and Fragrance Journal, 20: 358–371) 3132 CH3 O O CH3 H2C CH3	odorant					unspecified odorant	green	fruity	tropical fruit	pineapple								1	0	1	0	0	0	0	0	0	0	0	0
1	1	1	CC(C)OC(=O)CC(C)=O	achiral	isopropyl-acetoacetate	1	1890	1906	2266	Isopropyl acetoacetate		Isopropyl acetoacetate; Isopropyl 3-oxobutanoate		Fruity, caramellic, fermented, brandy, heavy fruit-apple notes	C7 H12 O3	144.168	542-08-5	Artificial	#N/A	The characteristic fruity taste of isopropyl acetoacetate blends well in many Fruit flavors, especially Apple, Apricot, Peach, Pear as well as Rum, Brandy, Wine, Cognac and Whiskey types. Provides a background fruity note to Cherry, Raspberry, Strawberry. This material is useful in hard candy and bakery flavors which are subjected to heat in processing. Normal use levels in finished consumer prod…	odorant					unspecified odorant	fruity	caramellic	fermented	brandy	heavy fruit	apple						1	0	0	0	0	0	0	0	0	0	0	0
1	1	1	CCCC(=O)OC(C)C	achiral	Isopropyl-butyrate	1	1892	1908	2269	Isopropyl butyrate		Isopropyl butyrate; Isopropyl butanoate;	2-Propyl butanoate; Butanoic acid, isopropyl ester;	Strong, pineapple-strawberry & buttery odor; fruity green, ripe taste	C7 H14 O2	130.185	638-11-9	Nature Identical	Apple, Kumquat, Cranberry, Strawberry.	Interchim describes the odor/flavor properties as Fruity, pineapple odor, strawberry taste, used in fruit flavors. Oxford (now Frutarom) indicates: Odour Description -Fruity, Ripe, Sweet Suggested Uses -Alcoholic Beverages, Apple, Dairy Products, Hard Fruits, Mango, Plum, Soft Fruits, Strawberry, Tropical Fruits Mosciano et. al. (1994) describes the odor as "sweet, fruity, estery, ethereal, pinea…	odorant + taste					odor diff taste	strong	pineapple	strawberry	buttery	odor							0	0	0	0	0	0	0	1	0	0	0	0
1	1	1	CCCCCC(=O)OC(C)C	achiral	Isopropyl-hexanoate	1	1898	1914	2276	Isopropyl hexanoate		Isopropyl hexanoate; Isopropyl caproate;	2-Propyl Hexanoate; Isopropyl capronate; Isopropyl hexylate; Hexanoic acid, isopropyl ester; 2-Propyl caproate;	Sweet, fruity pineapple-like odor; fruity tropical berry taste	C9 H18 O2	158.238	2311-46-8	Nature Identical	Blue Cheese, Grape, Strawberry.	Interchim describes the odor/flavor properties as Sweet fruity and pineapple odor, berry-like taste; used in fruit flavors. Boelens indicates -fruity, slightly fatty, caprylic; berry-like odor (PMP 2001); fruity, slightly fatty, caprylic flavor (FRM 2001). Arctander (1969) indicates -Refreshing, delicate, sweet fruity odor like pineapple, loganberry. Fresh sweet-fruity, berry-like taste Burdock i…	odorant + taste					odor diff taste	sweet	fruity	pineapple	odor								1	1	0	0	0	0	0	0	0	0	0	0
1	1	1	CC(C)OC(=O)C(C)C	achiral	Isopropyl-isobutyrate	1	1899	1915	2277	Isopropyl isobutyrate		Isopropyl isobutyrate; Isopropyl 2-methylpropanoate;	2-Propyl 2-methylpropanoate; 2-Methylpropanoic acid, isopropyl ester;	Fresh fruity pineapple-pear odor; pineapple-citrus taste	C7 H14 O2	130.185	617-50-5	Nature Identical	Apple, Pineapple, Laurel	Interchim describes the odor/flavor properties as Fruity, pineapple odor and taste. Boelens indicates -fruity, apple-& banana-like odor (PMP 2001) The Good Scents Co. indicates -pineapple sweet fruity citrus pear odor Burdock indicates -intense fruity ethereal odor (Fenaroli’s Handbook of Flavor Ingredients, 5th Edition, CRC Press, 2004, p. 963) Arctander indicates -diffusive light refreshing fru…	odorant + taste					odor diff taste	fresh	fruity	pineapple	pear	odor							1	0	0	0	0	0	0	0	0	0	0	0
1	1	1	CC(C)CCC(=O)OC(C)C	achiral	isopropyl-isohexanoate	1	1900	1916	2278	Isopropyl isohexanoate		Isopropyl isohexanoate; isopropyl 4-methylpentanoate	isopropyl 4-methylvalerate; isopropyl 4-methylpentanoate	Fruity, pineapple-apple notes	C9 H18 O2	158.238	25415-69-4	Artificial	#N/A	Fruity, slightly caprylic; somewhat apple-& banana. Ethereal-fruity, apple-pineapple-winey. Used in fruit flavors. 3165 N H3C C S CH3	odorant					unspecified odorant	fruity	pineapple	apple									1	0	0	0	0	0	0	0	0	0	0	0
1	1	1	CC(C)CC(=O)OC(C)C	achiral	Isopropyl-isovalerate	1	1902	1918	2280	Isopropyl isovalerate		Isopropyl isovalerate; Isopropyl 3-methylbutanoate;	Isopropyl isovalerianate; 2-Propyl 3-methylbutanoate; 3-Methylbutanoic acid, isopropyl ester; Isopropyl isopentanoate;	Ethereal-fruity, apple-pineapple-berry, cheesy odor and taste	C8 H16 O2	144.211	32665-23-9	Nature Identical	Apple.	Mosciano, et al. indicate -"Odor: @ 1.0%. Sharp, sour cheesy valeric acid topnote, fruity berry, apple like, tutti-frutti with overripe blueberry and pineapple nuances. Taste: @ 1 -5 ppm. Ripe, fruity blueberry, apple and pineapple like with fermented nuances and a sharp sour cheesy finish. Possible applications: Berry flavors, apple, pear, tropical fruit blends, pineapple, blueberry, cherry, gra…	odorant + taste					odor idem taste	ethereal	fruity	apple	pineapple	berry	cheese	odor	taste				1	0	0	0	0	0	0	0	0	0	0	0
1	1	1	CC(C)OC(=O)C(C)O	achiral	isopropyl-lactate	1	1903	1919	2281	Isopropyl lactate		Isopropyl lactate; Isopropyl 2-hydroxypropanoate		Buttery, milky, fruity with caramellic note	C6 H12 O3	132.158	617-51-6	Artificial	#N/A	The CAS number for Isopropyl (S)-(-)-lactate is 63697-00-7 Boelens indicates that the related n-propyl lactate is: fruity, burnt, somewhat caramellic (FRM 2001). Faint buttery-fruity odor with caramellic undertone. W eak sweet buttery-caramellic taste. Used in flavor compositions for butter, various fruit flavors, caramel, treacle, butterscotch, rum, etc. Concentration is usually traces (a few pp…	odorant					unspecified odorant	buttery	milky	fruity	caramellic								1	0	0	0	0	0	0	0	0	0	0	0
1	1	1	CCC(C)C(=O)OC(C)C	achiral	Isopropyl-2-methylbutyrate	1	1910	1926	2288	Isopropyl methylbutyrate		Isopropyl methylbutyrate; Isopropyl 2-methylbutyrate;	Isopropyl 2-methylbutanoate; 2-Methylbutanoic acid, isopropyl ester;	Fruity, sweet, apple, pineapple, green, tutti frutti notes	C8 H16 O2	144.211	66576-71-4	Nature Identical	Strawberry.	Mosciano, et. al. (1993), have described the organoleptic properties as follows: Odor as "Fruity, sweet, green, oily, etherial and lifting, tropical with a pineapple nuance" and taste as "Fruity, sweet, apple, pineapple, green, with tutti frutti with citrus nuances" at 10 ppm. (Perfumer & Flavorist, Vol. 18, May/June 1993, p. 54) Vigon indicates -Fruity, sweet, green, oily ethereal, tropical odor…	odorant					unspecified odorant	fruity	sweet	apple	pineapple	green	tutti frutti						1	1	1	0	0	0	0	0	0	0	0	0
1	1	1	CC(=O)CCC(O)=O	achiral	Levulinic-acid	1	1977	1996	2369	Levulinic acid		Levulinic acid; 4-Oxopentanoic acid;	3-Acetylpropionic acid; Gamma-Ketovaleric acid; Laevulic acid; 4-Oxovaleric acid; 4-Ketopentanoic acid;	Weak, caramellic odor; sweet acid caramel taste	C5 H8 O3	116.115	123-76-2	Nature Identical	Caramelized sugars, Wheat Bread.	Mosciano, et. al. report that this material has a "sweet, guaiacol-like, creamy, acidic and slight vanillin-like" odor and an "acidic, sweet, creamy and slight dairy" flavor at 70 ppm. (Perfumer & Flavorist, Vol. 14, November/December 1989, p. 54) Arctander indicates -Mild caramellic odor (almost odorless when pure). Pleasant, acidic taste in dilution accompanied by a caramellic flavor giving the…	odorant + taste					odor diff taste	weak	caramellic	odor									0	0	0	0	1	0	0	0	0	0	0	0
1	1	1	CCC(=O)OC1=C(C)OC=CC1=O	achiral	Maltyl-propionate	1	2010	2029	2414	Maltol Propionate		Maltol Propionate; Maltyl propionate	2-methyl-4-oxo-4H-pyran-3-yl propanoate	Caramellic, fruity-strawberry note odor & taste	C9 H10 O4	182.173	68555-63-5	Artificial	Not considered Nature Identical by IOFI	Mosciano, et. al. (2000) describes the Odor @ 1% as "Rich sweet baked cookie, similar to furaneol with a jamy pineapple, berry and sweet tropical nuance" and the Taste @ 10-60 PPM as "Sweet, brown caramellic, fruity and jamy, with nuances of bread crust, butterscotch and tropical notes." (Perfumer & Flavorist, Vol. 25, September/October 2000, p. 77) Bedoukian indicates: Odor Description: A carame…	odorant + taste					odor idem taste	caramellic	fruity	strawberry	odor	taste							1	0	0	0	0	0	0	0	0	0	0	0
1	1	1	CCCC(=O)OC1=C(C)OC=CC1=O	achiral	maltol-butyrate	1	2011	2030	2415	Maltol butyrate		Maltol butyrate; 2-methyl-4-oxo-4H-pyran-3-yl butyrate	2-methyl-4-oxo-4H-pyran-3-yl butanoate	Caramel-like, fruity, berry note	C10 H12 O4	196.2	67860-01-9	Artificial	#N/A	A caramel-like, fruity, strawberry note. Used in strawberry, blueberry and raspberry flavors. Boelens indicates -roasted, fruity; caramellic note, somewhat burnt (FRM 2001) Other possible Applications: Baked cookie flavors, caramel, strawberry, pineapple, fruit syrups and sweetness enhancers, butterscotch, malt and apricot. 3364 O O CH3 O CH3 O CH3	odorant					unspecified odorant	caramellic	fruity	berry									1	0	0	0	0	0	0	0	0	0	0	0
1	1	1	CC(C)C(=O)OC1=C(C)OC=CC1=O	achiral	Maltyl-2-methylpropanoate	1	2012	2031	2416	Maltyl 2-methylpropanoate		Maltol isobutyrate; Maltyl 2-methylpropanoate;	2-Methyl-4-pyron-3-yl 2-methylpropanoate; Maltol isobutyrate; Maltyl 2-methylpropanoate; Maltol 2-methylpropanoate; 2-Methylpropanoic acid, maltol ester;	Sweet, caramellic, sugary, strawberry-like odor and taste	C10 H12 O4	196.2	65416-14-0	Artificial	Not considered Nature Identical by IOFI	Interchim describes the odor/flavor properties as a sweet strawberry-like odor with creamy note. Berry flavors. Bedoukian indicates: Odor Description: A sweet strawberry odor. Fragrance Use: Does especially well in 'Otto of rose' compositions. Flavor Use: Used in strawberry, blueberry and raspberry flavors Mosciano, et. al. (1993), have described the organoleptic properties as follows: Odor as "S…	odorant + taste					odor idem taste	sweet	caramellic	sugar	strawberry	odor	taste						0	1	0	0	0	0	0	0	0	0	0	0
1	1	1	CC1=C(O)C(=O)C=CO1	achiral	Maltol	1	2013	2032	2417	Maltol		Maltol; Veltol ; Corps praline; Palatone	3-Hydroxy-2-methyl-4H-Pyran-4-one; Larinxinic acid; 3-Hydroxy-2-methyl-gamma-Pyrone; Palatone; Veltol (PFIZ); 3-Hydroxy-2-methyl-4-pyrone; 2-Methylpyromeconic acid;	Sweet, fruity, berry, caramellic odor; strawberry, fruity preserve-like	C6 H6 O3	126.11	118-71-8	Nature Identical	Burley Tobacco, Caramel, Chicory, Cocoa, Coffee, Milk, Roasted Malt, Strawberry, Wheat Bread.	Odor threshold in water: 35,000 ppb. Flavor threshold in water: 7,100 ppb. Mosciano, et. al. (1992), have described the organoleptic properties as follows: Odor as "Sweet, caramellic, cotton candy, jamy fruity, burnt with a bready nuances" and taste as "Sweet, cotton candy, caramellic, with jamy fruity and berry notes" at 100 ppm. (Perfumer & Flavorist, Vol. 17, July/August 1992, p. 36) Mosciano,…	odorant					odor	sweet	fruity	berry	caramellic	odor	strawberry	fruit preserves					1	1	0	0	0	0	0	0	0	0	0	0
1	1	1	CCC1OC(=O)C(=C1C)O	achiral	maple-furanone	1	2014	2033	2418	Maple furanone	temporairement "Abhexone" ; annulé	Maple furanone; 5-Ethyl-3-hydroxy-4-methyl-2(5H)-furanone;	Emoxyfurone, 4-Methyl-5-ethyl-3-hydroxy-2(5H)-furanone; 4-Ethyl-2-hydroxy-3-methylbut-2-en-1,4-olide; 2-Ethyl-3-methyl-4-hydroxydihydro-2,5-furan-5-one;	Powerful maple-caramel aroma and taste	C7 H10 O3	142.152	698-10-2	Nature Identical	Vegetable protein hydrolysate (shoyu), coffee	Odor threshold in water: 0.00001 ppb. Bedoukian indicates: Odor Description: Intense maple, caramel odor. Fragrance Use: Used for a fenugreek note. Flavor Use: Used in brown sugar, caramel and artificial maple flavors. Givaudan indicates: Organoleptic character -Soupy, Maple Description -This chemical has a very strong odor and should be used at very low levels. It is recommended to use as a dilu…	odorant + taste					aroma idem taste	strong	maple	caramellic	aroma	taste							0	0	0	0	0	0	0	1	0	0	0	0
1	1	1	CCCC(=O)OCCCSC	achiral	3-Methylthiopropyl-butyrate	1	2110	2129	2540	Methionyl butyrate		Methionyl butyrate; 3-(Methylthio)propyl butyrate	3-(Methylthio)propyl butanoate;	Sulfurous, cheese-like, mushroom-savory, pineapple, tropical fruit	C8 H16 O2 S	176.277	16630-60-7	Nature Identical	Firmenich indicates: Naturally found in cheese powder and yellow passion fruit.	Note* -at the time of this writing, this material has been assigned an EC Flavis number, but not officially been placed on the EC Register List. The new Flavis number is 12.277 Odor threshold in water = 10-20 ppb. Firmenich indicates: Powerful fruity, pineapple, mushroom and cheese notes. METHIONYL BUTYRATE is the best choice for pineapple juicy character. It is also excellent for cheese and mush…	odorant					unspecified odorant	sulfuraceous	cheese	mushroom	savory	pineapple	tropical fruit						0	0	0	0	0	0	0	0	0	0	0	1
1	1	1	CCC(=O)\\C=C\\C1=CC=C(OC)C=C1	achiral	1-p-Methoxyphenyl-1-penten-3-one	1	2139	2158	2581	Methoxyphenylpentenone		Methoxyphenylpentenone; 1-(p-Methoxyphenyl)-1-penten-3-one;	alpha-Methyl anisylidene acetone; Ethone; p-Methoxystyryl ethyl ketone; alpha-Methyl anisalacetone;	Sweet, buttery, caramellic odor; vanilla-creamy, sweet, fruity taste	C12 H14 O2	190.238	104-27-8	Artificial	Not considered Nature Identical by IOFI	Fischetti (1980) indicates the taste of this material to be creamy-buttery. Mosciano, et.al. (1998) describe the Odor Characteristics as "Sweet, powdery, cherry, vanilla, coumarin, heliotropine" and the Taste Characteristics as "Sweet, powdery, vanilla, fruity, creamy". (Perfumer & Flavorist, Vol. 23, September/October 1998, p. 50) JECFA indicates -a sweet, buttery, caramellic odour Boelens indic…	odorant + taste					odor diff taste	sweet	buttery	caramellic	odor								0	1	0	0	0	0	0	0	0	0	0	0
1	1	1	COC1=CC=C(\\C=C\\C(=O)C(C)C)C=C1	achiral	Methoxystyryl-isopropyl-ketone	1	2149	2168	2593	Methoxystyryl isopropyl ketone		Methoxystyryl isopropyl ketone; "Homo-Ethone";	1-(4-Methoxyphenyl)-4-methyl-1-penten-3-one; Isopropyl 4-methoxystyryl ketone;	Caramel-fruity; slight buttery odor; caramellic-fruity taste	C13 H16 O2	204.265	103-13-9	Artificial	Not considered Nature Identical by IOFI	JECFA indicates -a buttery, caramellic odour The Good Scents Co. indicates -caramel fruity buttery odor @ 10% dilution Boelens indicates -sweet aromatic, somewhat balsamic & fruity; raspberry-like odor/flavor (PMP 2001 & FRM 2001) Arctander indicates -Caramellic-fruity odor with a distinct buttery topnote. The taste is sweet-caramellic with fruity, berry like notes. Useful in fruit flavors such a…	odorant + taste					odor diff taste	caramellic	fruity	weak	buttery	odor							1	0	0	0	1	0	0	0	0	0	0	0
1	1	1	COC(=O)C[C@@H](C)OC(C)=O	chiral	Methyl-3-acetoxybutyrate	1	2156	2175	2601	Methyl acetoxybutyrate		Methyl acetoxybutyrate; Methyl 3-acetoxybutyrate		Fruity with apple-pineapple tropical fruit notes	C7 H12 O4	160.168	89422-42-4	Nature identical	Pineapple	Previously assigned Flavis No. 09.628 *Note -COMMISSION DECISION of 7 April 2004 amending Decision 1999/217/EC as regards the EC register of flavouring substances: Deleted from list. Used in tropical & other fruit flavors. 3625 H3C O O CH3 O	odorant					unspecified odorant	fruity	apple	pineapple	tropical fruit								1	0	0	0	0	0	0	0	0	0	0	0
1	1	1	COC(=O)CCCC(C)OC(C)=O	achiral	Methyl-5-acetoxyhexanoate	1	2160	2179	2605	(+/-)-Methyl 5-acetoxyhexanoate		Methyl acetoxyhexanoate; (+/-)-Methyl 5-acetoxyhexanoate	Methyl 5-(acetyloxy)-hexanoate	Fruity, pineapple, apple notes	C9 H16 O4	188.221	35234-22-1	Nature identical	Pineapple	JECFA indicates -Fruity aroma The Good Scents Co. indicates -fruity odor @ 10% dilution Used in tropical & other fruit flavors. Normal use levels: 10-40 ppm This material appeared in the addendum to the 3d Edition of the Council of Europe List (1981) with a "10000" series number for Flavoring substances not fully evaluated (assigned numbers 10,001 upwards). Accordingly, we have included this numb…	odorant					unspecified odorant	fruity	pineapple	apple									1	0	0	0	0	0	0	0	0	0	0	0
1	1	1	COC(=O)C(C)C(C)OC(C)=O	achiral	Methyl-3-acetoxy-2-methylbutyrate	1	2161	2180	2607	Methyl acetoxymethylbutyrate		Methyl acetoxymethylbutyrate; Methyl 3-acetoxy-2-methylbutyrate		Burnt, fruity with some pineapple & tropical fruit connotations	C8 H14 O4	174.194	139564-42-4	Nature identical	Pineapple	Previously assigned Flavis No. 09.627 *Note -COMMISSION DECISION of 7 April 2004 amending Decision 1999/217/EC as regards the EC register of flavouring substances: Deleted from list. Described as having a "burnt" odor; The descriptive analysis was done with an aqueous solution of each compound at the level of 1-10 ppm. (Katsumi Umano, Yukio Hagi, Kazuaki Nakahara, Akihiro Shoji, and Takayuki Shib…	odorant					unspecified odorant	burned	fruity	pineapple	tropical fruit								1	0	0	0	0	0	0	0	0	0	0	0
1	1	1	COC(=O)C1=CC=CO1	achiral	Methyl-2-furoate	1	2206	2225	2660	Methyl furoate		Methyl furoate; Methyl 2-furoate;	Methyl pyromucate; Furoic acid, methyl ester;	Fruity, earthy, caramellic, winey; sweet, heavy buttery-nut taste	C6 H6 O3	126.11	611-13-2	Nature Identical	Coffee, Dried Bonito, Guava, Potato, Grape Brandy, Roasted Hazelnut, Roasted Peanut, Honey, Passion Fruit, Roasted Almond, Tomato, Wine.	Bedoukian describes this as: Odor Description: A nutty, peppermint, tobacco odor with mushroom undertones. Fragrance Use: For an earthy, tobacco, minty note in specialty fragrances. Flavor Use: Used in tobacco, nut, coffee and mushroom flavors. Mosciano reports this as: "Odor: @ 1.0 percent. Musty, sweet caramel, fruity, cocoa, bready and slightly rubbery. Taste: @ 20 PPM. Brothy, yeasty, caramel…	odorant + taste					unspecified odorant diff taste	fruity	earthy	caramellic	winey								1	0	0	0	0	0	0	0	0	0	0	0
1	1	1	COC(=O)CO	achiral	methyl-2-hydroxyacetate	1	2208	2227	2662	Methyl 2-hydroxyacetate		Methyl glycolate; Methyl 2-hydroxyacetate	Methyl glycolate	Mild, ethereal, burnt sugar, caramellic odor	C3 H6 O3	90.078	96-35-5	Nature Identical	Bourbon Vanilla	Possible uses include caramellic, fruity, vanilla and roasted flavors. 3706 O CH3 H3C O	odorant					odor	mild	ethereal	burnt sugar	caramellic	odor							0	0	0	0	0	0	0	0	0	0	1	0
1	1	1	CCCCCC(=O)SC	achiral	S-Methyl-hexanethioate	1	2210	2229	2664	Methyl hexanethioate		Methyl hexanethioate; S-Methyl hexanethioate;	Methyl thiocaproate; Methyl thiohexanoate;	Sulfurous, green, cheese, tropical-fruit-pineapple on dilution	C7 H14 O S	146.251	20756-86-9	Nature Identical	Hop oil, Durian, Beer	Odor threshold in water: 0.3 ppb The Japanese Flavor List gives the CAS Number as 2432-77-1 as does Oxford (Frutarom), Treatt & Endeavor Oxford (now Frutarom) indicates: Odour Description -Fruity, Green, Sulphurus Suggested Uses -Cheese, Citrus Fruits, Dairy Products, Mango, Pineapple, Soft Fruits, Tropical Fruits Treatt indicates -Odour: Cabbage, ripe Camembert, rancid, floral green (grass, matu…	odorant					unspecified odorant	sulfuraceous	green	cheese	tropical fruit	pineapple							0	0	1	0	0	0	0	0	0	0	0	1
1	1	1	CCCCCC(=O)OC	achiral	Methyl-hexanoate	1	2211	2230	2665	Methyl hexanoate		Methyl hexanoate; Methyl caproate;	Hexanoic acid, methyl ester; Caproic acid, methyl ester;	Ethereal fruity (pineapple-apple) odor; sweet fruity taste	C7 H14 O2	130.185	106-70-7	Nature Identical	Apple, Black Currant, Blue Cheese, Cider, Guava, Grape, Pineapple, Raspberry, Soursop, Strawberry, W hiskey, Wine.	Odor threshold in water: 70 ppb. Oxford (now Frutarom) indicates: Odour Description -Etheral, Fruity, Pineapple Suggested Uses -Apple, Cheese, Cranberry, Hard Fruits, Passion Fruit, Pineapple, Soft Fruits, Tropical Fruits Interchim describes the odor/flavor properties as Fruity, pineapple. Fontarome indicates -Ethereal, pineapple-apricot odor. Poor tenacity. Burdock indicates -ethereal odor remin…	odorant + taste					odor diff taste	ethereal	fruity	pineapple	apple	odor							1	0	0	0	0	0	0	0	0	0	0	0
1	1	1	CC/C=C/CC(=O)OC	achiral	methyl-3E-hexenoate	1	2213	2232	2668	Methyl trans-3-hexenoate	Methyl 3-hexenoate	Methyl hexenoate; Methyl 3-hexenoate;	Methyl hex-3-enoate;	Fruity, honey, pineapple, green-tropical odor and taste	C7 H12 O2	128.169	2396-78-3	Nature Identical	Guava, Pineapple, Virginia Tobacco, Lulo, Strawberry Guava	Bedoukian indicates for Methyl trans-3-Hexenoate: has a robust, clover honey-type odor with a nuance of cooked pineapple. It would do well in a honey, pineapple, banana flavor or can be used sparingly for body and fruitiness in heavy fragrances. Bedoukian also indicates -Odor Description: A robust, fruity odor reminiscent of cooked pineapple. Fragrance Use: Use sparingly for body and fruitiness i…	odorant + taste					odor idem taste	fruity	honey	pineapple	green	tropical fruit	odor	taste					1	0	1	0	0	0	0	0	0	0	0	0
1	1	1	CC\\C=C/CC(=O)OC	achiral	methyl-3Z-hexenoate	1	2214	2233	2669	Methyl cis-3-hexenoate		Methyl hexenoate; Methyl cis-3-hexenoate	Methyl (Z)-hex-3-enoate	Fruity-green, pineapple odor and taste	C7 H12 O2	128.169	13894-62-7	Nature Identical	Lulo Frult, Guava fruit, Starfruit, Black tea, Soursop, Yellow Passion fruit, Pineapple	Note* -at the time of this writing, this material has been assigned an EC Flavis number, but not officially been placed on the EC Register List. The Flavis number is 09.937 JECFA indicates -Fruity, floral aroma Useful in tropical fruit flavors; pineapple, passion fruit, grape or banana flavor. *May be covered under the EC Register FLAVIS No. 09.267 Summary of Evaluations Performed by the Joint FA…	odorant + taste					odor idem taste	fruity	green	pineapple	odor	taste							1	0	1	0	0	0	0	0	0	0	0	0
1	1	1	CCCCCC(O)CCCC(=O)OC	achiral	Methyl-5-hydroxydecanoate	1	2216	2235	2672	Methyl hydroxydecanoate		Methyl hydroxydecanoate; Methyl 5-hydroxydecanoate		Sweet fruity somewhat pineapple, also a precursor of delta-decalactone	C11 H22 O3	202.291	101853-47-8	Artificial	#N/A	The corresponding ethyl ester is found in Finnish Wild strawberries and is transformed into delta-decalactone in the juice. The ethyl ester is also found in raspberry. Ethyl 5-hydroxydecanoate has been described as a "sweet, pineapple like odor" (Alain Latrasse, Fruits III, in H. Maarse, Volatile compounds in foods and beverages, N. Dekker, Pub., 1991, p. 364) and is considered to be a precursor …	odorant + role					unspecified diff role	sweet	fruity	pineapple									1	1	0	0	0	0	0	0	0	0	0	0
1	1	1	COC(=O)C(C)C	achiral	Methyl-2-methylpropanoate	1	2219	2238	2677	Methyl isobutyrate		Methyl isobutyrate; Methyl 2-methylpropanoate;	Methyl isobutanoate; Isobutyric acid, methyl ester; 2-Methylpropanoic acid, methyl ester;	Fruity, apple-pineapple-apricot-rum like odor and juicy fruit taste	C5 H10 O2	102.132	547-63-7	Nature Identical	Apple, Banana, Grape, Kiwi, Kumquat, Melon, Papaya, Pineapple, Strawberry.	Odor threshold in water: 7 ppb. Oxford (now Frutarom) indicates: Odour Description -Apple, Floral, Fruity, Pineapple, Sweet Suggested Uses -Alcoholic Beverages, Apple, Apricot, Dairy Products, Hard Fruits, Kiwi, Peach, Pineapple, Soft Fruits, Tropical Fruits Interchim describes the odor/flavor properties as Fruity, rum odor and taste. Mosciano et. al. (1994) describes the odor as "ethereal, diffu…	odorant + taste					odor diff taste	fruity	apple	pineapple	apricot	rum	odor						1	0	0	0	0	0	0	0	0	0	0	0
1	1	1	COC(=O)CC(C)C	achiral	Methyl-3-methylbutanoate	1	2222	2241	2682	Methyl isovalerate		Methyl isovalerate; Methyl 3-methylbutanoate;	Methyl isovalerianate; Methyl isopentanoate; Methyl 3-methylbutyrate; 3-methylbutanoic acid, methyl ester;	Strong, fruity, ethereal, pineapple-apple & juicy fruit odor and taste	C6 H12 O2	116.158	556-24-1	Nature Identical	Apple, Banana, Honey, Peach, Peas, Pineapple, Strawberry.	Oxford (now Frutarom) indicates: Odour Description -Apple, Fruity, Pineapple, Powerful Suggested Uses -Alcoholic Beverages, Apple, Cherry, Dairy Products, Hard Fruits, Peach, Pineapple, Soft Fruits, Tropical Fruits Interchim describes the odor/flavor properties as Fruity, apple. Fontarome indicates -Very diffusive apple pineapple-like odor Mosciano, et al. indicate -"Odor: @ 1.0%. Sweet, ethereal…	odorant + taste					odor idem taste	strong	fruity	ethereal	pineapple	apple	juicy fruity	odor	taste				1	0	0	0	0	0	0	1	0	0	0	0
1	1	1	COC(=O)C(C)O	achiral	Methyl-2-hydroxypropionate	1	2224	2243	2684	Methyl lactate		Methyl lactate; Methyl 2-hydroxypropionate		Buttery, ethereal rum with milky caramellic notes	C4 H8 O3	104.105	27871-49-4	Nature Identical	White & Red wines, Port wine, Vanilla	The 2009 Japanese Flavor List gives the CAS number as 547-64-8 which is for the racemic product which has an EINECS number of 214-918-6. CAS number 27871-49-4 is for the more commonly encountered (-)-(S)-methyl lactate. Boelens indicates -fruity, somewhat burnt, sweet caramellic flavor (FRM 2001) Possibly used in Milk, Butter, Butterscotch, Caramel, Chocolate, Coconut, Toffee, Yogurt, Cheese and …	odorant					unspecified odorant	buttery	ethereal	rum	milky	caramellic							0	0	0	0	0	0	0	0	0	0	0	0
1	1	1	COC(=O)CCC(C)=O	achiral	methyl-levulinate	1	2225	2244	2686	Methyl levulinate		Methyl levulinate; Methyl 4-oxopentanoate	Methyl 4-oxovalerate	Fruity, somewhat burnt-caramellic & green	C6 H10 O3	130.142	624-45-3	Nature Identical	Aqueous smoke flavouring from the aromatic plant Thymus vulgaris L., Acid hydrolyzed soy protein	Boelens indicates: caramellic fruity, somewhat burnt (FRM 2001). JECFA indicates -Mild carmellic aroma Possible uses include brandy, fruit and caramellic flavors. Normal use levels in finished products: Baked goodsCheese, Fats/Oils, Milk products, Snack foods (3/10 ppm); non-alcoholic beverages (0.01/0.1 ppm); alcoholic beverages (0.3/3 ppm); Frozen dairy (0.05/5 ppm); Fruit ices (0.6/6 ppm); Har…	odorant					unspecified odorant	fruity	burned	caramellic	green								1	0	1	0	0	0	0	0	0	0	0	0
1	1	1	CCCC(C)C(=O)OC	achiral	Methyl-2-methylpentanoate	1	2242	2261	2707	Methyl methylpentanoate		Methyl methylpentanoate; Methyl 2-methylpentanoate;	Methyl 2-methylvalerate;	Fruity, sweet, berry, pineapple, apple, tropical, green melon	C7 H14 O2	130.185	2177-77-7	Nature Identical	Baked Potato, Pepper.	Mosciano, et. al. (1993), have described the organoleptic properties as follows: Odor as "Fruity, sweet, berry, pineapple, apple, banana, green melon and tropical" and taste as "Fruity, green apple, grape, bubble gum and pineapple-like" at 5 ppm. (Perfumer & Flavorist, Vol. 18, May/June 1993, p. 54) Bedoukian has indicated: A powerful fruity character. Used in baked goods, meat products and candy…	odorant					unspecified odorant	fruity	sweet	berry	pineapple	apple	tropical fruit	green melon					1	1	0	0	0	0	0	0	0	0	0	0
1	1	1	CCCCCCCCSC	achiral	methyl-octyl-sulfide	1	2263	2282	2733	Methyl octyl sulfide		Methyl octyl sulfide; 1-(methylthio)octane	methyl(octyl)sulfane	Green, sulfurous, dirty pineapple, fruity tropical, onion, wasabi notes	C9 H20 S	160.321	3698-95-1	Artificial	Beef (boiled, cooked)	Mosciano et al. indicate -Odor: @ 1.0%. Green, sulfurous, dirty juicy pineapple, fruity tropical with onion and wasabi metallic nuances. Taste: 0 1-2 ppm. Musty dirty, tropical fruity juice body, pineapple, with wasabi and radish notes and a stewed tomato nuance. Possible applications: Pineapple, tropical nuances, melon notes, cucumber and wasabi. (Perfermer & Flavorist, July 2009, pp. 50-51). JE…	odorant					unspecified odorant	green	sulfuraceous	dirty	pineapple	tropical fruit	onion	wasabi					0	0	1	0	0	0	0	0	0	0	0	1
1	1	1	CCCC(=O)CC(=O)OC	achiral	methyl-oxohexanoate	1	2266	2285	2738	Methyl oxohexanoate		Methyl oxohexanoate; Methyl 3-oxohexanoate	Methyl 3-ketocaproate; Methyl butyryl acetate; Methyl beta-ketohexanoate; Methyl 3-ketohexanoate; 3-ketohexanoic acid, methyl ester;	Caramellic fruity; somewhat roasted; 2-pentanone precursor	C7 H12 O3	144.168	30414-54-1	Artificial	#N/A	Boelens indicates: caramellic fruity; somewhat roasted (FRM 2001). This material can generate 2-pentanone in cultured dairy products or on heating. Duin (1965) showed that 2-alkanones (odd-numbered C3 -C15) are formed by the thermal decarboxylation of such beta-keto acids (or glyceride esters) on the heating of butterfat. 3813 CH3O O CH3 O CH3	odorant + role					unspecified diff role	caramellic	fruity	roasted									1	0	0	0	0	0	0	0	0	0	0	0
1	1	1	CCC(C)C(=O)C(=O)OC	achiral	Methyl-2-oxo-3-methylpentanoate	1	2267	2286	2739	Methyl oxomethylpentanoate		Methyl oxomethylpentanoate; Methyl 2-oxo-3-methylpentanoate;	Methyl 2-keto-3-methylpentanoate; Methyl 3-methyl-2-oxovalerate; 2-Oxo-3-methylpentanoic acid, methyl ester;	Fruity-caramellic-walnut with rummy notes	C7 H12 O3	144.168	3682-42-6	Artificial	Not considered Nature Identical by IOFI	Boelens indicates -burnt fruity, caramellic note odor (PMP 2001); fresh, fruity, somewhat caramellic flavor United States Patent 5,952,292 by Snowden, et al. September 14, 1999 assigned to Firmenich describes the odor charachter of the homolog ethyl 2-oxo-3-methylpentanoate: "a fruity, walnut note which is very natural and which was not available until today. This unusual combination of fruity co…	odorant					unspecified odorant	fruity	caramellic	walnut	rum								1	0	0	0	0	0	0	0	0	0	0	0
1	1	1	COC(=O)C(C)=O	achiral	Methyl-pyruvate	1	2289	2308	2763	Methyl pyruvate		Methyl pyruvate; Methyl oxopropionate; Methyl 2-oxopropionate		Sweet, fruity-caramellic-spicy, acidic odor; rum-spicy-caramellic taste	C4 H6 O3	102.089	600-22-6	Nature Identical	Honey, Arctic bramble, Mango (canned)	Boelens indicates -caramellic, slightly burnt, fruity (FRM 2001) Sweet, fruity-caramellic odor; rum-spicy-caramellic. Used in rum, caramel, honey, fruit flavors. This material appeared in the addendum to the 3d Edition of the Council of Europe List (1981) with a "10000" series number for Flavoring substances not fully evaluated (assigned numbers 10,001 upwards). Accordingly, we have included this…	odorant + taste					odor diff taste	sweet	fruity	caramellic	spicy	acidic	odor						1	1	0	0	0	0	0	0	0	0	0	0
1	1	1	CCCCC(=O)OC	achiral	Methyl-pentanoate	1	2306	2325	2781	Methyl valerate		Methyl valerate; Methyl pentanoate;	Methyl valerianate; Pentanoic acid, methyl ester;	Ethereal, green-fruity, apple-pineapple like odor and taste	C6 H12 O2	116.158	624-24-8	Nature Identical	Apple, Coffee, Honey, Kiwi, Melon, Papaya, Pineapple, Strawberry, Tea, W ine.	Odor threshold in water: 20-89 ppb. -(van Gemart, L.J., Compilations of odour threshold values in air & water & other, Publisher: Oliemans Punter & Partners, The Netherlands, 2003 Edition) Mosciano (2001) indicates: Odor @ 1.0% -Sweet, tutti frutti, juicy bubble gum-like with a sweaty nuance. It lends a sweet estry, syrupy fruity background. Taste @ 5-20 ppm -Sweet, ripe, fruity with sweaty dairy…	odorant + taste					odor idem taste	ethereal	green fruity	apple	pineapple	odor	taste						0	0	0	0	0	0	0	0	0	0	0	0
1	1	1	CCCCCC(=O)OCC(C)=C	achiral	methylallyl-hexanoate	1	2313	2332	2788	Methylallyl hexanoate		Methylallyl hexanoate; 2-Methylallyl hexanoate	2-methylallyl caproate; 2-methylprop-2-enyl hexanoate; 2-methyl-2-propenyl hexanoate	Sharp-fruity, reminiscent of pineapple in dilution	C10 H18 O2	170.249		Artificial	#N/A	Arctander describes this as "Powerful, somewhat pungent-fruity, slightly gassy odor, in dilution reminiscent of Pineapple. Aqueous dilutions of less than 20 ppm have a sweet-fruity, yet slightly sharp or pungent taste, reminiscent of Pineapple or Gooseberry." Boelens indicates: diffusive, fruity, somewhat caprylic (FRM 2001). This material has a tendency to polymerize and should be stored cold, i…	odorant					unspecified odorant	sharp	fruity	pineapple									1	0	0	0	0	0	0	0	0	0	0	0
1	1	1	CC(C)C(=O)OCC(C)=C	achiral	methylallyl-isobutyrate	1	2314	2333	2789	Methylallyl isobutyrate		Methylallyl isobutyrate; 2-Methylallyl isobutyrate	2-methylprop-2-enyl 2-methylpropanoate; 2-methyl-2-propenyl isobutyrate	Sharp, fresh sweet-fruity, harsh-Pineapple-like, diffusive-ethereal odor	C8 H14 O2	142.196	816-73-9	Artificial	#N/A	Sharp, fresh sweet-fruity, harsh-Pineapple-like, diffusive-ethereal odor. Also reminiscent of chamomille extracts. This material has a tendency to polymerize and should be stored cold, in-the-dark, under nitrogen and with a free radical scavenger such as BHA or BHT. Possible use in flavor compositions for Arak, Banana, Pineapple, Apple, Brandy, Butter, Fruit (Tutti--frutti), Liquor, etc. 3887 O O…	odorant					odor	sharp	fresh	sweet	fruity	harsh	pineapple	diffusive	ethereal	odor			1	1	0	0	0	0	0	0	0	0	0	0
1	1	1	CCCC(=O)OC(C)C(C)C	achiral	methylbutyl-butyrate	1	2353	2372	2831	Methylbutyl butyrate	3-Methyl-2-butyl butyrate	Methylbutyl butyrate; 3-Methyl-2-butyl butyrate	1,2-dimethylpropyl butyrate; 3-methylbutan-2-yl butyrate	Sweet, sharp-fruity ethereal, banana, pineapple, peach, plum	C9 H18 O2	158.238		Artificial	#N/A	Sweet, heavy fruity taste. Odor is fruity, heavy sweet, reminiscent of Banana, peach, apricot & apple. 3943 O O H3C CH3	odorant					unspecified odorant	sweet	sharp	fruity	ethereal	banana	pineapple	peach	plum				1	1	0	0	0	0	0	0	0	0	0	0
1	1	1	CCCCCC(=O)OCC(C)CC	achiral	2-Methylbutyl-hexanoate	1	2359	2378	2837	Methylbutyl hexanoate		Methylbutyl hexanoate; 2-Methylbutyl hexanoate		Fruity, apple-banana-pineapple aroma & taste	C11 H22 O2	186.291	2601-13-0	Nature Identical	Apple, apple juice, Hop oil, Red wine, Port wine, Sherry, Gruyere de Comte cheese, Apricot, Malt whisky	Boelens indicates -fatty-fruity, slightly apple-like; somewhat caprylic odor (PMP 2001); mild fruity, somewhat fatty-caprylic flavor (FRM 2001) This material has a similar profile as Isoamyl hexanoate which is described as "Fruity, apple-banana-pineapple, somewhat waxy aroma & taste " Described as a "a sharp sweat odor" by GC-O (Maria J. Jordán, Kevin L. Goodner and Philip E. Shaw, Characterizati…	odorant + taste					aroma idem taste	fruity	apple	banana	pineapple	aroma	taste						1	0	0	0	0	0	0	0	0	0	0	0
1	1	1	CCC(C)COC(=O)C(C)O	achiral	2-Methylbutyl-lactate	1	2361	2380	2839	Methylbutyl lactate		Methylbutyl lactate; 2-Methylbutyl lactate	2-Methylbutyl 2-hydroxypropionate	Mild oily-winey odor, somewhat carameellic, fruity	C8 H16 O3	160.211	638-33-5	Nature Identical	Port wine	Previously assigned Flavis No. 09.863 *Note -COMMISSION DECISION of 7 April 2004 amending Decision 1999/217/EC as regards the EC register of flavouring substances: Deleted from list. This material has a similar profile as Isoamyl lactate which is described as "Pleasant weak oily-winey-fruity, somewhat caramellic odor" Often sold as a mixture with Isoamyl lactate (which has a similar organoleptic …	odorant					odor	mild	oily	winey	odor	caramellic	fruity						1	0	0	0	0	0	0	0	0	0	1	0
1	1	1	CCC(C)COC(=O)C(C)CC	achiral	2-Methylbutyl-2-methylbutanoate	1	2364	2383	2842	Methylbutyl methylbutyrate		Methylbutyl methylbutyrate; 2-Methylbutyl 2-methylbutanoate;	2-Methylbutyl 2-methylbutyrate;	Fruity, apple, green, waxy, berry, tropical, somewhat pineapple	C10 H20 O2	172.265	2445-78-5	Nature Identical	Melon, Ripened Apple, Strawberry.	Interchim describes the odor/flavor properties as Fruity, apple, pineapple, berry. Mosciano, et al. indicate -"Odor: @ 1.0%. Sweet, sharp ripe fruity apple, waxy with sweet melon, tropical mango and lychee notes. Taste: @ from 10-20 PPM. Sweet, estry, fruity, slightly green apple juicy and tropical with an herbal nuance. Possible applications: Apple, cantaloupe, pear, mango, lychee and other trop…	odorant					unspecified odorant	fruity	apple	green	waxy	berry	tropical fruit	pineapple					1	0	1	0	0	0	0	0	1	0	0	0
1	1	1	CC(C)=CC(O)=O	achiral	3-Methylcrotonic-acid	1	2378	2396	2857	Methylcrotonic acid		Methylcrotonic acid; 3-Methylcrotonic acid; Senecioic acid;	3-Methyl-2-butenoic acid; beta,beta-Dimethylacrylic acid; 3-Methylbut-2-enoic acid; 3,3-Dimethylacrylic acid;	Spicy-caramel-herbaceous musty odor; caramellic, spicy, green fruity taste	C5 H8 O2	100.116	541-47-9	Nature Identical	Coffee, Raspberry, Virginia Tobacco, Spike lavender, Snake fruit, Carob	Mosciano (2003) indicates: Odor: @ 1 percent. Musty, woody, slightly caramellic, ashy tobacco and slightly burnt. Taste: @ 10 ppm -Woody, caramellic, cardboard, ashy tobacco and slightly metallic. Possible Applications: Tobacco, coffee, vanilla, whisky blenders, woody notes of oak. The Aldrich catalog indicates the odor as "green, phenolic, dairy". Boelens indicates -sour, caprylic, slightly frui…	odorant + taste					odor diff taste	spicy	caramellic	herbaceous	musty	odor							0	0	0	0	0	0	1	0	0	0	0	0
1	1	1	CC1=CC(=O)CCC1	achiral	3-Methyl-2-cyclohexen-1-one	1	2385	2403	2864	Methylcyclohexenone		Methylcyclohexenone; 3-Methyl-2-cyclohexen-1-one;	3-Methylcyclohex-2-en-1-one;	Caramel, nutty, musty and minty notes	C7 H10 O	110.154	1193-18-6	Nature Identical	Burley Tobacco, Coffee, Corn (Maize), Roasted Filbert.	Bedoukian indicates: Odor Description: A powerful, nutty, caramel-like odor. Fragrance Use: Imparts a nuttiness to fragrances. Flavor Use: Used in nut flavors. Mosciano, et.al. (1998) describe the odor @ 2.0% as "Sweet, nutty, phenolic, walnut, fruity, almond and benzoin" and the Taste @ 50 ppm as "Nutty, musty, phenolic and woody with grain-like nuances". (Perfumer & Flavorist, Vol. 23, May/June…	odorant					unspecified odorant	caramellic	nutty	musty	minty								0	0	0	0	0	0	0	0	0	0	0	0
1	1	1	CCCC(=O)OC1=C(C)CCC1=O	achiral	Methylcyclopentenolone-butyrate	1	2387	2405	2867	Methylcyclopentenolone butyrate		Methylcyclopentenolone butyrate; Cyclotene butyrate	2-Methyl-5-oxocyclopent-1-enyl butyrate; Maple lactone butyrate	Caramellic, creamy, buttery, slight fruity	C10 H14 O3	182.216	68227-51-0	Artificial	#N/A	Previously assigned Flavis No. 09.654 *Note -COMMISSION DECISION of 26 February 2009 amending Decision 1999/217/EC as regards the EC register of flavouring substances: Deleted from list. Arctander describes this as a Powerful, creamy-caramellic, buttery odor. A sweet creamy-caramellic taste, slightly burning above 30 ppm. The Good Scents Co. indicates -fruity nutty odor JECFA indicates -Fruity nu…	odorant					unspecified odorant	caramellic	creamy	buttery	weak	fruity							1	0	0	0	1	0	0	0	0	0	0	0
1	1	1	CC1=C(O)C(=O)CC1	achiral	Methylcyclopentenolone	1	2388	2406	2868	Methylcyclopentenolone		Methylcyclopentenolone; Cyclotene; Ketonarome; Corylone; MCP;	2-hydroxy-3-methylcyclopent-2-enone; 3-Methylcyclopentane-1,2-dione; 3-Methyl-2-cyclopenten-2-ol-1-one; Maple lactone;	Very strong, caramellic-maple, lovage odor and taste	C6 H8 O2	112.127	80-71-7*	Nature Identical	Cocoa, Coffee, Fenugreek, Licorice, Malt, Roasted Almond, Roasted Onion, Roasted Peanut, Virginia Tobacco, Tobacco smoke, Wheat Bread.	Mosciano, et. al. (1992), have described the organoleptic properties as follows: Odor as "Caramellic, maple, sweet, burnt, coffee, bready nuances" and taste as "Sweet, maple, bready, caramellic with nutty nuances" at 5 ppm. (Perfumer & Flavorist, Vol. 17, July/August 1992, p. 34) Mosciano (2002) also indicates: Odor: @ 1% -Caramellic, burnt sugar, sweet maple, lovage, brown sugar, bread crust, bu…	odorant + taste					odor idem taste	strong	caramellic	maple	lovage	odor	taste						0	0	0	0	0	0	0	1	0	0	0	0
1	1	1	CC1=CC(=O)CC1	achiral	Methylcyclopentenone	1	2389	2407	2869	Methylcyclopentenone		Methylcyclopentenone; 1-Methyl-1-cyclopenten-3-one;	3-Methyl-2-cyclopenten-1-one; 3-Methylcyclopent-2-en-1-one;	Sweet, caramellic, ketonic and somewhat chemical notes	C6 H8 O	96.127	2758-18-1	Nature Identical	Dried Bonito, Roasted Onion, Virginia Tobacco.	Described as a "burnt, rubbery, mouldy, earthy" flavor ((Ivon Flament, Yvonne Bessière-Thomas, Coffee flavor chemistry, W iley & Sons, 2001, p. 138) Boelens indicates -herbal, somewhat fruity, slightly caramellic odor/flavor (PMP 2001 & FRM 2001) Leffingwell, et.al. (1972) describes the flavor on tobacco as "sweet, chemical". The Good Scents Co. indicates -sweet fruity fatty odor @ 1% dilution Th…	odorant					unspecified odorant	sweet	caramellic	ketonic	chemical								0	1	0	0	0	0	0	0	0	0	0	0
1	1	1	CC1OC=CC1=O	achiral	2-Methylfuran-3-one	1	2404	2422	2885	2-Methylfuran-3(2H)-one		Methylfuranone; 2-Methylfuran-3(2H)-one	2-Methyl-2(3H)furanone	Sweet, roasted, caramellic, nutty-bread ike, somewhat buttery	C5 H6 O2	98.1	41763-99-9	Nature identical	Coffee, Peanut (roasted), Yellow passion fruit	Previously assigned Flavis No. 13.156 *Note -COMMISSION DECISION of 26 February 2009 amending Decision 1999/217/EC as regards the EC register of flavouring substances: Deleted from list. Boelens indicates -fresh, burnt-fruity odor (PMP 2001); fruity, roasted, slightly burnt, caramellic note and nutty connotation flavor Used in roasted flavors (e.g. nut), bread, etc. 4023 O H3C O	odorant					unspecified odorant	sweet	roasted	caramellic	nutty	bread	buttery						0	1	0	0	0	0	0	0	0	0	0	0
1	1	1	CC1=CC(=O)CO1	achiral	5-Methylfuran-3-one	1	2405	2423	2887	5-Methylfuran-3(2H)-one		Methylfuranone; 5-Methylfuran-3(2H)-one	5-Methyl-2(3H)furanone	Sweet, roasted, caramellic, nutty-bread ike, somewhat buttery	C5 H6 O2	98.1	3511-32-8	Nature Identical	Peanut (roasted)	Boelens indicates -fruity, roasted, somewhat burnt -and nutty connotation flavor (FRM 2001) Used in roasted flavors (e.g. nut), bread, etc. 4025 SH CH3 O	odorant	2886 et 2887 identiques ; le nom IUPAC est donné pour 2887, à garder : prendre FEMA du 1886 et eec du 1887 et faire une seule entrée, et le noter dans les remarques	FEMA reporté de n° du 1886 (composé identique)	deux entrée identiques pour 5-Methylfuran-3(2H)-one dans FB10		unspecified odorant	sweet	roasted	caramellic	nutty	bread	buttery						0	1	0	0	0	0	0	0	0	0	0	0
1	1	1	CC1=CC=C(O1)C=O	achiral	5-Methylfurfural	1	2408	2426	2890	Methylfurfural		Methylfurfural; 5-Methylfurfural;	5-Methyl-2-furaldehyde;	Sweet spicy, bready, nutty, caramellic odor and taste	C6 H6 O2	110.111	620-02-0	Nature Identical	Baked Potato, Burley Tobacco, Cocoa, Coffee, Cooked Apple, Honey, Roasted Almond, Roasted Onion, Tea, Tomato, Wheat Bread, Whiskey.	Flavor threshold in water: 20,000 ppb. Flavor threshold in orange juice: 10,000 ppb. Bedoukian indicates: Odor Description: A spicy, caramel, almond odor. Fragrance Use: Can be used for nutty, maple, sweet-brown applications. Flavor Use: Used in honey, maple, nut, amaretto and coffee flavors. Oxford (now Frutarom) indicates: Odour Description -Nutty, Caramel, Roast Burnt Suggested Uses -Alcoholic…	odorant + taste					odor idem taste	sweet	spicy	bread	nutty	caramellic	odor	taste					0	1	0	0	0	0	0	0	0	0	0	0
1	1	1	CC1=CC=C(CO)O1	achiral	methylfurfuryl-alcohol	1	2409	2427	2892	Methylfurfuryl alcohol		Methylfurfuryl alcohol; 5-Methylfurfuryl alcohol	5-Methyl-2-furanmethanol; 5-methylfurfurol; (5-methyl-2-furyl)methanol	Sweet caramellic-almond, cereal like, fermented notes	C6 H8 O2	112.127	3857-25-8	Nature Identical	Beer, Malt, Wort, Wine (white), Coffee, Cocoa, Peanut (roasted), Sukiyaki, Barrel aged wines, Commercial Rice cakes, Beef muscle (cooked)	Described by Pisarnitskii as having a "sweet almond tone" (A. F. Pisarnitskii, Formation of W ine Aroma: Tones and Imperfections Caused by Minor Components (Review), Applied Biochemistry and Microbiology, Volume 37, Number 6 / November, 2001, 552-560) Possibly used to modify nut, cereal, fruit anf fermented flavors. Normal use levels in finished products: Frozen dairy (0.01-0.1 ppm); Snack foods …	odorant					unspecified odorant	sweet	caramellic	almond	cereal	fermented							0	1	0	0	0	0	0	0	0	0	0	0
1	1	1	CC(=O)C(=O)C1=CC=C(C)O1	achiral	methylfurylpropanedione	1	2419	2437	2903	Methylfurylpropanedione		Methylfurylpropanedione; 1-(5-methyl-2-furyl)-1,2-propanedione	1-(5-methylfuran-2-yl)propane-1,2-dione; 1-(5-methyl-2-furyl)propane-1,2-dione	Caramellic, burnt note	C8 H8 O3	152.147	1197-20-2	Nature Identical	Licorice, Onion (roasted), W heat bread, Coffee, Malt	This material has been formed also in model food systems by heating 2,3-Dihydro-3,5-dihydroxy-6-methyl-4(H)-pyran-4-one at 150 degrees C. at pH 2.5. G. Brule et al., T. Ann. Technol. Agric., 1971, 20, 305-312, report it has a caramel odor and a flavor threshold of 2 ppm in water (Ivon Flament, Yvonne Bessière-Thomas, Coffee flavor chemistry, Wiley & Sons, 2001, p. 230) Possible uses include caram…	odorant					unspecified odorant	caramellic	burned										0	0	0	0	0	0	0	0	0	0	0	0
1	1	1	CC1=CC=C(O1)\\C=C\\C=O	achiral	3-5-Methyl-2-furylprop-2-enal	1	2420	2438	2905	Methylfurylpropenal 3-(5-Methyl-2-furyl)prop-2-enal		Methylfurylpropenal 3-(5-Methyl-2-furyl)prop-2-enal	1-(5-Methyl-2-furanyl)-1-propen-3-al	Spicy, caramellic, cinnamon notes	C8 H8 O2	136.148	5555-90-8	Nature Identical	Coffee	Boelens indicates -aromatic, somewhat spicy, cinnamon connation (FRM 2001). JECFA indicates -Sweet spicy aroma Used in Spice, Nut and Chocolate flavors. May find some use as a modifier in Fruit & roasted flavors. Summary of Evaluations Performed by the Joint FAO/WHO Expert Committee on Food Additives 3-(5-METHYL-2-FURYL)PROP-2-ENAL COE No.: 1315 FEMA No.: 4175 JECFA No.: 1499 Chemical names: 3-(5…	odorant					unspecified odorant	spicy	caramellic	cinnamon									0	0	0	0	0	0	0	0	0	0	0	0
1	1	1	CCCCCC(=O)C(C)C(C)=O	achiral	3-methylnonane-2-4-dione	1	2481	2500	2979	Methylnonanedione		Methylnonanedione; 3-Methylnonane-2,4-dione	3-Methyl-2,4-nonanedione	Caramellic, green, fruity, hay-like, straw-like; important green tea note	C10 H18 O2	170.249	113486-29-6	Nature Identical	Chinese green tea powder, Japanese Green Tea (Sen-cha), Boiled Carp Fillet, Soybean oil, Black Tea, Anchovy, Butter and butter oil, dry parsley and dry spinach	Odor threshold = 0.01 ng/L of air = 0.00001 ppb Givaudan indicates -Caramel, A bit burnt; Fruity, straw like notes, caramel notes. Recommended application -tea beverage flavours. Recommended use level -2 ppm Mosciano et al. indicate -"Odor: @ 1.0%. Sweet, waxy, creamy dairy, condensed milky and dried milk powder, slightly coconut and musty mushroom nuances, grape and haylike nuances. Taste: @ 1 -…	odorant + role					unspecified diff flavor role	caramellic	green	fruity	hay	straw	green tea						1	0	1	0	0	0	0	0	0	0	0	0
1	1	1	CC\\C=C(/C)C(O)=O	achiral	2-Methyl-2-pentenoic-acid	1	2509	2528	3010	2-Methyl-2-pentenoic acid		Methylpentenoic acid; 2-Methyl-2-pentenoic acid;	Strawberriff (IFF); 2-Methylpent-2-enoic acid;	Sweet, green, caramellic, characteristic strawberry	C6 H10 O2	114.142	3142-72-1	Nature Identical	Strawberry, Virginia Tobacco.	IFF indicates: Odor Profile -Fruity, Strawberry, W oody; Olfactory Description -Dry ''acid'' note found in strawberries. Enhances fruity fragrances. Bedoukian indicates: Odor Description: A sweet strawberry jam odor. Fragrance Use: Used as an enhancer for fruity fragrances. Flavor Use: Used in strawberry and cheese flavors. Mosciano, et. al. report that this material has a sour, acidic, sweaty an…	odorant					unspecified odorant	sweet	green	caramellic	strawberry								0	1	1	0	0	0	0	0	0	0	0	0
1	1	1	CC(=O)\\C(C)=C\\C1=CC=CC=C1	achiral	3-Methyl-4-phenyl-3-buten-2-one	1	2522	2541	3024	Methylphenylbutenone		Methylphenylbutenone; 3-Methyl-4-phenyl-3-buten-2-one;	3-Benzylidene-2-butanone; 1-Methyl-1-benzylideneacetone; alpha-Methyl-alpha-Benzalacetone; Benzylidene methyl ethyl ketone;	Sweet, fruity-caramellic, berry-like; fruity taste	C11 H12 O	160.212	1901-26-4	Artificial	Not considered Nature Identical by IOFI	Boelens indicates -fresh aromatic-fruity, slightly floral on dilution odor (PMP 2001); aromatic, slightly spicy, fruity flavor (FRM 2001) Burdock indicates -a camphor like odor (Fenaroli’s Handbook of Flavor Ingredients, Fifth Edition, CRC Press, 2004, p. 1271) Arctander indicates: Sweet, fruity-caramellic, berry-like odor and a sweet, fruity, cherry-plum like taste below 10 ppm. Somewhat bitter …	odorant + taste					unspecified odorant diff taste	sweet	fruity	caramellic	berry								1	1	0	0	0	0	0	0	0	0	0	0
1	1	1	CC(C)CC(=O)CC1=CC=CC=C1	achiral	4-Methyl-1-phenyl-2-pentanone	1	2529	2548	3032	4-Methyl-1-phenyl-2-pentanone		Methylphenylpentanone; 4-Methyl-1-phenyl-2-pentanone;	Benzyl isobutyl ketone; Isobutyl benzyl ketone;	Woody-spicy, fruity-caramellic odor; fruity-spicy, sweet taste	C12 H16 O	176.255	5349-62-2	Artificial	Not considered Nature Identical by IOFI	JECFA indicates -a sweet, woody, spicy, burnt sugar odour Burdock indicates -a sweet, woody, spicy odor. The flavor is sweet & tart ant low concentations. (Fenaroli’s Handbook of Flavor Ingredients, Fifth Edition, CRC Press, 2004, p. 1277) Arctander indicates -Sweet, slightly woody-spicy, caramellic, fruity odor. The taste is sweet, but somewhat tart, fruity-spicy at <10 ppm and is more fruity at…	odorant + taste					odor diff taste	woody	spicy	fruity	caramellic	odor							1	0	0	0	0	0	0	0	0	1	0	0
1	1	1	CC1OCCC1=O	achiral	2-Methyltetrahydrofuran-3-one	1	2560	2579	3064	2-Methyltetrahydrofuran-3-one		Methyltetrahydrofuranone; 2-Methyltetrahydrofuran-3-one;	Dihydro-2-methyl-3(2H)-furanone; 2-Methyldihydro-3(2H)-furanone; Coffee furanone	Sweet, roasted, bread-like, buttery, rum and caramellic	C5 H8 O2	100.116	3188-00-9	Nature Identical	Cocoa, Coffee, Cooked Beef, Cooked Chicken, Oriental Tobacco, Potato Chips, Pumpkin, Roasted Almond, Roasted Filbert, Virginia Tobacco, Wheat Bread.	Givaudan indicates: Organoleptic character -Bread, Brown, Aromatic, Nutty Description -This chemical is effective in completing brown notes for nut and beef flavours. Recommended flavour usage -Hazelnut, Beef, Fried Potato Recommended use level -5 -10 ppm Oxford (now Frutarom) indicates: Odour Description -Bread, Butter, Caramel, Nutty, Sweet Suggested Uses -Alcoholic Beverages, Bakery, Beef, Cho…	odorant					unspecified odorant	sweet	roasted	bread	buttery	rum	caramellic						0	1	0	0	0	0	0	0	0	0	0	0
1	1	1	CCCCCC(=O)OCSC	achiral	Methylthiomethyl-hexanoate	1	2595	2614	3106	Methylthiomethyl hexanoate		Methylthiomethyl hexanoate;	Hexanoic acid, methylthiomethyl ester	Pineapple, exotic fruity, adds creamy cheesy flavor to dairy flavors	C8 H16 O2 S	176.277	74758-91-1	Artificial?	#N/A	Boelens indicates -fruity, exotic fruit conotations, passion fruit flavor (FRM 2001) Treatt indicates -pineapple, fruity. Use adds a creamy cheesy note to dairy flavors at 0.5 ppm. United States Patent 4,332,829 by van den Bosch, et al. (June 1, 1982) assigned to Polak's Frutal Works, B.V. describe the flavor as: pineapple, fruity An example of a cream flavor containing the material (from United …	odorant + role					unspecified diff flavor role	pineapple	tropical fruit										0	0	0	0	0	0	0	0	0	0	0	0
1	1	1	CSC1=C(O)C=CC=C1	achiral	o-Methylthiophenol	1	2608	2627	3122	o-Methylthiophenol		Methylthiophenol; o-Methylthiophenol; Thioguaiacol;	2-(methylthio)phenol; 2-Methylmercaptophenol; Methyl 2-hydroxyphenyl sulfide; 1-Hydroxy-2-methylmercaptobenzene; 2-Methylthiophenol;	Sulfury burnt odor; meaty, smoky-caramel-beef broth in dilution	C7 H8 O S	140.204	1073-29-6	Nature Identical	Coffee.	Treatt indicates -Odour: Meaty, onion/garlic, sulphurous/eggy; Used in flavours for snack foods at 14 ppm, meat products at 2 ppm, bakery and soups at 0.2 ppm. Reported to have an aroma of beef broth (Baines, D. A,; Mlotkiewicz, J. A. The chemistry of meat flavour. In Recent Advances in the Chemistry of Meat; Bailey, A. J., Ed.; The Royal Society of Chemistry: London, 1984; pp 119-164.). Describe…	odorant					odor	sulfury	burned	odor	meaty	smoky	caramellic	beef broth					0	0	0	0	0	0	0	0	0	0	0	0
1	1	1	CCCCCC(=O)OCCCSC	achiral	methylthiopropyl-hexanoate	1	2613	2632	3128	Methylthiopropyl hexanoate		Methylthiopropyl hexanoate; 3-(Methylthio)propyl hexanoate	Methionol hexanoate	Sulfurous, onion, savory, methional-like; tropical fruit (pineapple)	C10 H20 O2 S	204.331	906079-63-8	Nature Identical	Yellow Passion fruit	Used in meat, allium & savory flavors, tropical fruits (pineapple, passion fruit) and cheese (for a ripe note) as well as vegetable flavors. Described as -tropical fruit note, methional-like, canned pineapple (P. Werkhoff, M. Guntert, G. Krammer, H. Sommer, and J. Kaulen, Vacuum Headspace Method in Aroma Research: Flavor Chemistry of Yellow Passion Fruits, J. Agric. Food Chem. 1998, 46, 1076-1093…	odorant					unspecified odorant	sulfuraceous	onion	savory	methional	meaty	tropical fruit	pineapple					0	0	0	0	0	0	0	0	0	0	0	1
1	1	1	CCCCOC1=CC=C2C=CC=CC2=C1	achiral	naphthyl-butyl-ether	1	2649	2668	3175	Naphthyl butyl ether		Naphthyl butyl ether; beta-Naphthyl butyl ether	Butyl beta-naphthyl ether; 2-butoxynaphthalene; butyl 2-naphthyl ether	Sweet tenacious fruity and floral note reminiscent raspberry and strawberr	C14 H16 O	200.276	10484-56-7	Artificial	#N/A	Interchim indicates: Sweet tenacious fruity and floral note reminiscent raspberry and strawberry odor, with intensely fruity sweet taste in dilution. The Good Scents Co. indicates -sweet fruity floral berry The related isobutoxy isomer (FEMA 3719) is described as -Sweet, strawberry-fruity, neroli-like; sweet fruity taste Used in fruit flavors. Normal use levels in finished products: non-alcoholic…	odorant					unspecified odorant	sweet	strong	fruity	floral	raspberry	strawberry						1	1	0	1	0	0	0	1	0	0	0	0
1	1	1	CC(C)COC1=CC2=CC=CC=C2C=C1	achiral	beta-Naphthyl-isobutyl-ether	1	2651	2670	3177	Naphthyl isobutyl ether		Naphthyl isobutyl ether; beta-Naphthyl isobutyl ether;	Isobutyl beta-naphthyl ether; 2-Isobutoxynaphthalene; isobutyl 2-naphthyl ether	Sweet, strawberry-fruity, neroli-like; sweet fruity taste	C14 H16 O	200.276	2173-57-1	Artificial	Not considered Nature Identical by IOFI	IFF indicates: Odor Profile -Floral, Fruity, Strawberry Olfactory Description -Sweet, musky, strawberry, fruity, orange blossom note. Long lasting Allured's Perfumer's Compendium (1996) decribes the material as Sweet, strawberry, fruity, orange blossom note. Interchim describes the odor/flavor properties as Sweet tenacious fruity and floral note reminiscent raspberry and strawberry odor, with int…	odorant + taste					unspecified odorant diff taste	sweet	strawberry	fruity	neroli								1	1	0	0	0	0	0	0	0	0	0	0
1	1	1	CCCC(=O)C(=O)CCC	achiral	Octane-4-5-dione	1	2776	2796	3328	Octane-4,5-dione		Octanedione; Octane-4,5-dione; 4,5-Octanedione		sweet fatty buttery with creamy, caramelic, fruity, cheese notes	C8 H14 O2	142.196	5455-24-3	Nature identical	Cocoa	Jianchun Xie, Baoguo Sun, Fuping Zheng, Shuaibin W ang, Volatile flavor constituents in roasted pork of Mini-pig, Food chemistry, 2008, vol. 109, no 3, pp. 506-514 -describe the odor as "Green, sweet, buttery" by GC-O. Boelens indicates -burnt, caramellic, slightly fruity odor & flavor (PMP 2001 & FRM 2001) JECFA indicates -At high concentration powerful pungent, fatty buttery aroma; upon dilutio…	odorant					unspecified odorant	sweet	fatty	buttery	creamy	caramellic	fruity	cheese					1	1	0	0	0	1	0	0	0	0	0	0
1	1	1	CCCCC(=O)\\C=C\\C	achiral	2-Octen-4-one	1	2807	2827	3364	2-Octen-4-one		Octenone; 2-Octen-4-one;	Oct-2-en-4-one; Butyl propenyl ketone; Propenyl butyl ketone;	Sweet, green-fruity, vegetative, jammy, pineapple, tropical	C8 H14 O	126.196	4643-27-0	Nature Identical	Wheat Bread.	Givaudan indicates: Organoleptic character -Jammy, Preserves, Tropical Fruit Description -This chemical is helpful in obtaining preserve notes in fruit flavours. Recommended flavour usage -Strawberry, Cherry, Peach, Apricot Recommended use level -2 -5 ppm Treatt indicates -a fruity, pineapple/tropical, "dried apricot" odor and flavor. Fontarome indicates -Very powerful green fruity odor reminisce…	odorant					unspecified odorant	sweet	green fruity	vegetative	jam	pineapple	tropical fruit						0	1	0	0	0	0	0	0	0	0	0	0
1	1	1	CC\\C=C/CCCCOC(C)=O	achiral	Z-5-octenyl-acetate	1	2815	2835	3372	(Z)-5-Octenyl acetate		Octenyl acetate; (Z)-5-Octenyl acetate		banana, melon, estery, juicy, pineapple, green, fruit flesh-like	C10 H18 O2	170.249	71978-00-2	Nature Identical	Banana, Yellow Passion Fruits, Aerangis species, melons	The odor and flavor properties have been described. See Haruyasu. Shiota, New esteric components in the volatiles of banana fruit (Musa sapientum L.), J. Agric. Food Chem., 1993, 41 (11), pp 2056–2062 Odor: banana tissue-like, melon-like, green, coarse, fruit flesh-like, fermented Taste in water: banana-like, melon-like, eatery, juicy, pineapple-like, green, fruit flesh-like (at 2.5 ppm) Normal u…	odorant					unspecified odorant	banana	melon	estery	juicy	pineapple	green	fruity flesh					0	0	1	0	0	0	0	0	0	0	0	0
1	1	1	CC\\C=C/CCCCOC(=O)CC	achiral	cis-5-octenyl-propionate	1	2819	2839	3376	(Z)-5-Octenyl propionate		Octenyl propionate; (Z)-5-Octenyl propionate;	cis--5-Octenyl propionate; cis-5-Octen-1-yl propionate; (Z)-5-Octen-1-yl propanoate	Green waxy fruity, with fleshy apple, pineapple and banana notes	C11 H20 O2	184.275	196109-18-9	Artificial?	#N/A	Note* -at the time of this writing, this material has been assigned an EC Flavis number, but not officially been placed on the EC Register List. The Flavis number is 09.932 Mosciano (2000) indicates the odor characteristics @ 1% as "green leafy, with woody, unripe apple and banana nuances. It has watermelon and earthy cucumber notes with slight coconut and tropical undernotes, with floral highlig…	odorant					unspecified odorant	green	waxy	fruity	fleshy	apple	pineapple	banana					1	0	1	0	0	0	0	0	1	0	0	0
1	1	1	CCCCCCCCOC(=O)CC(C)=O	achiral	octyl-acetoacetate	1	2825	2845	3382	Octyl acetoacetate		Octyl acetoacetate; Octyl 3-oxobutanoate	n-Octyl 3-oxobutanoate	Somewhat oily-waxy, fermented, fruity, caramellic	C12 H22 O3	214.301	16436-00-3	Artificial	#N/A	Somewhat oily-waxy, fermented, fruity, caramellic 4734 O O CH3	odorant					unspecified odorant	oily	waxy	fermented	fruity	caramellic							1	0	0	0	0	0	0	0	1	0	0	0
1	1	1	CCC(=O)C(O)=O	achiral	2-Oxobutyric-acid	1	2857	2877	3416	Oxobutyric acid		Oxobutyric acid; 2-Oxobutyric acid;	2-Ketobutyric acid;	Sweet, brown, creamy, caramellic, fatty nuance (see comments)	C4 H6 O3	102.089	600-18-0	Nature Identical	Beer, Black tea, Coffee	According to H.Sulser et al., (A Probable Flavoring Principle in Vegetable-Protein Hydrolysates. Journal of Food Science, 32: 611–615), freshly distiiled 2-oxobutyric acid was odorless and had only a slightly acidic taste -and only developed a characteristic seasoning (caramellic) flavor on aging due to formation of of Maple furanone (FEMA 3153) which also is formed via 2-oxobutyric acid by acid …	odorant					unspecified odorant	sweet	brown	creamy	caramellic	fatty							0	1	0	0	0	1	0	0	0	0	0	0
1	1	1	CCC1=C(O)C(=O)OC1	achiral	oxoethylbutanolide	1	2862	2882	3423	Oxoethylbutanolide		Oxoethylbutanolide; 3-ethyl-2-oxo-4-butanolide	2-Oxo-3-ethyl-4-butanolide; 4-ethyl-3-hydroxyfuran-2(5H)-one; alpha-Oxo-beta-ethyl-gamma-butyrolactone; 4-ethyldihydrofuran-2,3-dione;	Weak, slight caramellic, maple, burnt sugar	C6 H8 O3	128.126	923291-29-6	Artificial	#N/A	4-ethyl-3-hydroxyfuran-2(5H)-one is closely related to the so called "maple furanone" (5-ethyl-3-hydroxy-4-methylfuran-2(5H)-one) as well as the " caramel furanone" (4,5-dimethyl-3-hydroxyfuran-2(5H)-one) which possess characteristic caramellic notes JECFA indicates -Faint sweet non-descript aromatic aroma Possible uses include butterscotch, caramellic, curry, fruit & roasted flavors. Originally …	odorant					unspecified odorant	weak	caramellic	maple	burnt sugar								0	0	0	0	1	0	0	0	0	0	0	0
1	1	1	OC(=O)C(=O)CC1=CC=CC=C1	achiral	Phenylpyruvic-acid	1	2867	2887	3430	Oxophenylpropionic acid		Oxophenylpropionic acid; Phenylpyruvic acid	2-Oxo-3-phenylpropionic acid; 3-Phenylpyruvic acid; 3-Phenyl-2-oxopropanoic acid	Somewhat burnt, caramellic odor; creamy, dairy & sweetness taste enhancer	C9 H8 O3	164.158	156-06-9	Nature Identical	Blue cheese, Provolone cheese, Beer, White & Red wines, Cocoa, Sake	Mosciano, et al. indicate -"Odor: @ 1.0%. Sweet almond vanilla, creamy, fruity cherry like, acidic sour Swiss cheese like, clover honey with floral and coumarinic nuances. Taste: @ 20-25 PPM. Slightly creamy, cherry vanilla, powdery coumarin and coconut like with fruity honey nuances. Possible applications: Cherry, vanilla, berry flavors, honey, dairy notes for cream and cheese flavors, mint modi…	odorant + role					odor diff taste role	burned	caramellic	odor									0	0	0	0	0	0	0	0	0	0	0	0
1	1	1	CCC(=O)CC	achiral	3-Pentanone	1	2893	2913	3460	3-Pentanone		Pentanone; 3-Pentanone; Pentan-3-one		Ethereal, caramel; slight fruity cheese note	C5 H10 O	86.132	96-22-0	Nature Identical	Apple, Apple juice, Banana, Grapefruit peel oil, Guava, Grape, Pear, Pineapple, Strawberry, Cabbage(cooked), Peas, Tomato, Wheat bread, Cheddar cheese, Parmesan cheese, Butter, Milk, Fish, Chicken (heated), Beef (boiled, cooked), Pork (heated), Rum, White wine, Coffee, Black tea, Honey, Olive, Passion fruit juice (yellow), Plum, Beans, Mango, Cauliflower, Cauliflower (cooked), Brussels sprouts, P…	Boelens indicates -sharp, burnt wood, somewhat fruity odor (PMP 2001); ethereal, fruity flavor (FRM 2001). Described as a "sweet, caramel-like odor" by GC-O (Gudrun Olafsdottir, Rosa Jonsdottir, Hélène L. Lauzon, Joop Luten, and Kristberg Kristbergsson, Characterization of Volatile Compounds in Chilled Cod (Gadus morhua) Fillets by Gas Chromatography and Detection of Quality Indicators by an Elec…	odorant					unspecified odorant	ethereal	caramellic	weak	fruity	cheese							1	0	0	0	1	0	0	0	0	0	0	0
1	1	1	CCCCC(=O)C1=CC=CS1	achiral	2-Pentanoylthiophene	1	2895	2915	3462	Pentanoylthiophene		Pentanoylthiophene; 2-Pentanoylthiophene		Somewhat roasted, fried, nutty, caramellic	C9 H12 O S	168.257	53119-25-8	Nature identical	Soybean	Boelens indicates -slightly sulphurous; on dilution baked, fried, roasted character flavor (FRM 2001) Probably finds use in roasted flavors (nuts, meat, cereal, bread, etc.) 4847 H H3C O	odorant					unspecified odorant	roasted	fried	nutty	caramellic								0	0	0	0	0	0	0	0	0	0	0	0
1	1	1	OC(=O)CCC=C	achiral	4-Pentenoic-acid	1	2898	2918	3465	4-Pentenoic acid		Pentenoic acid; 4-Pentenoic acid;	Allyl acetic acid; Pent-4-enoic acid	Sour, caramellic strong cheese odor; sweet fruity-cheese taste	C5 H8 O2	100.116	591-80-0	Artificial*	Virginia Tobacco ( Does not comply with IOFi nature identical criteria)	Interchim describes the odor/flavor properties as "Cheese." Bedoukian indicates: Odor Description: A cheese-like aroma. Flavor Use: Used in butter, fruit and cheese flavors Fontarome indicates -Powerful, pungent, mustard-like odor JECFA indicates -a cheese-like odour Boelens indicates -sour, caprylic, strongly cheese-like odor (PMP 2001); sour, cheese-like aroma/flavor (FRM 2001) Burdock indicate…	odorant + taste					odor diff taste	sour	caramellic	strong	cheese	odor							0	0	0	0	0	0	0	1	0	0	0	0
1	1	1	CC\\C=C\\C(O)=O	achiral	2-Pentenoic-acid	1	2899	2919	3466	2-Pentenoic acid		Pentenoic acid; 2-Pentenoic acid; Pent-2-enoic acid		Caramellic, sour, fruity, cheese notes	C5 H8 O2	100.116	13991-37-2	Nature Identical	Banana, Beer, Chicken Fat.	The JECFA number is for (E)-2-Pentenoic acid which is generally the item of commerce. The TNO CIVO books list the CAS number as 626-98-2. 13991-37-2 is for the trans isomer. Oxford (now Frutarom) indicates: Odour Description -Cheese, Rancid, Sour Suggested Uses -Alcoholic Beverages, Cheese, Chicken, Dairy Products, Soft Fruits Mosciano indicates (for the trans isomer) -"Odor: @ 1.0%. Acidic, ripe…	odorant					unspecified odorant	caramellic	sour	fruity	cheese								1	0	0	0	0	0	0	0	0	0	0	0
1	1	1	O=C(OCCC1=CC=CC=C1)C2=CC=CO2	achiral	2-Phenethyl-2-furoate	1	2948	2968	3518	Phenethyl furoate		Phenethyl furoate; Phenethyl 2-furoate; 2-Phenethyl 2-furoate	2-Phenylethyl 2-furoate; 2-Furoic acid, 2-phenylethyl ester;	Fruity, caramellic, slight fungal odor; warm caramellic fruity taste	C13 H12 O3	216.233	7149-32-8	Artificial	Not considered Nature Identical by IOFI	Bedoukian has previously described this material as having a "honey, rose odor". Used in Honey, Mushroom, Chocolate and Vegetable flavors. JECFA indicates -Warm, fruity-caramel, slightly earthy, oily aroma Burdock indicates -a musty, mushroom odor; also described as a fruity caramellic, slightly earthy, oily odor (Fenaroli’s Handbook of Flavor Ingredients, Fifth Edition, CRC Press, 2004, p. 1528-…	odorant + taste					odor diff taste	fruity	caramellic	weak	fungal	odor							1	0	0	0	1	0	0	0	0	0	0	0
1	1	1	CCCCC(=O)OCCC1=CC=CC=C1	achiral	2-Phenethyl-valerate	1	2965	2985	3535	Phenethyl valerate		Phenethyl valerate; 2-Phenethyl valerate; Phenethyl pentanoate		Fruity, floral-rose, pineapple-apple notes; tobacco notes	C13 H18 O2	206.281	7460-74-4	Nature identical	Mentha species, Rum, Cider	Arctander indicates -W arm, fruity, rosy, herbaceous & tobacco like odor. The taste is sweet, pungent, fruity below 10 ppm. Boelens indicates -fruity, floral, aromatic odor/flavor (PMP 2001 & FRM 2001) While 2-Phenethyl isovalerate is more commonly used in flavors, this material has Sweet, fruity, pineapple, apple, green and berry notes in dilution. Used in pineapple, peach, apricot, apple, honey…	odorant					unspecified odorant	fruity	floral	rose	pineapple	apple	tobacco						1	0	0	1	0	0	0	0	0	0	0	0
1	1	1	CC(C)CC(=O)OCCCC1=CC=CC=C1	achiral	3-Phenylpropyl-isovalerate	1	3034	3055	3610	Phenylpropyl isovalerate		Phenylpropyl isovalerate; 3-Phenylpropyl isovalerate;	Hydrocinnamyl 3-methylbutanoate; Hydrocinnamyl isovalerate; 3-Phenylpropyl 3-methylbutanoate; 3-Phenylpropyl isopentanoate; 3-Phenylpropyl isovalerianate;	Fruity (strawberry-prune) odor; sweet "preserve" like taste	C14 H20 O2	220.307	5452-07-3	Artificial	Not considered Nature Identical by IOFI	Aldrich indicates -plum; raspberry; strawberry odor Fischetti (1980) describes this material as having a "fruity, melon" odor and "honey, melon, blueberry" flavor. Burdock indicates -a complex fruity, strawberry-raspberry like odor having a plum-like undertone (Fenaroli’s Handbook of Flavor Ingredients, Fifth Edition, CRC Press, 2004, p. 1573) JECFA indicates -strawberry-prune-plum-like odour Arc…	odorant + taste					odor diff taste	fruity	strawberry	prune	odor								1	0	0	0	0	0	0	0	0	0	0	0
1	1	1	C1COC(C1)CCCC2=CC=CC=C2	achiral	Phenylpropyltetrahydrofuran	1	3041	3063	3617	Phenylpropyltetrahydrofuran		Phenylpropyltetrahydrofuran;	2-(3-Phenylpropyl)-tetrahydrofuran; alpha-(3-Phenylpropyl)-tetrahydrofuran; 2-Hydrocinnamyl tetrahydrofuran;	Sweet, caramellic, honey, fruity (plum-peach) odor and taste	C13 H18 O	190.281	3208-40-0	Artificial	Not considered Nature Identical by IOFI	Fischetti (1980) indicates it as having a "sweet, burnt-sugar odor" and a "sweet, fruity" taste. Boelens indicates -aromatic, balsamic, somewhat roasted character (FRM 2001). Burdock indicates -a sweet, fruity odor with a sweet, honey-like flavor. (Fenaroli’s Handbook of Flavor Ingredients, Fifth Edition, CRC Press, 2004, p. 1576) Arctander indicates -A sweet, carameilic, fruity odor. The taste i…	odorant + taste					odor idem taste	sweet	caramellic	honey	fruity	plum	peach	odor	taste				1	1	0	0	0	0	0	0	0	0	0	0
1	1	1	CC(=C)C1CC2OC2(C)C(=O)C1	achiral	Piperitenone-oxide	1	3056	3078	3637	Piperitenone oxide		Piperitenone oxide;	1,2-Epoxy-p-menth-4(8)-en-3-one; 6-methyl-3-(propan-2-ylidene)-7-oxa-bicyclo[4.1.0]heptan-2-one; Rotundifolone; Lippione	Apple, pineapple herbaceous mint odor	C10 H14 O2	166.217	35178-55-3	Nature Identical	Mentha arvensis, Scotch Spearmint Oil, Basil species, Mentha rotundifolia, Mentha suaveolens ssp. suaveotens	The apple-or pineapple-like odor of M. rotundifolia L. is due to pure piperitenone oxide (Merritt J. Murray, The Genetic Basis for a Third Ketone Group in Mentha Spicata L., Genetics. 1960 July; 45(7): 931–937) Boelens indicates -fresh, herbaceous, slightly minty (FRM 2001) JECFA indicates -Herbaceous minty aroma JECFA specifies the (+)-enantiomer Used as a trace constituent in the reconstitution…	odorant					odor	apple	pineapple	herbaceous	minty	odor							0	0	0	0	0	0	1	0	0	0	0	0
1	1	1	CCC(=O)C1=C(C)C=CO1	achiral	2-Propionyl-3-methylfuran	1	3104	3126	3696	Propionylmethylfuran		Propionylmethylfuran; 2-Propionyl-3-methylfuran	1-(3-methyl-2-furyl)propan-1-one	Nutty, hay, roasted beany, caramel, slight coumarin odor	C8 H10 O2	138.164	23747-34-4	Artificial	#N/A	Previously assigned Flavis No. 13.187 *Note -COMMISSION DECISION of 26 February 2009 amending Decision 1999/217/EC as regards the EC register of flavouring substances: Deleted from list. In Great Britian Patent 1247829 (Sept. 29, 1971) assigned to PFW this materal is described as roast bean, sweet at 1 ppm in water. Possible uses include, nut, roasted flavors, etc. 5183 CH3 N H O	odorant					odor	nutty	hay	roasted	beany	caramellic	weak	coumarinic	odor				0	0	0	0	1	0	0	0	0	0	0	0
1	1	1	CCCOC(=O)CC(C)=O	achiral	propyl-acetoacetate	1	3111	3133	3705	Propyl acetoacetate		Propyl acetoacetate; Propyl 3-oxobutanoate		Fruity, caramellic, fermented, brandy, heavy fruit-apple notes	C7 H12 O3	144.168	1779-60-8	Artificial	#N/A	The characteristic fruity taste of propyl acetoacetate blends well in many Fruit flavors, especially Apple, Apricot, Peach, Pear as well as Rum, Brandy, Wine, Cognac and Whiskey types. Provides a background fruity note to Cherry, Raspberry, Strawberry. This material is useful in hard candy and bakery flavors which are subjected to heat in processing. Normal use levels in finished consumer product…	odorant					unspecified odorant	fruity	caramellic	fermented	brandy	heavy fruit	apple						1	0	0	0	0	0	0	0	0	0	0	0
1	1	1	CCCOC(=O)\\C=C\\C	achiral	Propyl-crotonate	1	3116	3138	3713	Propyl crotonate		Propyl crotonate; Propyl trans-but-2-enoate		Fruity, etthereal, apple, chamomille notes, slightly caramellic,	C7 H12 O2	128.169	10352-87-1	Nature Identical	Roman Chamomille	Boelens indicates -fruity, somewhat ethereal-gassy odor & flavor (PMP 2001 & FRM 2001) Used in chamomille substitutes, apple and other fruit flavors. 5208 O O CH3	odorant					unspecified odorant	fruity	ethereal	apple	chamomile	weak	caramellic						1	0	0	0	1	0	0	0	0	0	0	0
1	1	1	CCCOC(=O)CCC1CCCCC1	achiral	propyl-cyclohexanepropionate	1	3117	3139	3714	Propyl cyclohexanepropionate		Propyl cyclohexanepropionate; Propyl 3-cyclohexylpropanoate	Propyl cyclohexylpropionate	Strong, sweet, fruity, pineapple-peach, pear notes	C12 H22 O2	198.302	16595-06-5	Artificial	#N/A	Primary use is in fruit flavors. 5209 O CH3 O	odorant					unspecified odorant	strong	sweet	fruity	pineapple	peach	pear						1	1	0	0	0	0	0	1	0	0	0	0
1	1	1	CCCOC(=O)\\C=C\\C1=CC=CO1	achiral	Propyl-furanacrylate	1	3123	3145	3723	Propyl furanacrylate		Propyl furanacrylate; Propyl 3-(2-furyl)-2-propenate;	Propyl 3-(2-furyl)-acrylate; 3-(2-furyl)-acrylic acid, propyl ester; 3-(2-furyl)-2-propenoic acid, propyl ester;	Sweet, fruity, spicy, strawberry-apple-pear, honey, tropical	C10 H12 O3	180.2	623-22-3	Artificial	Not considered Nature Identical by IOFI	Mosciano, et. al. (1993), have described the organoleptic properties as follows: Odor as "Sweet, spicy, fruity and balsamic with a citrus-like nuance" and taste as "Fruity, sweet, spicy, honey and tropical" at 25 ppm. (Perfumer & Flavorist, Vol.18, July/August 1993, P. 53) Fischetti (1980) describes the odor and taste as "fruity, woody, pineapple" at 25 ppm. JECFA indicates -Light strawberry, pea…	odorant					unspecified odorant	sweet	fruity	spicy	strawberry	apple	pear	honey	tropical fruit				1	1	0	0	0	0	0	0	0	0	0	0
1	1	1	CCCCCC(=O)OCCC	achiral	Propyl-hexanoate	1	3126	3148	3727	Propyl hexanoate		Propyl hexanoate; Propyl caproate;	Hexanoic acid, propyl ester;	Sweet, pineapple, green, tropical odor; pineapple tropical green taste	C9 H18 O2	158.238	626-77-7	Nature Identical	Apple, Grape, Grape Brandy, Passion Fruit, Plum, Rum, Whiskey, Wine.	Mosciano, et. al. (1992), have described the organoleptic properties as follows: Odor as "Sweet, fruity, juicy, pineapple, green and tropical" and taste as "Pineapple, fruity, sweet, tropical, fresh green and juicy" at 50 ppm. (Perfumer & Flavorist, Vol. 17, November/December1992, p. 43) Oxford (now Frutarom) indicates: Odour Description -Fresh, Fruity, Green, Pineapple, Sweet Suggested Uses -Alc…	odorant + taste					odor diff taste	sweet	pineapple	green	tropical fruit	odor							0	1	1	0	0	0	0	0	0	0	0	0
1	1	1	CCCOC(=O)C(C)C	achiral	Propyl-2-methylpropionate	1	3128	3150	3731	Propyl isobutyrate		Propyl isobutyrate; Propyl 2-methylpropionate;	2-Methylpropanoic acid, propyl ester; n-Propyl isobutanoate;	Fruity, tropical, pineapple odor; sweet, ripe tropical fruity taste	C7 H14 O2	130.185	644-49-5	Nature Identical	Apple, Honey, Hop Oil, Olive.	Mosciano (2001) indicates: Odor: @ 1.0% -Sweet, estry, ripe fruity, with tropical and juicy notes. It has melon, berry and red fruit nuances. Taste: @ 5-15 ppm -Sweet, fruity, with ripe tropical, tutti frutti and citrus melon nuances. Potential Applications: Orange and tangerine juicy notes, tropical fruits such as mango and guava, pineapple, juicy fruit and tutti frutti nuances, grape, cherry an…	odorant + taste					odor diff taste	fruity	tropical fruit	pineapple	odor								1	0	0	0	0	0	0	0	0	0	0	0
1	1	1	CCCOC(=O)CCC(C)C	achiral	propyl-isohexanoate	1	3129	3151	3732	Propyl isohexanoate		Propyl isohexanoate; Propyl 4-methylpentanoate		Fruity, pineapple-apple notes	C9 H18 O2	158.238	25415-68-3	Artificial	#N/A	Primary use is in fruit flavors. 5234 O CH3 H3C O CH3	odorant					unspecified odorant	fruity	pineapple	apple									1	0	0	0	0	0	0	0	0	0	0	0
1	1	1	CCCOC(=O)C(C)O	achiral	Propyl-lactate	1	3131	3153	3734	Propyl lactate		Propyl lactate; Propyl 2-hydroxypropionate		Light, sweet, milky, caramellic odor; sweet, milk-like taste	C6 H12 O3	132.158	616-09-1	Nature Identical	Parmesan cheese, Rum, White & Red wines, Cherimoya	Boelens indicates -fruity, burnt, somewhat caramellic odor/flavor Possibly used in Milk, Butter, Butterscotch, Caramel, Chocolate, Coconut, Toffee, Yogurt, Cheese and as a modifier in Fruit flavors. 5237 O CH3 O H3C O	odorant + taste					odor diff taste	weak	sweet	milky	caramellic	odor							0	1	0	0	1	0	0	0	0	0	0	0
1	1	1	CCCOC(=O)CCC(C)=O	achiral	propyl-levulinate	1	3132	3154	3735	Propyl levulinate		Propyl levulinate; Propyl 4-oxopentanoate		Sweet, slight fruity, caramellic	C8 H14 O3	158.195	645-67-0	Artificial	#N/A	For isopropyl levulinate, Boelens indicates -fruity, character of boiled red beans, melon and banana (FRM 2001) JECFA indicates -Sweet very slight carmellic aroma Possible uses are primarily in fruit & caramellic flavors. Normal use levels in finished products: Baked goods, alcoholic beverages, Frozen dairy, Gelatins/Puddings (5/10 ppm); Soft candy (3/10 ppm); non-alcoholic beverages (1/3 ppm). (…	odorant					unspecified odorant	sweet	weak	fruity	caramellic								1	1	0	0	1	0	0	0	0	0	0	0
1	1	1	CCCOC(=O)C(C)S	achiral	propyl-mercaptopropionate	1	3133	3155	3736	Propyl mercaptopropionate		Propyl mercaptopropionate; Propyl 2-mercaptopropionate	Propyl 2-sulfanylpropanoate	Fruity, tropical, overripe, strawberry in dilution; meaty at higher levels	C6 H12 O2 S	148.224	19788-50-2	Artificial	Not considered Nature Identical by IOFI	Note* -at the time of this writing, this material has been assigned an EC Flavis number, but not officially been placed on the EC Register List. The Flavis number is 12.267 This material is the subject of United States Patent Application 20040052914 by Fitz, et al. (March 18, 2004) (Quest). Evaluation at 0.1 ppm water: fruity, tropical, overripe, strawberry At higher concentrations it is sulfurou…	odorant					unspecified odorant	fruity	tropical fruit	overripe	strawberry	meaty							1	0	0	0	0	0	0	0	0	0	0	0
1	1	1	CCCOC(=O)C(C)CC	achiral	Propyl-2-methylbutyrate	1	3135	3157	3739	Propyl methylbutyrate		Propyl methylbutyrate; Propyl 2-methylbutyrate		Fruity, sweet, apple, pineapple, green, tutti frutti notes	C8 H16 O2	144.211	37064-20-3	Nature identical	Apple, Apple juice, Starfruit, Durian, Melon, Apricot, Scotch Spearmint, Hops, Cantaloupe	Boelens indicates -strongly fruity, apple-like odor & flavor (PMP 2001 & FRM 2001) Propyl 2-methylbutanoate is important in apple aroma (Kollmannsberger, H.; Berger, R. G. Precursor atmosphere storage induced flavour changes in apples cv. Red Delicious. Chem. Mikrobiol. Technol. Lebensm. 1992, 14, 81-86) Described as "sweet, fruity" by GC-O (Martin Steinhaus and Peter Schieberle, Comparison of th…	odorant					unspecified odorant	fruity	sweet	apple	pineapple	green	tutti frutti						1	1	1	0	0	0	0	0	0	0	0	0
1	1	1	CCCOC(=O)C(C)=O	achiral	propyl-pyruvate	1	3144	3166	3750	Propyl pyruvate		Propyl pyruvate; Propyl 2-oxopropanoate		Fruity, caramellic, burnt	C6 H10 O3	130.142	20279-43-0	Artificial	#N/A	JECFA indicates -Sweet caramellic, floral aroma Potentially used in Dairy, Maple, Rum, Butterscotch, Fruit flavors Normal use levels in finished products: Baked goods, Cheese, Fats/Oils, Milk products, Snack foods (1/5 ppm). (Average/Maximum) See FEMA GRAS list No. 24. Summary of Evaluations Performed by the Joint FAO/WHO Expert Committee on Food Additives: 73rd meeting of the Joint FAO/WHO Exper…	odorant					unspecified odorant	fruity	caramellic	burned									1	0	0	0	0	0	0	0	0	0	0	0
1	1	1	CCCOC(=O)/C=C/C=C/C	achiral	propyl-sorbate	1	3146	3168	3752	Propyl sorbate		Propyl sorbate; Propyl (E,E)-2,4-hexadienoate	Propyl (2E,4E)-hexa-2,4-dienoate	Fresh, green, fruity tropical, pineapple	C9 H14 O2	154.206	10297-72-0	Artificial	#N/A	Used in tropical fruit & beverage formulations. Normal use levels in finished products: non-alcoholic beverages (1/5 ppm); Chewing gum (20/100 ppm); Hard candy (5/25 ppm). (Average/Maximum) See FEMA GRAS list No. 24. Summary of Evaluations Performed by the Joint FAO/WHO Expert Committee on Food Additives: 76th meeting of the Joint FAO/WHO Expert Committee on Food Additives (JECFA) held in Geneva,…	odorant					unspecified odorant	fresh	green	tropical fruit	pineapple								0	0	1	0	0	0	0	0	0	0	0	0
1	1	1	CCCCC(=O)OCCC	achiral	Propyl-pentanoate	1	3148	3170	3754	Propyl valerate		Propyl valerate; Propyl valerianate; Propyl pentanoate;		Fruity-ethereal, apple-pineapple, wine like in dilution	C8 H16 O2	144.211	141-06-0	Nature identical	Apple, Kumquat peel oil, Vanilla, Cheese	Oxford (now Frutarom) indicates: Odour Description -Fruity, Pineapple Suggested Uses -Apple, Hard Fruits, Pineapple Arctander indicates -strong, relatively diffusive, ethereal, fruity (apple & pineapple) odor. The taste is sweet, fruity, wine & apple below 50 ppm. This material is reported by Arctander as not quite as pineapple like as Propyl isovalerate. The Good Scents Co. indicates -ethereal f…	odorant					unspecified odorant	fruity	ethereal	apple	pineapple	winey							1	0	0	0	0	0	0	0	0	0	0	0
1	1	1	CCCC1NCCS1	achiral	2-Propylthiazolidine	1	3170	3197	3787	Propylthiazolidine		Propylthiazolidine; 2-Propylthiazolidine		Pungent green, radish, slightly caramellic, bready	C6 H13 N S	131.24	24050-10-0	Nature identical	Butter (heated)	In U.S. Patent 3,944,561 to Dubs , et al. March 16, 1976 assigned to Givaudan Corporation the following description is given: Odour: pungent, pyridine-like, harsh radish-like, slightly metallic. Flavour: pungent green, slightly caramellous note, towards bread. Vernin (1982) indicates that 2-propylthiazolidine (as well as the corresponding 2-isopropyl-and 2-n-butyl-analogs) when mixed with pyrazin…	odorant	erreur formule et MW sur tableau excel FB9 et fiche FB9 (mais OK sur image squelette et pour pdf) ; vraies valeurs C6 H13 N S et 131.243	erreur formule et MW sur tableau excel FB9 et fiche FB9 (mais OK sur image squelette et pour pdf) ; vraies valeurs C6 H13 N S et 131.243	erreur formule et MW sur tableau excel FB9 et fiche FB10 (mais OK sur image squelette et pour pdf) ; vraies valeurs C6 H13 N S et 131.243		unspecified odorant	pungent	green	radish	weak	caramellic	bread						0	0	1	0	1	0	0	0	0	0	0	0
1	1	1	CC1OC(=O)C(=C1C)O	achiral	Sotolon	1	3224	3251	3880	Sotolon		Sotolon; Caramel furanone; 4,5-Dimethyl-3-hydroxy-2(5H)-furanone	4,5-Dimethyl-3-hydroxy-2,5-dihydrofuran-2-one; 2,3-Dimethyl-4-hydroxy-4,5-dihydrofuran-5-one; Dimethyl oxyfurone (GIV.); Sugar lactone; Fenugreek lactone	Powerful caramel aroma; sweet burnt taste	C6 H8 O3	128.126	28664-35-9	Nature Identical	Fenugreek Seed, Roasted Virginia Tobacco, Sake, Sugar, Botrytized grape wine, Rice wine, Sherry wine	Odor threshold in water: 0.001 ppb. For a 1% solution of Sotolon, Givaudan indicates: Organoleptic character -Extremely Strong, Fenugreek, Lovage, Maggi-Like Description -A strong chemical with a soupy character. On dilution it is useful in many fruit flavours. Recommended flavour usage -Sherry, Fenugreek, Sake, Beef Broth, Soup, Seasoning Recommended use level -0.5 ppm Mosciano indicates -Odor: …	odorant + taste					aroma diff taste	strong	caramellic	aroma									0	0	0	0	0	0	0	1	0	0	0	0
1	1	1	CC1OC(=C(O)C1=O)C	achiral	Furaneol	1	3227	3255	3885	Strawberry furanone		Strawberry furanone; Furaneol® (Firmenich)	2,5-Dimethyl-4-hydroxy-3(2H)-furanone; 2,5-dimethyl-4-hydroxy-2,3-dihydrofuran-3-one; Pineapple furanone;	Fruity, caramelized pineapple-strawberry odor & taste; roasted	C6 H8 O3	128.126	3658-77-3	Nature Identical	Coffee, Fermented Soy Sauce, Grape, Guava, Malt, Pineapple, Raspberry, Roasted Almond, Roasted Filbert, Roasted Virginia Tobacco, Strawberry.	Odor threshold in water: 60 ppb at pH 7, 31 ppb at pH 4.5 and 21 ppb at pH 3.0 (Buttery, et. al., 1995). Firmenich indicates: Nice caramelic, fruity and cotton candy notes. FURANEOL® is a powerful and indispensable material for strawberry, chocolate, pineapple, jammy, praline and meat flavors. Recommended dosage in final application up to 30 ppm Mosciano, et. al. (1993), have described the organo…	odorant + taste					odor idem taste	fruity	caramelized pineapple	caramelized strawberry	odor	taste	roasted						1	0	0	0	0	0	0	0	0	0	0	0
1	1	1	OCC1CCCO1	achiral	Tetrahydrofurfuryl-alcohol	1	3281	3308	3955	Tetrahydrofurfuryl alcohol		Tetrahydrofurfuryl alcohol;	Tetrahydro-2-furancarbinol; Tetrahydro-2-furanmethanol; Tetrahydro-2-furylmethanol;	Weak, solvent-cauliflower, fruity, oily, caramellic odor; nut taste	C5 H10 O2	102.132	97-99-4	Nature Identical	Fermented Soy Sauce, Virginia Tobacco.	Boelens indicates -"herbal vegetable, somewhat cauliflower-like (FRM 2001). Fischetti (1980) indicates a pleasant, fruity, solventy odor and a residual nut like taste. Burdock indicates: A weak, warm, caramellic, oily odor. A coffee & nut-like flavor at 0.03 -1 ppm. (Fenaroli’s Handbook of Flavor Ingredients, Fifth Edition, CRC Press, 2004, p. 1777-1778) The Good Scents Co. describes this as: veg…	odorant + taste					odor diff taste	weak	solvent	cauliflower	fruity	oily	caramellic	odor					1	0	0	0	1	0	0	0	0	0	0	0
1	1	1	CCCC(=O)OCC1CCCO1	achiral	Tetrahydrofurfuryl-butyrate	1	3282	3309	3956	Tetrahydrofurfuryl butyrate		Tetrahydrofurfuryl butyrate;	Tetrahydro-2-furylmethyl n-Butanoate; Tetrahydrofurfuryl butanoate;	Mild, heavy, sweet, fruity (Apricot-Pineapple-Tropical) odor and taste	C9 H16 O3	172.222	2217-33-6	Artificial	Not considered Nature Identical by IOFI	Oxford (now Frutarom) indicates: Odour Description -Fruity, Heavy, Musty, Sweet, Tropical Suggested Uses -Alcoholic Beverages, Apricot, Bakery, Cheese, Cherry, Dairy Products, Peach, Pineapple, Soft Fruits, Tropical Fruits Mosciano et al. indicate -"Odor: @ 1.0%. Dry fruity pineapple banana, green vegetative, slightly musty and earthy with tropical fruit nuances.Taste: @ 10 ppm. Berry strawberry,…	odorant + taste					odor idem taste	mild	heavy	sweet	fruity	apricot	pineapple	tropical fruit	odor	taste			1	1	0	0	0	0	0	0	0	0	1	0
1	1	1	CCC(=O)OCC1CCCO1	achiral	Tetrahydrofurfuryl-propionate	1	3286	3313	3960	Tetrahydrofurfuryl propionate		Tetrahydrofurfuryl propionate;	2-Tetrahydrofurylmethyl propionate; Tetrahydrofurfuryl propanoate;	Sweet, caramellic, fruity, fermented odor; fruity-rum-nut taste	C8 H14 O3	158.195	637-65-0	Artificial	Not considered Nature Identical by IOFI	Bedoukian indicates: Odor Description: A nutty, banana odor Flavor Use: Used in banana nut, banana flavors and cordials. Oxford (now Frutarom) indicates: Odour Description -Fruity, Musty, Nutty, Sweet Suggested Uses -Apricot, Banana, Chocolate, Herbal Flavours, Soft Fruits Mosciano, et.al. (1998) describe the Odor Characteristics as "Musty, nutty, fruity, fermented, fatty with a banana nuance" an…	odorant + taste					odor diff taste	sweet	caramellic	fruity	fermented	odor							1	1	0	0	0	0	0	0	0	0	0	0
1	1	1	SC1=CC=CS1	achiral	2-Thienyl-mercaptan	1	3309	3338	3995	Thienylmercaptan		Thienylmercaptan; 2-Thienyl mercaptan;	2-Mercaptothiophene; 2-Thienylthiol; 2-Thiophenethiol; thiophene-2-thiol;	Sulfurous, caramellic, roasted coffee, burnt, used in fried meat flavors	C4 H4 S2	116.207	7774-74-5	Artificial	Not considered Nature Identical by IOFI.	Givaudan indicates -Sulphurous, Roasted; This chemical is effective as a typical fried note and is used in many fried meat flavourings. Recommended application -coffee, fried meat Recommended use level 1 -10 ppm Fischetti (1980) describes the odor as "burnt rubber, roasted coffee" and the taste as "burnt or roasted". Burdock indicates: a very unpleasant, burnt-caramellic, sulfuraceous odor with a…	odorant + role					unspecified diff flavor role	sulfuraceous	caramellic	roasted coffee	burned								0	0	0	0	0	0	0	0	0	0	0	1
1	1	1	CCOC(=O)C(C)C=CC	achiral	ethyl-2-methyl-3-pentenoate	1	10001	3539	1376	Ethyl 2-methyl-3-pentenoate		Ethyl methylpentenoate; Ethyl 2-methyl-3-pentenoate;		Sweet, fruity, pineapple, strawberry, melon-green taste at 1 ppm	C8 H14 O2	142.196	1617-23-8	Artificial	Not considered Nature Identical by IOFI	Mosciano, et. al. report that (a mixture of Ethyl 2-methyl-3-pentenoate plus Ethyl 2-methyl-4-pentenoate) has a "fruity, green, cooling, sweet and pungent" odor and a "fruity, green, sweet, berry, and melon" taste at 30 ppm. Vol. 15, September/October 1990, p. 49) Mosciano also indicates -Sweet estry, fresh & juicy fruity, green & slightly pungent with apple, pear. banana and pineapple and tutti …	taste only odor and taste				modifié par rapport à la publi Flavor-Base ; molécule à ajouter	odor and taste, trigeminal, odorless	sweet	fruity	pineapple	strawberry								1	1	0	0	0	0	0	0	0	0	0	0
																																						195	96	53	9	32	18	6	22	16	4	6	9
[truncated: 247 more columns]

## Sheet: listes odors
liste odor Burt	test liste StCaPi		test liste Burt	liste StCaPi	n° liste StCapi
strawberry	1		0	weak	#VALUE!
caramellic	1		0	strong	#VALUE!
pineapple	1		0	mild	#VALUE!
fruity	1		0	sugar	#VALUE!
sweet	1		0	pleasant	#VALUE!
apple	1		0	bland	#VALUE!
green	1		0	prune	#VALUE!
tropical fruit	1		1	strawberry	1
winey	1		1	caramellic	2
pear	1		1	pineapple	3
buttery	1		1	fruity	4
nutty	1		1	sweet	5
banana	1		1	apple	6
fatty	1		1	green	7
burned	1		1	tropical fruit	8
spicy	1		1	winey	9
waxy	1		1	pear	10
rum	1		1	buttery	11
berry	1		1	nutty	12
ethereal	1		1	banana	13
fermented	1		1	fatty	14
roasted	1		1	burned	15
oily	1		1	waxy	16
fresh	1		1	spicy	17
maple	1		1	berry	18
bread	1		1	rum	19
cheese	1		1	ethereal	20
sulfuraceous	1		1	fermented	21
floral	1		1	oily	22
creamy	1		1	roasted	23
apricot	1		1	floral	24
peach	1		1	sulfuraceous	25
burnt sugar	1		1	fresh	26
chamomile	1		1	cheese	27
milky	1		1	bread	28
sharp	1		1	maple	29
cognac	1		1	creamy	30
honey	1		1	peach	31
herbaceous	1		1	apricot	32
juicy	1		1	herbaceous	33
sour	1		1	honey	34
dairy	1		1	cognac	35
meaty	1		1	sharp	36
rose	1		1	milky	37
plum	1		1	chamomile	38
brandy	1		1	burnt sugar	39
coumarinic	1		1	rose	40
coconut	1		1	meaty	41
coffee	1		1	dairy	42
green fruity	1		1	sour	43
melon	1		1	juicy	44
woody	1		1	woody	45
acidic	1		1	melon	46
mixed fruit	1		1	green fruity	47
cereal	1		1	coffee	48
galbanum	1		1	coconut	49
harsh	1		1	coumarinic	50
brown	1		1	brandy	51
heavy fruit	1		1	plum	52
ketonic	1		1	earthy	53
hay	1		1	pungent	54
savory	1		1	onion	55
herbal	1		1	herbal	56
onion	1		1	savory	57
pungent	1		1	hay	58
earthy	1		1	ketonic	59
chemical	1		1	heavy fruit	60
lactonic	1		1	brown	61
green apple	1		1	harsh	62
almond	1		1	cereal	63
heavy	1		1	mixed fruit	64
tobacco	1		1	acidic	65
cocoa	1		1	balsamic	66
musty	1		1	minty	67
minty	1		1	musty	68
balsamic	1		1	cocoa	69
beany	1		1	tobacco	70
fried	1		1	heavy	71
lovage	1		1	almond	72
unripe fruit	1		1	green apple	73
mango	1		1	lactonic	74
rooty	0		1	galbanum	75
wasabi	1		1	chemical	76
neroli	1		1	vegetative	77
jam	1		1	vanilla	78
passion fruit	1		1	alcoholic	79
diffusive	1		1	alliaceous	80
yeasty	1		1	mushroom	81
estery	1		1	animalic	82
potato	1		1	smoky	83
green tropical fruit	1		1	warm	84
raspberry	1		1	orange	85
cinnamon	1		1	roasted meat	86
radish	1		1	malty	87
popcorn	1		1	sulfury	88
leather	1		1	solvent	89
bitter almond	1		1	metallic	90
grassy	1		1	bitter almond	91
metallic	1		1	grassy	92
solvent	1		1	leather	93
sulfury	1		1	popcorn	94
malty	1		1	cinnamon	95
roasted meat	1		1	radish	96
orange	1		1	raspberry	97
warm	1		1	potato	98
smoky	1		1	green tropical fruit	99
animalic	1		1	estery	100
mushroom	1		1	diffusive	101
alliaceous	1		1	yeasty	102
alcoholic	1		1	jam	103
vanilla	1		1	passion fruit	104
vegetative	1		1	neroli	105
			1	wasabi	106
			1	mango	107
			1	unripe fruit	108
			1	fried	109
			1	lovage	110
			1	beany	111

## Sheet: Table S1 StCaPi list
Table S1. List of the 293 odorants in the StCaPi-set and their odor notes.*					* In bold: "fruity" molecules
No	Odorant name	cas_no	nature	subset odor	Odor notes
1	Acetol	116-09-6	Nature Identical	s-CAR	caramellic; sweet; green; winey
2	Acetonyl acetate	592-20-1	Nature identical	s-CAR	caramellic; fruity; buttery; fermented; sour
3	Acetylcyclopentanone	1670-46-8	Nature identical	s-CAR	caramellic; fruity; burned; ketonic
4	2-Acetyl-3,5-dimethylfuran	22940-86-9	Nature identical	s-CAR	caramellic; nutty; roasted; balsamic
5	Acetylmethylfuran	1193-79-9	Nature Identical	s-CAR	caramellic; nutty; coumarinic; hay
6	Acetylmethylpyrimidine	67860-38-2	Nature Identical	s-CAR	caramellic; roasted; meaty; animalic
7	2-Acetyl-3,4,5,6-tetrahydropyridine	27300-27-2	Nature Identical	s-CAR	caramellic; bread; popcorn
8	Allyl Thiohexanoate	156420-69-8	Artificial	s-PNA	pineapple; tropical fruit
9	Allyl butanoate	2051-78-7	Artificial*	s-PNA	pineapple; fruity; apple; green; apricot
10	Allyl cyclohexanebutyrate	7493-65-4	Artificial	s-PNA/t-PNA	pineapple; fruity; sweet
11	Allyl cyclohexanepropionate	2705-87-5	Artificial	s-PNA	pineapple; fruity; sweet
12	Allyl cyclohexyloxyacetate	68901-15-5	Artificial	s-PNA	pineapple; fruity; green; galbanum
13	Allyl cyclohexyloxypropionate	68901-15-5	Artificial	s-PNA	pineapple; fruity; green; herbal
14	Allyl furoate	4208-49-5	Nature Identical	s-CAR	caramellic; fruity; coffee
15	Allyl heptanoate	142-19-8	Artificial*	s-PNA	pineapple; fruity; sweet; apple; banana
16	Allyl hexanoate	123-68-2	Nature Identical	s-PNA/EXP	pineapple; fruity; winey; fatty
17	Allyl ionone	79-78-7	Artificial	s-PNA	pineapple; fruity; sweet; berry; woody
18	Allyl isoamyloxyacetate	67634-00-8	Nature Identical?	s-PNA	pineapple; fruity; apple; green; herbaceous; galbanum
19	Allyl isohexanoate		Artificial	s-PNA	pineapple; fruity; apple; fatty
20	Allyl methylbutyrate	93963-13-4	Artificial	s-PNA	pineapple; fruity; sweet; waxy; fermented; oily; green tropical fruit
21	Allyl methylthiopropionate		Artificial	s-PNA	pineapple; tropical fruit
22	Allyl nonanoate	7493-72-3	Artificial	s-PNA	pineapple; fruity; winey; nutty; fatty; cognac
23	Allyl octanoate	4230-97-1	Artificial*	s-PNA	pineapple; fruity; apple; winey; banana; fatty
24	Allyl pentanoate	6321-45-5	Artificial	s-PNA	pineapple; fruity; apple; winey; fermented
25	Allyl phenoxyacetate	7493-74-5	Artificial	s-PNA	pineapple; fruity; sweet; honey
26	Allyl phenylacetate	1797-74-6	Artificial	s-PNA	pineapple; sweet; honey
27	Allyl sorbate	7493-75-6	Artificial	s-PNA	pineapple; fruity; sweet; sharp; melon
28	Allyl undecenoate	7493-76-7	Artificial	s-PNA	pineapple; sweet; nutty; fatty; coconut
29	Amyl furoate	1334-82-3	Artificial	s-CAR	caramellic; fruity; sweet; winey; fermented; herbaceous
30	Amyl hexanoate	540-07-8	Nature Identical	s-PNA	pineapple; fruity; apple; green; pear; waxy
31	Amyl keto dioxane	65504-96-3	Artificial	s-CAR	caramellic; fruity; winey; buttery; peach; lactonic
32	Amyl lactate	6382-06-5	Nature Identical	s-CAR	caramellic; fruity; milky
33	Amyl levulinate	20279-49-6	Nature Identical	s-CAR	caramellic; fruity; winey; oily
34	Amyl propionate	624-54-4	Nature identical	s-PNA	pineapple; fruity; sweet; apple; tropical fruit; banana; mixed fruit
35	Angelic acid	565-63-9	Nature identical	s-CAR	caramellic; spicy
36	Benzyl disulfide	150-60-7	Nature Identical	s-CAR	caramellic; green; burned; sulfuraceous; earthy; harsh
37	Benzyl hexanoate	6938-45-0	Nature Identical	s-PNA	pineapple; fruity; sweet; green; tropical fruit; floral; peach; apricot
38	Benzyl lactate	2051-96-9	Artificial	s-CAR	caramellic; fruity; sweet; dairy
39	Benzyl levulinate	6939-75-9	Artificial	s-CAR/t-CAR	caramellic; fruity; sweet
40	Butenoic acid	3724-65-0	Nature Identical	s-CAR	caramellic; spicy; sharp; sour; acidic
41	n-Butyl acetate	123-86-4	Nature Identical	s-PNA	pineapple; fruity; sweet; pear; banana
42	tert-Butyl acetoacetate	1694-31-1	Artificial	s-CAR	caramellic; fermented; brandy; heavy fruit
43	Butyl angelate	7785-64-0	Nature Identical	s-CAR	caramellic; fruity; sweet; winey; floral; chamomile; herbal
44	sec-Butyl butyrate	819-97-6	Nature Identical	s-PNA	pineapple; fruity; sweet; apple; pear; banana; rum; apricot
45	Butyl crotonate	591-63-9	Nature Identical	s-PNA	pineapple; fruity; apple; green; rum; cognac; herbal
46	Butyl butyrate	109-21-7	Nature Identical	s-PNA	pineapple; fruity; sweet; apple; pear; banana
47	Butyl butyrylglycolate	94022-04-5	Artificial	s-CAR	caramellic; fruity; fatty; creamy; dairy
48	Butyl caproate	626-82-4	Nature Identical	s-PNA	pineapple; fruity; green; waxy; berry; fermented; juicy
49	n-Butyl 2-hydroxypropanoate	138-22-7	Nature Identical	s-CAR	caramellic; sweet; buttery
50	sec-Butyl lactate	18449-60-0	Nature Identical	s-CAR	caramellic; fruity; sweet; buttery; dairy
51	Butyl levulinate	2052-15-5	Artificial	s-CAR	caramellic; fruity; sweet; fatty; waxy; savory
52	Butyl methylbutyrate	15706-73-7	Nature Identical	s-PNA	pineapple; fruity; apple; tropical fruit
53	Butyl methylcrotonate		Nature identical	s-CAR	caramellic; fruity; sweet; herbaceous; chamomile
54	Butylketodioxane	65504-45-2	Artificial	s-CAR	caramellic; fruity; winey; peach
55	Cinnamyl isobutyrate	103-59-3	Nature Identical	s-PNA	pineapple; apple; banana; plum
56	Citronellyl hexanoate	10580-25-3	Nature Identical	s-PNA	pineapple; fruity; apple; pear; floral; rose
57	Crotonic acid	107-93-7	Nature identical	s-CAR	caramellic; burned; spicy; sharp; acidic
58	Cyclohexaneacetic acid	5292-21-7	Artificial	s-CAR	caramellic; buttery; waxy; cheese; honey
59	Cyclohexyl acetoacetate	6947-02-0	Artificial	s-CAR	caramellic; fruity; sweet
60	Cyclohexyl caproate	6243-10-3	Artificial	s-PNA	pineapple; fruity; winey; metallic
61	Cyclohexyl propionate	6222-35-1	Artificial	s-PNA	pineapple; fruity; sweet; green; banana; waxy
62	Cyclotene acetate	1196-22-1	Artificial	s-CAR/t-CAR	caramellic; fruity
63	Cyclotene isobutyrate	68084-07-?	Artificial	s-CAR	caramellic; fruity; buttery; nutty
64	Cyclotene propionate	87-55-8	Artificial	s-CAR	caramellic; buttery; nutty
65	epsilon-Decalactone	5579-78-2	Artificial	s-CAR	caramellic; fruity; nutty; milky; coconut
66	9-Decen-2-one	35194-30-0	Nature Identical	s-PNA	pineapple; fruity; apple; green; pear; fatty
67	Decyl acetate	112-17-4	Nature Identical	s-PNA	pineapple; fruity; fatty; rose; orange
68	Decyl hexanoate	52363-43-6	Nature Identical	s-PNA	pineapple; fruity; fatty; oily
69	Dihydrodihydroxymethylpyranone	28564-83-2	Nature Identical	s-CAR/t-CAR	caramellic
70	3,4-Dimethyl-1,2-cyclopentadione	13494-06-9	Nature Identical	s-CAR	caramellic; maple; burnt sugar
71	3,5-Dimethyl-1,2-cyclopentadione	13494-07-0	Nature Identical	s-CAR	caramellic; nutty; maple
72	Dimethylcyclopentenone	30434-64-1	Nature identical	s-CAR	caramellic; burned; ketonic
73	Dimethylethoxyfuranone	65330-49-6	Nature identical	STR-CAR	strawberry; caramellic; fruity; sweet; berry; roasted
74	Dimethylfuranone	14400-67-0	Nature Identical	s-CAR	caramellic; sweet; buttery; roasted; bread; burnt sugar; coffee
75	Dimethylmethoxyfuranone	4077-47-8	Nature Identical	s-CAR	caramellic; fruity; sweet; winey
76	2,3-Dimethylpyrazine	5910-89-4	Nature Identical	s-CAR	caramellic; green; nutty; meaty; coffee; cocoa; potato
77	2-Ethoxy-6-methylpyrazine	53163-97-6	Artificial	s-PNA	pineapple; fresh
78	Ethyl acetoxymethylbutyrate	139564-43-5	Nature Identical	s-PNA	pineapple; fruity; apple; tropical fruit
79	Ethyl acetoxypropionate	2985-28-6	Nature Identical	s-CAR	caramellic; fruity; rum; dairy
80	Ethyl acetylbutyrate	607-97-6	Artificial	s-CAR	caramellic; fruity; sweet; heavy
81	Ethyl acetylcinnamate	620-80-4	Artificial	s-CAR	caramellic; fruity; spicy
82	Ethyl aconitate	1321-30-8	Artificial	s-CAR	caramellic; fruity; sweet; winey; rum
83	Ethyl crotonate	623-70-1	Nature Identical	s-CAR	caramellic; fruity; rum; cognac; pungent
84	Ethyl butyrate	105-54-4	Nature Identical	s-PNA	pineapple; fruity; buttery; banana; ethereal; juicy
85	Ethyl cyclohexanepropionate	10094-36-7	Artificial	s-PNA/t-PNA	pineapple; fruity; sweet
86	Ethyl cis-4-decenoate	7367-84-2	Nature Identical	STR-PNA	strawberry; pineapple; fruity; pear; floral; peach
87	Ethyl trans-4-decenoate	76649-16-6	Nature Identical	s-PNA	pineapple; apple; green; pear; fatty; waxy
88	Ethyl dioxohexanoate	13246-52-1	Artificial	s-CAR	caramellic; fruity; floral; burnt sugar; lactonic
89	Ethyl ethoxycrotonate	57592-45-7	Artificial	s-CAR	caramellic; fruity; apple; chamomile
90	Ethyl furylpropanoate	10031-90-0	Nature Identical	s-PNA	pineapple; fruity; green; chamomile; woody; unripe fruit
91	Ethyl hexanoate	123-66-0	Nature Identical	STR-PNA	strawberry; pineapple; fruity; tropical fruit; pear; banana
92	Ethyl 5-hexenoate	54653-25-7	Nature Identical	s-PNA	pineapple; fruity; sweet; apple; green; juicy
93	Ethyl cis-3-hexenoate	64187-83-3	Nature Identical*	s-PNA	pineapple; fruity; sweet; apple; green; tropical fruit; pear; fresh
94	Ethyl 2-hydroxy-2-methylbutyrate	77-70-3	Nature Identical	s-CAR	caramellic; fruity; nutty
95	Ethyl 5-hydroxyoctanoate	75587-05-2	Nature Identical	s-PNA	pineapple; fatty
96	Ethyl isobutyrate	97-62-1	Nature Identical	EXP	fruity; sweet; apple; rum; ethereal
97	Ethyl isohexanoate	25415-67-2	Nature Identical	s-PNA	pineapple; fruity; apple
98	Ethyl levulinate propylene glycol ketal	57197-36-1	Artificial	s-CAR	caramellic; fruity
99	Ethyl levulinate	539-88-8	Nature Identical	s-CAR	caramellic; fruity; sweet; apple; green; tropical fruit
100	Ethyl maltol butyrate	93805-72-2	Artificial	s-CAR	caramellic; fruity; berry
101	Ethyl maltol isobutyrate	852997-28-5	Artificial	STR-CAR	strawberry; caramellic; sweet; tropical fruit
102	Ethyl maltol propionate		Artificial	STR-CAR	strawberry; caramellic; fruity
103	Ethyl maltol	4940-11-8	Artificial	s-CAR/t-CAR/EXP	caramellic; fruity; sweet
104	Ethyl methylbutyrate	7452-79-1	Nature Identical	s-STR/t-STR	strawberry; fruity; apple; green
105	Ethyl methyldithiopropionate	23747-43-5	Nature Identical	s-PNA	pineapple; fruity; green; tropical fruit; sulfuraceous; onion
106	Ethyl 2-methylpentanoate	39255-32-8	Nature Identical	s-PNA	pineapple; fruity; green; pear; waxy; melon
107	Ethyl 3-methylpentanoate	5870-68-8	Nature Identical	s-PNA/t-PNA	pineapple; fruity
108	Ethyl 2-methyl-4-pentenoate	53399-81-8	Artificial	s-PNA	pineapple; fruity; tropical fruit
109	Ethyl 4-methylpent-3-enoate	6849-18-9	Nature Identical	s-STR/t-STR	strawberry; fruity; apple; green; berry; mixed fruit
110	Ethyl methylphenylglycidate	77-83-8	Artificial	s-STR/t-STR	strawberry; fruity; sweet
111	Ethyl 2-nonenoate	17463-01-3	Nature Identical	s-PNA	pineapple; fruity; green; pear; fatty; waxy
112	Ethyl octadienoate	69925-33-3	Nature Identical	s-PNA	pineapple; fruity; pear
113	Ethyl cis-4-octenoate	34495-71-1	Nature Identical	s-PNA	pineapple; fruity; green; pear; fatty
114	Ethyl trans-2-octenoate	7367-82-0	Nature Identical	s-PNA	pineapple; fruity; green; tropical fruit; pear; juicy
115	Ethyl trans-3-octenoate	26553-47-9	Nature identical	s-PNA	pineapple; fruity; tropical fruit; fatty; passion fruit
116	Ethyl oxohexanoate	3249-68-1	Artificial	s-PNA	pineapple; fruity; green; berry
117	Ethyl phenylglycidate	121-39-1	Artificial	s-CAR	caramellic; fruity; sweet; berry
118	Ethyl pyruvate	617-35-6	Nature Identical	s-CAR/t-CAR	caramellic; fruity; sweet
119	Ethyl senecioate	638-10-8	Nature Identical	s-PNA	pineapple; fruity; sweet; apple; chamomile
120	Ethyl tiglate	5837-78-5	Nature Identical	s-CAR	caramellic; fruity; mixed fruit
121	Ethyl valerate	539-82-2	Nature Identical	s-PNA	pineapple; fruity; apple; tropical fruit
122	Ethylbutyraldehyde	97-96-1	Nature Identical	s-CAR	caramellic; fresh; green fruity; pungent; cocoa
123	Ethylhydroxycyclopentenone	21835-01-8	Nature Identical	s-CAR	caramellic; sweet; maple
124	3-Ethyl-4-methylcyclotene	42348-12-9	Nature Identical	s-CAR	caramellic; burned; maple
125	5-Ethyl-3-methylcyclotene	53263-58-4	Artificial*	s-CAR	caramellic; burned; maple; malty
126	2-Ethyl-4-hydroxy-5-methyl-3(2H)-furanone	27538-09-6	Nature Identical	s-CAR	caramellic; sweet; bread
127	Ethylthiophenecarbaldehyde	36880-33-8	Artificial	s-CAR	caramellic; nutty; bitter almond
128	Fraistone	6290-17-1	Artificial	s-STR/t-STR	strawberry; fruity; sweet; apple; fresh
129	Furaneol butyrate	114099-96-6	Nature identical	STR-CAR	strawberry; caramellic; buttery
130	Furfural	98-01-1	Nature Identical	s-CAR	caramellic; sweet; spicy; bread; cereal; almond; yeasty
131	Furfuryl mercaptan	98-02-2	Nature Identical	s-CAR	caramellic; burned; coffee; alliaceous
132	alpha-Furfuryl pentanoate	36701-01-6	Nature Identical	CAR-PNA	caramellic; pineapple; fruity; apple
133	Furfurylidenebutyraldehyde	770-27-4	Artificial	s-CAR	caramellic; nutty; spicy; coconut; vanilla; leather
134	Furylbutanone	699-17-2	Nature Identical	s-CAR	caramellic; spicy
135	Furylmethylketone	1192-62-7	Nature Identical	s-CAR	caramellic; sweet; nutty; cereal; balsamic
136	Furylpropanone	6975-60-6	Nature Identical	s-CAR	caramellic; fruity; sweet; spicy
137	Geranyl hexanoate	10032-02-7	Nature Identical	s-PNA	pineapple; fruity; tropical fruit; rose
138	Geranyl valerate	10402-47-8	Nature identical	s-PNA	pineapple; fruity; rose; tobacco
139	trans-2-Heptenoic acid	10352-88-2	Nature Identical	s-CAR	caramellic; fruity; green; sour; grassy
140	trans-2-Heptenyl acetate	16939-73-4	Nature Identical	s-PNA	pineapple; sweet; tropical fruit; waxy
141	Hexadienyl acetate	1516-17-2	Artificial	s-PNA	pineapple; fruity; sweet; apple; winey; pear
142	Hexadienyl isobutyrate	16491-24-0	Artificial	s-PNA	pineapple; fruity; sweet; tropical fruit
143	Hexadienyl propionate	16491-25-1	Artificial	s-PNA	pineapple; fruity; sweet; winey
144	Hexenolactone	2407-43-4	Nature Identical	s-CAR	caramellic; fruity; spicy; coconut; coumarinic
145	5-Hexenyl butyrate	108058-75-9	Nature Identical	s-PNA/t-PNA	pineapple; fruity; green
146	Hexenyl furoate		Artificial	s-CAR	caramellic; sweet; green; tropical fruit
147	cis-3-Hexenyl trans-2-hexenoate	53398-87-1	Nature identical	s-PNA	pineapple; fruity; apple; green; tropical fruit; pear; melon
148	5-Hexenyl isobutyrate	155514-56-0	Artificial	s-PNA	pineapple; fresh; green fruity
149	Hexenyl levulinate	85554-70-7	Artificial	s-CAR	caramellic; fruity; green; earthy; green apple
150	cis-3-Hexenyl 2-methylbutanoate	53398-85-9	Nature identical	s-PNA	pineapple; fruity; pear; green apple
151	Hexenyl pyruvate	68133-76-6	Nature identical	s-CAR	caramellic; green; spicy
152	(E)-2-Hexenyl valerate	56922-74-8	Artificial	s-PNA	pineapple; fruity; apple; winey; pear; waxy; fresh; cognac
153	Hexyl 2-crotonate	19089-92-0	Artificial	s-PNA	pineapple; fruity; apple; pear; woody
154	Hexyl levulinate	24431-34-3	Artificial	s-CAR	caramellic; fruity; winey; warm
155	Hydroxybutanoic acid lactone	96-48-0	Nature Identical	s-CAR	caramellic; buttery; nutty
156	1-Hydroxy-2-butanone	5077-67-8	Nature Identical	s-CAR	caramellic; oily; brown; alcoholic
157	4-Hydroxybutan-2-one	590-90-9	Nature Identical	s-CAR	caramellic; sweet; milky
158	Hydroxycyclohexenone	10316-66-2	Artificial*	s-CAR	caramellic; burned; harsh; chemical
159	Hydroxydimethyloctanoic acid lactone	499-54-7	Nature Identical	s-CAR	caramellic; maple
160	Hydroxyhexanone	4984-85-4	Nature Identical	s-CAR	caramellic; buttery; dairy
161	Hydroxyisophorone	4883-60-7	Nature Identical	s-CAR	caramellic; sweet
162	Hydroxymethylbenzaldehyde	698-27-1	Nature Identical	s-CAR	caramellic; sweet; burned; coumarinic
163	Hydroxymethylfuranone	19322-27-1	Nature Identical	STR-CAR	strawberry; caramellic; fruity; sweet; berry; burnt sugar
164	Hydroxymethylthienylethanone	133860-42-1	Artificial	s-CAR	caramellic; burned; brown; roasted meat
165	3-Hydroxy-2-pentanone	3142-66-3	Nature Identical	s-CAR	caramellic; buttery; creamy
166	Hydroxyphenylbutanone	5355-63-5	Nature Identical	s-CAR	caramellic; sweet; floral; creamy
167	Isoamyl furanpropionate	7779-67-1	Artificial	s-CAR	caramellic; fruity; sweet; green; fermented; floral
168	Isoamyl hexanoate	2198-61-0	Nature Identical	s-PNA	pineapple; fruity; apple; banana; waxy
169	Isoamyl isovalerate	659-70-1	Nature Identical	s-PNA	pineapple; fruity; apple; green; tropical fruit; apricot; cognac; mango
170	Isoamyl lactate	19329-89-6	Nature Identical	s-CAR	caramellic; fruity; winey; oily
171	Isoamyl levulinate	71172-75-3	Artificial	s-CAR	caramellic; fruity; winey; oily
172	Isoamyl octanoate	2035-99-6	Nature Identical	s-PNA	pineapple; fruity; green; winey; fatty; waxy; oily; cognac
173	Isoamyl propionate	105-68-0	Nature Identical	s-PNA	pineapple; fruity; sweet; tropical fruit; banana; apricot; plum
174	Isoamyl pyruvate	7779-72-8	Artificial	s-CAR	caramellic; fruity; sweet; rum
175	Isobutyl acetate	110-19-0	Nature Identical	s-PNA	pineapple; fruity; apple; pear; banana
176	Isobutyl crotonate	589-66-2	Nature Identical	s-PNA	pineapple; fruity; apple; rum
177	Isobutyl butyrate	539-90-2	Nature Identical	s-PNA	pineapple; fruity; sweet; pear; banana; rum
178	Isobutyl decenoate	106450-11-7	Nature Identical	s-PNA	pineapple; fruity; green; pear
179	Isobutyl furanpropionate	105-01-1	Artificial	s-PNA	pineapple; fruity; winey; rum; brandy
180	Isobutyl hexanoate	105-79-3	Nature Identical	s-PNA	pineapple; fruity; winey
181	Isobutyl isobutyrate	97-85-8	Nature Identical	s-PNA	pineapple; fruity; sweet; winey; banana
182	Isobutyl lactate	585-24-0	Nature Identical	s-CAR	caramellic; fruity; buttery
183	Isobutyl levulinate	3757-32-2	Artificial	s-CAR	caramellic; fruity; oily; herbaceous
184	Isobutyl methylthiobutyrate	127931-21-9	Artificial	s-STR	strawberry; sulfuraceous; cheese; creamy
185	Isobutyl pivalate	5129-38-4	Artificial	s-PNA	pineapple; fruity; sweet; winey; banana
186	Isopentyl methylthiopropionate	93762-35-7	Nature Identical	s-PNA	pineapple; tropical fruit; sulfuraceous
187	Isoprenyl hexanoate	53655-22-4	Nature identical	s-PNA	pineapple; fruity; green; tropical fruit
188	Isopropyl acetoacetate	542-08-5	Artificial	s-CAR	caramellic; fruity; apple; fermented; brandy; heavy fruit
189	Isopropyl butyrate	638-11-9	Nature Identical	STR-PNA	strawberry; pineapple; buttery
190	Isopropyl hexanoate	2311-46-8	Nature Identical	s-PNA/t-PNA	pineapple; fruity; sweet
191	Isopropyl isobutyrate	617-50-5	Nature Identical	s-PNA	pineapple; fruity; pear; fresh
192	Isopropyl isohexanoate	25415-69-4	Artificial	s-PNA	pineapple; fruity; apple
193	Isopropyl isovalerate	32665-23-9	Nature Identical	s-PNA	pineapple; fruity; apple; berry; ethereal; cheese
194	Isopropyl lactate	617-51-6	Artificial	s-CAR	caramellic; fruity; buttery; milky
195	Isopropyl methylbutyrate	66576-71-4	Nature Identical	s-PNA	pineapple; fruity; sweet; apple; green
196	Levulinic acid	123-76-2	Nature Identical	s-CAR	caramellic
197	Maltol Propionate	68555-63-5	Artificial	STR-CAR	strawberry; caramellic; fruity
198	Maltol butyrate	67860-01-9	Artificial	s-CAR	caramellic; fruity; berry
199	Maltyl 2-methylpropanoate	65416-14-0	Artificial	STR-CAR	strawberry; caramellic; sweet
200	Maltol	118-71-8	Nature Identical	STR-CAR	strawberry; caramellic; fruity; sweet; berry
201	Maple furanone	698-10-2	Nature Identical	s-CAR	caramellic; maple
202	Methionyl butyrate	16630-60-7	Nature Identical	s-PNA	pineapple; tropical fruit; sulfuraceous; cheese; savory; mushroom
203	Methoxyphenylpentenone	104-27-8	Artificial	s-CAR	caramellic; sweet; buttery
204	Methoxystyryl isopropyl ketone	103-13-9	Artificial	s-CAR	caramellic; fruity; buttery
205	Methyl acetoxybutyrate	89422-42-4	Nature identical	s-PNA	pineapple; fruity; apple; tropical fruit
206	Methyl 5-acetoxyhexanoate	35234-22-1	Nature identical	s-PNA	pineapple; fruity; apple
207	Methyl acetoxymethylbutyrate	139564-42-4	Nature identical	s-PNA	pineapple; fruity; tropical fruit; burned
208	Methyl furoate	611-13-2	Nature Identical	s-CAR	caramellic; fruity; winey; earthy
209	Methyl 2-hydroxyacetate	96-35-5	Nature Identical	s-CAR	caramellic; ethereal; burnt sugar
210	Methyl hexanethioate	20756-86-9	Nature Identical	s-PNA	pineapple; green; tropical fruit; sulfuraceous; cheese
211	Methyl hexanoate	106-70-7	Nature Identical	s-PNA	pineapple; fruity; apple; ethereal
212	Methyl trans-3-hexenoate	2396-78-3	Nature Identical	s-PNA	pineapple; fruity; green; tropical fruit; honey
213	Methyl cis-3-hexenoate	13894-62-7	Nature Identical	s-PNA/t-PNA	pineapple; fruity; green
214	Methyl hydroxydecanoate	101853-47-8	Artificial	s-PNA/t-PNA	pineapple; fruity; sweet
215	Methyl isobutyrate	547-63-7	Nature Identical	s-PNA	pineapple; fruity; apple; rum; apricot
216	Methyl isovalerate	556-24-1	Nature Identical	s-PNA	pineapple; fruity; apple; ethereal
217	Methyl lactate	27871-49-4	Nature Identical	s-CAR	caramellic; buttery; rum; ethereal; milky
218	Methyl levulinate	624-45-3	Nature Identical	s-CAR	caramellic; fruity; green; burned
219	Methyl methylpentanoate	2177-77-7	Nature Identical	s-PNA	pineapple; fruity; sweet; apple; tropical fruit; berry
220	Methyl octyl sulfide	3698-95-1	Artificial	s-PNA	pineapple; green; tropical fruit; sulfuraceous; onion; wasabi
221	Methyl oxohexanoate	30414-54-1	Artificial	s-CAR	caramellic; fruity; roasted
222	Methyl oxomethylpentanoate	3682-42-6	Artificial	s-CAR	caramellic; fruity; rum
223	Methyl pyruvate	600-22-6	Nature Identical	s-CAR	caramellic; fruity; sweet; spicy; acidic
224	Methyl valerate	624-24-8	Nature Identical	s-PNA	pineapple; apple; ethereal; green fruity
225	Methylallyl hexanoate		Artificial	s-PNA	pineapple; fruity; sharp
226	Methylallyl isobutyrate	816-73-9	Artificial	s-PNA	pineapple; fruity; sweet; ethereal; fresh; sharp; harsh; diffusive
227	Methylbutyl butyrate		Artificial	s-PNA	pineapple; fruity; sweet; banana; ethereal; peach; sharp; plum
228	Methylbutyl hexanoate	2601-13-0	Nature Identical	s-PNA	pineapple; fruity; apple; banana
229	Methylbutyl lactate	638-33-5	Nature Identical	s-CAR	caramellic; fruity; winey; oily
230	Methylbutyl methylbutyrate	2445-78-5	Nature Identical	s-PNA	pineapple; fruity; apple; green; tropical fruit; waxy; berry
231	Methylcrotonic acid	541-47-9	Nature Identical	s-CAR	caramellic; spicy; herbaceous; musty
232	Methylcyclohexenone	1193-18-6	Nature Identical	s-CAR	caramellic; nutty; minty; musty
233	Methylcyclopentenolone butyrate	68227-51-0	Artificial	s-CAR	caramellic; fruity; buttery; creamy
234	Methylcyclopentenolone	80-71-7*	Nature Identical	s-CAR	caramellic; maple; lovage
235	Methylcyclopentenone	2758-18-1	Nature Identical	s-CAR	caramellic; sweet; ketonic; chemical
236	2-Methylfuran-3(2H)-one	41763-99-9	Nature identical	s-CAR	caramellic; sweet; buttery; nutty; roasted; bread
237	5-Methylfuran-3(2H)-one	3511-32-8	Nature Identical	s-CAR	caramellic; sweet; buttery; nutty; roasted; bread
238	Methylfurfural	620-02-0	Nature Identical	s-CAR	caramellic; sweet; nutty; spicy; bread
239	Methylfurfuryl alcohol	3857-25-8	Nature Identical	s-CAR	caramellic; sweet; fermented; cereal; almond
240	Methylfurylpropanedione	1197-20-2	Nature Identical	s-CAR	caramellic; burned
241	Methylfurylpropenal 3-(5-Methyl-2-furyl)prop-2-enal	5555-90-8	Nature Identical	s-CAR	caramellic; spicy; cinnamon
242	Methylnonanedione	113486-29-6	Nature Identical	s-CAR	caramellic; fruity; green; hay
243	2-Methyl-2-pentenoic acid	3142-72-1	Nature Identical	STR-CAR	strawberry; caramellic; sweet; green
244	Methylphenylbutenone	1901-26-4	Artificial	s-CAR	caramellic; fruity; sweet; berry
245	4-Methyl-1-phenyl-2-pentanone	5349-62-2	Artificial	s-CAR	caramellic; fruity; spicy; woody
246	2-Methyltetrahydrofuran-3-one	3188-00-9	Nature Identical	s-CAR	caramellic; sweet; buttery; rum; roasted; bread
247	Methylthiomethyl hexanoate	74758-91-1	Artificial?	s-PNA	pineapple; tropical fruit
248	o-Methylthiophenol	1073-29-6	Nature Identical	s-CAR	caramellic; burned; meaty; smoky; sulfury
249	Methylthiopropyl hexanoate	906079-63-8	Nature Identical	s-PNA	pineapple; tropical fruit; sulfuraceous; meaty; onion; savory
250	Naphthyl butyl ether	10484-56-7	Artificial	s-STR/t-STR	strawberry; fruity; sweet; floral; raspberry
251	Naphthyl isobutyl ether	2173-57-1	Artificial	s-STR/t-STR	strawberry; fruity; sweet; neroli
252	Ocimenyl acetate	197098-61-6	Nature Identical*	s-PNA	pineapple; fruity; green
253	Octane-4,5-dione	5455-24-3	Nature identical	s-CAR	caramellic; fruity; sweet; buttery; fatty; cheese; creamy
254	2-Octen-4-one	4643-27-0	Nature Identical	s-PNA	pineapple; sweet; tropical fruit; green fruity; vegetative; jam
255	(Z)-5-Octenyl acetate	71978-00-2	Nature Identical	s-PNA	pineapple; green; banana; juicy; melon; estery
256	(Z)-5-Octenyl propionate	196109-18-9	Artificial?	s-PNA	pineapple; fruity; apple; green; banana; waxy
257	Octyl acetoacetate	16436-00-3	Artificial	s-CAR	caramellic; fruity; waxy; fermented; oily
258	Oxobutyric acid	600-18-0	Nature Identical	s-CAR	caramellic; sweet; fatty; creamy; brown
259	Oxoethylbutanolide	923291-29-6	Artificial	s-CAR	caramellic; maple; burnt sugar
260	Oxophenylpropionic acid	156-06-9	Nature Identical	s-CAR	caramellic; burned
261	3-Pentanone	96-22-0	Nature Identical	s-CAR	caramellic; fruity; ethereal; cheese
262	Pentanoylthiophene	53119-25-8	Nature identical	s-CAR	caramellic; nutty; roasted; fried
263	4-Pentenoic acid	591-80-0	Artificial*	s-CAR	caramellic; cheese; sour
264	2-Pentenoic acid	13991-37-2	Nature Identical	s-CAR	caramellic; fruity; cheese; sour
265	Phenethyl furoate	7149-32-8	Artificial	s-CAR	caramellic; fruity
266	Phenethyl valerate	7460-74-4	Nature identical	s-PNA	pineapple; fruity; apple; floral; rose; tobacco
267	Phenylpropyl isovalerate	5452-07-3	Artificial	s-STR/t-STR	strawberry; fruity
268	Phenylpropyltetrahydrofuran	3208-40-0	Artificial	s-CAR	caramellic; fruity; sweet; peach; honey; plum
269	Piperitenone oxide	35178-55-3	Nature Identical	s-PNA	pineapple; apple; herbaceous; minty
270	Propionylmethylfuran	23747-34-4	Artificial	s-CAR	caramellic; nutty; roasted; coumarinic; hay; beany
271	Propyl acetoacetate	1779-60-8	Artificial	s-CAR	caramellic; fruity; apple; fermented; brandy; heavy fruit
272	Propyl crotonate	10352-87-1	Nature Identical	s-CAR	caramellic; fruity; apple; ethereal; chamomile
273	Propyl cyclohexanepropionate	16595-06-5	Artificial	s-PNA	pineapple; fruity; sweet; pear; peach
274	Propyl furanacrylate	623-22-3	Artificial	s-STR	strawberry; fruity; sweet; apple; tropical fruit; pear; spicy; honey
275	Propyl hexanoate	626-77-7	Nature Identical	s-PNA	pineapple; sweet; green; tropical fruit
276	Propyl isobutyrate	644-49-5	Nature Identical	s-PNA	pineapple; fruity; tropical fruit
277	Propyl isohexanoate	25415-68-3	Artificial	s-PNA	pineapple; fruity; apple
278	Propyl lactate	616-09-1	Nature Identical	s-CAR	caramellic; sweet; milky
279	Propyl levulinate	645-67-0	Artificial	s-CAR/t-CAR	caramellic; fruity; sweet
280	Propyl mercaptopropionate	19788-50-2	Artificial	s-STR	strawberry; fruity; tropical fruit; meaty
281	Propyl methylbutyrate	37064-20-3	Nature identical	s-PNA	pineapple; fruity; sweet; apple; green
282	Propyl pyruvate	20279-43-0	Artificial	s-CAR	caramellic; fruity; burned
283	Propyl sorbate	10297-72-0	Artificial	s-PNA	pineapple; green; tropical fruit; fresh
284	Propyl valerate	141-06-0	Nature identical	s-PNA	pineapple; fruity; apple; winey; ethereal
285	Propylthiazolidine	24050-10-0	Nature identical	s-CAR	caramellic; green; bread; pungent; radish
286	Sotolon	28664-35-9	Nature Identical	s-CAR/t-CAR	caramellic
287	Strawberry furanone	3658-77-3	Nature Identical	Furaneol	fruity; caramelized pineapple-strawberry; roasted
288	Tetrahydrofurfuryl alcohol	97-99-4	Nature Identical	s-CAR	caramellic; fruity; oily; solvent
289	Tetrahydrofurfuryl butyrate	2217-33-6	Artificial	s-PNA	pineapple; fruity; sweet; tropical fruit; apricot; heavy
290	Tetrahydrofurfuryl propionate	637-65-0	Artificial	s-CAR	caramellic; fruity; sweet; fermented
291	Tetramethylethylcyclohexenone	17369-60-7	Artificial	s-CAR	caramellic; fruity; nutty; creamy
292	Thienylmercaptan	7774-74-5	Artificial	s-CAR	caramellic; burned; sulfuraceous
293	Ethyl 2-methyl-3-pentenoate	1617-23-8	Artificial	STR-PNA	strawberry; pineapple; fruity; sweet

## Sheet: Table S2 Molecular descriptors
Table S2. The molecular structures of the 298 compounds in the StCaPi-set and their related molecular descriptor values.
No	Odorant name by isomer	Odorant name in Table S1	subset odor	ChemicalName	SMILES	InChI	Molecular_Formula	MW	ALogP98	Apol	PHI	3D_PolarSASA	Num_Rings
1	Acetol	Acetol	s-CAR	1-hydroxypropan-2-one	CC(=O)CO	InChI=1S/C3H6O2/c1-3(5)2-4/h4H,2H2,1H3	C3H6O2	74.0785	-0.776	2479.48	1.76447	99.661	0
2	Acetonyl acetate	Acetonyl acetate	s-CAR	acetonyl acetate	CC(=O)COC(C)=O	InChI=1S/C5H8O3/c1-4(6)3-8-5(2)7/h3H2,1-2H3	C5H8O3	116.115	-0.397	3960.14	3.03025	94.717	0
3	Acetylcyclopentanone	Acetylcyclopentanone	s-CAR	2-acetylcyclopentanone	CC(=O)C1CCCC1=O	InChI=1S/C7H10O2/c1-5(8)6-3-2-4-7(6)9/h6H,2-4H2,1H3/t6-/m0/s1	C7H10O2	126.153	0.564	4501.1	1.64676	79.716	1
4	2-Acetyl-3,5-dimethylfuran	2-Acetyl-3,5-dimethylfuran	s-CAR	1-(3,5-dimethyl-2-furyl)ethanone	CC(=O)C1=C(C)C=C(C)O1	InChI=1S/C8H10O2/c1-5-4-6(2)10-8(5)7(3)9/h4H,1-3H3	C8H10O2	138.164	1.596	5534.3	1.61699	51.001	1
5	Acetylmethylfuran	Acetylmethylfuran	s-CAR	1-(5-methyl-2-furyl)ethanone	CC(=O)C1=CC=C(C)O1	InChI=1S/C7H8O2/c1-5-3-4-7(9-5)6(2)8/h3-4H,1-2H3	C7H8O2	124.137	1.11	5021.04	1.38532	65.144	1
6	Acetylmethylpyrimidine	Acetylmethylpyrimidine	s-CAR	1-(2-methylpyrimidin-4-yl)ethanone	CC(=O)C1=NC(=NC=C1)C	InChI=1S/C7H8N2O/c1-5(10)7-3-4-8-6(2)9-7/h3-4H,1-2H3	C7H8N2O	136.151	0.175	5402.04	1.75561	76.059	1
7	2-Acetyl-3,4,5,6-tetrahydropyridine	2-Acetyl-3,4,5,6-tetrahydropyridine	s-CAR	1-(2,3,4,5-tetrahydropyridin-6-yl)ethanone	CC(=O)C1=NCCCC1	InChI=1S/C7H11NO/c1-6(9)7-4-2-3-5-8-7/h2-5H2,1H3	C7H11NO	125.168	0.744	4567.18	1.98069	56.874	1
8	Allyl Thiohexanoate	Allyl Thiohexanoate	s-PNA	S-allyl hexanethioate	CCCCCC(=O)SCC=C	InChI=1S/C9H16OS/c1-3-5-6-7-9(10)11-8-4-2/h4H,2-3,5-8H2,1H3	C9H16OS	172.288	3.231	7213.88	7.4737	67.489	0
9	Allyl butanoate	Allyl butanoate	s-PNA	allyl butanoate	CCCC(=O)OCC=C	InChI=1S/C7H12O2/c1-3-5-7(8)9-6-4-2/h4H,2-3,5-6H2,1H3	C7H12O2	128.169	1.761	4847.16	5.12028	48.001	0
10	Allyl cyclohexanebutyrate	Allyl cyclohexanebutyrate	s-PNA/t-PNA	allyl 4-cyclohexylbutanoate	C=CCOC(=O)CCCC1CCCCC1	InChI=1S/C13H22O2/c1-2-11-15-13(14)10-6-9-12-7-4-3-5-8-12/h2,12H,1,3-11H2	C13H22O2	210.313	3.922	7785.96	6.33123	46.287	1
11	Allyl cyclohexanepropionate	Allyl cyclohexanepropionate	s-PNA	allyl 3-cyclohexylpropanoate	C=CCOC(=O)CCC1CCCCC1	InChI=1S/C12H20O2/c1-2-10-14-12(13)9-8-11-6-4-3-5-7-11/h2,11H,1,3-10H2	C12H20O2	196.286	3.466	7272.7	5.53379	46.715	1
12	Allyl cyclohexyloxyacetate	Allyl cyclohexyloxyacetate	s-PNA	allyl 2-(cyclohexoxy)acetate	C=CCOC(=O)COC1CCCCC1	InChI=1S/C11H18O3/c1-2-8-13-11(12)9-14-10-6-4-3-5-7-10/h2,10H,1,3-9H2	C11H18O3	198.259	2.232	7104.24	5.48664	59.573	1
13	Allyl cyclohexyloxypropionate	Allyl cyclohexyloxypropionate	s-PNA	allyl 3-(cyclohexoxy)propanoate	C=CCOC(=O)CCOC1CCCCC1	InChI=1S/C12H20O3/c1-2-9-15-12(13)8-10-14-11-6-4-3-5-7-11/h2,11H,1,3-10H2	C12H20O3	212.285	2.48	7617.5	6.28212	59.144	1
14	Allyl furoate	Allyl furoate	s-CAR	allyl furan-2-carboxylate	C=CCOC(=O)C1=CC=CO1	InChI=1S/C8H8O3/c1-2-5-11-8(9)7-4-3-6-10-7/h2-4,6H,1,5H2	C8H8O3	152.147	1.697	6193.74	2.62905	68.573	1
15	Allyl heptanoate	Allyl heptanoate	s-PNA	allyl heptanoate	CCCCCCC(=O)OCC=C	InChI=1S/C10H18O2/c1-3-5-6-7-8-10(11)12-9-4-2/h4H,2-3,5-9H2,1H3	C10H18O2	170.249	3.129	6386.94	8.02194	48.858	0
16	Allyl hexanoate	Allyl hexanoate	s-PNA/EXP	allyl hexanoate	CCCCCC(=O)OCC=C	InChI=1S/C9H16O2/c1-3-5-6-7-9(10)11-8-4-2/h4H,2-3,5-8H2,1H3	C9H16O2	156.222	2.673	5873.68	7.04851	48.001	0
17	Allyl ionone	Allyl ionone	s-PNA	(1E)-1-(2,6,6-trimethylcyclohex-2-en-1-yl)hepta-1,6-dien-3-one	CC1=CCCC(C)(C)C1\\C=C\\C(=O)CCC=C	InChI=1S/C16H24O/c1-5-6-9-14(17)10-11-15-13(2)8-7-12-16(15,3)4/h5,8,10-11,15H,1,6-7,9,12H2,2-4H3/b11-10+/t15-/m1/s1	C16H24O	232.361	4.349	9610.22	4.92067	32.572	1
18	Allyl isoamyloxyacetate	Allyl isoamyloxyacetate	s-PNA	allyl 2-isopentyloxyacetate	CC(C)CCOCC(=O)OCC=C	InChI=1S/C10H18O3/c1-4-6-13-10(11)8-12-7-5-9(2)3/h4,9H,1,5-8H2,2-3H3	C10H18O3	186.248	1.954	6731.74	7.54265	59.573	0
19	Allyl isohexanoate	Allyl isohexanoate	s-PNA	allyl 4-methylpentanoate	CC(C)CCC(=O)OCC=C	InChI=1S/C9H16O2/c1-4-7-11-9(10)6-5-8(2)3/h4,8H,1,5-7H2,2-3H3	C9H16O2	156.222	2.468	5873.68	5.75465	45.858	0
20	Allyl methylbutyrate	Allyl methylbutyrate	s-PNA	allyl 2-methylbutanoate	CCC(C)C(=O)OCC=C	InChI=1S/C8H14O2/c1-4-6-10-8(9)7(3)5-2/h4,7H,1,5-6H2,2-3H3/t7-/m1/s1	C8H14O2	142.196	2.223	5360.42	4.852	39.858	0
21	Allyl methylthiopropionate	Allyl methylthiopropionate	s-PNA	allyl 3-methylsulfanylpropanoate	CSCCC(=O)OCC=C	InChI=1S/C7H12O2S/c1-3-5-9-7(8)4-6-10-2/h3H,1,4-6H2,2H3	C7H12O2S	160.234	1.367	6532.16	6.6433	87.893	0
22	Allyl nonanoate	Allyl nonanoate	s-PNA	allyl nonanoate	CCCCCCCCC(=O)OCC=C	InChI=1S/C12H22O2/c1-3-5-6-7-8-9-10-12(13)14-11-4-2/h4H,2-3,5-11H2,1H3	C12H22O2	198.302	4.042	7413.46	9.98055	48.858	0
23	Allyl octanoate	Allyl octanoate	s-PNA	allyl octanoate	CCCCCCCC(=O)OCC=C	InChI=1S/C11H20O2/c1-3-5-6-7-8-9-11(12)13-10-4-2/h4H,2-3,5-10H2,1H3	C11H20O2	184.275	3.585	6900.2	8.9996	48.43	0
24	Allyl pentanoate	Allyl pentanoate	s-PNA	allyl pentanoate	CCCCC(=O)OCC=C	InChI=1S/C8H14O2/c1-3-5-6-8(9)10-7-4-2/h4H,2-3,5-7H2,1H3	C8H14O2	142.196	2.217	5360.42	6.08063	48.001	0
25	Allyl phenoxyacetate	Allyl phenoxyacetate	s-PNA	allyl 2-phenoxyacetate	C=CCOC(=O)COC1=CC=CC=C1	InChI=1S/C11H12O3/c1-2-8-13-11(12)9-14-10-6-4-3-5-7-10/h2-7H,1,8-9H2	C11H12O3	192.211	2.137	8048.16	4.61055	62.144	1
26	Allyl phenylacetate	Allyl phenylacetate	s-PNA	allyl 2-phenylacetate	C=CCOC(=O)CC1=CC=CC=C1	InChI=1S/C11H12O2/c1-2-8-13-11(12)9-10-6-4-3-5-7-10/h2-7H,1,8-9H2	C11H12O2	176.212	2.337	7703.36	3.92517	39.858	1
27	Allyl sorbate	Allyl sorbate	s-PNA	allyl (2E,4E)-hexa-2,4-dienoate	C\\C=C\\C=C\\C(=O)OCC=C	InChI=1S/C9H12O2/c1-3-5-6-7-9(10)11-8-4-2/h3-7H,2,8H2,1H3/b5-3+,7-6+	C9H12O2	152.19	2.205	6502.96	6.23504	49.715	0
28	Allyl undecenoate	Allyl undecenoate	s-PNA	allyl undec-10-enoate	C=CCCCCCCCCC(=O)OCC=C	InChI=1S/C14H24O2/c1-3-5-6-7-8-9-10-11-12-14(15)16-13-4-2/h3-4H,1-2,5-13H2	C14H24O2	224.339	4.563	8754.62	11.5033	47.572	0
29	Amyl furoate	Amyl furoate	s-CAR	pentyl furan-2-carboxylate	CCCCCOC(=O)C1=CC=CO1	InChI=1S/C10H14O3/c1-2-3-4-7-13-10(11)9-6-5-8-12-9/h5-6,8H,2-4,7H2,1H3	C10H14O3	182.216	2.865	6905.62	4.25708	68.573	1
30	Amyl hexanoate	Amyl hexanoate	s-PNA	pentyl hexanoate	CCCCCOC(=O)CCCCC	InChI=1S/C11H22O2/c1-3-5-7-9-11(12)13-10-8-6-4-2/h3-10H2,1-2H3	C11H22O2	186.291	3.841	6585.56	9.43945	47.572	0
31a	5-pentyl-dioxan-2-one	Amyl keto dioxane	s-CAR	5-pentyl-1,4-dioxan-2-one	CCCCCC1COC(=O)CO1	InChI=1S/C9H16O3/c1-2-3-4-5-8-6-12-9(10)7-11-8/h8H,2-7H2,1H3/t8-/m0/s1	C9H16O3	172.222	1.846	5763.08	4.25227	82.288	1
31b	6-pentyl-dioxan-2-one	Amyl keto dioxane	s-CAR	6-pentyl-1,4-dioxan-2-one	CCCCCC1COCC(=O)O1	InChI=1S/C9H16O3/c1-2-3-4-5-8-6-11-7-9(10)12-8/h8H,2-7H2,1H3/t8-/m0/s1	C9H16O3	172.222	1.846	5763.08	4.25227	78.859	1
32	Amyl lactate	Amyl lactate	s-CAR	pentyl 2-hydroxypropanoate	CCCCCOC(=O)C(C)O	InChI=1S/C8H16O3/c1-3-4-5-6-11-8(10)7(2)9/h7,9H,3-6H2,1-2H3/t7-/m1/s1	C8H16O3	160.211	1.618	5390.58	6.07458	90.428	0
33	Amyl levulinate	Amyl levulinate	s-CAR	pentyl 4-oxopentanoate	CCCCCOC(=O)CCC(C)=O	InChI=1S/C10H18O3/c1-3-4-5-8-13-10(12)7-6-9(2)11/h3-8H2,1-2H3	C10H18O3	186.248	1.751	6526.44	7.49729	84.859	0
34	Amyl propionate	Amyl propionate	s-PNA	pentyl propanoate	CCCCCOC(=O)CC	InChI=1S/C8H16O2/c1-3-5-6-7-10-8(9)4-2/h3-7H2,1-2H3	C8H16O2	144.211	2.472	5045.78	6.49627	45.429	0
35	Angelic acid	Angelic acid	s-CAR	(Z)-2-methylbut-2-enoic acid	C\\C=C(\\C)C(O)=O	InChI=1S/C5H8O2/c1-3-4(2)5(6)7/h3H,1-2H3,(H,6,7)/b4-3-	C5H8O2	100.116	1.341	3820.64	2.29985	81.505	0
36	Benzyl disulfide	Benzyl disulfide	s-CAR	(benzyldisulfanyl)methylbenzene	C(SSCC1=CC=CC=C1)C2=CC=CC=C2	InChI=1S/C14H14S2/c1-3-7-13(8-4-1)11-15-16-12-14-9-5-2-6-10-14/h1-10H,11-12H2	C14H14S2	246.391	4.552	12302.7	4.84009	56.104	2
37	Benzyl hexanoate	Benzyl hexanoate	s-PNA	benzyl hexanoate	CCCCCC(=O)OCC1=CC=CC=C1	InChI=1S/C13H18O2/c1-2-3-5-10-13(14)15-11-12-8-6-4-7-9-12/h4,6-9H,2-3,5,10-11H2,1H3	C13H18O2	206.281	3.64	8415.24	5.70882	40.286	1
38	Benzyl lactate	Benzyl lactate	s-CAR	benzyl 3-hydroxypropanoate	OCCC(=O)OCC1=CC=CC=C1	InChI=1S/C10H12O3/c11-7-6-10(12)13-8-9-4-2-1-3-5-9/h1-5,11H,6-8H2	C10H12O3	180.2	1.18	7220.26	4.15178	96.934	1
39	Benzyl levulinate	Benzyl levulinate	s-CAR/t-CAR	benzyl 4-oxopentanoate	CC(=O)CCC(=O)OCC1=CC=CC=C1	InChI=1S/C12H14O3/c1-10(13)7-8-12(14)15-9-11-5-3-2-4-6-11/h2-6H,7-9H2,1H3	C12H14O3	206.238	1.55	8356.12	4.70576	79.288	1
40	Butenoic acid	Butenoic acid	s-CAR	(Z)-but-2-enoic acid	C\\C=C/C(O)=O	InChI=1S/C4H6O2/c1-2-3-4(5)6/h2-3H,1H3,(H,5,6)/b3-2-	C4H6O2	86.0892	0.895	3307.38	2.32595	89.22	0
41	n-Butyl acetate	n-Butyl acetate	s-PNA	butyl acetate	CCCCOC(C)=O	InChI=1S/C6H12O2/c1-3-4-5-8-6(2)7/h3-5H2,1-2H3	C6H12O2	116.158	1.349	4019.26	4.55971	54.858	0
42	tert-Butyl acetoacetate	tert-Butyl acetoacetate	s-CAR	tert-butyl 3-oxobutanoate	CC(=O)CC(=O)OC(C)(C)C	InChI=1S/C8H14O3/c1-6(9)5-7(10)11-8(2,3)4/h5H2,1-4H3	C8H14O3	158.195	0.863	5499.92	3.39141	63.001	0
43	Butyl angelate	Butyl angelate	s-CAR	butyl (Z)-2-methylbut-2-enoate	CCCCOC(=O)\\C(C)=C/C	InChI=1S/C9H16O2/c1-4-6-7-11-9(10)8(3)5-2/h5H,4,6-7H2,1-3H3/b8-5-	C9H16O2	156.222	2.896	5873.68	5.75465	32.143	0
44	sec-Butyl butyrate	sec-Butyl butyrate	s-PNA	(1-methylpropyl) butanoate	CCCC(=O)OC(C)CC	InChI=1S/C8H16O2/c1-4-6-8(9)10-7(3)5-2/h7H,4-6H2,1-3H3/t7-/m1/s1	C8H16O2	144.211	2.394	5045.78	5.21715	37.286	0
45	Butyl crotonate	Butyl crotonate	s-PNA	butyl (E)-but-2-enoate	CCCCOC(=O)\\C=C\\C	InChI=1S/C8H14O2/c1-3-5-7-10-8(9)6-4-2/h4,6H,3,5,7H2,1-2H3/b6-4+	C8H14O2	142.196	2.449	5360.42	6.08063	47.144	0
46	Butyl butyrate	Butyl butyrate	s-PNA	butyl butanoate	CCCCOC(=O)CCC	InChI=1S/C8H16O2/c1-3-5-7-10-8(9)6-4-2/h3-7H2,1-2H3	C8H16O2	144.211	2.472	5045.78	6.49627	47.144	0
47	Butyl butyrylglycolate	Butyl butyrylglycolate	s-CAR	(2-butoxy-2-oxo-ethyl) butanoate	CCCCOC(=O)COC(=O)CCC	InChI=1S/C10H18O4/c1-3-5-7-13-10(12)8-14-9(11)6-4-2/h3-8H2,1-2H3	C10H18O4	202.248	2.179	6871.24	8.37328	92.145	0
48	Butyl caproate	Butyl caproate	s-PNA	butyl hexanoate	CCCCCC(=O)OCCCC	InChI=1S/C10H20O2/c1-3-5-7-8-10(11)12-9-6-4-2/h3-9H2,1-2H3	C10H20O2	172.265	3.385	6072.3	8.45508	44.572	0
49	n-Butyl 2-hydroxypropanoate	n-Butyl 2-hydroxypropanoate	s-CAR	butyl 2-hydroxypropanoate	CCCCOC(=O)C(C)O	InChI=1S/C7H14O3/c1-3-4-5-10-7(9)6(2)8/h6,8H,3-5H2,1-2H3/t6-/m0/s1	C7H14O3	146.184	1.161	4877.32	5.1601	90.779	0
50	sec-Butyl lactate	sec-Butyl lactate	s-CAR	(1-methylpropyl) 2-hydroxypropanoate	CCC(C)OC(=O)C(C)O	InChI=1S/C7H14O3/c1-4-5(2)10-7(9)6(3)8/h5-6,8H,4H2,1-3H3/t5-,6-/m0/s1	C7H14O3	146.184	1.083	4877.32	4.23158	82.285	0
51	Butyl levulinate	Butyl levulinate	s-CAR	butyl 4-oxopentanoate	CCCCOC(=O)CCC(C)=O	InChI=1S/C9H16O3/c1-3-4-7-12-9(11)6-5-8(2)10/h3-7H2,1-2H3	C9H16O3	172.222	1.295	6013.18	6.56966	82.288	0
52	Butyl methylbutyrate	Butyl methylbutyrate	s-PNA	butyl 2-methylbutanoate	CCCCOC(=O)C(C)CC	InChI=1S/C9H18O2/c1-4-6-7-11-9(10)8(3)5-2/h8H,4-7H2,1-3H3/t8-/m0/s1	C9H18O2	158.238	2.935	5559.04	6.13369	40.286	0
53	Butyl methylcrotonate	Butyl methylcrotonate	s-CAR	(1-methylpropyl) (E)-2-methylbut-2-enoate	CCC(C)OC(=O)\\C(C)=C\\C	InChI=1S/C9H16O2/c1-5-7(3)9(10)11-8(4)6-2/h5,8H,6H2,1-4H3/b7-5+/t8-/m0/s1	C9H16O2	156.222	2.817	5873.68	4.78691	35.143	0
54a	5-butyl-dioxan-2-one	Butylketodioxane	s-CAR	5-butyl-1,4-dioxan-2-one	CCCCC1COC(=O)CO1	InChI=1S/C8H14O3/c1-2-3-4-7-5-11-8(9)6-10-7/h7H,2-6H2,1H3/t7-/m1/s1	C8H14O3	158.195	1.389	5249.82	3.52453	81.431	1
54b	6-butyl-dioxan-2-one	Butylketodioxane	s-CAR	6-butyl-1,4-dioxan-2-one	CCCCC1COCC(=O)O1	InChI=1S/C8H14O3/c1-2-3-4-7-5-10-6-8(9)11-7/h7H,2-6H2,1H3/t7-/m1/s1	C8H14O3	158.195	1.389	5249.82	3.52453	92.574	1
55	Cinnamyl isobutyrate	Cinnamyl isobutyrate	s-PNA	[(E)-cinnamyl] 2-methylpropanoate	CC(C)C(=O)OC\\C=C\\C1=CC=CC=C1	InChI=1S/C13H16O2/c1-11(2)13(14)15-10-6-9-12-7-4-3-5-8-12/h3-9,11H,10H2,1-2H3/b9-6+	C13H16O2	204.265	3.201	8729.88	4.77793	41.144	1
56	Citronellyl hexanoate	Citronellyl hexanoate	s-PNA	(3,7-dimethyloct-6-enyl) hexanoate	CCCCCC(=O)OCCC(C)CCC=C(C)C	InChI=1S/C16H30O2/c1-5-6-7-11-16(17)18-13-12-15(4)10-8-9-14(2)3/h9,15H,5-8,10-13H2,1-4H3/t15-/m1/s1	C16H30O2	254.408	5.463	9466.5	11.0587	60.43	0
57	Crotonic acid	Crotonic acid	s-CAR	(E)-but-2-enoic acid	C\\C=C\\C(O)=O	InChI=1S/C4H6O2/c1-2-3-4(5)6/h2-3H,1H3,(H,5,6)/b3-2+	C4H6O2	86.0892	0.895	3307.38	2.32595	100.246	0
58	Cyclohexaneacetic acid	Cyclohexaneacetic acid	s-CAR	2-cyclohexylacetic acid	OC(=O)CC1CCCCC1	InChI=1S/C8H14O2/c9-8(10)6-7-4-2-1-3-5-7/h7H,1-6H2,(H,9,10)	C8H14O2	142.196	2.167	4905.02	2.87273	92.687	1
59	Cyclohexyl acetoacetate	Cyclohexyl acetoacetate	s-CAR	cyclohexyl 3-oxobutanoate	CC(=O)CC(=O)OC1CCCCC1	InChI=1S/C10H16O3/c1-8(11)7-10(12)13-9-5-3-2-4-6-9/h9H,2-7H2,1H3	C10H16O3	184.232	1.79	6385.68	4.08957	69.43	1
60	Cyclohexyl caproate	Cyclohexyl caproate	s-PNA	cyclohexyl hexanoate	CCCCCC(=O)OC1CCCCC1	InChI=1S/C12H22O2/c1-2-3-5-10-12(13)14-11-8-6-4-7-9-11/h11H,2-10H2,1H3	C12H22O2	198.302	3.914	6958.06	5.84558	35.572	1
61	Cyclohexyl propionate	Cyclohexyl propionate	s-PNA	cyclohexyl propanoate	CCC(=O)OC1CCCCC1	InChI=1S/C9H16O2/c1-2-9(10)11-8-6-4-3-5-7-8/h8H,2-7H2,1H3	C9H16O2	156.222	2.546	5418.28	3.56588	34.715	1
62	Cyclotene acetate	Cyclotene acetate	s-CAR/t-CAR	(2-methyl-5-oxo-cyclopenten-1-yl) acetate	CC(=O)OC1=C(C)CCC1=O	InChI=1S/C8H10O3/c1-5-3-4-7(10)8(5)11-6(2)9/h3-4H2,1-2H3	C8H10O3	154.163	0.753	5673.8	2.19359	68.573	1
63	Cyclotene isobutyrate	Cyclotene isobutyrate	s-CAR	(2-methyl-5-oxo-cyclopenten-1-yl) 2-methylpropanoate	CC(C)C(=O)OC1=C(C)CCC1=O	InChI=1S/C10H14O3/c1-6(2)10(12)13-9-7(3)4-5-8(9)11/h6H,4-5H2,1-3H3	C10H14O3	182.216	1.882	6700.32	2.98445	57.001	1
64	Cyclotene propionate	Cyclotene propionate	s-CAR	(2-methyl-5-oxo-cyclopenten-1-yl) propanoate	CCC(=O)OC1=C(C)CCC1=O	InChI=1S/C9H12O3/c1-3-8(11)12-9-6(2)4-5-7(9)10/h3-5H2,1-2H3	C9H12O3	168.19	1.42	6187.06	2.75989	59.144	1
65	epsilon-Decalactone	epsilon-Decalactone	s-CAR	7-butyloxepan-2-one	CCCCC1CCCCC(=O)O1	InChI=1S/C10H18O2/c1-2-3-6-9-7-4-5-8-10(11)12-9/h9H,2-8H2,1H3/t9-/m0/s1	C10H18O2	170.249	3.002	5931.54	4.29635	57.001	1
66	9-Decen-2-one	9-Decen-2-one	s-PNA	dec-9-en-2-one	CC(=O)CCCCCCC=C	InChI=1S/C10H18O/c1-3-4-5-6-7-8-9-10(2)11/h3H,1,4-9H2,2H3	C10H18O	154.249	2.909	6042.14	7.11312	37.715	0
67	Decyl acetate	Decyl acetate	s-PNA	decyl acetate	CCCCCCCCCCOC(C)=O	InChI=1S/C12H24O2/c1-3-4-5-6-7-8-9-10-11-14-12(2)13/h3-11H2,1-2H3	C12H24O2	200.318	4.086	7098.82	10.4261	55.715	0
68	Decyl hexanoate	Decyl hexanoate	s-PNA	decyl hexanoate	CCCCCCCCCCOC(=O)CCCCC	InChI=1S/C16H32O2/c1-3-5-7-8-9-10-11-13-15-18-16(17)14-12-6-4-2/h3-15H2,1-2H3	C16H32O2	256.424	6.122	9151.86	14.3882	45.001	0
69	Dihydrodihydroxymethylpyranone	Dihydrodihydroxymethylpyranone	s-CAR/t-CAR	3,5-dihydroxy-6-methyl-2,3-dihydropyran-4-one	CC1=C(O)C(=O)C(O)CO1	InChI=1S/C6H8O4/c1-3-5(8)6(9)4(7)2-10-3/h4,7-8H,2H2,1H3/t4-/m0/s1	C6H8O4	144.125	-0.775	4882.74	1.84524	144.039	1
70	3,4-Dimethyl-1,2-cyclopentadione	3,4-Dimethyl-1,2-cyclopentadione	s-CAR	2-hydroxy-3,4-dimethyl-cyclopent-2-en-1-one	CC1CC(=O)C(=C1C)O	InChI=1S/C7H10O2/c1-4-3-6(8)7(9)5(4)2/h4,9H,3H2,1-2H3/t4-/m0/s1	C7H10O2	126.153	0.995	4706.4	1.4092	92.61	1
71	3,5-Dimethyl-1,2-cyclopentadione	3,5-Dimethyl-1,2-cyclopentadione	s-CAR	2-hydroxy-3,5-dimethyl-cyclopent-2-en-1-one	CC1CC(=C(O)C1=O)C	InChI=1S/C7H10O2/c1-4-3-5(2)7(9)6(4)8/h4,9H,3H2,1-2H3/t4-/m1/s1	C7H10O2	126.153	1.206	4706.4	1.4092	87.896	1
72	Dimethylcyclopentenone	Dimethylcyclopentenone	s-CAR	3,4-dimethylcyclopent-2-en-1-one	CC1CC(=O)C=C1C	InChI=1S/C7H10O/c1-5-3-7(8)4-6(5)2/h3,6H,4H2,1-2H3/t6-/m1/s1	C7H10O	110.154	1.533	4361.6	1.19993	49.715	1
73	Dimethylethoxyfuranone	Dimethylethoxyfuranone	STR-CAR	4-ethoxy-2,5-dimethyl-furan-3-one	CCOC1=C(C)OC(C)C1=O	InChI=1S/C8H12O3/c1-4-10-8-6(3)11-5(2)7(8)9/h5H,4H2,1-3H3/t5-/m0/s1	C8H12O3	156.179	0.688	5564.46	2.41517	72.002	1
74	Dimethylfuranone	Dimethylfuranone	s-CAR	2,5-dimethylfuran-3-one	CC1OC(=CC1=O)C	InChI=1S/C6H8O2/c1-4-3-6(7)5(2)8-4/h3,5H,1-2H3/t5-/m0/s1	C6H8O2	112.127	0.651	4193.14	1.17557	64.287	1
75	Dimethylmethoxyfuranone	Dimethylmethoxyfuranone	s-CAR	4-methoxy-2,5-dimethyl-furan-3-one	COC1=C(C)OC(C)C1=O	InChI=1S/C7H10O3/c1-4-6(8)7(9-3)5(2)10-4/h4H,1-3H3/t4-/m1/s1	C7H10O3	142.152	0.339	5051.2	1.87327	75.002	1
76	2,3-Dimethylpyrazine	2,3-Dimethylpyrazine	s-CAR	2,3-dimethylpyrazine	CC1=C(C)N=CC=N1	InChI=1S/C6H8N2/c1-5-6(2)8-4-3-7-5/h3-4H,1-2H3	C6H8N2	108.141	0.094	4434.64	1.24206	38.056	1
77	2-Ethoxy-6-methylpyrazine	2-Ethoxy-6-methylpyrazine	s-PNA	2-ethoxy-6-methyl-pyrazine	CCOC1=NC(=CN=C1)C	InChI=1S/C7H10N2O/c1-3-10-7-5-8-4-6(2)9-7/h4-5H,3H2,1-2H3	C7H10N2O	138.167	0.682	5292.7	2.33779	60.869	1
78	Ethyl acetoxymethylbutyrate	Ethyl acetoxymethylbutyrate	s-PNA	ethyl 3-acetoxy-2-methyl-butanoate	CCOC(=O)C(C)C(C)OC(C)=O	InChI=1S/C9H16O4/c1-5-12-9(11)6(2)7(3)13-8(4)10/h6-7H,5H2,1-4H3/t6-,7+/m1/s1	C9H16O4	188.221	1.165	6357.98	5.49719	82.716	0
79	Ethyl acetoxypropionate	Ethyl acetoxypropionate	s-CAR	ethyl 2-acetoxypropanoate	CCOC(=O)C(C)OC(C)=O	InChI=1S/C7H12O4/c1-4-10-7(9)5(2)11-6(3)8/h5H,4H2,1-3H3/t5-/m0/s1	C7H12O4	160.168	0.561	5331.46	4.64781	99.86	0
80	Ethyl acetylbutyrate	Ethyl acetylbutyrate	s-CAR	ethyl 2-ethyl-3-oxo-butanoate	CCOC(=O)C(CC)C(C)=O	InChI=1S/C8H14O3/c1-4-7(6(3)9)8(10)11-5-2/h7H,4-5H2,1-3H3/t7-/m0/s1	C8H14O3	158.195	1.199	5499.92	4.69814	63.43	0
81	Ethyl acetylcinnamate	Ethyl acetylcinnamate	s-CAR	ethyl (2E)-2-benzylidene-3-oxo-butanoate	CCOC(=O)C(=CC1=CC=CC=C1)C(C)=O	InChI=1S/C13H14O3/c1-3-16-13(15)12(10(2)14)9-11-7-5-4-6-8-11/h4-9H,3H2,1-2H3/b12-9+	C13H14O3	218.248	2.192	9184.02	4.60649	67.287	1
82	Ethyl aconitate	Ethyl aconitate	s-CAR	(2Z)-2-(2-ethoxy-2-oxo-ethylidene)butanedioic acid	CCOC(=O)\\C=C(\\CC(O)=O)C(O)=O	InChI=1S/C8H10O6/c1-2-14-7(11)4-5(8(12)13)3-6(9)10/h4H,2-3H2,1H3,(H,9,10)(H,12,13)/b5-4-	C8H10O6	202.161	0.238	6958.3	5.53902	187.129	0
83	Ethyl crotonate	Ethyl crotonate	s-CAR	ethyl (E)-but-2-enoate	CCOC(=O)\\C=C\\C	InChI=1S/C6H10O2/c1-3-5-6(7)8-4-2/h3,5H,4H2,1-2H3/b5-3+	C6H10O2	114.142	1.469	4333.9	4.17048	47.144	0
84	Ethyl butyrate	Ethyl butyrate	s-PNA	ethyl butanoate	CCCC(=O)OCC	InChI=1S/C6H12O2/c1-3-5-6(7)8-4-2/h3-5H2,1-2H3	C6H12O2	116.158	1.492	4019.26	4.55971	44.572	0
85	Ethyl cyclohexanepropionate	Ethyl cyclohexanepropionate	s-PNA/t-PNA	ethyl 3-cyclohexylpropanoate	CCOC(=O)CCC1CCCCC1	InChI=1S/C11H20O2/c1-2-13-11(12)9-8-10-6-4-3-5-7-10/h10H,2-9H2,1H3	C11H20O2	184.275	3.197	6444.8	5.0579	44.572	1
86	Ethyl cis-4-decenoate	Ethyl cis-4-decenoate	STR-PNA	ethyl (Z)-dec-4-enoate	CCCCC\\C=C/CCC(=O)OCC	InChI=1S/C12H22O2/c1-3-5-6-7-8-9-10-11-12(13)14-4-2/h8-9H,3-7,10-11H2,1-2H3/b9-8-	C12H22O2	198.302	3.785	7413.46	9.98055	47.144	0
87	Ethyl trans-4-decenoate	Ethyl trans-4-decenoate	s-PNA	ethyl (E)-dec-4-enoate	CCCCC\\C=C\\CCC(=O)OCC	InChI=1S/C12H22O2/c1-3-5-6-7-8-9-10-11-12(13)14-4-2/h8-9H,3-7,10-11H2,1-2H3/b9-8+	C12H22O2	198.302	3.785	7413.46	9.98055	45.001	0
88	Ethyl dioxohexanoate	Ethyl dioxohexanoate	s-CAR	ethyl (Z)-2-hydroxy-4-oxo-hex-2-enoate	CCOC(=O)\\C(O)=C\\C(=O)CC	InChI=1S/C8H12O4/c1-3-6(9)5-7(10)8(11)12-4-2/h5,10H,3-4H2,1-2H3/b7-5-	C8H12O4	172.178	0.843	6159.36	5.15625	102.548	0
89	Ethyl ethoxycrotonate	Ethyl ethoxycrotonate	s-CAR	ethyl (Z)-3-methoxybut-2-enoate	CCO\\C(C)=C\\C(=O)OCC	InChI=1S/C7H12O3/c1-4-10-7(8)5-6(2)9-3/h5H,4H2,1-3H3/b6-5-	C7H12O3	144.168	0.955	5191.96	4.79701	51.858	0
90	Ethyl furylpropanoate	Ethyl furylpropanoate	s-PNA	ethyl 3-(2-furyl)propanoate	CCOC(=O)CCC1=CC=CO1	InChI=1S/C9H12O3/c1-2-11-9(10)6-5-8-4-3-7-12-8/h3-4,7H,2,5-6H2,1H3	C9H12O3	168.19	1.499	6392.36	3.54093	72.43	1
91	Ethyl hexanoate	Ethyl hexanoate	STR-PNA	ethyl hexanoate	CCCCCC(=O)OCC	InChI=1S/C8H16O2/c1-3-5-6-7-8(9)10-4-2/h3-7H2,1-2H3	C8H16O2	144.211	2.405	5045.78	6.49627	45.858	0
92	Ethyl 5-hexenoate	Ethyl 5-hexenoate	s-PNA	ethyl hex-5-enoate	CCOC(=O)CCCC=C	InChI=1S/C8H14O2/c1-3-5-6-7-8(9)10-4-2/h3H,1,4-7H2,2H3	C8H14O2	142.196	2.014	5360.42	6.08063	47.572	0
93	Ethyl cis-3-hexenoate	Ethyl cis-3-hexenoate	s-PNA	ethyl (Z)-hex-3-enoate	CCOC(=O)C\\C=C/CC	InChI=1S/C8H14O2/c1-3-5-6-7-8(9)10-4-2/h5-6H,3-4,7H2,1-2H3/b6-5-	C8H14O2	142.196	1.96	5360.42	6.08063	45.858	0
94	Ethyl 2-hydroxy-2-methylbutyrate	Ethyl 2-hydroxy-2-methylbutyrate	s-CAR	ethyl 2-hydroxy-2-methyl-butanoate	CCOC(=O)C(C)(O)CC	InChI=1S/C7H14O3/c1-4-7(3,9)6(8)10-5-2/h9H,4-5H2,1-3H3/t7-/m0/s1	C7H14O3	146.184	1.017	4877.32	3.53287	78.39	0
95	Ethyl 5-hydroxyoctanoate	Ethyl 5-hydroxyoctanoate	s-PNA	ethyl 5-hydroxyoctanoate	CCCC(O)CCCC(=O)OCC	InChI=1S/C10H20O3/c1-3-6-9(11)7-5-8-10(12)13-4-2/h9,11H,3-8H2,1-2H3/t9-/m0/s1	C10H20O3	188.264	2.08	6417.1	7.94156	87	0
96	Ethyl isobutyrate	Ethyl isobutyrate	EXP	ethyl 2-methylpropanoate	CCOC(=O)C(C)C	InChI=1S/C6H12O2/c1-4-8-6(7)5(2)3/h5H,4H2,1-3H3	C6H12O2	116.158	1.499	4019.26	3.44283	39.429	0
97	Ethyl isohexanoate	Ethyl isohexanoate	s-PNA	ethyl 4-methylpentanoate	CCOC(=O)CCC(C)C	InChI=1S/C8H16O2/c1-4-10-8(9)6-5-7(2)3/h7H,4-6H2,1-3H3	C8H16O2	144.211	2.2	5045.78	5.21715	45.858	0
98	Ethyl levulinate propylene glycol ketal	Ethyl levulinate propylene glycol ketal	s-CAR	ethyl 3-(2,4-dimethyl-1,3-dioxolan-2-yl)propanoate	CCOC(=O)CCC1(C)OCC(C)O1	InChI=1S/C10H18O4/c1-4-12-9(11)5-6-10(3)13-7-8(2)14-10/h8H,4-7H2,1-3H3/t8-,10+/m0/s1	C10H18O4	202.248	0.62	6621.14	4.03961	84.002	1
99	Ethyl levulinate	Ethyl levulinate	s-CAR	ethyl 4-oxopentanoate	CCOC(=O)CCC(C)=O	InChI=1S/C7H12O3/c1-3-10-7(9)5-4-6(2)8/h3-5H2,1-2H3	C7H12O3	144.168	0.315	4986.66	4.75599	85.716	0
100	Ethyl maltol butyrate	Ethyl maltol butyrate	s-CAR	(2-ethyl-4-oxo-pyran-3-yl) butanoate	CCCC(=O)OC1=C(CC)OC=CC1=O	InChI=1S/C11H14O4/c1-3-5-10(13)15-11-8(12)6-7-14-9(11)4-2/h6-7H,3-5H2,1-2H3	C11H14O4	210.226	1.434	7873.02	4.39399	69.43	1
101	Ethyl maltol isobutyrate	Ethyl maltol isobutyrate	STR-CAR	(2-ethyl-4-oxo-pyran-3-yl) 2-methylpropanoate	CCC1=C(OC(=O)C(C)C)C(=O)C=CO1	InChI=1S/C11H14O4/c1-4-9-10(8(12)5-6-14-9)15-11(13)7(2)3/h5-7H,4H2,1-3H3	C11H14O4	210.226	1.44	7873.02	3.93756	67.287	1
102	Ethyl maltol propionate	Ethyl maltol propionate	STR-CAR	(2-ethyl-4-oxo-pyran-3-yl) propanoate	CCC(=O)OC1=C(CC)OC=CC1=O	InChI=1S/C10H12O4/c1-3-8-10(14-9(12)4-2)7(11)5-6-13-8/h5-6H,3-4H2,1-2H3	C10H12O4	196.2	0.978	7359.76	3.73425	72.859	1
103	Ethyl maltol	Ethyl maltol	s-CAR/t-CAR/EXP	2-ethyl-3-hydroxy-pyran-4-one	CCC1=C(O)C(=O)C=CO1	InChI=1S/C7H8O3/c1-2-6-7(9)5(8)3-4-10-6/h3-4,9H,2H2,1H3	C7H8O3	140.137	0.301	5365.84	1.98809	99.273	1
104	Ethyl methylbutyrate	Ethyl methylbutyrate	s-STR/t-STR	ethyl 2-methylbutanoate	CCOC(=O)C(C)CC	InChI=1S/C7H14O2/c1-4-6(3)7(8)9-5-2/h6H,4-5H2,1-3H3/t6-/m1/s1	C7H14O2	130.185	1.955	4532.52	4.31815	39.001	0
105	Ethyl methyldithiopropionate	Ethyl methyldithiopropionate	s-PNA	ethyl 2-(methyldisulfanyl)propanoate	CCOC(=O)C(C)SSC	InChI=1S/C6H12O2S2/c1-4-8-6(7)5(2)10-9-3/h5H,4H2,1-3H3/t5-/m0/s1	C6H12O2S2	180.288	1.925	7389.26	6.26716	105.828	0
106	Ethyl 2-methylpentanoate	Ethyl 2-methylpentanoate	s-PNA	ethyl 2-methylpentanoate	CCCC(C)C(=O)OCC	InChI=1S/C8H16O2/c1-4-6-7(3)8(9)10-5-2/h7H,4-6H2,1-3H3/t7-/m1/s1	C8H16O2	144.211	2.411	5045.78	5.21715	39.858	0
107	Ethyl 3-methylpentanoate	Ethyl 3-methylpentanoate	s-PNA/t-PNA	ethyl 3-methylpentanoate	CCOC(=O)CC(C)CC	InChI=1S/C8H16O2/c1-4-7(3)6-8(9)10-5-2/h7H,4-6H2,1-3H3/t7-/m1/s1	C8H16O2	144.211	2.2	5045.78	5.21715	38.572	0
108	Ethyl 2-methyl-4-pentenoate	Ethyl 2-methyl-4-pentenoate	s-PNA	ethyl 2-methylpent-4-enoate	CCOC(=O)C(C)CC=C	InChI=1S/C8H14O2/c1-4-6-7(3)8(9)10-5-2/h4,7H,1,5-6H2,2-3H3/t7-/m0/s1	C8H14O2	142.196	2.02	5360.42	4.852	36.429	0
109	Ethyl 4-methylpent-3-enoate	Ethyl 4-methylpent-3-enoate	s-STR/t-STR	ethyl 4-methylpent-3-enoate	CCOC(=O)CC=C(C)C	InChI=1S/C8H14O2/c1-4-10-8(9)6-5-7(2)3/h5H,4,6H2,1-3H3	C8H14O2	142.196	1.951	5360.42	4.852	46.715	0
110	Ethyl methylphenylglycidate	Ethyl methylphenylglycidate	s-STR/t-STR	ethyl 3-methyl-3-phenyl-oxirane-2-carboxylate	CCOC(=O)C1OC1(C)C2=CC=CC=C2	InChI=1S/C12H14O3/c1-3-14-11(13)10-12(2,15-10)9-7-5-4-6-8-9/h4-8,10H,3H2,1-2H3/t10-,12-/m0/s1	C12H14O3	206.238	1.877	8106.02	2.58718	65.573	2
111	Ethyl 2-nonenoate	Ethyl 2-nonenoate	s-PNA	ethyl (E)-non-2-enoate	CCCCCC\\C=C\\C(=O)OCC	InChI=1S/C11H20O2/c1-3-5-6-7-8-9-10-11(12)13-4-2/h9-10H,3-8H2,1-2H3/b10-9+	C11H20O2	184.275	3.75	6900.2	8.9996	50.572	0
112	Ethyl octadienoate	Ethyl octadienoate	s-PNA	ethyl (4Z)-octa-4,7-dienoate	CCOC(=O)CC\\C=C/CC=C	InChI=1S/C10H16O2/c1-3-5-6-7-8-9-10(11)12-4-2/h3,6-7H,1,4-5,8-9H2,2H3/b7-6-	C10H16O2	168.233	2.482	6701.58	7.60008	44.572	0
113	Ethyl cis-4-octenoate	Ethyl cis-4-octenoate	s-PNA	ethyl (Z)-oct-4-enoate	CCC\\C=C/CCC(=O)OCC	InChI=1S/C10H18O2/c1-3-5-6-7-8-9-10(11)12-4-2/h6-7H,3-5,8-9H2,1-2H3/b7-6-	C10H18O2	170.249	2.873	6386.94	8.02194	46.715	0
114	Ethyl trans-2-octenoate	Ethyl trans-2-octenoate	s-PNA	ethyl (E)-oct-2-enoate	CCCCC\\C=C\\C(=O)OCC	InChI=1S/C10H18O2/c1-3-5-6-7-8-9-10(11)12-4-2/h8-9H,3-7H2,1-2H3/b9-8+	C10H18O2	170.249	3.294	6386.94	8.02194	48.43	0
115	Ethyl trans-3-octenoate	Ethyl trans-3-octenoate	s-PNA	ethyl (E)-oct-3-enoate	CCCC\\C=C\\CC(=O)OCC	InChI=1S/C10H18O2/c1-3-5-6-7-8-9-10(11)12-4-2/h7-8H,3-6,9H2,1-2H3/b8-7+	C10H18O2	170.249	2.873	6386.94	8.02194	49.287	0
116	Ethyl oxohexanoate	Ethyl oxohexanoate	s-PNA	ethyl 3-oxohexanoate	CCCC(=O)CC(=O)OCC	InChI=1S/C8H14O3/c1-3-5-7(9)6-8(10)11-4-2/h3-6H2,1-2H3	C8H14O3	158.195	1.404	5499.92	5.65469	67.287	0
117	Ethyl phenylglycidate	Ethyl phenylglycidate	s-CAR	ethyl 3-phenyloxirane-2-carboxylate	CCOC(=O)C1OC1C2=CC=CC=C2	InChI=1S/C11H12O3/c1-2-13-11(12)10-9(14-10)8-6-4-3-5-7-8/h3-7,9-10H,2H2,1H3/t9-,10+/m1/s1	C11H12O3	192.211	1.672	7592.76	2.6101	64.287	2
118	Ethyl pyruvate	Ethyl pyruvate	s-CAR/t-CAR	ethyl 2-oxopropanoate	CCOC(=O)C(C)=O	InChI=1S/C5H8O3/c1-3-8-5(7)4(2)6/h3H2,1-2H3	C5H8O3	116.115	0.246	3960.14	3.03025	87.859	0
119	Ethyl senecioate	Ethyl senecioate	s-PNA	ethyl 3-methylbut-2-enoate	CCOC(=O)C=C(C)C	InChI=1S/C7H12O2/c1-4-9-7(8)5-6(2)3/h5H,4H2,1-3H3	C7H12O2	128.169	1.916	4847.16	3.96988	39.429	0
120	Ethyl tiglate	Ethyl tiglate	s-CAR	ethyl (E)-2-methylbut-2-enoate	CCOC(=O)\\C(C)=C\\C	InChI=1S/C7H12O2/c1-4-6(3)7(8)9-5-2/h4H,5H2,1-3H3/b6-4+	C7H12O2	128.169	1.916	4847.16	3.96988	39.858	0
121	Ethyl valerate	Ethyl valerate	s-PNA	ethyl pentanoate	CCCCC(=O)OCC	InChI=1S/C7H14O2/c1-3-5-6-7(8)9-4-2/h3-6H2,1-2H3	C7H14O2	130.185	1.949	4532.52	5.52421	45.858	0
122	Ethylbutyraldehyde	Ethylbutyraldehyde	s-CAR	2-ethylbutanal	CCC(CC)C=O	InChI=1S/C6H12O/c1-3-6(4-2)5-7/h5-6H,3-4H2,1-2H3	C6H12O	100.159	1.859	3674.46	3.66503	37.286	0
123	Ethylhydroxycyclopentenone	Ethylhydroxycyclopentenone	s-CAR	3-ethyl-2-hydroxy-cyclopent-2-en-1-one	CCC1=C(O)C(=O)CC1	InChI=1S/C7H10O2/c1-2-5-3-4-6(8)7(5)9/h9H,2-4H2,1H3	C7H10O2	126.153	1.199	4706.4	1.66798	80.415	1
124	3-Ethyl-4-methylcyclotene	3-Ethyl-4-methylcyclotene	s-CAR	3-ethyl-2-hydroxy-4-methyl-cyclopent-2-en-1-one	CCC1=C(O)C(=O)CC1C	InChI=1S/C8H12O2/c1-3-6-5(2)4-7(9)8(6)10/h5,10H,3-4H2,1-2H3/t5-/m1/s1	C8H12O2	140.18	1.451	5219.66	1.90155	82.441	1
125	5-Ethyl-3-methylcyclotene	5-Ethyl-3-methylcyclotene	s-CAR	5-ethyl-2-hydroxy-3-methyl-cyclopent-2-en-1-one	CCC1CC(=C(O)C1=O)C	InChI=1S/C8H12O2/c1-3-6-4-5(2)7(9)8(6)10/h6,9H,3-4H2,1-2H3/t6-/m0/s1	C8H12O2	140.18	1.662	5219.66	1.90155	78.662	1
126	2-Ethyl-4-hydroxy-5-methyl-3(2H)-furanone	2-Ethyl-4-hydroxy-5-methyl-3(2H)-furanone	s-CAR	2-ethyl-4-hydroxy-5-methyl-furan-3-one	CCC1OC(=C(O)C1=O)C	InChI=1S/C7H10O3/c1-3-5-7(9)6(8)4(2)10-5/h5,8H,3H2,1-2H3/t5-/m0/s1	C7H10O3	142.152	0.637	5051.2	1.87327	100.988	1
127	Ethylthiophenecarbaldehyde	Ethylthiophenecarbaldehyde	s-CAR	5-ethylthiophene-2-carbaldehyde	CCC1=CC=C(S1)C=O	InChI=1S/C7H8OS/c1-2-6-3-4-7(5-8)9-6/h3-5H,2H2,1H3	C7H8OS	140.203	2.264	6361.24	2.00519	91.496	1
128	Fraistone	Fraistone	s-STR/t-STR	ethyl 2-(2,4-dimethyl-1,3-dioxolan-2-yl)acetate	CCOC(=O)CC1(C)OCC(C)O1	InChI=1S/C9H16O4/c1-4-11-8(10)5-9(3)12-6-7(2)13-9/h7H,4-6H2,1-3H3/t7-,9-/m1/s1	C9H16O4	188.221	0.558	6107.88	3.41279	72.43	1
129	Furaneol butyrate	Furaneol butyrate	STR-CAR	2,5-dimethyl-4-oxo-3-furyl] butanoate	CCCC(=O)OC1=C(C)OC(C)C1=O	InChI=1S/C10H14O4/c1-4-5-8(11)14-10-7(3)13-6(2)9(10)12/h6H,4-5H2,1-3H3/t6-/m0/s1	C10H14O4	198.216	1.246	7045.12	3.54578	111.003	1
130	Furfural	Furfural	s-CAR	furan-2-carbaldehyde	O=CC1=CC=CO1	InChI=1S/C5H4O2/c6-4-5-2-1-3-7-5/h1-4H	C5H4O2	96.0841	0.984	3994.52	0.94064	72.002	1
131	Furfuryl mercaptan	Furfuryl mercaptan	s-CAR	2-furylmethanethiol	SCC1=CC=CO1	InChI=1S/C5H6OS/c7-4-5-2-1-3-6-5/h1-3,7H,4H2	C5H6OS	114.166	1.378	5225.38	1.41588	96.231	1
132	alpha-Furfuryl pentanoate	alpha-Furfuryl pentanoate	CAR-PNA	2-furylmethyl pentanoate	CCCCC(=O)OCC1=CC=CO1	InChI=1S/C10H14O3/c1-2-3-6-10(11)13-8-9-5-4-7-12-9/h4-5,7H,2-3,6,8H2,1H3	C10H14O3	182.216	2.365	6905.62	4.25708	69.43	1
133	Furfurylidenebutyraldehyde	Furfurylidenebutyraldehyde	s-CAR	(2E)-2-(2-furylmethylene)butanal	CC\\C(C=O)=C/C1=CC=CO1	InChI=1S/C9H10O2/c1-2-8(7-10)6-9-4-3-5-11-9/h3-7H,2H2,1H3/b8-6+	C9H10O2	150.174	2.247	6362.2	2.66419	70.287	1
134	Furylbutanone	Furylbutanone	s-CAR	4-(2-furyl)butan-2-one	CC(=O)CCC1=CC=CO1	InChI=1S/C8H10O2/c1-7(9)4-5-8-3-2-6-10-8/h2-3,6H,4-5H2,1H3	C8H10O2	138.164	1.025	5534.3	2.26162	66.43	1
135	Furylmethylketone	Furylmethylketone	s-CAR	1-(2-furyl)ethanone	CC(=O)C1=CC=CO1	InChI=1S/C6H6O2/c1-5(7)6-3-2-4-8-6/h2-4H,1H3	C6H6O2	110.111	0.965	4507.78	1.15888	60.001	1
136	Furylpropanone	Furylpropanone	s-CAR	1-(2-furyl)propan-2-one	CC(=O)CC1=CC=CO1	InChI=1S/C7H8O2/c1-6(8)5-7-3-2-4-9-7/h2-4H,5H2,1H3	C7H8O2	124.137	0.99	5021.04	1.67777	59.144	1
137	Geranyl hexanoate	Geranyl hexanoate	s-PNA	[(2E)-3,7-dimethylocta-2,6-dienyl] hexanoate	CCCCCC(=O)OC\\C=C(/C)CCC=C(C)C	InChI=1S/C16H28O2/c1-5-6-7-11-16(17)18-13-12-15(4)10-8-9-14(2)3/h9,12H,5-8,10-11,13H2,1-4H3/b15-12+	C16H28O2	252.392	5.348	9781.14	10.6602	48.001	0
138	Geranyl valerate	Geranyl valerate	s-PNA	[(2E)-3,7-dimethylocta-2,6-dienyl] pentanoate	CCCCC(=O)OC\\C=C(/C)CCC=C(C)C	InChI=1S/C15H26O2/c1-5-6-10-15(16)17-12-11-14(4)9-7-8-13(2)3/h8,11H,5-7,9-10,12H2,1-4H3/b14-11+	C15H26O2	238.366	4.892	9267.88	9.73789	44.572	0
139	trans-2-Heptenoic acid	trans-2-Heptenoic acid	s-CAR	(E)-hept-2-enoic acid	CCCC\\C=C\\C(O)=O	InChI=1S/C7H12O2/c1-2-3-4-5-6-7(8)9/h5-6H,2-4H2,1H3,(H,8,9)/b6-5+	C7H12O2	128.169	2.263	4847.16	5.12028	100.752	0
140	trans-2-Heptenyl acetate	trans-2-Heptenyl acetate	s-PNA	[(E)-hept-2-enyl] acetate	CCCC/C=C/COC(C)=O	InChI=1S/C9H16O2/c1-3-4-5-6-7-8-11-9(2)10/h6-7H,3-5,8H2,1-2H3/b7-6+	C9H16O2	156.222	2.408	5873.68	7.04851	54.858	0
141	Hexadienyl acetate	Hexadienyl acetate	s-PNA	[(2E,4E)-hexa-2,4-dienyl] acetate	C\\C=C\\C=C\\COC(C)=O	InChI=1S/C8H12O2/c1-3-4-5-6-7-10-8(2)9/h3-6H,7H2,1-2H3/b4-3+,6-5+	C8H12O2	140.18	1.507	5675.06	5.67853	55.715	0
142	Hexadienyl isobutyrate	Hexadienyl isobutyrate	s-PNA	[(2E,4E)-hexa-2,4-dienyl] 2-methylpropanoate	C/C=C/C=C/COC(=O)C(C)C	InChI=1S/C10H16O2/c1-4-5-6-7-8-12-10(11)9(2)3/h4-7,9H,8H2,1-3H3/b5-4+,7-6+	C10H16O2	168.233	2.637	6701.58	6.2935	41.144	0
143	Hexadienyl propionate	Hexadienyl propionate	s-PNA	[(2E,4E)-hexa-2,4-dienyl] propanoate	CCC(=O)OC\\C=C\\C=C\\C	InChI=1S/C9H14O2/c1-3-5-6-7-8-11-9(10)4-2/h3,5-7H,4,8H2,1-2H3/b5-3+,7-6+	C9H14O2	154.206	2.174	6188.32	6.63562	44.572	0
144	Hexenolactone	Hexenolactone	s-CAR	2-ethyl-2H-furan-5-one	CCC1OC(=O)C=C1	InChI=1S/C6H8O2/c1-2-5-3-4-6(7)8-5/h3-5H,2H2,1H3/t5-/m1/s1	C6H8O2	112.127	1.289	4193.14	1.43989	76.716	1
145	5-Hexenyl butyrate	5-Hexenyl butyrate	s-PNA/t-PNA	hex-5-enyl butanoate	CCCC(=O)OCCCCC=C	InChI=1S/C10H18O2/c1-3-5-6-7-9-12-10(11)8-4-2/h3H,1,4-9H2,2H3	C10H18O2	170.249	2.994	6386.94	8.02194	45.858	0
146	Hexenyl furoate	Hexenyl furoate	s-CAR	[(E)-hex-3-enyl] furan-2-carboxylate	CC/C=C/CCOC(=O)C1=CC=CO1	InChI=1S/C11H14O3/c1-2-3-4-5-8-14-11(12)10-7-6-9-13-10/h3-4,6-7,9H,2,5,8H2,1H3/b4-3+	C11H14O3	194.227	2.877	7733.52	4.71827	69.43	1
147	cis-3-Hexenyl trans-2-hexenoate	cis-3-Hexenyl trans-2-hexenoate	s-PNA	[(Z)-hex-3-enyl] (E)-hex-2-enoate	CCC\\C=C\\C(=O)OCC\\C=C/CC	InChI=1S/C12H20O2/c1-3-5-7-9-11-14-12(13)10-8-6-4-2/h5,7-8,10H,3-4,6,9,11H2,1-2H3/b7-5-,10-8+	C12H20O2	196.286	3.829	7728.1	9.54461	48.001	0
148	5-Hexenyl isobutyrate	5-Hexenyl isobutyrate	s-PNA	hex-5-enyl 2-methylpropanoate	CC(C)C(=O)OCCCCC=C	InChI=1S/C10H18O2/c1-4-5-6-7-8-12-10(11)9(2)3/h4,9H,1,5-8H2,2-3H3	C10H18O2	170.249	3	6386.94	6.67292	39.429	0
149	Hexenyl levulinate	Hexenyl levulinate	s-CAR	[(Z)-hex-3-enyl] 4-oxopentanoate	CC\\C=C/CCOC(=O)CCC(C)=O	InChI=1S/C11H18O3/c1-3-4-5-6-9-14-11(13)8-7-10(2)12/h4-5H,3,6-9H2,1-2H3/b5-4-	C11H18O3	198.259	1.763	7354.34	8.0382	93.86	0
150	cis-3-Hexenyl 2-methylbutanoate	cis-3-Hexenyl 2-methylbutanoate	s-PNA	[(Z)-hex-3-enyl] 2-methylbutanoate	CC\\C=C/CCOC(=O)C(C)CC	InChI=1S/C11H20O2/c1-4-6-7-8-9-13-11(12)10(3)5-2/h6-7,10H,4-5,8-9H2,1-3H3/b7-6-/t10-/m1/s1	C11H20O2	184.275	3.403	6900.2	7.60334	40.286	0
151	Hexenyl pyruvate	Hexenyl pyruvate	s-CAR	[(Z)-hex-3-enyl] 2-oxopropanoate	CC\\C=C/CCOC(=O)C(C)=O	InChI=1S/C9H14O3/c1-3-4-5-6-7-12-9(11)8(2)10/h4-5H,3,6-7H2,1-2H3/b5-4-	C9H14O3	170.206	1.693	6327.82	6.19327	87.431	0
152	(E)-2-Hexenyl valerate	(E)-2-Hexenyl valerate	s-PNA	[(E)-hex-2-enyl] pentanoate	CCCCC(=O)OC\\C=C\\CCC	InChI=1S/C11H20O2/c1-3-5-7-8-10-13-11(12)9-6-4-2/h7-8H,3-6,9-10H2,1-2H3/b8-7+	C11H20O2	184.275	3.531	6900.2	8.9996	46.287	0
153	Hexyl 2-crotonate	Hexyl 2-crotonate	s-PNA	hexyl (E)-but-2-enoate	CCCCCCOC(=O)\\C=C\\C	InChI=1S/C10H18O2/c1-3-5-6-7-9-12-10(11)8-4-2/h4,8H,3,5-7,9H2,1-2H3/b8-4+	C10H18O2	170.249	3.362	6386.94	8.02194	47.572	0
154	Hexyl levulinate	Hexyl levulinate	s-CAR	hexyl 4-oxopentanoate	CCCCCCOC(=O)CCC(C)=O	InChI=1S/C11H20O3/c1-3-4-5-6-9-14-11(13)8-7-10(2)12/h3-9H2,1-2H3	C11H20O3	200.275	2.208	7039.7	8.43494	84.002	0
155	Hydroxybutanoic acid lactone	Hydroxybutanoic acid lactone	s-CAR	tetrahydrofuran-2-one	O=C1CCCO1	InChI=1S/C4H6O2/c5-4-2-1-3-6-4/h1-3H2	C4H6O2	86.0892	0.276	2851.98	0.88078	78.859	1
156	1-Hydroxy-2-butanone	1-Hydroxy-2-butanone	s-CAR	1-hydroxybutan-2-one	CCC(=O)CO	InChI=1S/C4H8O2/c1-2-4(6)3-5/h5H,2-3H2,1H3	C4H8O2	88.1051	-0.11	2992.74	2.67048	88.479	0
157	4-Hydroxybutan-2-one	4-Hydroxybutan-2-one	s-CAR	4-hydroxybutan-2-one	CC(=O)CCO	InChI=1S/C4H8O2/c1-4(6)2-3-5/h5H,2-3H2,1H3	C4H8O2	88.1051	-0.528	2992.74	2.67048	98.96	0
158	Hydroxycyclohexenone	Hydroxycyclohexenone	s-CAR	cyclohexane-1,2-dione	O=C1CCCCC1=O	InChI=1S/C6H8O2/c7-5-3-1-2-4-6(5)8/h1-4H2	C6H8O2	112.127	0.734	3987.84	1.41863	90.431	1
159	Hydroxydimethyloctanoic acid lactone	Hydroxydimethyloctanoic acid lactone	s-CAR	(4S,7R)-7-isopropyl-4-methyl-oxepan-2-one	CC(C)[C@H]1CC[C@H](C)CC(=O)O1	InChI=1S/C10H18O2/c1-7(2)9-5-4-8(3)6-10(11)12-9/h7-9H,4-6H2,1-3H3/t8-,9+/m0/s1	C10H18O2	170.249	2.661	5931.54	3.26718	50.572	1
160	Hydroxyhexanone	Hydroxyhexanone	s-CAR	4-hydroxyhexan-3-one	CCC(O)C(=O)CC	InChI=1S/C6H12O2/c1-3-5(7)6(8)4-2/h5,7H,3-4H2,1-2H3/t5-/m1/s1	C6H12O2	116.158	0.898	4019.26	3.44283	70.246	0
161	Hydroxyisophorone	Hydroxyisophorone	s-CAR	2-hydroxy-3,5,5-trimethyl-cyclohex-2-en-1-one	CC1=C(O)C(=O)CC(C)(C)C1	InChI=1S/C9H14O2/c1-6-4-9(2,3)5-7(10)8(6)11/h11H,4-5H2,1-3H3	C9H14O2	154.206	1.657	5732.92	1.88538	85.558	1
162	Hydroxymethylbenzaldehyde	Hydroxymethylbenzaldehyde	s-CAR	2-hydroxy-4-methyl-benzaldehyde	CC1=CC(=C(C=O)C=C1)O	InChI=1S/C8H8O2/c1-6-2-3-7(5-9)8(10)4-6/h2-5,10H,1H3	C8H8O2	136.148	1.833	5848.94	1.82646	93.546	1
163	Hydroxymethylfuranone	Hydroxymethylfuranone	STR-CAR	4-hydroxy-5-methyl-furan-3-one	CC1=C(O)C(=O)CO1	InChI=1S/C5H6O3/c1-3-5(7)4(6)2-8-3/h7H,2H2,1H3	C5H6O3	114.099	-0.371	4024.68	1.15151	118.092	1
164	Hydroxymethylthienylethanone	Hydroxymethylthienylethanone	s-CAR	1-[3-(hydroxymethyl)-2-thienyl]ethanone	CC(=O)C1=C(CO)C=CS1	InChI=1S/C7H8O2S/c1-5(9)7-6(4-8)2-3-10-7/h2-3,8H,4H2,1H3	C7H8O2S	156.202	0.691	6706.04	2.18945	132.504	1
165	3-Hydroxy-2-pentanone	3-Hydroxy-2-pentanone	s-CAR	3-hydroxypentan-2-one	CCC(O)C(C)=O	InChI=1S/C5H10O2/c1-3-5(7)4(2)6/h5,7H,3H2,1-2H3/t5-/m1/s1	C5H10O2	102.132	0.231	3506	2.60051	78.779	0
166	Hydroxyphenylbutanone	Hydroxyphenylbutanone	s-CAR	4-(3-hydroxyphenyl)butan-2-one	CC(=O)CCC1=CC(=CC=C1)O	InChI=1S/C10H12O2/c1-8(11)5-6-9-3-2-4-10(12)7-9/h2-4,7,12H,5-6H2,1H3	C10H12O2	164.201	1.809	6875.46	2.99698	96.35	1
167	Isoamyl furanpropionate	Isoamyl furanpropionate	s-CAR	isopentyl 3-(2-furyl)propanoate	CC(C)CCOC(=O)CCC1=CC=CO1	InChI=1S/C12H18O3/c1-10(2)7-9-15-12(13)6-5-11-4-3-8-14-11/h3-4,8,10H,5-7,9H2,1-2H3	C12H18O3	210.27	2.73	7932.14	5.1156	75.43	1
168	Isoamyl hexanoate	Isoamyl hexanoate	s-PNA	isopentyl hexanoate	CCCCCC(=O)OCCC(C)C	InChI=1S/C11H22O2/c1-4-5-6-7-11(12)13-9-8-10(2)3/h10H,4-9H2,1-3H3	C11H22O2	186.291	3.637	6585.56	8.00386	47.572	0
169	Isoamyl isovalerate	Isoamyl isovalerate	s-PNA	isopentyl 3-methylbutanoate	CC(C)CCOC(=O)CC(C)C	InChI=1S/C10H20O2/c1-8(2)5-6-12-10(11)7-9(3)4/h8-9H,5-7H2,1-4H3	C10H20O2	172.265	2.976	6072.3	5.98932	39.858	0
170	Isoamyl lactate	Isoamyl lactate	s-CAR	isopentyl 2-hydroxypropanoate	CC(C)CCOC(=O)C(C)O	InChI=1S/C8H16O3/c1-6(2)4-5-11-8(10)7(3)9/h6-7,9H,4-5H2,1-3H3/t7-/m0/s1	C8H16O3	160.211	1.413	5390.58	5.07155	95.337	0
171	Isoamyl levulinate	Isoamyl levulinate	s-CAR	isopentyl 4-oxopentanoate	CC(C)CCOC(=O)CCC(C)=O	InChI=1S/C10H18O3/c1-8(2)6-7-13-10(12)5-4-9(3)11/h8H,4-7H2,1-3H3	C10H18O3	186.248	1.547	6526.44	6.41226	86.574	0
172	Isoamyl octanoate	Isoamyl octanoate	s-PNA	isopentyl octanoate	CCCCCCCC(=O)OCCC(C)C	InChI=1S/C13H26O2/c1-4-5-6-7-8-9-13(14)15-11-10-12(2)3/h12H,4-11H2,1-3H3	C13H26O2	214.344	4.549	7612.08	9.90756	47.144	0
173	Isoamyl propionate	Isoamyl propionate	s-PNA	isopentyl propanoate	CCC(=O)OCCC(C)C	InChI=1S/C8H16O2/c1-4-8(9)10-6-5-7(2)3/h7H,4-6H2,1-3H3	C8H16O2	144.211	2.268	5045.78	5.21715	45.001	0
174	Isoamyl pyruvate	Isoamyl pyruvate	s-CAR	isopentyl 2-oxopropanoate	CC(C)CCOC(=O)C(C)=O	InChI=1S/C8H14O3/c1-6(2)4-5-11-8(10)7(3)9/h6H,4-5H2,1-3H3	C8H14O3	158.195	1.477	5499.92	4.69814	87.859	0
175	Isobutyl acetate	Isobutyl acetate	s-PNA	isobutyl acetate	CC(C)COC(C)=O	InChI=1S/C6H12O2/c1-5(2)4-8-6(3)7/h5H,4H2,1-3H3	C6H12O2	116.158	1.212	4019.26	3.44283	59.144	0
176	Isobutyl crotonate	Isobutyl crotonate	s-PNA	isobutyl (E)-but-2-enoate	C\\C=C\\C(=O)OCC(C)C	InChI=1S/C8H14O2/c1-4-5-8(9)10-6-7(2)3/h4-5,7H,6H2,1-3H3/b5-4+	C8H14O2	142.196	2.312	5360.42	4.852	42.001	0
177	Isobutyl butyrate	Isobutyl butyrate	s-PNA	isobutyl butanoate	CCCC(=O)OCC(C)C	InChI=1S/C8H16O2/c1-4-5-8(9)10-6-7(2)3/h7H,4-6H2,1-3H3	C8H16O2	144.211	2.335	5045.78	5.21715	40.286	0
178a	isobutyl (E)-dec-4-enoate	Isobutyl decenoate	s-PNA	isobutyl (E)-dec-4-enoate	CCCCC\C=C\CCC(=O)OCC(C)C	InChI=1S/C14H26O2/c1-4-5-6-7-8-9-10-11-14(15)16-12-13(2)3/h8-9,13H,4-7,10-12H2,1-3H3/b9-8+	C14H26O2	226.355	4.628	8439.98	10.4454	39.001	0
178b	isobutyl (Z)-dec-4-enoate	Isobutyl decenoate	s-PNA	isobutyl (Z)-dec-4-enoate	CCCCC\C=C/CCC(=O)OCC(C)C	InChI=1S/C14H26O2/c1-4-5-6-7-8-9-10-11-14(15)16-12-13(2)3/h8-9,13H,4-7,10-12H2,1-3H3/b9-8-	C14H26O2	226.355	4.628	8439.98	10.4454	40.715	0
179	Isobutyl furanpropionate	Isobutyl furanpropionate	s-PNA	isobutyl 3-(2-furyl)propanoate	CC(C)COC(=O)CCC1=CC=CO1	InChI=1S/C11H16O3/c1-9(2)8-14-11(12)6-5-10-4-3-7-13-10/h3-4,7,9H,5-6,8H2,1-2H3	C11H16O3	196.243	2.342	7418.88	4.39531	63.001	1
180	Isobutyl hexanoate	Isobutyl hexanoate	s-PNA	isobutyl hexanoate	CCCCCC(=O)OCC(C)C	InChI=1S/C10H20O2/c1-4-5-6-7-10(11)12-8-9(2)3/h9H,4-8H2,1-3H3	C10H20O2	172.265	3.248	6072.3	7.06358	37.286	0
181	Isobutyl isobutyrate	Isobutyl isobutyrate	s-PNA	isobutyl 2-methylpropanoate	CC(C)COC(=O)C(C)C	InChI=1S/C8H16O2/c1-6(2)5-10-8(9)7(3)4/h6-7H,5H2,1-4H3	C8H16O2	144.211	2.342	5045.78	4.28173	34.286	0
182	Isobutyl lactate	Isobutyl lactate	s-CAR	isobutyl 2-hydroxypropanoate	CC(C)COC(=O)C(C)O	InChI=1S/C7H14O3/c1-5(2)4-10-7(9)6(3)8/h5-6,8H,4H2,1-3H3/t6-/m1/s1	C7H14O3	146.184	1.025	4877.32	4.23158	88.051	0
183	Isobutyl levulinate	Isobutyl levulinate	s-CAR	isobutyl 4-oxopentanoate	CC(C)COC(=O)CCC(C)=O	InChI=1S/C9H16O3/c1-7(2)6-12-9(11)5-4-8(3)10/h7H,4-6H2,1-3H3	C9H16O3	172.222	1.158	6013.18	5.54485	79.288	0
184	Isobutyl methylthiobutyrate	Isobutyl methylthiobutyrate	s-STR	isobutyl 3-methylsulfanylbutanoate	CSC(C)CC(=O)OCC(C)C	InChI=1S/C9H18O2S/c1-7(2)6-11-9(10)5-8(3)12-4/h7-8H,5-6H2,1-4H3/t8-/m0/s1	C9H18O2S	190.303	2.319	7244.04	6.48021	61.911	0
185	Isobutyl pivalate	Isobutyl pivalate	s-PNA	isobutyl 2,2-dimethylpropanoate	CC(C)COC(=O)C(C)(C)C	InChI=1S/C9H18O2/c1-7(2)6-11-8(10)9(3,4)5/h7H,6H2,1-5H3	C9H18O2	158.238	2.759	5559.04	3.73075	32.572	0
186	Isopentyl methylthiopropionate	Isopentyl methylthiopropionate	s-PNA	pentyl 3-methylsulfanylpropanoate	CCCCCOC(=O)CCSC	InChI=1S/C9H18O2S/c1-3-4-5-7-11-9(10)6-8-12-2/h3-8H2,1-2H3	C9H18O2S	190.303	2.535	7244.04	9.05595	87.208	0
187	Isoprenyl hexanoate	Isoprenyl hexanoate	s-PNA	3-methylbut-3-enyl hexanoate	CCCCCC(=O)OCCC(C)=C	InChI=1S/C11H20O2/c1-4-5-6-7-11(12)13-9-8-10(2)3/h2,4-9H2,1,3H3	C11H20O2	184.275	3.44	6900.2	7.60334	43.287	0
188	Isopropyl acetoacetate	Isopropyl acetoacetate	s-CAR	isopropyl 3-oxobutanoate	CC(C)OC(=O)CC(C)=O	InChI=1S/C7H12O3/c1-5(2)10-7(9)4-6(3)8/h5H,4H2,1-3H3	C7H12O3	144.168	0.658	4986.66	3.87732	70.287	0
189	Isopropyl butyrate	Isopropyl butyrate	STR-PNA	isopropyl butanoate	CCCC(=O)OC(C)C	InChI=1S/C7H14O2/c1-4-5-7(8)9-6(2)3/h6H,4-5H2,1-3H3	C7H14O2	130.185	1.87	4532.52	4.31815	37.286	0
190	Isopropyl hexanoate	Isopropyl hexanoate	s-PNA/t-PNA	isopropyl hexanoate	CCCCCC(=O)OC(C)C	InChI=1S/C9H18O2/c1-4-5-6-7-9(10)11-8(2)3/h8H,4-7H2,1-3H3	C9H18O2	158.238	2.782	5559.04	6.13369	35.572	0
191	Isopropyl isobutyrate	Isopropyl isobutyrate	s-PNA	isopropyl 2-methylpropanoate	CC(C)OC(=O)C(C)C	InChI=1S/C7H14O2/c1-5(2)7(8)9-6(3)4/h5-6H,1-4H3	C7H14O2	130.185	1.876	4532.52	3.4679	30.858	0
192	Isopropyl isohexanoate	Isopropyl isohexanoate	s-PNA	isopropyl 4-methylpentanoate	CC(C)CCC(=O)OC(C)C	InChI=1S/C9H18O2/c1-7(2)5-6-9(10)11-8(3)4/h7-8H,5-6H2,1-4H3	C9H18O2	158.238	2.578	5559.04	5.12423	37.715	0
193	Isopropyl isovalerate	Isopropyl isovalerate	s-PNA	isopropyl 3-methylbutanoate	CC(C)CC(=O)OC(C)C	InChI=1S/C8H16O2/c1-6(2)5-8(9)10-7(3)4/h6-7H,5H2,1-4H3	C8H16O2	144.211	2.122	5045.78	4.28173	33.429	0
194	Isopropyl lactate	Isopropyl lactate	s-CAR	isopropyl 2-hydroxypropanoate	CC(C)OC(=O)C(C)O	InChI=1S/C6H12O3/c1-4(2)9-6(8)5(3)7/h4-5,7H,1-3H3/t5-/m0/s1	C6H12O3	132.158	0.559	4364.06	3.42078	81.273	0
195	Isopropyl methylbutyrate	Isopropyl methylbutyrate	s-PNA	isopropyl 2-methylbutanoate	CCC(C)C(=O)OC(C)C	InChI=1S/C8H16O2/c1-5-7(4)8(9)10-6(2)3/h6-7H,5H2,1-4H3/t7-/m0/s1	C8H16O2	144.211	2.332	5045.78	4.28173	32.143	0
196	Levulinic acid	Levulinic acid	s-CAR	4-oxopentanoic acid	CC(=O)CCC(O)=O	InChI=1S/C5H8O3/c1-4(6)2-3-5(7)8/h2-3H2,1H3,(H,7,8)	C5H8O3	116.115	-0.259	3960.14	3.03025	135.624	0
197	Maltol Propionate	Maltol Propionate	STR-CAR	(2-methyl-4-oxo-pyran-3-yl) propanoate	CCC(=O)OC1=C(C)OC=CC1=O	InChI=1S/C9H10O4/c1-3-8(11)13-9-6(2)12-5-4-7(9)10/h4-5H,3H2,1-2H3	C9H10O4	182.173	0.454	6846.5	3.1082	72.002	1
198	Maltol butyrate	Maltol butyrate	s-CAR	(2-methyl-4-oxo-pyran-3-yl) butanoate	CCCC(=O)OC1=C(C)OC=CC1=O	InChI=1S/C10H12O4/c1-3-4-9(12)14-10-7(2)13-6-5-8(10)11/h5-6H,3-4H2,1-2H3	C10H12O4	196.2	0.911	7359.76	3.73425	83.145	1
199	Maltyl 2-methylpropanoate	Maltyl 2-methylpropanoate	STR-CAR	(2-methyl-4-oxo-pyran-3-yl) 2-methylpropanoate	CC(C)C(=O)OC1=C(C)OC=CC1=O	InChI=1S/C10H12O4/c1-6(2)10(12)14-9-7(3)13-5-4-8(9)11/h4-6H,1-3H3	C10H12O4	196.2	0.917	7359.76	3.32512	79.716	1
200	Maltol	Maltol	STR-CAR	3-hydroxy-2-methyl-pyran-4-one	CC1=C(O)C(=O)C=CO1	InChI=1S/C6H6O3/c1-4-6(8)5(7)2-3-9-4/h2-3,8H,1H3	C6H6O3	126.11	-0.222	4852.58	1.46293	109.521	1
201	Maple furanone	Maple furanone	s-CAR	2-ethyl-4-hydroxy-3-methyl-2H-furan-5-one	CCC1OC(=O)C(=C1C)O	InChI=1S/C7H10O3/c1-3-5-4(2)6(8)7(9)10-5/h5,8H,3H2,1-2H3/t5-/m1/s1	C7H10O3	142.152	1.198	5051.2	1.87327	113.611	1
202	Methionyl butyrate	Methionyl butyrate	s-PNA	3-methylsulfanylpropyl butanoate	CCCC(=O)OCCCSC	InChI=1S/C8H16O2S/c1-3-5-8(9)10-6-4-7-11-2/h3-7H2,1-2H3	C8H16O2S	176.276	1.82	6730.78	8.0655	84.891	0
203	Methoxyphenylpentenone	Methoxyphenylpentenone	s-CAR	(E)-1-(4-methoxyphenyl)pent-1-en-3-one	CCC(=O)\\C=C\\C1=CC=C(OC)C=C1	InChI=1S/C12H14O2/c1-3-11(13)7-4-10-5-8-12(14-2)9-6-10/h4-9H,3H2,1-2H3/b7-4+	C12H14O2	190.238	2.678	8216.62	4.07564	56.573	1
204	Methoxystyryl isopropyl ketone	Methoxystyryl isopropyl ketone	s-CAR	(E)-1-(4-methoxyphenyl)-4-methyl-pent-1-en-3-one	COC1=CC=C(\\C=C\\C(=O)C(C)C)C=C1	InChI=1S/C13H16O2/c1-10(2)13(14)9-6-11-4-7-12(15-3)8-5-11/h4-10H,1-3H3/b9-6+	C13H16O2	204.265	3.141	8729.88	4.25012	54.858	1
205	Methyl acetoxybutyrate	Methyl acetoxybutyrate	s-PNA	methyl 3-acetoxybutanoate	COC(=O)CC(C)OC(=O)C	InChI=1S/C7H12O4/c1-5(11-6(2)8)4-7(9)10-3/h5H,4H2,1-3H3/t5-/m1/s1	C7H12O4	160.168	0.353	5331.46	4.64781	88.288	0
206	Methyl 5-acetoxyhexanoate	Methyl 5-acetoxyhexanoate	s-PNA	methyl 5-acetoxyhexanoate	COC(=O)CCCC(C)OC(C)=O	InChI=1S/C9H16O4/c1-7(13-8(2)10)5-4-6-9(11)12-3/h7H,4-6H2,1-3H3/t7-/m0/s1	C9H16O4	188.221	1.131	6357.98	6.3576	100.288	0
207	Methyl acetoxymethylbutyrate	Methyl acetoxymethylbutyrate	s-PNA	methyl 3-acetoxy-2-methyl-butanoate	COC(=O)C(C)C(C)OC(C)=O	InChI=1S/C8H14O4/c1-5(8(10)11-4)6(2)12-7(3)9/h5-6H,1-4H3/t5-,6+/m0/s1	C8H14O4	174.194	0.816	5844.72	4.69504	75.002	0
208	Methyl furoate	Methyl furoate	s-CAR	methyl furan-2-carboxylate	COC(=O)C1=CC=CO1	InChI=1S/C6H6O3/c1-8-6(7)5-3-2-4-9-5/h2-4H,1H3	C6H6O3	126.11	1.08	4852.58	1.64832	79.716	1
209	Methyl 2-hydroxyacetate	Methyl 2-hydroxyacetate	s-CAR	methyl 2-hydroxyacetate	COC(=O)CO	InChI=1S/C3H6O3/c1-6-3(5)2-4/h4H,2H2,1H3	C3H6O3	90.0779	-0.651	2824.28	2.61599	106.091	0
210	Methyl hexanethioate	Methyl hexanethioate	s-PNA	S-methyl hexanethioate	CCCCCC(=O)SC	InChI=1S/C7H14OS/c1-3-4-5-6-7(8)9-2/h3-6H2,1-2H3	C7H14OS	146.25	2.614	5872.72	5.9432	74.781	0
211	Methyl hexanoate	Methyl hexanoate	s-PNA	methyl hexanoate	CCCCCC(=O)OC	InChI=1S/C7H14O2/c1-3-4-5-6-7(8)9-2/h3-6H2,1-2H3	C7H14O2	130.185	2.056	4532.52	5.52421	51.858	0
212	Methyl trans-3-hexenoate	Methyl trans-3-hexenoate	s-PNA	methyl (E)-hex-3-enoate	CC/C=C/CC(=O)OC	InChI=1S/C7H12O2/c1-3-4-5-6-7(8)9-2/h4-5H,3,6H2,1-2H3/b5-4+	C7H12O2	128.169	1.612	4847.16	5.12028	53.144	0
213	Methyl cis-3-hexenoate	Methyl cis-3-hexenoate	s-PNA/t-PNA	methyl (Z)-hex-3-enoate	CC\\C=C/CC(=O)OC	InChI=1S/C7H12O2/c1-3-4-5-6-7(8)9-2/h4-5H,3,6H2,1-2H3/b5-4-	C7H12O2	128.169	1.612	4847.16	5.12028	53.144	0
214	Methyl hydroxydecanoate	Methyl hydroxydecanoate	s-PNA/t-PNA	methyl 5-hydroxydecanoate	CCCCCC(O)CCCC(=O)OC	InChI=1S/C11H22O3/c1-3-4-5-7-10(12)8-6-9-11(13)14-2/h10,12H,3-9H2,1-2H3/t10-/m0/s1	C11H22O3	202.291	2.644	6930.36	8.88883	89.221	0
215	Methyl isobutyrate	Methyl isobutyrate	s-PNA	methyl 2-methylpropanoate	COC(=O)C(C)C	InChI=1S/C5H10O2/c1-4(2)5(6)7-3/h4H,1-3H3	C5H10O2	102.132	1.15	3506	2.60051	45.429	0
216	Methyl isovalerate	Methyl isovalerate	s-PNA	methyl 3-methylbutanoate	COC(=O)CC(C)C	InChI=1S/C6H12O2/c1-5(2)4-6(7)8-3/h5H,4H2,1-3H3	C6H12O2	116.158	1.396	4019.26	3.44283	46.715	0
217	Methyl lactate	Methyl lactate	s-CAR	methyl 2-hydroxypropanoate	COC(=O)C(C)O	InChI=1S/C4H8O3/c1-3(5)4(6)7-2/h3,5H,1-2H3/t3-/m1/s1	C4H8O3	104.105	-0.167	3337.54	2.55301	95.182	0
218	Methyl levulinate	Methyl levulinate	s-CAR	methyl 4-oxopentanoate	COC(=O)CCC(C)=O	InChI=1S/C6H10O3/c1-5(7)3-4-6(8)9-2/h3-4H2,1-2H3	C6H10O3	130.142	-0.034	4473.4	3.87867	93.002	0
219	Methyl methylpentanoate	Methyl methylpentanoate	s-PNA	methyl 2-methylpentanoate	CCCC(C)C(=O)OC	InChI=1S/C7H14O2/c1-4-5-6(2)7(8)9-3/h6H,4-5H2,1-3H3/t6-/m0/s1	C7H14O2	130.185	2.062	4532.52	4.31815	45.429	0
220	Methyl octyl sulfide	Methyl octyl sulfide	s-PNA	1-methylsulfanyloctane	CCCCCCCCSC	InChI=1S/C9H20S/c1-3-4-5-6-7-8-9-10-2/h3-9H2,1-2H3	C9H20S	160.32	3.948	6445.1	9.67725	40.662	0
221	Methyl oxohexanoate	Methyl oxohexanoate	s-CAR	methyl 3-oxohexanoate	CCCC(=O)CC(=O)OC	InChI=1S/C7H12O3/c1-3-4-6(8)5-7(9)10-2/h3-5H2,1-2H3	C7H12O3	144.168	1.055	4986.66	4.75599	75.002	0
222	Methyl oxomethylpentanoate	Methyl oxomethylpentanoate	s-CAR	methyl 3-methyl-2-oxo-pentanoate	CCC(C)C(=O)C(=O)OC	InChI=1S/C7H12O3/c1-4-5(2)6(8)7(9)10-3/h5H,4H2,1-3H3/t5-/m0/s1	C7H12O3	144.168	1.482	4986.66	3.87732	75.859	0
223	Methyl pyruvate	Methyl pyruvate	s-CAR	methyl 2-oxopropanoate	COC(=O)C(C)=O	InChI=1S/C4H6O3/c1-3(5)4(6)7-2/h1-2H3	C4H6O3	102.089	-0.103	3446.88	2.22215	95.574	0
224	Methyl valerate	Methyl valerate	s-PNA	methyl pentanoate	CCCCC(=O)OC	InChI=1S/C6H12O2/c1-3-4-5-6(7)8-2/h3-5H2,1-2H3	C6H12O2	116.158	1.6	4019.26	4.55971	52.287	0
225	Methylallyl hexanoate	Methylallyl hexanoate	s-PNA	2-methylallyl hexanoate	CCCCCC(=O)OCC(C)=C	InChI=1S/C10H18O2/c1-4-5-6-7-10(11)12-8-9(2)3/h2,4-8H2,1,3H3	C10H18O2	170.249	3.119	6386.94	6.67292	40.286	0
226	Methylallyl isobutyrate	Methylallyl isobutyrate	s-PNA	2-methylallyl 2-methylpropanoate	CC(C)C(=O)OCC(C)=C	InChI=1S/C8H14O2/c1-6(2)5-10-8(9)7(3)4/h7H,1,5H2,2-4H3	C8H14O2	142.196	2.213	5360.42	3.96134	36.858	0
227	Methylbutyl butyrate	Methylbutyl butyrate	s-PNA	1-methylbutyl butanoate	CCCC(=O)OC(C)C(C)C	InChI=1S/C9H18O2/c1-4-6-8(3)11-9(10)7-5-2/h8H,4-7H2,1-3H3/t8-/m1/s1	C9H18O2	158.238	2.85	5559.04	6.13369	37.715	0
228	Methylbutyl hexanoate	Methylbutyl hexanoate	s-PNA	2-methylbutyl hexanoate	CCCCCC(=O)OCC(C)CC	InChI=1S/C11H22O2/c1-4-6-7-8-11(12)13-9-10(3)5-2/h10H,4-9H2,1-3H3/t10-/m1/s1	C11H22O2	186.291	3.704	6585.56	8.00386	39.429	0
229	Methylbutyl lactate	Methylbutyl lactate	s-CAR	2-methylbutyl 2-hydroxypropanoate	CCC(C)COC(=O)C(C)O	InChI=1S/C8H16O3/c1-4-6(2)5-11-8(10)7(3)9/h6-7,9H,4-5H2,1-3H3/t6-,7+/m1/s1	C8H16O3	160.211	1.481	5390.58	5.07155	84.505	0
230	Methylbutyl methylbutyrate	Methylbutyl methylbutyrate	s-PNA	2-methylbutyl 2-methylbutanoate	CCC(C)COC(=O)C(C)CC	InChI=1S/C10H20O2/c1-5-8(3)7-12-10(11)9(4)6-2/h8-9H,5-7H2,1-4H3/t8-,9-/m0/s1	C10H20O2	172.265	3.254	6072.3	5.98932	32.143	0
231	Methylcrotonic acid	Methylcrotonic acid	s-CAR	3-methylbut-2-enoic acid	CC(C)=CC(O)=O	InChI=1S/C5H8O2/c1-4(2)3-5(6)7/h3H,1-2H3,(H,6,7)	C5H8O2	100.116	1.341	3820.64	2.29985	91.791	0
232	Methylcyclohexenone	Methylcyclohexenone	s-CAR	3-methylcyclohex-2-en-1-one	CC1=CC(=O)CCC1	InChI=1S/C7H10O/c1-6-3-2-4-7(8)5-6/h5H,2-4H2,1H3	C7H10O	110.154	1.737	4361.6	1.46852	48.43	1
233	Methylcyclopentenolone butyrate	Methylcyclopentenolone butyrate	s-CAR	(2-methyl-5-oxo-cyclopenten-1-yl) butanoate	CCCC(=O)OC1=C(C)CCC1=O	InChI=1S/C10H14O3/c1-3-4-9(12)13-10-7(2)5-6-8(10)11/h3-6H2,1-2H3	C10H14O3	182.216	1.876	6700.32	3.36818	68.144	1
234	Methylcyclopentenolone	Methylcyclopentenolone	s-CAR	2-hydroxy-3-methyl-cyclopent-2-en-1-one	CC1=C(O)C(=O)CC1	InChI=1S/C6H8O2/c1-4-2-3-5(7)6(4)8/h8H,2-3H2,1H3	C6H8O2	112.127	0.743	4193.14	1.17557	94.754	1
235	Methylcyclopentenone	Methylcyclopentenone	s-CAR	3-methylcyclopent-2-en-1-one	CC1=CC(=O)CC1	InChI=1S/C6H8O/c1-5-2-3-6(7)4-5/h4H,2-3H2,1H3	C6H8O	96.1271	1.281	3848.34	0.97033	50.144	1
236	2-Methylfuran-3(2H)-one	2-Methylfuran-3(2H)-one	s-CAR	2-methylfuran-3-one	CC1OC=CC1=O	InChI=1S/C5H6O2/c1-4-5(6)2-3-7-4/h2-4H,1H3/t4-/m0/s1	C5H6O2	98.0999	0.137	3679.88	0.94666	70.716	1
237	5-Methylfuran-3(2H)-one	5-Methylfuran-3(2H)-one	s-CAR	5-methylfuran-3-one	CC1=CC(=O)CO1	InChI=1S/C5H6O2/c1-4-2-5(6)3-7-4/h2H,3H2,1H3	C5H6O2	98.0999	0.167	3679.88	0.94666	77.145	1
238	Methylfurfural	Methylfurfural	s-CAR	5-methylfuran-2-carbaldehyde	CC1=CC=C(O1)C=O	InChI=1S/C6H6O2/c1-5-2-3-6(4-7)8-5/h2-4H,1H3	C6H6O2	110.111	1.13	4507.78	1.15888	71.573	1
239	Methylfurfuryl alcohol	Methylfurfuryl alcohol	s-CAR	(5-methyl-2-furyl)methanol	CC1=CC=C(CO)O1	InChI=1S/C6H8O2/c1-5-2-3-6(4-7)8-5/h2-3,7H,4H2,1H3	C6H8O2	112.127	0.552	4398.44	1.34909	70.519	1
240	Methylfurylpropanedione	Methylfurylpropanedione	s-CAR	1-(5-methyl-2-furyl)propane-1,2-dione	CC(=O)C(=O)C1=CC=C(C)O1	InChI=1S/C8H8O3/c1-5-3-4-7(11-5)8(10)6(2)9/h3-4H,1-2H3	C8H8O3	152.147	0.986	5988.44	1.89456	81.859	1
241	Methylfurylpropenal 3-(5-Methyl-2-furyl)prop-2-enal	Methylfurylpropenal 3-(5-Methyl-2-furyl)prop-2-enal	s-CAR	(E)-3-(5-methyl-2-furyl)prop-2-enal	CC1=CC=C(O1)\\C=C\\C=O	InChI=1S/C8H8O2/c1-7-4-5-8(10-7)3-2-6-9/h2-6H,1H3/b3-2+	C8H8O2	136.148	1.49	5848.94	2.04953	77.145	1
242	Methylnonanedione	Methylnonanedione	s-CAR	3-methylnonane-2,4-dione	CCCCCC(=O)C(C)C(C)=O	InChI=1S/C10H18O2/c1-4-5-6-7-10(12)8(2)9(3)11/h8H,4-7H2,1-3H3/t8-/m1/s1	C10H18O2	170.249	2.305	6181.64	5.59777	68.144	0
243	2-Methyl-2-pentenoic acid	2-Methyl-2-pentenoic acid	STR-CAR	(E)-2-methylpent-2-enoic acid	CC\\C=C(/C)C(O)=O	InChI=1S/C6H10O2/c1-3-4-5(2)6(7)8/h4H,3H2,1-2H3,(H,7,8)/b5-4+	C6H10O2	114.142	1.797	4333.9	3.11552	93.817	0
244	Methylphenylbutenone	Methylphenylbutenone	s-CAR	(E)-3-methyl-4-phenyl-but-3-en-2-one	CC(=O)\\C(C)=C\\C1=CC=CC=C1	InChI=1S/C11H12O/c1-9(10(2)12)8-11-6-4-3-5-7-11/h3-8H,1-2H3/b9-8+	C11H12O	160.212	2.474	7358.56	2.80668	39.429	1
245	4-Methyl-1-phenyl-2-pentanone	4-Methyl-1-phenyl-2-pentanone	s-CAR	4-methyl-1-phenyl-pentan-2-one	CC(C)CC(=O)CC1=CC=CC=C1	InChI=1S/C12H16O/c1-10(2)8-12(13)9-11-6-4-3-5-7-11/h3-7,10H,8-9H2,1-2H3	C12H16O	176.255	2.97	7557.18	3.68605	32.572	1
246	2-Methyltetrahydrofuran-3-one	2-Methyltetrahydrofuran-3-one	s-CAR	2-methyltetrahydrofuran-3-one	CC1OCCC1=O	InChI=1S/C5H8O2/c1-4-5(6)2-3-7-4/h4H,2-3H2,1H3/t4-/m0/s1	C5H8O2	100.116	0.05	3365.24	1.10676	68.573	1
247	Methylthiomethyl hexanoate	Methylthiomethyl hexanoate	s-PNA	methylsulfanylmethyl hexanoate	CCCCCC(=O)OCSC	InChI=1S/C8H16O2S/c1-3-4-5-6-8(9)10-7-11-2/h3-7H2,1-2H3	C8H16O2S	176.276	2.652	6730.78	8.0655	90.723	0
248	o-Methylthiophenol	o-Methylthiophenol	s-CAR	2-methylsulfanylphenol	CSC1=C(O)C=CC=C1	InChI=1S/C7H8OS/c1-9-7-5-3-2-4-6(7)8/h2-5,8H,1H3	C7H8OS	140.203	2.129	6566.54	2.02986	87.779	1
249	Methylthiopropyl hexanoate	Methylthiopropyl hexanoate	s-PNA	3-methylsulfanylpropyl hexanoate	CCCCCC(=O)OCCCSC	InChI=1S/C10H20O2S/c1-3-4-5-7-10(11)12-8-6-9-13-2/h3-9H2,1-2H3	C10H20O2S	204.33	2.732	7757.3	10.048	86.949	0
250	Naphthyl butyl ether	Naphthyl butyl ether	s-STR/t-STR	2-butoxynaphthalene	CCCCOC1=CC=C2C=CC=CC2=C1	InChI=1S/C14H16O/c1-2-3-10-15-14-9-8-12-6-4-5-7-13(12)11-14/h4-9,11H,2-3,10H2,1H3	C14H16O	200.276	4.05	8962.88	3.35711	15.429	2
251	Naphthyl isobutyl ether	Naphthyl isobutyl ether	s-STR/t-STR	2-isobutoxynaphthalene	CC(C)COC1=CC2=CC=CC=C2C=C1	InChI=1S/C14H16O/c1-11(2)10-15-14-8-7-12-5-3-4-6-13(12)9-14/h3-9,11H,10H2,1-2H3	C14H16O	200.276	3.913	8962.88	3.02428	10.286	2
252a	[(2Z,5E)-2,6-dimethylocta-2,5,7-trienyl] acetate	Ocimenyl acetate	s-PNA	[(2Z,5E)-2,6-dimethylocta-2,5,7-trienyl] acetate	CC(=O)OC\C(=C/C\C=C(/C)\C=C)\C	InChI=1S/C12H18O2/c1-5-10(2)7-6-8-11(3)9-14-12(4)13/h5,7-8H,1,6,9H2,2-4H3/b10-7+,11-8-	C12H18O2	194.27	2.922	8042.74	6.67503	47.144	0
252b	[(2E,5Z)-2,6-dimethylocta-2,5,7-trienyl] acetate	Ocimenyl acetate	s-PNA	[(2E,5Z)-2,6-dimethylocta-2,5,7-trienyl] acetate	CC(=O)OC\C(=C\C\C=C(\C)/C=C)\C	InChI=1S/C12H18O2/c1-5-10(2)7-6-8-11(3)9-14-12(4)13/h5,7-8H,1,6,9H2,2-4H3/b10-7-,11-8+	C12H18O2	194.27	2.922	8042.74	6.67503	47.144	0
253	Octane-4,5-dione	Octane-4,5-dione	s-CAR	octane-4,5-dione	CCCC(=O)C(=O)CCC	InChI=1S/C8H14O2/c1-3-5-7(9)8(10)6-4-2/h3-6H2,1-2H3	C8H14O2	142.196	2.018	5155.12	4.81073	64.716	0
254	2-Octen-4-one	2-Octen-4-one	s-PNA	(E)-oct-2-en-4-one	CCCCC(=O)\\C=C\\C	InChI=1S/C8H14O/c1-3-5-7-8(9)6-4-2/h4,6H,3,5,7H2,1-2H3/b6-4+	C8H14O	126.196	2.575	5015.62	5.18145	31.286	0
255	(Z)-5-Octenyl acetate	(Z)-5-Octenyl acetate	s-PNA	[(Z)-oct-5-enyl] acetate	CC\\C=C/CCCCOC(C)=O	InChI=1S/C10H18O2/c1-3-4-5-6-7-8-9-12-10(2)11/h4-5H,3,6-9H2,1-2H3/b5-4-	C10H18O2	170.249	2.73	6386.94	8.02194	55.715	0
256	(Z)-5-Octenyl propionate	(Z)-5-Octenyl propionate	s-PNA	[(Z)-oct-5-enyl] propanoate	CC\\C=C/CCCCOC(=O)CC	InChI=1S/C11H20O2/c1-3-5-6-7-8-9-10-13-11(12)4-2/h5-6H,3-4,7-10H2,1-2H3/b6-5-	C11H20O2	184.275	3.396	6900.2	8.9996	45.001	0
257	Octyl acetoacetate	Octyl acetoacetate	s-CAR	octyl 3-oxobutanoate	CCCCCCCCOC(=O)CC(C)=O	InChI=1S/C12H22O3/c1-3-4-5-6-7-8-9-15-12(14)10-11(2)13/h3-10H2,1-2H3	C12H22O3	214.301	3.085	7552.96	9.38068	78.859	0
258	Oxobutyric acid	Oxobutyric acid	s-CAR	2-oxobutanoic acid	CCC(=O)C(O)=O	InChI=1S/C4H6O3/c1-2-3(5)4(6)7/h2H2,1H3,(H,6,7)	C4H6O3	102.089	0.338	3446.88	2.22215	130.013	0
259	Oxoethylbutanolide	Oxoethylbutanolide	s-CAR	3-ethyl-4-hydroxy-2H-furan-5-one	CCC1=C(O)C(=O)OC1	InChI=1S/C6H8O3/c1-2-4-3-9-6(8)5(4)7/h7H,2-3H2,1H3	C6H8O3	128.126	0.753	4537.94	1.63972	122.183	1
260	Oxophenylpropionic acid	Oxophenylpropionic acid	s-CAR	2-oxo-3-phenyl-propanoic acid	OC(=O)C(=O)CC1=CC=CC=C1	InChI=1S/C9H8O3/c10-8(9(11)12)6-7-4-2-1-3-5-7/h1-5H,6H2,(H,11,12)	C9H8O3	164.158	1.37	6816.34	2.71418	124.753	1
261	3-Pentanone	3-Pentanone	s-CAR	pentan-3-one	CCC(=O)CC	InChI=1S/C5H10O/c1-3-5(6)4-2/h3-4H2,1-2H3	C5H10O	86.1323	1.229	3161.2	2.7255	29.572	0
262	Pentanoylthiophene	Pentanoylthiophene	s-CAR	1-(2-thienyl)pentan-1-one	CCCCC(=O)C1=CC=CS1	InChI=1S/C9H12OS/c1-2-3-5-8(10)9-6-4-7-11-9/h4,6-7H,2-3,5H2,1H3	C9H12OS	168.256	2.875	7387.76	3.30186	80.783	1
263	4-Pentenoic acid	4-Pentenoic acid	s-CAR	pent-4-enoic acid	OC(=O)CCC=C	InChI=1S/C5H8O2/c1-2-3-4-5(6)7/h2H,1,3-4H2,(H,6,7)	C5H8O2	100.116	0.984	3820.64	3.23615	94.908	0
264	2-Pentenoic acid	2-Pentenoic acid	s-CAR	(E)-pent-2-enoic acid	CC\\C=C\\C(O)=O	InChI=1S/C5H8O2/c1-2-3-4-5(6)7/h3-4H,2H2,1H3,(H,6,7)/b4-3+	C5H8O2	100.116	1.351	3820.64	3.23615	100.363	0
265	Phenethyl furoate	Phenethyl furoate	s-CAR	2-phenylethyl furan-2-carboxylate	O=C(OCCC1=CC=CC=C1)C2=CC=CO2	InChI=1S/C13H12O3/c14-13(12-7-4-9-15-12)16-10-8-11-5-2-1-3-6-11/h1-7,9H,8,10H2	C13H12O3	216.233	2.985	9248.56	3.51099	70.716	2
266	Phenethyl valerate	Phenethyl valerate	s-PNA	2-phenylethyl pentanoate	CCCCC(=O)OCCC1=CC=CC=C1	InChI=1S/C13H18O2/c1-2-3-9-13(14)15-11-10-12-7-5-4-6-8-12/h4-8H,2-3,9-11H2,1H3	C13H18O2	206.281	3.505	8415.24	5.70882	45.858	1
267	Phenylpropyl isovalerate	Phenylpropyl isovalerate	s-STR/t-STR	3-phenylpropyl 3-methylbutanoate	CC(C)CC(=O)OCCCC1=CC=CC=C1	InChI=1S/C14H20O2/c1-12(2)11-14(15)16-10-6-9-13-7-4-3-5-8-13/h3-5,7-8,12H,6,9-11H2,1-2H3	C14H20O2	220.307	3.756	8928.5	5.79472	39.001	1
268	Phenylpropyltetrahydrofuran	Phenylpropyltetrahydrofuran	s-CAR	2-(3-phenylpropyl)tetrahydrofuran	C1COC(C1)CCCC2=CC=CC=C2	InChI=1S/C13H18O/c1-2-6-12(7-3-1)8-4-9-13-10-5-11-14-13/h1-3,6-7,13H,4-5,8-11H2/t13-/m0/s1	C13H18O	190.281	3.357	7820.34	3.58273	22.286	2
269	Piperitenone oxide	Piperitenone oxide	s-PNA	3-isopropenyl-6-methyl-7-oxabicyclo[4.1.0]heptan-5-one	CC(=C)C1CC2OC2(C)C(=O)C1	InChI=1S/C10H14O2/c1-6(2)7-4-8(11)10(3)9(5-7)12-10/h7,9H,1,4-5H2,2-3H3/t7-,9-,10+/m1/s1	C10H14O2	166.217	1.402	6105.42	1.46107	64.287	2
270	Propionylmethylfuran	Propionylmethylfuran	s-CAR	1-(3-methyl-2-furyl)propan-1-one	CCC(=O)C1=C(C)C=CO1	InChI=1S/C8H10O2/c1-3-7(9)8-6(2)4-5-10-8/h4-5H,3H2,1-2H3	C8H10O2	138.164	2.118	5534.3	1.89894	57.858	1
271	Propyl acetoacetate	Propyl acetoacetate	s-CAR	propyl 3-oxobutanoate	CCCOC(=O)CC(C)=O	InChI=1S/C7H12O3/c1-3-4-10-7(9)5-6(2)8/h3-5H2,1-2H3	C7H12O3	144.168	0.804	4986.66	4.75599	78.43	0
272	Propyl crotonate	Propyl crotonate	s-CAR	propyl (E)-but-2-enoate	CCCOC(=O)\\C=C\\C	InChI=1S/C7H12O2/c1-3-5-7(8)9-6-4-2/h3,5H,4,6H2,1-2H3/b5-3+	C7H12O2	128.169	1.993	4847.16	5.12028	49.287	0
273	Propyl cyclohexanepropionate	Propyl cyclohexanepropionate	s-PNA	propyl 3-cyclohexylpropanoate	CCCOC(=O)CCC1CCCCC1	InChI=1S/C12H22O2/c1-2-10-14-12(13)9-8-11-6-4-3-5-7-11/h11H,2-10H2,1H3	C12H22O2	198.302	3.721	6958.06	5.84558	46.287	1
274	Propyl furanacrylate	Propyl furanacrylate	s-STR	propyl (E)-3-(2-furyl)prop-2-enoate	CCCOC(=O)\\C=C\\C1=CC=CO1	InChI=1S/C10H12O3/c1-2-7-13-10(11)6-5-9-4-3-8-12-9/h3-6,8H,2,7H2,1H3/b6-5+	C10H12O3	180.2	2.42	7220.26	3.98628	76.716	1
275	Propyl hexanoate	Propyl hexanoate	s-PNA	propyl hexanoate	CCCCCC(=O)OCCC	InChI=1S/C9H18O2/c1-3-5-6-7-9(10)11-8-4-2/h3-8H2,1-2H3	C9H18O2	158.238	2.929	5559.04	7.4737	46.287	0
276	Propyl isobutyrate	Propyl isobutyrate	s-PNA	propyl 2-methylpropanoate	CCCOC(=O)C(C)C	InChI=1S/C7H14O2/c1-4-5-9-7(8)6(2)3/h6H,4-5H2,1-3H3	C7H14O2	130.185	2.022	4532.52	4.31815	39.001	0
277	Propyl isohexanoate	Propyl isohexanoate	s-PNA	propyl 4-methylpentanoate	CCCOC(=O)CCC(C)C	InChI=1S/C9H18O2/c1-4-7-11-9(10)6-5-8(2)3/h8H,4-7H2,1-3H3	C9H18O2	158.238	2.724	5559.04	6.13369	46.287	0
278	Propyl lactate	Propyl lactate	s-CAR	propyl 2-hydroxypropanoate	CCCOC(=O)C(C)O	InChI=1S/C6H12O3/c1-3-4-9-6(8)5(2)7/h5,7H,3-4H2,1-2H3/t5-/m1/s1	C6H12O3	132.158	0.705	4364.06	4.2636	89.376	0
279	Propyl levulinate	Propyl levulinate	s-CAR/t-CAR	propyl 4-oxopentanoate	CCCOC(=O)CCC(C)=O	InChI=1S/C8H14O3/c1-3-6-11-8(10)5-4-7(2)9/h3-6H2,1-2H3	C8H14O3	158.195	0.839	5499.92	5.65469	87.002	0
280	Propyl mercaptopropionate	Propyl mercaptopropionate	s-STR	propyl 2-sulfanylpropanoate	CCCOC(=O)C(C)S	InChI=1S/C6H12O2S/c1-3-4-8-6(7)5(2)9/h5,9H,3-4H2,1-2H3/t5-/m1/s1	C6H12O2S	148.223	1.677	5704.26	4.81055	112.793	0
281	Propyl methylbutyrate	Propyl methylbutyrate	s-PNA	propyl 2-methylbutanoate	CCCOC(=O)C(C)CC	InChI=1S/C8H16O2/c1-4-6-10-8(9)7(3)5-2/h7H,4-6H2,1-3H3/t7-/m0/s1	C8H16O2	144.211	2.479	5045.78	5.21715	38.144	0
282	Propyl pyruvate	Propyl pyruvate	s-CAR	propyl 2-oxopropanoate	CCCOC(=O)C(C)=O	InChI=1S/C6H10O3/c1-3-4-9-6(8)5(2)7/h3-4H2,1-2H3	C6H10O3	130.142	0.769	4473.4	3.87867	88.288	0
283	Propyl sorbate	Propyl sorbate	s-PNA	propyl (2E,4E)-hexa-2,4-dienoate	CCCOC(=O)/C=C/C=C/C	InChI=1S/C9H14O2/c1-3-5-6-7-9(10)11-8-4-2/h3,5-7H,4,8H2,1-2H3/b5-3+,7-6+	C9H14O2	154.206	2.461	6188.32	6.63562	45.429	0
284	Propyl valerate	Propyl valerate	s-PNA	propyl pentanoate	CCCCC(=O)OCCC	InChI=1S/C8H16O2/c1-3-5-6-8(9)10-7-4-2/h3-7H2,1-2H3	C8H16O2	144.211	2.472	5045.78	6.49627	45.858	0
285	Propylthiazolidine	Propylthiazolidine	s-CAR	2-propylthiazolidine	CCCC1NCCS1	InChI=1S/C6H13NS/c1-2-3-6-7-4-5-8-6/h6-7H,2-5H2,1H3/t6-/m1/s1	C6H13NS	131.239	1.486	5197.84	2.6991	58.534	1
286	Sotolon	Sotolon	s-CAR/t-CAR	4-hydroxy-2,3-dimethyl-2H-furan-5-one	CC1OC(=O)C(=C1C)O	InChI=1S/C6H8O3/c1-3-4(2)9-6(8)5(3)7/h4,7H,1-2H3/t4-/m0/s1	C6H8O3	128.126	0.674	4537.94	1.38454	122.69	1
287	Strawberry furanone	Strawberry furanone	Furaneol	4-hydroxy-2,5-dimethyl-furan-3-one	CC1OC(=C(O)C1=O)C	InChI=1S/C6H8O3/c1-3-5(7)6(8)4(2)9-3/h3,8H,1-2H3/t3-/m1/s1	C6H8O3	128.126	0.113	4537.94	1.38454	110.066	1
288	Tetrahydrofurfuryl alcohol	Tetrahydrofurfuryl alcohol	s-CAR	tetrahydrofuran-2-ylmethanol	OCC1CCCO1	InChI=1S/C5H10O2/c6-4-5-2-1-3-7-5/h5-6H,1-4H2/t5-/m1/s1	C5H10O2	102.132	0	3255.9	1.65287	74.881	1
289	Tetrahydrofurfuryl butyrate	Tetrahydrofurfuryl butyrate	s-PNA	tetrahydrofuran-2-ylmethyl butanoate	CCCC(=O)OCC1CCCO1	InChI=1S/C9H16O3/c1-2-4-9(10)12-7-8-5-3-6-11-8/h8H,2-7H2,1H3/t8-/m1/s1	C9H16O3	172.222	1.503	5763.08	4.25227	61.716	1
290	Tetrahydrofurfuryl propionate	Tetrahydrofurfuryl propionate	s-CAR	tetrahydrofuran-2-ylmethyl propanoate	CCC(=O)OCC1CCCO1	InChI=1S/C8H14O3/c1-2-8(9)11-6-7-4-3-5-10-7/h7H,2-6H2,1H3/t7-/m0/s1	C8H14O3	158.195	1.046	5249.82	3.52453	59.573	1
291a	5-ethyl-2,3,4,5-tetramethylcyclohexone	Tetramethylethylcyclohexenone	s-CAR	5-ethyl-2,3,4,5-tetramethyl-cyclohex-2-en-1-one	CCC1(C)CC(=O)C(=C(C)C1C)C	InChI=1S/C12H20O/c1-6-12(5)7-11(13)9(3)8(2)10(12)4/h10H,6-7H2,1-5H3/t10-,12-/m0/s1	C12H20O	180.287	3.349	6927.9	2.64845	39.429	1
291b	5-ethyl-3,4,5,6-tetramethylcyclohexone	Tetramethylethylcyclohexenone	s-CAR	5-ethyl-3,4,5,6-tetramethyl-cyclohex-2-en-1-one	CCC1(C)C(C)C(=CC(=O)C1C)C	InChI=1S/C12H20O/c1-6-12(5)9(3)8(2)7-11(13)10(12)4/h7,9-10H,6H2,1-5H3/t9-,10+,12+/m0/s1	C12H20O	180.287	3.366	6927.9	2.64845	40.715	1
292	Thienylmercaptan	Thienylmercaptan	s-CAR	thiophene-2-thiol	SC1=CC=CS1	InChI=1S/C4H4S2/c5-4-2-1-3-6-4/h1-3,5H	C4H4S2	116.205	2.026	6052.32	1.07592	127.574	1
293	Ethyl 2-methyl-3-pentenoate	Ethyl 2-methyl-3-pentenoate	STR-PNA	ethyl (Z)-2-methylpent-3-enoate	CCOC(=O)C(C)C=CC	InChI=1S/C8H14O2/c1-4-6-7(3)8(9)10-5-2/h4,6-7H,5H2,1-3H3/b6-4-/t7-/m0/s1	C8H14O2	142.196	1.967	5360.42	4.852	53.573	0

## Sheet: Table S3 Statistical parameters
Table S3. Descriptive statistics parameters.
Factor	Subset	Factor / Subset	Nbr. of observations	Minimum	Maximum	1st Quartile	Median	3rd Quartile	Mean	Variance (n-1)	Standard deviation (n-1)	Variation coefficient	Standard error of the mean	Standard error of the variance
MW	s-STR	MW / s-STR	10	130.185	220.307	156.217	189.262	200.276	180.643	913.936	30.2314	0.158767	9.56	430.833
MW	s-CAR	MW / s-CAR	146	74.0785	246.391	116.115	142.196	169.719	144.491	1211.11	34.801	0.240025	2.88015	142.237
MW	s-PNA	MW / s-PNA	126	102.132	256.424	144.211	169.241	187.738	168.561	957.692	30.9466	0.182863	2.75694	121.139
MW	t-STR	MW / t-STR	7	130.185	220.307	165.209	200.276	203.257	183.957	1167.33	34.1662	0.171952	12.9136	673.958
MW	t-CAR	MW / t-CAR	7	116.115	206.238	134.132	144.125	156.179	149.586	834.076	28.8804	0.178747	10.9158	481.554
MW	t-PNA	MW / t-PNA	7	128.169	210.313	151.225	170.249	193.283	171.107	902.727	30.0454	0.162569	11.3561	521.19
MW	STR-CAR	MW / STR-CAR	9	114.099	210.226	126.11	182.173	196.2	165.949	1518.76	38.9712	0.221407	12.9904	759.379
MW	STR-PNA	MW / STR-PNA	4	130.185	198.302	139.193	143.204	157.734	153.724	921.558	30.3572	0.171022	15.1786	752.449
ALogP98	s-STR	ALogP98 / s-STR	10	0.558	4.05	1.8955	2.137	3.422	2.4476	1.26928	1.12663	0.436677	0.35627	0.598346
ALogP98	s-CAR	ALogP98 / s-CAR	146	-0.776	4.552	0.73625	1.255	1.842	1.31588	0.894255	0.94565	0.716178	0.0782626	0.105025
ALogP98	s-PNA	ALogP98 / s-PNA	126	0.353	6.122	2.0665	2.5405	3.284	2.69664	1.00609	1.00304	0.37048	0.0893579	0.127261
ALogP98	t-STR	ALogP98 / t-STR	7	0.558	4.05	1.914	1.955	3.8345	2.58	1.78162	1.33477	0.478977	0.504497	1.02862
ALogP98	t-CAR	ALogP98 / t-CAR	7	-0.775	1.55	0.2735	0.674	0.796	0.512571	0.506724	0.711845	1.28575	0.269052	0.292557
ALogP98	t-PNA	ALogP98 / t-PNA	7	1.612	3.922	2.422	2.782	3.0955	2.76443	0.540213	0.734992	0.246152	0.277801	0.311892
ALogP98	STR-CAR	ALogP98 / STR-CAR	9	-0.371	1.797	0.454	0.917	1.246	0.769667	0.52345	0.723499	0.886255	0.241166	0.261725
ALogP98	STR-PNA	ALogP98 / STR-PNA	4	1.87	3.785	1.94275	2.186	2.75	2.50675	0.780352	0.883375	0.305186	0.441688	0.637155
Apol	s-STR	Apol / s-STR	10	4532.52	8962.88	5805.16	7232.15	8722.88	7112.97	2.65335e+06	1628.91	0.217254	515.107	1.2508e+06
Apol	s-CAR	Apol / s-CAR	146	2479.48	12302.7	4407.49	5219.66	6294.3	5407.84	2.26274e+06	1504.24	0.277205	124.492	265745
Apol	s-PNA	Apol / s-PNA	126	3506	9781.14	5360.42	6273.15	6922.82	6254.81	1.68492e+06	1298.05	0.206702	115.639	213128
Apol	t-STR	Apol / t-STR	7	4532.52	8962.88	5734.15	8106.02	8945.69	7280.16	3.61189e+06	1900.5	0.241687	718.32	2.08532e+06
Apol	t-CAR	Apol / t-CAR	7	3960.14	8356.12	4710.34	5365.84	5586.86	5468.07	1.97937e+06	1406.9	0.238208	531.759	1.14279e+06
Apol	t-PNA	Apol / t-PNA	7	4847.16	7785.96	5302.41	6386.94	6687.58	6142.86	1.11566e+06	1056.25	0.159192	399.224	644125
Apol	STR-CAR	Apol / STR-CAR	9	4024.68	7873.02	4852.58	6846.5	7359.76	6139.98	2.12783e+06	1458.71	0.223988	486.236	1.06392e+06
Apol	STR-PNA	Apol / STR-PNA	4	4532.52	7413.46	4917.47	5203.1	5873.68	5588.05	1.59738e+06	1263.87	0.195873	631.937	1.30425e+06
PHI	s-STR	PHI / s-STR	10	2.58718	6.48021	3.37103	4.15221	4.84164	4.26233	1.54165	1.24163	0.276355	0.392638	0.726739
PHI	s-CAR	PHI / s-CAR	146	0.88078	9.38068	1.87873	3.01362	4.26197	3.2801	2.91232	1.70655	0.518489	0.141235	0.342035
PHI	s-PNA	PHI / s-PNA	126	1.46107	14.3882	5.12028	6.13369	8.00386	6.48064	4.55262	2.13369	0.327931	0.190084	0.575866
PHI	t-STR	PHI / t-STR	7	2.58718	5.79472	3.19069	3.41279	4.58507	3.9066	1.28222	1.13235	0.268354	0.427988	0.740288
PHI	t-CAR	PHI / t-CAR	7	1.38454	5.65469	1.91667	2.19359	3.86801	2.97174	2.59496	1.61089	0.501859	0.608858	1.4982
PHI	t-PNA	PHI / t-PNA	7	5.0579	8.88883	5.16872	6.13369	7.17659	6.39586	2.28976	1.51319	0.219039	0.571934	1.32199
PHI	STR-CAR	PHI / STR-CAR	9	1.15151	3.93756	2.41517	3.11552	3.54578	2.86623	0.975905	0.987879	0.32495	0.329293	0.487953
PHI	STR-PNA	PHI / STR-PNA	4	4.31815	9.98055	4.71854	5.67413	7.36734	6.41174	6.51982	2.55339	0.344883	1.2767	5.32341
PolarSASA	s-STR	PolarSASA / s-STR	10	10.286	112.793	39.001	54.313	70.7157	53.9855	934.496	30.5695	0.537196	9.66693	440.526
PolarSASA	s-CAR	PolarSASA / s-CAR	146	22.286	187.129	65.4655	79.502	91.7172	78.9266	567.664	23.8257	0.300836	1.97183	66.6688
PolarSASA	s-PNA	PolarSASA / s-PNA	126	30.858	105.828	40.286	46.287	53.144	50.2668	232.121	15.2355	0.301888	1.35729	29.3613
PolarSASA	t-STR	PolarSASA / t-STR	7	10.286	72.43	27.215	39.001	56.144	41.205	538.21	23.1994	0.521258	8.76853	310.736
PolarSASA	t-CAR	PolarSASA / t-CAR	7	68.573	144.039	83.145	87.859	110.981	98.3891	694.938	26.3617	0.248058	9.96378	401.223
PolarSASA	t-PNA	PolarSASA / t-PNA	7	35.572	89.221	41.572	45.858	49.7155	50.4609	324.309	18.0086	0.330409	6.80661	187.24
PolarSASA	STR-CAR	PolarSASA / STR-CAR	9	67.287	118.092	72.002	79.716	109.521	88.4777	396.047	19.9009	0.212062	6.63365	198.024
PolarSASA	STR-PNA	PolarSASA / STR-PNA	4	37.286	53.573	43.715	46.501	48.7512	45.9652	44.8694	6.69846	0.126205	3.34923	36.6357

## Sheet: Table S4 Normality tests
Table S4. Normality tests for the molecular descriptor distributions.
		*a=0.05
Normality test	Statistical parameters*
		MW								AlogP98								Apol								PHI								Polar SASA
		s-STR	s-CAR	s-PNA	t-STR	t-CAR	t-PNA	STR-CAR	STR-PNA	s-STR	s-CAR	s-PNA	t-STR	t-CAR	t-PNA	STR-CAR	STR-PNA	s-STR	s-CAR	s-PNA	t-STR	t-CAR	t-PNA	STR-CAR	STR-PNA	s-STR	s-CAR	s-PNA	t-STR	t-CAR	t-PNA	STR-CAR	STR-PNA	s-STR	s-CAR	s-PNA	t-STR	t-CAR	t-PNA	STR-CAR	STR-PNA
Shapiro-Wilk test	W	0.909194	0.982586	0.974234	0.852311	0.903631	0.969327	0.848684	0.804102	0.904216	0.985639	0.976504	0.868843	0.941851	0.989505	0.954925	0.824084	0.91103	0.957458	0.973772	0.833582	0.846377	0.95415	0.886323	0.861882	0.960321	0.93367	0.968367	0.939247	0.867253	0.853134	0.880092	0.886926	0.963275	0.955138	0.817363	0.93694	0.919136	0.745479	0.852862	0.966719
	p-value	0.275499	0.0610248	0.0164871	0.129017	0.353537	0.893559	0.0720745	0.109782	0.243571	0.133535	0.027101	0.181347	0.655445	0.992262	0.744009	0.152894	0.288143	0.000179621	0.0149139	0.0865057	0.11384	0.767255	0.182818	0.267004	0.789528	< 0,0001	0.00475359	0.631949	0.175603	0.131261	0.157371	0.369059	0.822471	0.000112766	< 0,0001	0.611331	0.462709	0.0113775	0.0801201	0.821075
Anderson-Darling test	A²	0.464405	0.608911	0.851092	0.554845	0.371346	0.149799	0.600889	0.502156	0.512415	0.611564	0.830417	0.501801	0.317944	0.155914	0.219935	0.432474	0.355642	0.956384	0.93857	0.54454	0.544608	0.20988	0.478716	0.389012	0.207505	1.98315	1.3301	0.269516	0.48003	0.484512	0.500894	0.323281	0.209999	1.38204	8.09361	0.253168	0.336637	0.845183	0.609415	0.230869
	p-value	0.197556	0.111489	0.0278434	0.0952609	0.311139	0.92873	0.0812969	0.0816341	0.145853	0.109811	0.0313339	0.132634	0.433227	0.91661	0.762887	0.135966	0.381859	0.0153332	0.0168963	0.101919	0.101873	0.770421	0.173989	0.189865	0.813701	< 0,0001	0.00181294	0.553799	0.15358	0.149035	0.150887	0.309153	0.805718	0.00135786	< 0,0001	0.606533	0.386287	0.0142311	0.0770349	0.564385
Lilliefors test	D	0.198971	0.0658062	0.093835	0.263945	0.239954	0.136058	0.225637	0.372994	0.209772	0.0639446	0.076787	0.251624	0.211167	0.14921	0.136981	0.29585	0.167483	0.0897873	0.0849781	0.239484	0.299014	0.162802	0.241487	0.321463	0.153079	0.0886694	0.114499	0.240045	0.2569	0.23132	0.263416	0.236796	0.128569	0.0950445	0.235249	0.176442	0.226647	0.305927	0.228165	0.243613
	D (standardized)	0.6292	0.795139	1.0533	0.698334	0.634858	0.359976	0.676911	0.745987	0.663358	0.772646	0.861932	0.665733	0.558694	0.394773	0.410943	0.5917	0.529626	1.0849	0.953877	0.633616	0.791115	0.430734	0.72446	0.642927	0.484078	1.0714	1.28525	0.6351	0.679694	0.612015	0.790248	0.473592	0.406571	1.14843	2.64066	0.466822	0.599652	0.809408	0.684495	0.487226
	p-value	0.316363	0.126558	0.00843368	0.147645	0.257557	0.959525	0.206619	0.0539328	0.242509	0.15255	0.0654818	0.197961	0.451801	0.908456	0.896449	0.248319	0.591884	0.00583076	0.0261175	0.260201	0.0581734	0.83125	0.135987	0.152763	0.727855	0.00689374	0.000347697	0.257043	0.174875	0.309185	0.071783	0.594977	0.910666	0.00256137	< 0,0001	0.733055	0.339669	0.0465882	0.193637	0.549186
Jarque-Bera test	JB (Observed value)	0.945114	3.48718	5.36456	0.944846	1.19814	0.466951	1.11074	0.771373	0.373119	4.57761	10.4715	0.553083	0.28704	0.0847391	0.500643	0.707109	0.817117	48.0075	5.36549	0.890526	2.04996	0.406422	1.02253	0.659354	0.600152	25.978	11.2883	0.607225	0.953487	0.891342	1.13783	0.556709	0.229798	50.1731	85.023	0.431036	0.760704	3.59741	1.12267	0.2182
JB (Critical value)=5.991 DF=2	JB (Critical value)	5.99146	5.99146	5.99146	5.99146	5.99146	5.99146	5.99146	5.99146	5.99146	5.99146	5.99146	5.99146	5.99146	5.99146	5.99146	5.99146	5.99146	5.99146	5.99146	5.99146	5.99146	5.99146	5.99146	5.99146	5.99146	5.99146	5.99146	5.99146	5.99146	5.99146	5.99146	5.99146	5.99146	5.99146	5.99146	5.99146	5.99146	5.99146	5.99146	5.99146

## Sheet: Table S5 paiwise comparison
Table S5. Detailed statistical results of the pairwise comparisons.
Molecular_Weight:
Differences:										p-values:										Significant differences:
	STR-CAR	STR-PNA	s-CAR	s-PNA	s-STR	t-CAR	t-PNA	t-STR			STR-CAR	STR-PNA	s-CAR	s-PNA	s-STR	t-CAR	t-PNA	t-STR			STR-CAR	STR-PNA	s-CAR	s-PNA	s-STR	t-CAR	t-PNA	t-STR
STR-CAR	0	31.125	53.2534	-10.2857	-43.5	47.2857	-21.4286	-49.3571		STR-CAR	1	0.570706	0.0896221	0.744163	0.300005	0.304339	0.641583	0.283644		STR-CAR	No	No	No	No	No	No	No	No
STR-PNA	-31.125	0	22.1284	-41.4107	-74.625	16.1607	-52.5536	-80.4821		STR-PNA	0.570706	1	0.632661	0.372068	0.167318	0.777745	0.358679	0.15982		STR-PNA	No	No	No	No	No	No	No	No
s-CAR	-53.2534	-22.1284	0	-63.5391	-96.7534	-5.96771	-74.682	-102.611		s-CAR	0.0896221	0.632661	1	< 0,0001	0.00119408	0.865918	0.0346009	0.00369384		s-CAR	No	No	No	Yes	Yes	No	No	No
s-PNA	10.2857	41.4107	63.5391	0	-33.2143	57.5714	-11.1429	-39.0714		s-PNA	0.744163	0.372068	< 0,0001	1	0.268408	0.104589	0.753423	0.270694		s-PNA	No	No	Yes	No	No	No	No	No
s-STR	43.5	74.625	96.7534	33.2143	0	90.7857	22.0714	-5.85714		s-STR	0.300005	0.167318	0.00119408	0.268408	1	0.0437248	0.623924	0.896479		s-STR	No	No	Yes	No	No	No	No	No
t-CAR	-47.2857	-16.1607	5.96771	-57.5714	-90.7857	0	-68.7143	-96.6429		t-CAR	0.304339	0.777745	0.865918	0.104589	0.0437248	1	0.159341	0.0477845		t-CAR	No	No	No	No	No	No	No	No
t-PNA	21.4286	52.5536	74.682	11.1429	-22.0714	68.7143	0	-27.9286		t-PNA	0.641583	0.358679	0.0346009	0.753423	0.623924	0.159341	1	0.567331		t-PNA	No	No	No	No	No	No	No	No
t-STR	49.3571	80.4821	102.611	39.0714	5.85714	96.6429	27.9286	0		t-STR	0.283644	0.15982	0.00369384	0.270694	0.896479	0.0477845	0.567331	1		t-STR	No	No	No	No	No	No	No	No
										Bonferroni corrected significance level: 0,0018
ALogP98:
Differences:										p-values:										Significant differences:
	STR-CAR	STR-PNA	s-CAR	s-PNA	s-STR	t-CAR	t-PNA	t-STR			STR-CAR	STR-PNA	s-CAR	s-PNA	s-STR	t-CAR	t-PNA	t-STR			STR-CAR	STR-PNA	s-CAR	s-PNA	s-STR	t-CAR	t-PNA	t-STR
STR-CAR	0	-142.097	-43.7188	-153.401	-132.472	17.2063	-166.865	-137.722		STR-CAR	1	0.0096501	0.163553	< 0,0001	0.00160141	0.708631	0.000290016	0.00277957		STR-CAR	No	No	No	Yes	Yes	No	Yes	No
STR-PNA	142.097	0	98.3784	-11.3036	9.625	159.304	-24.7679	4.375		STR-PNA	0.0096501	1	0.0336188	0.80754	0.858669	0.00540565	0.665375	0.939103		STR-PNA	No	No	No	No	No	No	No	No
s-CAR	43.7188	-98.3784	0	-109.682	-88.7534	60.9251	-123.146	-94.0034		s-CAR	0.163553	0.0336188	1	< 0,0001	0.00296065	0.0848093	0.000494834	0.00783381		s-CAR	No	No	No	Yes	No	No	Yes	No
s-PNA	153.401	11.3036	109.682	0	20.9286	170.607	-13.4643	15.6786		s-PNA	< 0,0001	0.80754	< 0,0001	1	0.48566	< 0,0001	0.704317	0.658554		s-PNA	Yes	No	Yes	No	No	Yes	No	No
s-STR	132.472	-9.625	88.7534	-20.9286	0	149.679	-34.3929	-5.25		s-STR	0.00160141	0.858669	0.00296065	0.48566	1	0.000886325	0.444952	0.907176		s-STR	Yes	No	No	No	No	Yes	No	No
t-CAR	-17.2063	-159.304	-60.9251	-170.607	-149.679	0	-184.071	-154.929		t-CAR	0.708631	0.00540565	0.0848093	< 0,0001	0.000886325	1	0.000163825	0.00151196		t-CAR	No	No	No	Yes	Yes	No	Yes	Yes
t-PNA	166.865	24.7679	123.146	13.4643	34.3929	184.071	0	29.1429		t-PNA	0.000290016	0.665375	0.000494834	0.704317	0.444952	0.000163825	1	0.550681		t-PNA	Yes	No	Yes	No	No	Yes	No	No
t-STR	137.722	-4.375	94.0034	-15.6786	5.25	154.929	-29.1429	0		t-STR	0.00277957	0.939103	0.00783381	0.658554	0.907176	0.00151196	0.550681	1		t-STR	No	No	No	No	No	Yes	No	No
										Bonferroni corrected significance level: 0,0018
Apol:
Differences:										p-values:										Significant differences:
	STR-CAR	STR-PNA	s-CAR	s-PNA	s-STR	t-CAR	t-PNA	t-STR			STR-CAR	STR-PNA	s-CAR	s-PNA	s-STR	t-CAR	t-PNA	t-STR			STR-CAR	STR-PNA	s-CAR	s-PNA	s-STR	t-CAR	t-PNA	t-STR
STR-CAR	0	40.7639	51.6834	-5.15873	-46.6111	50.5317	-2.89683	-46.4683		STR-CAR	1	0.457746	0.0995051	0.869993	0.26679	0.272369	0.949828	0.312803		STR-CAR	No	No	No	No	No	No	No	No
STR-PNA	-40.7639	0	10.9195	-45.9226	-87.375	9.76786	-43.6607	-87.2321		STR-PNA	0.457746	1	0.813546	0.32227	0.105941	0.864544	0.445749	0.127638		STR-PNA	No	No	No	No	No	No	No	No
s-CAR	-51.6834	-10.9195	0	-56.8421	-98.2945	-1.15166	-54.5802	-98.1517		s-CAR	0.0995051	0.813546	1	< 0,0001	0.000995793	0.974008	0.122548	0.00548848		s-CAR	No	No	No	Yes	Yes	No	No	No
[truncated: 30 more rows]

## Sheet: Kruskal-Wallis_HID35
1.2	67.287	2	37.286	3	22.286	4.03333	30.858	5.13333	10.286	6	68.573	7.13333	35.572	8.2	10.286
[truncated: 145 more rows]
